# Supplementary material for: Characterisation of the Whole Blood mRNA Transcriptome in Holstein-Friesian and Jersey Calves in Response to Gradual Weaning
Source: PLoS One. 2016 Aug 1;11(8):e0159707. doi: 10.1371/journal.pone.0159707 (PMC4968839; doi:10.1371/journal.pone.0159707)
Supplement: S1 Table — (XLSX) [file pone.0159707.s001.xlsx]

## Sheet: Supplementary Table 5.1
S1 Table. Differentially expressed genes between Holstein-Friesian and Jersey calves at day -14, relative to weaning (P < 0.05; FDR < 0.1; fold change > 0.05)
ID	Gene name	Gene symbol	logFC	logCPM	PValue	FDR	Fold Change
ENSBTAG00000031825	hypothetical LOC786987		-5.12998	0.749627	7.28e-07	0.000181266	-35.0169
ENSBTAG00000021565	protease, serine, 2 (trypsin 2)	PRSS2	-5.09645	4.37062	3.89e-12	9.89e-09	-34.2126
ENSBTAG00000004757	latent transforming growth factor beta binding protein 4	LTBP4	-4.10899	2.06069	4.8e-05	0.00279901	-17.2556
ENSBTAG00000007772	solute carrier family 29 (nucleoside transporters), member 4	SLC29A4	-3.10915	0.962731	0.00106188	0.0193291	-8.62877
ENSBTAG00000032007	low-density lipoprotein receptor-related protein 11	LRP11	-2.82598	0.237576	0.000208509	0.00674973	-7.09097
ENSBTAG00000001476	similar to MHC class I antigen		-2.75821	4.57044	3.79e-05	0.00245972	-6.76558
ENSBTAG00000039682	mitochondrial tumor suppressor 1	MTUS1	-2.5802	1.93553	1.32e-08	8.83e-06	-5.98021
ENSBTAG00000000930	not annotated		-2.52069	1.16366	1.59e-08	1.01e-05	-5.73856
ENSBTAG00000017895	C-type lectin domain family 10, member A	CLEC10A	-2.41934	-0.368278	3.66e-11	7.76e-08	-5.34926
ENSBTAG00000009012	pentraxin-related gene, rapidly induced by IL-1 beta	PTX3	-2.31652	0.9284	0.000191744	0.00644523	-4.9813
ENSBTAG00000045895	neurofascin	NFASC	-2.28964	-0.79855	0.00158787	0.0251244	-4.88935
ENSBTAG00000037644	hemoglobin, gamma; hemoglobin, gamma 2; hemoglobin, beta		-2.07716	-0.332657	0.00119444	0.0206778	-4.21976
ENSBTAG00000002786	similar to Myeloid-associated differentiation marker		-2.05533	5.78034	0.000667849	0.0141193	-4.15637
ENSBTAG00000000795	nicotinamide nucleotide adenylyltransferase 2	NMNAT2	-2.01877	1.77881	0.000137248	0.0052056	-4.05239
ENSBTAG00000000570	ret proto-oncogene	RET	-2.00723	2.67747	7.24e-13	3.07e-09	-4.02009
ENSBTAG00000004950	brain ribonuclease	BRN	-1.945	4.07621	0.00170192	0.0262117	-3.85038
ENSBTAG00000008389	HtrA serine peptidase 1	HTRA1	-1.92843	0.490329	7.53e-05	0.00367979	-3.8064
ENSBTAG00000038263	CD1a molecule; hypothetical protein LOC781011; similar to CD1A antigen	CD1A	-1.89958	0.641429	0.00340665	0.0415403	-3.73103
ENSBTAG00000013203	glycoprotein V (platelet)	GP5	-1.83852	-0.0566355	0.000106062	0.00443296	-3.57644
ENSBTAG00000030424	C-type lectin domain family 1, member A	CLEC1A	-1.75405	1.65636	2.54e-06	0.000454944	-3.37304
ENSBTAG00000047914	cadherin-related family member 5 precursor	CDHR5/MUPCDH	-1.74136	1.46663	0.00439122	0.0483491	-3.34349
ENSBTAG00000038698	similar to ATP-binding cassette transporter C4		-1.7047	1.81486	0.00541117	0.0552688	-3.25961
ENSBTAG00000020097	PERP, TP53 apoptosis effector	PERP	-1.64857	-0.0256407	0.000592511	0.013025	-3.13523
ENSBTAG00000038288	killer cell immunoglobulin-like receptor, two domains, short cytoplasmic tail, 1	KIR2SL1	-1.63983	0.912708	1.19e-06	0.000281116	-3.11629
ENSBTAG00000007173	platelet-derived growth factor receptor, alpha polypeptide	PDGFRA	-1.62298	1.17037	0.000733668	0.0149429	-3.0801
ENSBTAG00000014975	solute carrier family 4, anion exchanger, member 3	SLC4A3	-1.61541	0.788066	0.000197076	0.00653799	-3.06398
ENSBTAG00000034384	Von Willebrand factor A domain containing 3B	VWA3B	-1.5666	1.45407	4.03e-07	0.000113717	-2.96206
ENSBTAG00000039504	not annotated		-1.51767	2.15386	9.07e-06	0.00100242	-2.86328
ENSBTAG00000016142	cytochrome b5 reductase 2	CYB5R2	-1.50076	1.048	0.0052348	0.0538134	-2.82992
ENSBTAG00000015994	Leucine rich repeat containing 63	LRRC63	-1.49471	0.7879	2.19e-05	0.00171445	-2.81808
ENSBTAG00000007904	keratin 72	KRT72	-1.48943	1.19886	4.18e-05	0.00256706	-2.80777
ENSBTAG00000012991	prune homolog 2 (Drosophila)	PRUNE2	-1.46308	0.22778	1.4e-07	5.56e-05	-2.75697
ENSBTAG00000003781	myeloproliferative leukemia virus oncogene	MPL	-1.45939	0.0392272	3.13e-06	0.000517075	-2.74992
ENSBTAG00000015241	epoxide hydrolase 2, cytoplasmic; similar to epoxide hydrolase 2, cytoplasmic	EPHX2	-1.41129	1.23048	0.002303	0.0317719	-2.65975
ENSBTAG00000014497	G protein-coupled receptor 31	GPR31	-1.40094	-0.457624	0.000149477	0.00547334	-2.64074
ENSBTAG00000045588	not annotated		-1.39031	3.75369	5.16e-05	0.00288813	-2.62136
ENSBTAG00000038706	metallothionein 1E	MT1E	-1.36442	-0.502234	0.00108061	0.0195032	-2.57473
ENSBTAG00000038843	NKG2C protein	NKG2C	-1.36183	0.545108	0.00239691	0.0325912	-2.57011
ENSBTAG00000010670	V-set and immunoglobulin domain containing 8	VSIG8	-1.33665	0.0391581	0.00229227	0.0317248	-2.52565
ENSBTAG00000020657	FAT tumor suppressor homolog 1 (Drosophila)	FAT1	-1.33379	2.47484	0.00635036	0.0608292	-2.52064
ENSBTAG00000006921	ATP-binding cassette, sub-family A (ABC1), member 6	ABCA6	-1.32186	6.03386	2.1e-09	2.22e-06	-2.49989
ENSBTAG00000010179	collagen, type V, alpha 3	COL5A3	-1.30377	0.0873663	0.00490228	0.0520509	-2.46872
ENSBTAG00000003528	similar to EGF-like module-containing mucin-like hormone receptor-like 2 precursor (EGF-like module EMR2) (CD312 antigen)		-1.30047	0.888795	4.37e-06	0.00064584	-2.46309
ENSBTAG00000006343	interleukin 1 receptor, type II	IL1R2	-1.29851	2.48132	6.65e-06	0.000862375	-2.45975
ENSBTAG00000039524	similar to MGC152498 protein		-1.29352	3.78738	0.00723326	0.0658132	-2.45125
ENSBTAG00000039932	hypothetical protein LOC100139209; leukocyte immunoglobulin-like receptor, subfamily A (with TM domain), member 4		-1.28699	3.00433	1.13e-05	0.00114953	-2.44019
ENSBTAG00000045751	not annotated		-1.28042	4.42332	0.00363346	0.0430711	-2.42909
ENSBTAG00000014628	2'-5'-oligoadenylate synthetase 2, 69/71kDa; 2',5'-oligoadenylate synthetase 1, 40/46kDa	OAS2	-1.27278	5.46276	0.00391126	0.0447716	-2.41627
ENSBTAG00000034498	lymphocyte antigen 6 complex, locus D	LY6D	-1.25815	-0.427043	0.00014861	0.00547316	-2.39188
ENSBTAG00000007450	complement factor B	C2	-1.23164	6.22217	0.0003611	0.00947963	-2.34834
ENSBTAG00000012208	MHC class I heavy chain		-1.22336	6.35464	1.71e-06	0.0003737	-2.3349
ENSBTAG00000046392	not annotated		-1.21726	-0.465081	0.00329667	0.040644	-2.32504
ENSBTAG00000005841	not annotated		-1.21229	4.9947	6.12e-10	7.77e-07	-2.31705
ENSBTAG00000002885	macrophage scavenger receptor 1	MSR1	-1.2034	3.4194	9.07e-06	0.00100242	-2.30282
ENSBTAG00000018778	transmembrane channel-like 1	TMC1	-1.19692	-0.118606	0.00225511	0.0314873	-2.2925
ENSBTAG00000007312	CD209 molecule	CD209	-1.19442	1.12991	0.0106642	0.0837449	-2.28853
ENSBTAG00000037527	2',5'-oligoadenylate synthetase 1, 40/46kDa	OAS1X	-1.17491	7.23669	2.05e-05	0.00164207	-2.25779
ENSBTAG00000039861	2',5'-oligoadenylate synthetase 1, 40/46kDa	OAS1Y	-1.16493	6.97273	0.000405897	0.0101522	-2.24222
ENSBTAG00000048226	not annotated		-1.15177	0.773819	0.00686777	0.0640689	-2.22187
ENSBTAG00000017045	fatty acid binding protein 2, intestinal	FABP2	-1.13981	0.0789317	0.0136186	0.0966963	-2.20353
ENSBTAG00000003454	regulator of G-protein signaling 20	RGS20	-1.13933	3.68016	8.68e-05	0.00391042	-2.20279
ENSBTAG00000006485	triggering receptor expressed on myeloid cells-like 1	TREML1	-1.13849	2.38852	0.000891603	0.0171387	-2.2015
ENSBTAG00000007191	chemokine (C-C motif) ligand 5	CCL5	-1.12631	5.08445	6.3e-09	4.54e-06	-2.18299
ENSBTAG00000007720	NKG2-A/NKG2-B type II integral membrane protein (NKG2-A/B-activating NK receptor) (NK cell receptor A) (CD159a antigen)	NKG2A	-1.12095	2.08274	0.000191411	0.00644523	-2.1749
ENSBTAG00000014707	ISG15 ubiquitin-like modifier	ISG15	-1.10904	6.48427	0.00406454	0.0457837	-2.15701
ENSBTAG00000002069	MHC class I heavy chain	BOLA	-1.10899	10.7901	2.22e-19	2.16e-15	-2.15694
ENSBTAG00000000793	laminin, gamma 2	LAMC2	-1.09962	0.350217	0.00245152	0.0330319	-2.14298
ENSBTAG00000014666	glycoprotein IX (platelet)	GP9	-1.0867	1.26647	0.00985505	0.0800717	-2.12388
ENSBTAG00000019728	CD164 sialomucin-like 2	CD164L2	-1.08545	-0.216481	4.21e-05	0.00256925	-2.12204
ENSBTAG00000013167	sialic acid binding Ig-like lectin 1, sialoadhesin	SIGLEC1	-1.08481	3.76615	0.00302441	0.0383132	-2.1211
ENSBTAG00000002425	sodium channel, voltage-gated, type IX, alpha subunit	SCN9A	-1.07212	-0.275917	7.03e-06	0.000884339	-2.10251
ENSBTAG00000017113	ankyrin repeat domain 33	ANKRD33	-1.0699	0.147735	3.39e-05	0.00232686	-2.09928
ENSBTAG00000014645	contactin 2 (axonal)	CNTN2	-1.0624	0.605865	0.006483	0.0615643	-2.0884
ENSBTAG00000039197	solute carrier family 2 (facilitated glucose transporter), member 9	SLC2A9	-1.04569	4.37774	5.26e-07	0.000139572	-2.06435
ENSBTAG00000017574	lamin A/C	LMNA	-1.03793	4.15281	0.00019908	0.00657016	-2.05329
ENSBTAG00000003607	family with sequence similarity 20, member C	FAM20C	-1.03755	2.30924	8.36e-06	0.000974891	-2.05274
ENSBTAG00000019741	complement component 3a receptor 1	C3AR1	-1.03704	3.41328	0.000156588	0.00562502	-2.05201
ENSBTAG00000002938	cadherin-like and PC-esterase domain containing 1	CPED1	-1.03693	1.26676	0.000330401	0.00887542	-2.05186
ENSBTAG00000045492	angiogenin, ribonuclease, RNase A family, 5; Angiogenin-1; Ribonuclease A A1	ANG	-1.02658	4.97559	5.64e-07	0.000143445	-2.03719
ENSBTAG00000039691	not annotated		-1.02129	0.815293	0.0120743	0.0900885	-2.02974
ENSBTAG00000014127	prostaglandin-endoperoxide synthase 2 (prostaglandin G/H synthase and cyclooxygenase)	PTGS2	-1.02037	2.18789	0.000471434	0.0112173	-2.02843
ENSBTAG00000016061	radical S-adenosyl methionine domain containing 2	RSAD2	-1.00598	5.63823	0.00304979	0.0385195	-2.0083
ENSBTAG00000039555	cytochrome c oxidase subunit VIIc	COX7C	-0.998627	3.6247	2.72e-09	2.31e-06	-1.9981
ENSBTAG00000037800	apolipoprotein B mRNA editing enzyme, catalytic polypeptide-like 3A	APOBEC3A	-0.994141	3.95771	0.00129251	0.0218676	-1.99189
ENSBTAG00000039892	not annotated		-0.99291	2.76569	0.000571507	0.0126729	-1.9902
ENSBTAG00000016456	CDC42 binding protein kinase beta (DMPK-like)	CDC42BPB	-0.987421	2.76882	0.000129948	0.00506478	-1.98264
ENSBTAG00000021215	von Willebrand factor A domain containing 5A	VWA5A	-0.978499	-0.202701	0.00612954	0.0601405	-1.97041
ENSBTAG00000019612	ribonuclease, RNase A family, 4	RNASE4	-0.977892	5.87452	1.32e-07	5.4e-05	-1.96959
ENSBTAG00000016549	Leucine rich repeat containing 16A	LRRC16A	-0.975757	1.25079	3.63e-05	0.00241314	-1.96667
ENSBTAG00000046090	not annotated		-0.975115	2.7349	0.00540483	0.0552484	-1.9658
ENSBTAG00000026148	not annotated		-0.9692	0.832781	0.0111605	0.0858389	-1.95775
ENSBTAG00000027205	PiggyBac transposable element-derived protein 5	PGBD5	-0.964993	0.359895	0.000997097	0.0184536	-1.95205
ENSBTAG00000011873	potassium voltage-gated channel, Isk-related family, member 3	KCNE3	-0.964856	1.91139	2.67e-07	8.48e-05	-1.95187
ENSBTAG00000047776	not annotated		-0.964173	3.01221	7.02e-06	0.000884339	-1.95094
ENSBTAG00000010146	plexin B3	PLXNB3	-0.964106	0.200465	0.00134196	0.0222388	-1.95085
ENSBTAG00000012030	tubulin tyrosine ligase-like family, member 1	TTLL1	-0.955748	4.67245	0.00768232	0.0677858	-1.93959
ENSBTAG00000017810	EF-hand domain (C-terminal) containing 1	EFHC1	-0.946081	0.570992	0.00305567	0.0385554	-1.92663
ENSBTAG00000015127	syndecan 4	SDC4	-0.940917	1.44719	2.9e-05	0.00205899	-1.91975
ENSBTAG00000024426	protein phosphatase 1, regulatory (inhibitor) subunit 9A	PPP1R9A	-0.935391	1.75884	0.000658548	0.0140065	-1.91241
ENSBTAG00000017685	junction plakoglobin	JUP	-0.932889	1.6529	0.00118076	0.0205518	-1.90909
ENSBTAG00000007421	cadherin 5, type 2 (vascular endothelium)	CDH5	-0.93221	0.0620921	0.00451956	0.0492516	-1.9082
ENSBTAG00000022461	septin 10	SEP10	-0.927546	0.365035	0.00164539	0.0256205	-1.90204
ENSBTAG00000008483	calcitonin receptor-like	CALCRL	-0.92338	4.73132	2.62e-09	2.31e-06	-1.89655
ENSBTAG00000033748	interleukin 18 receptor accessory protein	IL18RAP	-0.921073	3.03293	0.000547734	0.012296	-1.89352
ENSBTAG00000020729	dehydrogenase/reductase (SDR family) member 7	DHRS7	-0.91943	4.78136	5.19e-11	9.43e-08	-1.89137
ENSBTAG00000002283	frizzled homolog 7 (Drosophila)	FZD7	-0.915298	0.40828	2.38e-06	0.000438385	-1.88596
ENSBTAG00000019348	not annotated		-0.912052	5.03706	7.84e-05	0.00371594	-1.88172
ENSBTAG00000048155	ficolin-2	FCN2	-0.911741	9.56315	0.000485247	0.0114601	-1.88131
ENSBTAG00000025250	chemokine (C-C motif) ligand 3	CCL3 (annotated CCL3L3 in IPA)	-0.900607	1.83697	0.000256455	0.00767392	-1.86685
ENSBTAG00000021953	like-glycosyltransferase; like-glycosyltransferase	LARGE	-0.900553	2.02967	2.95e-07	8.93e-05	-1.86678
ENSBTAG00000013452	aquaporin 9	AQP9	-0.898227	2.48836	1.97e-07	6.75e-05	-1.86377
ENSBTAG00000011278	xylulokinase homolog (H. influenzae)	XYLB	-0.89608	2.03147	7.3e-06	0.000901281	-1.861
ENSBTAG00000001154	diacylglycerol O-acyltransferase homolog 2 (mouse)	DGAT2	-0.894084	6.79573	0.00348384	0.0422786	-1.85843
ENSBTAG00000027201	ras association (RalGDS/AF-6) and pleckstrin homology domains 1	RAPH1	-0.888404	0.930108	0.000478652	0.0113678	-1.85113
ENSBTAG00000000440	heat shock 27kDa protein 2	HSPB2-C11ORF52	-0.880025	-0.226623	0.00845889	0.0723172	-1.84041
ENSBTAG00000017661	regulatory factor X, 2 (influences HLA class II expression)	RFX2	-0.878021	3.46408	2.5e-06	0.000454514	-1.83785
ENSBTAG00000019018	similar to interferon-induced protein 1-8U; interferon induced transmembrane protein 3 (1-8U)		-0.877271	7.36606	0.000129159	0.00504954	-1.8369
ENSBTAG00000011002	coiled-coil domain containing 136	CCDC136	-0.87663	2.37726	0.0075971	0.0674141	-1.83608
ENSBTAG00000006549	family with sequence similarity 26, member F	FAM26F	-0.875645	2.91197	0.000196329	0.00653799	-1.83483
ENSBTAG00000007181	Kinesin family member C3	KIFC3	-0.872325	3.98734	0.000309033	0.00855446	-1.83061
ENSBTAG00000013496	carboxypeptidase M	CPM	-0.862948	3.69925	0.000377801	0.00971728	-1.81875
ENSBTAG00000004608	similar to Myeloid cell surface antigen CD33 precursor (Sialic acid-binding Ig-like lectin 3) (Siglec-3) (gp67)		-0.85973	3.58938	0.000826903	0.0163146	-1.8147
ENSBTAG00000004443	not annotated		-0.849953	4.03064	0.00638999	0.0610461	-1.80244
ENSBTAG00000004043	Fc gamma 2 receptor		-0.848235	7.38979	5.83e-08	2.96e-05	-1.8003
ENSBTAG00000001725	chemokine (C-X-C motif) ligand 10	CXCL10	-0.84707	3.07208	0.00229408	0.0317248	-1.79884
ENSBTAG00000012338	fumarylacetoacetate hydrolase (fumarylacetoacetase)	FAH	-0.84578	1.09734	4.67e-05	0.00274934	-1.79724
ENSBTAG00000015311	protein tyrosine phosphatase, receptor type, R	PTPRR	-0.842432	2.42374	2.28e-05	0.00174892	-1.79307
ENSBTAG00000009873	neuritin 1	NRN1	-0.842043	3.24285	0.00011412	0.00464648	-1.79259
ENSBTAG00000003494	hypothetical LOC519774	C20ORF194	-0.841651	0.123838	0.0102652	0.0816932	-1.7921
ENSBTAG00000006338	V-myc avian myelocytomatosis viral oncogene lung carcinoma derived homolog	MYCL	-0.834962	0.393107	0.00669818	0.0630163	-1.78381
ENSBTAG00000001001	ankyrin repeat domain 55; similar to ankyrin repeat domain 55	ANKRD55	-0.831605	0.250818	0.00385452	0.0444828	-1.77966
ENSBTAG00000019181	similar to BAI1-associated protein 2-like 1	BAIAP2L1	-0.830903	-0.36243	0.0037972	0.0441401	-1.7788
ENSBTAG00000046409	early growth response 2	EGR2	-0.828044	2.48829	0.000135239	0.00518692	-1.77528
ENSBTAG00000011137	MORN repeat containing 4	MORN4	-0.827107	1.3352	0.00156899	0.0248805	-1.77412
ENSBTAG00000014983	interleukin 23 receptor	IL23R	-0.822121	-0.310185	0.00314688	0.0394322	-1.768
ENSBTAG00000030749	DNAJC6 protein; DnaJ (Hsp40) homolog, subfamily C, member 6	DNAJC6	-0.819079	1.08309	0.00016356	0.00575678	-1.76428
ENSBTAG00000010801	carboxymethylenebutenolidase homolog (Pseudomonas)	CMBL	-0.815655	4.30038	2.62e-07	8.48e-05	-1.7601
ENSBTAG00000011961	platelet factor 4	PF4	-0.815627	8.27604	0.00476926	0.0511377	-1.76006
ENSBTAG00000001814	plexin D1	PLXND1	-0.811071	5.63013	5.3e-05	0.00294325	-1.75451
ENSBTAG00000011882	solute carrier family 24 (sodium/potassium/calcium exchanger), member 3	SLC24A3	-0.810936	2.93506	1.82e-05	0.00151841	-1.75435
ENSBTAG00000023186	mitochondrial ribosomal protein S17		-0.810067	0.406431	0.00330942	0.0406668	-1.75329
ENSBTAG00000012815	C-type lectin domain family 12, member A	CLEC12A	-0.808543	6.43179	5.05e-05	0.00286299	-1.75144
ENSBTAG00000046158	complement factor B	CFB	-0.805717	2.65355	9.57e-05	0.00420773	-1.74801
ENSBTAG00000007286	similar to histone cluster 1, H2ad		-0.798279	-0.0509699	0.0066373	0.0627015	-1.73903
ENSBTAG00000020554	allograft inflammatory factor 1	AIF1	-0.797442	6.98978	2.74e-07	8.5e-05	-1.73802
ENSBTAG00000020178	arylsulfatase family, member K	ARSK	-0.796968	-0.0615454	0.00171714	0.0263185	-1.73745
ENSBTAG00000046337	tubulin, beta 6 class V	TUBB6	-0.796828	3.17775	0.000211466	0.00677864	-1.73728
ENSBTAG00000031265	SVOP-like	SVOPL	-0.796754	-0.295177	0.0107515	0.0841707	-1.73719
ENSBTAG00000039016	not annotated		-0.7944	4.26516	0.00886012	0.0746035	-1.73436
ENSBTAG00000027684	folate receptor 2 (fetal)	FOLR2	-0.793966	1.10108	0.00220345	0.0309018	-1.73383
ENSBTAG00000017624	RAB17, member RAS oncogene family	RAB17	-0.793396	1.45291	0.0117613	0.0887349	-1.73315
ENSBTAG00000001151	amyloid beta (A4) precursor-like protein 1	APLP1	-0.790751	1.39463	0.00307952	0.0387409	-1.72997
ENSBTAG00000008353	cyclin-dependent kinase inhibitor 1A (p21, Cip1)	CDKN1A	-0.789967	4.26155	5.14e-05	0.00288813	-1.72903
ENSBTAG00000046419	two pore channel 3	TPC3	-0.788665	4.85189	0.00584141	0.0581726	-1.72747
ENSBTAG00000011324	elastin microfibril interfacer 1	EMILIN1	-0.785873	1.76011	0.0045197	0.0492516	-1.72414
ENSBTAG00000012818	PDZ and LIM domain 5	PDLIM5	-0.781845	2.88399	1.13e-05	0.00114953	-1.71933
ENSBTAG00000007881	Interferon-induced protein with tetratricopeptide repeats 1 (IFIT-1)	IFIT1	-0.781604	8.16173	0.00174127	0.026592	-1.71904
ENSBTAG00000004322	v-fos FBJ murine osteosarcoma viral oncogene homolog	FOS	-0.781032	5.11228	7.75e-05	0.00368631	-1.71836
ENSBTAG00000040279	keratin 24	KRT24	-0.779745	0.340086	0.0133731	0.095775	-1.71683
ENSBTAG00000026944	not annotated		-0.779463	3.96539	0.00404488	0.0457837	-1.71649
ENSBTAG00000033727	RNA binding protein with multiple splicing	RBPMS	-0.777949	1.67513	0.000375211	0.0096899	-1.71469
ENSBTAG00000007883	not annotated		-0.774125	7.69603	0.00152573	0.0244156	-1.71015
ENSBTAG00000019107	growth arrest-specific 7	GAS7	-0.773508	5.7047	5.38e-07	0.000139572	-1.70942
ENSBTAG00000003196	3'-phosphoadenosine 5'-phosphosulfate synthase 2	PAPSS2	-0.773227	6.08342	1.03e-10	1.46e-07	-1.70909
ENSBTAG00000003806	extracellular matrix protein 1	ECM1	-0.772686	6.15995	0.000395409	0.00996839	-1.70845
ENSBTAG00000015296	protein tyrosine phosphatase, receptor type, B	PTPRB	-0.771196	1.30253	0.0016874	0.0260512	-1.70668
ENSBTAG00000019066	chromosome 8 open reading frame 13 ortholog	FAM167A	-0.771104	1.58546	0.00632807	0.0608109	-1.70658
ENSBTAG00000000942	signal-induced proliferation-associated 1 like 2	SIPA1L2	-0.770313	1.01986	0.00229804	0.031738	-1.70564
ENSBTAG00000015108	Usher syndrome 1C binding protein 1	USHBP1	-0.769563	1.82745	5.51e-05	0.00302396	-1.70475
ENSBTAG00000018248	monoglyceride lipase	MGLL	-0.76707	1.81929	0.00388437	0.0446246	-1.70181
ENSBTAG00000030426	not annotated		-0.765427	3.42231	0.000214116	0.00681844	-1.69987
ENSBTAG00000034349	interferon-induced protein 44	IFI44	-0.764594	5.51231	0.0038704	0.044578	-1.69889
ENSBTAG00000011582	serine incorporator 2	SERINC2	-0.763652	4.51923	0.000143163	0.00535007	-1.69778
ENSBTAG00000003166	AXL receptor tyrosine kinase	AXL	-0.762082	2.45386	0.00403735	0.0457837	-1.69594
ENSBTAG00000034246	acrosin binding protein	ACRBP	-0.760801	2.80183	0.000724162	0.0148407	-1.69443
ENSBTAG00000007275	triggering receptor expressed on myeloid cells 2	TREM2	-0.757844	4.54668	0.00207873	0.0298654	-1.69096
ENSBTAG00000011936	ATPase class I type 8B member 4	ATP8B4	-0.756511	5.29647	1.59e-05	0.00138554	-1.6894
ENSBTAG00000012265	Von Willebrand factor precursor	VWF	-0.753855	5.3397	0.00989916	0.080216	-1.68629
ENSBTAG00000021574	transcription factor 7-like 2 (T-cell specific, HMG-box)	TCF7L2	-0.752907	3.4499	8.92e-05	0.0039899	-1.68518
ENSBTAG00000006403	chromosome 1 open reading frame 115	C1ORF115	-0.752749	1.02157	0.0125499	0.0924905	-1.685
ENSBTAG00000005574	clusterin	CLU	-0.750323	5.58683	0.00746372	0.0666906	-1.68217
ENSBTAG00000002052	procollagen-lysine 1, 2-oxoglutarate 5-dioxygenase 1	PLOD1	-0.748482	5.12221	6.43e-09	4.54e-06	-1.68002
ENSBTAG00000020990	purinergic receptor P2Y, G-protein coupled, 14	P2RY14	-0.747736	0.709619	0.011049	0.0852472	-1.67916
ENSBTAG00000021291	syntaxin binding protein 6 (amisyn)	STXBP6	-0.745376	1.05652	0.000506266	0.0116533	-1.67641
ENSBTAG00000035081	serine incorporator 2-like	SERINC2	-0.743012	4.17808	0.000441222	0.0107604	-1.67367
ENSBTAG00000001903	chromosome 2 open reading frame 50 ortholog	C2ORF50	-0.742821	0.505064	0.0026596	0.0349823	-1.67345
ENSBTAG00000019386	non-classical MHC class I antigen	BOLA-NC	-0.738565	8.75528	0.000234626	0.00723582	-1.66852
ENSBTAG00000020602	indoleamine 2,3-dioxygenase 1	IDO1	-0.738007	7.12184	1.87e-05	0.00153216	-1.66787
ENSBTAG00000002178	periplakin	PPL	-0.736749	-0.102952	0.0106468	0.0837121	-1.66642
ENSBTAG00000012029	killer cell lectin-like receptor subfamily B, member 1	KLRB1	-0.734714	2.88957	0.000496339	0.0115928	-1.66407
ENSBTAG00000002845	cadherin 10, type 2	CDH10	-0.734024	3.95134	0.0109673	0.0849702	-1.66327
ENSBTAG00000012289	aflatoxin B1 aldehyde reductase member 2	AKR7A2	-0.733112	5.4325	1.74e-07	6.45e-05	-1.66222
ENSBTAG00000009943	not annotated		-0.732564	1.07336	0.000610928	0.0132673	-1.66159
ENSBTAG00000021829	GM2 ganglioside activator	GM2A	-0.728952	5.08972	1.37e-05	0.00128328	-1.65743
ENSBTAG00000011037	RNA binding protein with multiple splicing 2	RBPMS2	-0.726171	0.756098	0.00578557	0.0577091	-1.65424
ENSBTAG00000045907	tumor necrosis factor ligand superfamily member 13B	TNFSF13B	-0.724723	0.454741	0.00142362	0.0232501	-1.65258
ENSBTAG00000001847	centlein, centrosomal protein	CNTLN	-0.723851	0.869321	0.000940294	0.0177788	-1.65159
ENSBTAG00000012855	lipoprotein lipase	LPL	-0.717707	5.02296	0.00277934	0.0360717	-1.64457
ENSBTAG00000007642	adenosine A3 receptor	ADORA3	-0.716805	1.685	0.00220337	0.0309018	-1.64354
ENSBTAG00000016204	complement component 1, r subcomponent-like	C1RL	-0.715962	3.89781	0.000103211	0.00435684	-1.64258
ENSBTAG00000010238	leukotriene B4 receptor	LTB4R	-0.714275	1.72057	0.000501807	0.0116139	-1.64066
ENSBTAG00000019015	hypothetical protein LOC777594	IFITM3	-0.713905	6.98204	0.00040034	0.0100528	-1.64024
ENSBTAG00000006679	microphthalmia-associated transcription factor	MITF	-0.713845	4.59252	3.08e-06	0.000516931	-1.64017
ENSBTAG00000009786	scinderin	SCIN	-0.7133	2.96368	9.47e-06	0.00103685	-1.63955
ENSBTAG00000006256	protein tyrosine phosphatase, receptor type, O	PTPRO	-0.710247	2.07667	0.00156638	0.0248781	-1.63608
ENSBTAG00000001801	synaptotagmin IV	SYT4	-0.710138	2.75971	0.00667586	0.0628787	-1.63596
ENSBTAG00000004722	THUMP domain containing 2	THUMPD2	-0.7088	3.08505	4.85e-05	0.00281267	-1.63444
ENSBTAG00000005092	receptor tyrosine kinase-like orphan receptor 2	ROR2	-0.708642	1.66978	0.0100432	0.0809214	-1.63427
ENSBTAG00000030317	protein phosphatase 1, regulatory subunit 26	PPP1R26	-0.707044	0.980418	0.00317967	0.0397255	-1.63246
ENSBTAG00000011563	not annotated		-0.704336	3.01836	0.000231547	0.00721088	-1.62939
ENSBTAG00000005734	GATA-6	GATA6	-0.704285	-0.0815568	0.0103778	0.0821048	-1.62934
ENSBTAG00000003510	multimerin 2	MMRN2	-0.704064	-0.20811	0.00673003	0.063155	-1.62909
ENSBTAG00000005534	enolase 3 (beta, muscle)	ENO3	-0.703892	5.53618	0.000219851	0.00696616	-1.62889
ENSBTAG00000010956	scavenger receptor class B, member 2	SCARB2	-0.701563	5.84085	2.35e-05	0.00174892	-1.62627
ENSBTAG00000021958	granzyme A (granzyme 1, cytotoxic T-lymphocyte-associated serine esterase 3)	GZMA	-0.701551	4.36889	0.000324869	0.00883893	-1.62625
ENSBTAG00000017310	chromosome 21 open reading frame 63 ortholog	EVA1C	-0.700917	2.82303	8.59e-06	0.000991771	-1.62554
ENSBTAG00000001078	sarcalumenin	SRL	-0.700856	0.827519	0.0134766	0.0960922	-1.62547
ENSBTAG00000003826	sodium channel, voltage-gated, type I, beta	SCN1B	-0.700453	0.215143	0.00532276	0.0545411	-1.62501
ENSBTAG00000046580	DEXH (Asp-Glu-X-His) box polypeptide 58	DHX58/LGP2	-0.698694	6.41407	8.54e-05	0.00387531	-1.62303
ENSBTAG00000027024	Rho GTPase activating protein 5	ARHGAP5	-0.693407	2.75417	7.63e-05	0.00367979	-1.6171
ENSBTAG00000011677	histone cluster 1, H1c	HIST1H1C	-0.691066	4.01773	0.00219619	0.0309018	-1.61448
ENSBTAG00000043971	notch homolog 3	NOTCH3	-0.690978	4.67313	0.000128174	0.00502647	-1.61438
ENSBTAG00000019866	neuropilin 1	NRP1	-0.690948	6.18593	7.54e-05	0.00367979	-1.61434
ENSBTAG00000037537	similar to sialic acid binding Ig-like lectin 5	SIGLEC8	-0.690332	2.71689	0.00260793	0.0345301	-1.61365
ENSBTAG00000008792	ribonuclease, RNase A family, k6	RNASE6	-0.683227	7.88926	4.95e-05	0.00284563	-1.60573
ENSBTAG00000004263	ATPase, H+ transporting, lysosomal V0 subunit a4	ATP6V0A4	-0.679266	3.18178	0.00932847	0.0769659	-1.60133
ENSBTAG00000019519	PWWP domain containing 2B	PWWP2B	-0.678978	1.55585	0.00223434	0.031266	-1.601
ENSBTAG00000011019	hypothetical LOC618367	HRASLS2	-0.678032	5.78207	0.00412364	0.0461812	-1.59996
ENSBTAG00000002346	hydroxy-delta-5-steroid dehydrogenase, 3 beta- and steroid delta-isomerase 7	HSD3B7	-0.674655	2.40183	9.85e-06	0.00106031	-1.59621
ENSBTAG00000000928	sperm antigen with calponin homology and coiled-coil domains 1	SPECC1	-0.674455	4.26276	1.02e-07	4.63e-05	-1.59599
ENSBTAG00000001110	solute carrier family 16, member 5 (monocarboxylic acid transporter 6)	SLC16A5	-0.673701	4.27446	9.61e-07	0.000234872	-1.59516
ENSBTAG00000013525	chromosome 6 open reading frame 25	C6ORF25	-0.673473	7.94	0.00567192	0.0571051	-1.59491
ENSBTAG00000007870	FK506 binding protein 14, 22 kDa	FKBP14	-0.672388	3.71412	0.00330225	0.0406573	-1.59371
ENSBTAG00000016140	PTPRF interacting protein, binding protein 2 (liprin beta 2)	PPFIBP2	-0.67032	2.3822	3.6e-05	0.00240449	-1.59143
ENSBTAG00000012387	peptidylglycine alpha-amidating monooxygenase	PAM	-0.668648	7.53058	2.6e-07	8.48e-05	-1.58958
ENSBTAG00000031998	chemokine (C-X-C motif) ligand 16	CXCL16	-0.667281	4.87892	3.65e-07	0.000105468	-1.58808
ENSBTAG00000026501	cytochrome P450, family 2, subfamily D, polypeptide 6	MGC127055	-0.664525	2.89049	4.58e-06	0.000661834	-1.58505
ENSBTAG00000045529	natural cytotoxicity triggering receptor 1	NCR1	-0.662769	3.30552	0.000632655	0.0136015	-1.58312
ENSBTAG00000004547	oxidized low density lipoprotein (lectin-like) receptor 1	OLR1	-0.661215	5.83459	2.42e-05	0.00178403	-1.58141
ENSBTAG00000014400	E2F transcription factor 2	E2F2	-0.659396	4.68923	2.28e-09	2.23e-06	-1.57942
ENSBTAG00000012128	aminoadipate-semialdehyde synthase	AASS	-0.658602	3.44146	3.88e-05	0.00248216	-1.57855
ENSBTAG00000040128	frizzled homolog 4 (Drosophila)	FZD4	-0.658023	0.75638	0.0115415	0.0878123	-1.57792
ENSBTAG00000013861	solute carrier family 8 (sodium/calcium exchanger), member 1	SLC8A1	-0.655976	3.55768	3.45e-05	0.00235656	-1.57568
ENSBTAG00000005300	transmembrane protein 51	TMEM51	-0.655331	3.99495	0.00429277	0.0476366	-1.57498
ENSBTAG00000010244	chloride intracellular channel 5	CLIC5	-0.654235	3.18873	1.21e-05	0.00118754	-1.57378
ENSBTAG00000004472	TCTEL1 protein	DYNLT1	-0.651335	6.17583	0.000233194	0.00722673	-1.57062
ENSBTAG00000002100	granzyme M (lymphocyte met-ase 1)	GZMM	-0.648964	2.12061	0.00461813	0.0500238	-1.56804
ENSBTAG00000025659	Zinc finger protein 618	ZNF618	-0.647412	2.39993	0.000578552	0.0127696	-1.56636
ENSBTAG00000013755	integrin, beta 5	ITGB5	-0.645509	2.34996	0.000922136	0.0174876	-1.56429
ENSBTAG00000014687	tumor protein p53 inducible protein 13	TP53I13	-0.644157	1.02151	0.0132904	0.0954592	-1.56283
ENSBTAG00000005448	RAS p21 protein activator 4		-0.643346	4.0336	0.000854796	0.0166342	-1.56195
ENSBTAG00000019321	dihydrouridine synthase 1-like (S. cerevisiae); similar to Coiled-coil domain containing 57	CCDC57	-0.642843	4.92442	0.00124445	0.0213388	-1.5614
ENSBTAG00000006143	cAMP responsive element binding protein 3-like 1	CREB3L1	-0.642329	4.30138	0.00175447	0.0267614	-1.56085
ENSBTAG00000013369	collagen alpha-1(XIV) chain precursor (Undulin)	COL14A1	-0.641956	2.02953	0.000834474	0.0163877	-1.56044
ENSBTAG00000008735	vasohibin 1	VASH1	-0.641115	2.49852	0.00183725	0.027335	-1.55953
ENSBTAG00000009655	tensin 3	TNS3	-0.64092	6.94482	1.46e-05	0.00132534	-1.55932
ENSBTAG00000031069	sorting nexin 24; hypothetical LOC780987	SNX24	-0.640565	3.43256	0.00024933	0.00757892	-1.55894
ENSBTAG00000008091	selenium binding protein 1	SELENBP1	-0.639835	0.46839	0.0134495	0.0960589	-1.55815
ENSBTAG00000017367	interferon-induced protein with tetratricopeptide repeats 5	IFIT5	-0.636475	6.85803	0.000261461	0.00776197	-1.55453
ENSBTAG00000008545	activating transcription factor 3	ATF3	-0.636319	3.12941	7.45e-05	0.00367979	-1.55436
ENSBTAG00000038490	C-type lectin domain family 4, member A	CLEC4A	-0.636172	4.64285	0.0012125	0.0209037	-1.5542
ENSBTAG00000002767	guanine nucleotide binding protein (G protein), beta polypeptide 4	GNB4	-0.636037	3.95373	0.000501812	0.0116139	-1.55405
ENSBTAG00000021245	sprouty homolog 1, antagonist of FGF signaling (Drosophila)	SPRY1	-0.63444	0.953298	0.000497691	0.011603	-1.55233
ENSBTAG00000010082	similar to alpha 1 type XV collagen	COL15A1	-0.634262	2.32582	0.0133855	0.095775	-1.55214
ENSBTAG00000008182	FBJ murine osteosarcoma viral oncogene homolog B	FOSB	-0.634095	3.47129	0.00843912	0.0722071	-1.55196
ENSBTAG00000013953	caldesmon 1	CALD1	-0.63401	3.78856	0.0053188	0.0545411	-1.55187
ENSBTAG00000024492	similar to protein tyrosine phosphatase, non-receptor type 11		-0.633897	2.90001	0.00244596	0.0330319	-1.55175
ENSBTAG00000001066	Paired immunoglobulin-like type 2 receptor alpha precursor (Inhibitory receptor PILR-alpha) (Cell surface receptor FDF03)	PILRA	-0.633092	7.8041	1.85e-05	0.00153216	-1.55089
ENSBTAG00000027444	supervillin	SVIL	-0.631349	5.91493	0.000595209	0.0130516	-1.54901
ENSBTAG00000013759	tetraspanin 9	TSPAN9	-0.631074	0.271085	0.00522941	0.0538015	-1.54872
ENSBTAG00000008313	kruppel-like factor 15	KLF15	-0.629876	1.06136	0.00329581	0.040644	-1.54743
ENSBTAG00000009789	guanine nucleotide binding protein (G protein), q polypeptide	GNAQ	-0.629153	3.47829	7.95e-05	0.00372558	-1.54666
ENSBTAG00000016208	transglutaminase 2 (C polypeptide, protein-glutamine-gamma-glutamyltransferase)	TGM2	-0.628907	4.19227	0.00960344	0.0785946	-1.54639
ENSBTAG00000008294	potassium inwardly-rectifying channel, subfamily J, member 2	KCNJ2	-0.628868	4.49005	0.00393377	0.0449078	-1.54635
ENSBTAG00000039657	histone cluster 2, H2ab; similar to histone, H2A; histone H2A	HIST1H2AC	-0.628656	2.7637	0.00799901	0.0696017	-1.54612
ENSBTAG00000002154	G protein-coupled receptor 141	GPR141	-0.628238	1.91021	0.000175248	0.00600189	-1.54568
ENSBTAG00000002770	transcobalamin II; macrocytic anemia	TCN2	-0.628016	5.53284	2.28e-05	0.00174892	-1.54544
ENSBTAG00000009049	hypothetical LOC507581		-0.627957	3.00262	5.31e-07	0.000139572	-1.54538
ENSBTAG00000000898	coagulation factor II (thrombin) receptor-like 2	F2RL2	-0.626365	2.20566	0.0109063	0.0847039	-1.54367
ENSBTAG00000031725	tumor necrosis factor-like weak inducer of apoptosis	TNFSF12	-0.625999	3.43707	7.53e-05	0.00367979	-1.54328
ENSBTAG00000020520	RAS, dexamethasone-induced 1	RASD1	-0.625805	3.02517	0.000746502	0.0151218	-1.54307
ENSBTAG00000020031	polycystic kidney disease 2 (autosomal dominant)	PKD2	-0.625669	0.399178	0.00585945	0.0582235	-1.54293
ENSBTAG00000006138	sema domain, immunoglobulin domain (Ig), short basic domain, secreted, (semaphorin) 3C	SEMA3C	-0.624947	2.83287	0.000915631	0.0173901	-1.54215
ENSBTAG00000016629	adenylate cyclase 9	ADCY9	-0.624123	4.1661	1.59e-05	0.00138554	-1.54127
ENSBTAG00000002096	Fc fragment of IgG, low affinity IIIa, receptor (CD16a)	FCGR3A	-0.617499	7.91724	0.00303104	0.0383589	-1.53421
ENSBTAG00000000095	CD274 molecule	CD274/PD-L1	-0.617148	3.70475	0.012027	0.0900373	-1.53384
ENSBTAG00000013065	hemochromatosis	HFE	-0.617057	1.58838	0.000834305	0.0163877	-1.53374
ENSBTAG00000018015	interleukin 27	IL27	-0.616307	3.72777	5.76e-06	0.000795321	-1.53295
ENSBTAG00000039520	signal-regulatory protein beta 1	SIRPB1	-0.616065	6.89791	0.010526	0.0828648	-1.53269
ENSBTAG00000005110	Ca++-dependent secretion activator 2	CADPS2	-0.61582	2.42765	0.00189111	0.0279203	-1.53243
ENSBTAG00000009477	pirin (iron-binding nuclear protein)	PIR	-0.615606	2.99921	4.61e-05	0.00273702	-1.5322
ENSBTAG00000007994	organic solute carrier protein 1	OSCP1	-0.615175	1.1555	0.0108651	0.0845898	-1.53174
ENSBTAG00000026283	aspartate beta-hydroxylase	ASPH	-0.614478	2.99933	1.99e-05	0.00159917	-1.531
ENSBTAG00000004869	coxsackie virus and adenovirus receptor	CXADR	-0.613918	-0.054129	0.0119427	0.089683	-1.53041
ENSBTAG00000000781	huntingtin interacting protein 1	HIP1	-0.613133	4.77863	6.99e-05	0.00352365	-1.52958
ENSBTAG00000009390	family with sequence similarity 188, member B	FAM188B	-0.61287	0.454752	0.00462257	0.0500293	-1.5293
ENSBTAG00000033669	interleukin 17 receptor C	IL17RC	-0.611382	3.89305	0.00103564	0.0190158	-1.52772
ENSBTAG00000038149	NLR family, pyrin domain containing 12	NLRP12	-0.611131	4.12636	0.0107716	0.084224	-1.52746
ENSBTAG00000009768	interferon-induced protein with tetratricopeptide repeats 3	IFIT3	-0.610837	7.7536	0.0117039	0.088465	-1.52715
ENSBTAG00000001793	hydroxysteroid (11-beta) dehydrogenase 1-like	HSD11B1L	-0.610218	1.42003	0.00298196	0.0379267	-1.52649
ENSBTAG00000046981	supervillin	SVIL	-0.609732	5.80271	5.69e-05	0.0030517	-1.52598
ENSBTAG00000025308	stonin 2	STON2	-0.609174	0.835353	0.000926292	0.0175402	-1.52539
ENSBTAG00000015160	phospholipase D family, member 4	PLD4	-0.608876	7.36113	0.000169329	0.00583828	-1.52507
ENSBTAG00000011761	low density lipoprotein receptor-related protein 6	LRP6	-0.608847	2.35831	0.000453819	0.0109833	-1.52504
ENSBTAG00000012504	growth arrest-specific 2 like 1	GAS2L1	-0.608124	4.38724	0.00161772	0.0254077	-1.52428
ENSBTAG00000017287	DNA-damage regulated autophagy modulator 1	DRAM1/FLJ11259	-0.60743	4.40099	9.25e-05	0.00410798	-1.52354
ENSBTAG00000044158	low density lipoprotein receptor class A domain containing 3	LDLRAD3	-0.607108	1.87298	0.00779233	0.0683766	-1.5232
ENSBTAG00000046266	not annotated	TNFSF9	-0.606879	2.99182	0.000987068	0.018389	-1.52296
ENSBTAG00000038916	prickle homolog 4 (Drosophila)		-0.605942	1.2562	0.000902849	0.0172065	-1.52197
ENSBTAG00000019754	protein kinase C, delta binding protein	PRKCDBP	-0.60557	2.28147	0.000490945	0.0115497	-1.52158
ENSBTAG00000018137	alpha-2-macroglobulin	A2M	-0.600128	8.51676	2.58e-05	0.0018946	-1.51585
ENSBTAG00000007169	purinergic receptor P2X, ligand-gated ion channel, 1	P2RX1	-0.59991	2.35186	0.00671716	0.0630808	-1.51562
ENSBTAG00000014267	zinc finger, CCHC domain containing 14	ZCCHC14	-0.599691	2.02994	0.0078883	0.0690281	-1.51539
ENSBTAG00000031214	not annotated		-0.597506	2.91786	0.0116435	0.0882078	-1.5131
ENSBTAG00000021830	ectonucleotide pyrophosphatase/phosphodiesterase 1	ENPP1	-0.597224	3.44144	0.00788421	0.0690281	-1.5128
ENSBTAG00000000995	family with sequence similarity 46, member A	FAM46A	-0.596795	4.01255	0.000560846	0.0124582	-1.51235
ENSBTAG00000020767	SH2 domain containing 1B	SH2D1B	-0.596746	3.53876	0.000783979	0.015687	-1.5123
ENSBTAG00000006078	interleukin-15 receptor alpha chain	IL15RA	-0.59673	2.21051	0.0035834	0.0428847	-1.51228
ENSBTAG00000004394	protein kinase (cAMP-dependent, catalytic) inhibitor beta	PKIB	-0.596414	4.65326	0.00321313	0.0398829	-1.51195
ENSBTAG00000000672	family with sequence similarity 105, member A	FAM105A	-0.59619	6.03947	3.17e-07	9.36e-05	-1.51172
ENSBTAG00000019338	interleukin 13 receptor, alpha 1	IL13RA1	-0.595696	6.00831	1.42e-05	0.00130343	-1.5112
ENSBTAG00000002333	HOP homeobox	HOPX	-0.594696	5.21315	3.78e-06	0.000590388	-1.51015
ENSBTAG00000008732	zinc finger CCCH-type containing 12C	ZC3H12C	-0.593312	3.04081	0.000604079	0.013188	-1.50871
ENSBTAG00000006392	tetratricopeptide repeat domain 7B	TTC7B	-0.592883	0.532514	0.00794409	0.0693253	-1.50826
ENSBTAG00000007111	STEAP family member 3	STEAP3	-0.592774	3.3136	0.000551984	0.0123477	-1.50814
ENSBTAG00000018316	zinc finger, MYND-type containing 15	ZMYND15	-0.592739	0.991377	0.000730677	0.014926	-1.50811
ENSBTAG00000019275	chromosome 9 open reading frame 80 ortholog	INIP	-0.591321	4.12569	0.000870874	0.0168422	-1.50663
ENSBTAG00000002348	solute carrier family 4, sodium bicarbonate cotransporter, member 4	SLC4A4	-0.590419	2.85056	0.00657577	0.0622128	-1.50568
ENSBTAG00000013290	dysferlin	DYSF	-0.588928	6.46851	0.00271514	0.0355655	-1.50413
ENSBTAG00000002626	Rho GTPase-activating protein 6 (Rho-type GTPase-activating protein 6) (Rho-type GTPase-activating protein RhoGAPX-1)	ARHGAP6	-0.588853	2.85858	1.8e-06	0.000375942	-1.50405
ENSBTAG00000017056	pyruvate kinase, liver and RBC	PKLR	-0.588759	2.0115	0.000253842	0.00764133	-1.50395
ENSBTAG00000019017	interferon induced transmembrane protein 2 (1-8D)	IFITM1	-0.588333	7.92291	0.000179575	0.00611712	-1.50351
ENSBTAG00000007700	phytanoyl-CoA 2-hydroxylase	PHYH	-0.587962	5.4505	1.28e-05	0.00121405	-1.50312
ENSBTAG00000019115	CDC42 effector protein (Rho GTPase binding) 4	CDC42EP4	-0.586441	4.4209	0.000272279	0.00795306	-1.50154
ENSBTAG00000011545	guanine deaminase	GDA	-0.585682	6.73701	3.08e-05	0.00216049	-1.50075
ENSBTAG00000012774	RAB7B, member RAS oncogene family	RAB7B	-0.585151	3.82449	0.00468087	0.0504454	-1.5002
ENSBTAG00000010463	similar to FLJ44048 protein		0.585195	3.02674	0.000467437	0.011169	1.50024
ENSBTAG00000003155	family with sequence similarity 14, member A	IFI27L2	0.586567	3.36428	0.013948	0.0976973	1.50167
ENSBTAG00000022360	SRY (sex determining region Y)-box 5; similar to SRY (sex determining region Y)-box 5	SOX5	0.587056	2.78298	0.00449239	0.049038	1.50218
ENSBTAG00000035995	tumor necrosis factor, alpha-induced protein 2	TNFAIP2	0.587188	7.119	0.00287648	0.0369178	1.50232
ENSBTAG00000011887	CD22 molecule	CD22	0.588015	8.29035	0.000169552	0.00583828	1.50318
ENSBTAG00000014861	solute carrier family 20 (phosphate transporter), member 2	SLC20A2	0.589997	4.54369	0.00517458	0.0535599	1.50524
ENSBTAG00000042758	Small nucleolar RNA SNORD29	SNORD29	0.593725	0.410605	0.00706639	0.0650149	1.50914
ENSBTAG00000016821	sorting nexin 22	SNX22	0.598919	2.19024	0.00284542	0.0366302	1.51458
ENSBTAG00000006117	FLYWCH-type zinc finger 1	FLYWCH1	0.599227	2.1235	0.0074438	0.0665854	1.51491
ENSBTAG00000039292	adrenergic, alpha-2A-, receptor		0.605013	5.67431	3.69e-05	0.00244509	1.52099
ENSBTAG00000000616	G protein-coupled receptor 161	GPR161	0.605174	0.174236	0.00789967	0.06908	1.52116
ENSBTAG00000010094	chromosome 3 open reading frame 24 ortholog	FANCD2OS	0.608148	0.0328354	0.00250387	0.0335592	1.5243
ENSBTAG00000015297	B-cell scaffold protein with ankyrin repeats 1	BANK1	0.609025	6.46939	4.05e-06	0.000612763	1.52523
ENSBTAG00000019217	Kinesin-like protein KIF13A (Kinesin-like protein RBKIN)	KIF13A	0.61054	5.61933	0.000156681	0.00562502	1.52683
ENSBTAG00000009679	pleckstrin homology domain containing, family G (with RhoGef domain) member 1	PLEKHG1	0.611043	2.26005	0.0107489	0.0841707	1.52736
ENSBTAG00000039969	not annotated		0.613466	0.812763	0.000679027	0.0142807	1.52993
ENSBTAG00000012391	hypothetical protein LOC524749	FAM63B	0.617705	4.15703	0.000803601	0.0159291	1.53443
ENSBTAG00000020523	solute carrier family 10 (sodium/bile acid cotransporter family), member 5	SLC10A5	0.618176	0.766743	0.0014048	0.0230612	1.53493
ENSBTAG00000003920	transglutaminase 1 (K polypeptide epidermal type I, protein-glutamine-gamma-glutamyltransferase)	TGM1	0.618421	0.929025	0.00129922	0.021952	1.53519
ENSBTAG00000008467	HEN1 methyltransferase homolog 1 (Arabidopsis)	HENMT1	0.62059	0.627862	0.00216432	0.0306234	1.5375
ENSBTAG00000012567	telomerase reverse transcriptase	TERT	0.622821	3.33463	0.00472061	0.0507876	1.53988
ENSBTAG00000015666	not annotated		0.623628	1.34784	0.00214515	0.0304299	1.54075
ENSBTAG00000017715	homer homolog 2 (Drosophila)	HOMER2	0.625373	1.70983	0.00431719	0.0478241	1.54261
ENSBTAG00000019497	immunoglobulin-like domain containing receptor 2	ILDR2	0.62705	0.586398	0.00345808	0.0420272	1.5444
ENSBTAG00000020649	class II, major histocompatibility complex, transactivator	CIITA	0.628798	8.15529	4.28e-05	0.00257633	1.54628
ENSBTAG00000005973	oviductal glycoprotein 1, 120kDa	OVGP1	0.630957	1.98423	0.000902477	0.0172065	1.54859
ENSBTAG00000040367	hypothetical LOC784205; ribosomal protein L15		0.631079	3.70703	0.0101208	0.0810675	1.54872
ENSBTAG00000014088	muscleblind-like 3 (Drosophila)	MBNL3	0.631419	2.00106	0.00549722	0.0557444	1.54909
ENSBTAG00000016137	zinc finger protein 608	ZNF608	0.63448	4.12283	8.74e-06	0.000992058	1.55238
ENSBTAG00000004797	TRNA methyltransferase 44 homolog	TRMT44	0.635368	5.13085	0.00147676	0.0238422	1.55333
ENSBTAG00000038974	stathmin-like 3	STMN3	0.637637	2.60518	0.0126108	0.0927026	1.55578
ENSBTAG00000030179	mitogen-activated protein kinase 8 interacting protein 2	MAPK8IP2	0.641856	2.77007	0.000105221	0.00441233	1.56034
ENSBTAG00000046320	chemokine (C-X-C motif) receptor 5	CXCR5/BLR1	0.645318	5.11471	7.4e-05	0.00367979	1.56408
ENSBTAG00000047880	not annotated		0.655456	3.35181	0.000126248	0.00499722	1.57511
ENSBTAG00000012498	paired box 5	PAX5	0.658588	5.31073	8.33e-05	0.0038125	1.57854
ENSBTAG00000001662	hypothetical LOC510183	EHD3	0.667207	7.4777	0.00033964	0.00908519	1.588
ENSBTAG00000000512	syntrophin, alpha 1 (dystrophin-associated protein A1, 59kDa, acidic component)	SNTA1	0.668902	1.73927	0.0122471	0.0908627	1.58986
ENSBTAG00000011337	ankyrin repeat domain 33B	ANKRD33B	0.672725	1.50093	0.000104212	0.0043845	1.59408
ENSBTAG00000008336	hippocalcin	HPCA	0.672876	0.833309	0.00178807	0.0269504	1.59425
ENSBTAG00000010852	butyrophilin, subfamily 2, member A2		0.676842	3.58204	0.00381331	0.0441401	1.59864
ENSBTAG00000015527	myosin ID	MYO1D	0.677662	1.0265	0.000274759	0.00799465	1.59955
ENSBTAG00000004580	membrane-spanning 4-domains, subfamily A, member 1	MS4A1	0.679301	8.30968	7.85e-06	0.000941121	1.60136
ENSBTAG00000017701	cytochrome P450, family 2, subfamily W, polypeptide 1	CYP2W1	0.679447	1.87736	0.00504948	0.0529799	1.60153
ENSBTAG00000015727	interferon gamma inducible protein 47	IRGM	0.680879	7.00719	0.0089679	0.074801	1.60312
ENSBTAG00000012377	enoyl Coenzyme A hydratase domain containing 3	ECHDC3	0.681255	2.62996	0.00381336	0.0441401	1.60353
ENSBTAG00000006490	similar to MHC class II antigen	HLA-DOA	0.683407	6.385	3.93e-05	0.00248216	1.60593
ENSBTAG00000006770	Mdm2, transformed 3T3 cell double minute 2, p53 binding protein (mouse) binding protein, 104kDa	MTBP	0.684214	3.95567	4.17e-05	0.00256706	1.60683
ENSBTAG00000020957	Frizzled class receptor 5	FZD5	0.684254	3.28695	0.00344264	0.0418987	1.60687
ENSBTAG00000031232	not annotated		0.68617	1.55867	0.00412163	0.0461812	1.60901
ENSBTAG00000012854	gasdermin B	GSDMB	0.68865	3.6755	0.000102644	0.00435684	1.61177
ENSBTAG00000037508	early B-cell factor 1	EBF1	0.69202	4.31409	0.000156352	0.00562502	1.61554
ENSBTAG00000020341	mov10l1, Moloney leukemia virus 10-like 1, homolog (mouse)	MOV10L1	0.692735	2.58929	0.0138166	0.097401	1.61634
ENSBTAG00000034368	protease, serine, 33	PRSS33	0.693797	1.32435	0.00768185	0.0677858	1.61753
ENSBTAG00000004885	discoidin domain receptor tyrosine kinase 2	DDR2	0.694864	0.0339697	0.0038733	0.044578	1.61873
ENSBTAG00000045934	G protein-coupled receptor 82	GPR82	0.695041	2.86886	0.000158252	0.00563235	1.61893
ENSBTAG00000040585	nuclear receptor subfamily 6, group A, member 1	NR6A1	0.696278	-0.246023	0.000766779	0.0154132	1.62032
ENSBTAG00000019461	numb homolog (Drosophila)-like	NUMBL	0.697579	3.1056	0.000294069	0.00830321	1.62178
ENSBTAG00000031383	small integral membrane protein 24	SMIM24	0.697885	-0.0746136	0.00846907	0.0723172	1.62213
ENSBTAG00000017063	erythrocyte membrane protein band 4.1 like 4B	EPB41L4B	0.69814	0.441123	0.0104337	0.0823768	1.62241
ENSBTAG00000003580	pleckstrin and Sec7 domain containing	PSD	0.698693	1.31592	6.18e-05	0.00324258	1.62303
ENSBTAG00000018808	solute carrier family 25, member 35	SLC25A35	0.702597	2.14867	1.91e-06	0.000391845	1.62743
ENSBTAG00000000920	dynein, axonemal, heavy chain 17	DNAH17	0.702673	4.83486	1.06e-05	0.00111268	1.62752
ENSBTAG00000011927	retinol dehydrogenase 5 (11-cis/9-cis)	RDH5	0.707487	1.67367	0.000524513	0.0118796	1.63296
ENSBTAG00000044063	UDP-Gal:betaGlcNAc beta 1,4- galactosyltransferase, polypeptide 6	B4GALT6	0.708672	3.57389	0.00126078	0.0215316	1.6343
ENSBTAG00000001293	MYCBP-associated, testis expressed 1	MAATS1	0.711417	0.898925	0.000501504	0.0116139	1.63741
ENSBTAG00000009208	tectonic family member 1	TCTN1	0.721464	5.26252	4.23e-05	0.00256925	1.64885
ENSBTAG00000007851	interleukin 24	IL24	0.724099	3.17185	0.000346502	0.00919135	1.65187
ENSBTAG00000005128	pre-B lymphocyte 3	VPREB3	0.72443	3.04661	0.0136756	0.0969261	1.65225
ENSBTAG00000023780	synaptonemal complex central element protein 1-like	SYCE1L	0.726184	1.52293	0.00651757	0.0617541	1.65426
ENSBTAG00000016343	Kv channel interacting protein 2	KCNIP2	0.726488	0.933619	0.0101753	0.081364	1.65461
ENSBTAG00000039933	leucine rich repeat containing 3C	LRRC3C	0.728713	-0.0164952	0.00106208	0.0193291	1.65716
ENSBTAG00000032122	CD19 molecule	CD19	0.729656	6.85683	0.000113328	0.00463006	1.65824
ENSBTAG00000020890	tripartite motif-containing protein 66 (Transcriptional intermediary factor 1 delta)	TRIM66	0.730632	0.396215	0.0120485	0.0900885	1.65937
ENSBTAG00000005891	Fc receptor-like 1	FCRL1	0.731507	5.59147	2.6e-05	0.00189909	1.66037
ENSBTAG00000043953	Spi-B transcription factor (Spi-1/PU.1 related)		0.733468	6.7341	1.16e-05	0.00115488	1.66263
ENSBTAG00000020003	kelch-like 14 (Drosophila)	KLHL14	0.735836	2.55312	2.65e-05	0.00192616	1.66536
ENSBTAG00000020713	BTB and CNC homology 1, basic leucine zipper transcription factor 2	BACH2	0.737012	4.7955	5.84e-06	0.000798043	1.66672
ENSBTAG00000010978	prospero homeobox 1	PROX1	0.740929	2.23572	0.0011742	0.0204656	1.67125
ENSBTAG00000025812	not annotated		0.741897	4.0045	0.000193903	0.0065006	1.67237
ENSBTAG00000011871	B and T lymphocyte associated	BTLA	0.743862	4.6448	0.00132928	0.0221548	1.67465
ENSBTAG00000014602	calmodulin binding transcription activator 1	CAMTA1	0.743976	1.29244	0.000717922	0.0147604	1.67478
ENSBTAG00000019948	actin filament associated protein 1-like 1	AFAP1L1	0.746167	2.29577	5.97e-05	0.00314614	1.67733
ENSBTAG00000043955	chromosome 7 open reading frame 72	C7ORF72	0.747784	1.03695	0.0143602	0.0999227	1.67921
ENSBTAG00000008816	tripartite motif-containing 2	TRIM2	0.751273	3.53223	0.00422149	0.0470924	1.68328
ENSBTAG00000005019	protease, serine, 50	PRSS50	0.751509	1.71034	0.00165546	0.0257143	1.68355
ENSBTAG00000014541	platelet-derived growth factor alpha polypeptide	PDGFA	0.759122	1.32928	0.000317348	0.00867145	1.69246
ENSBTAG00000044073	CD248 molecule, endosialin	CD248	0.765822	1.23787	0.00836288	0.0716996	1.70034
ENSBTAG00000002477	FtsJ homolog 2 (E. coli)	FTSJ2	0.766264	4.96607	4.51e-07	0.000124579	1.70086
ENSBTAG00000007996	5-hydroxytryptamine receptor 6 (5-HT-6) (Serotonin receptor 6)	HTR6	0.770573	1.24419	0.00134029	0.0222388	1.70595
ENSBTAG00000020080	myosin binding protein C, fast type	MYBPC2	0.781229	1.92442	0.000106451	0.00443466	1.71859
ENSBTAG00000005378	XK, Kell blood group complex subunit-related, X-linked	XKRX	0.781625	1.92205	0.000329788	0.00887542	1.71907
ENSBTAG00000001213	not annotated		0.781861	1.58323	0.00404235	0.0457837	1.71935
ENSBTAG00000021902	aldehyde dehydrogenase 5 family, member A1	ALDH5A1	0.78214	5.85966	0.000356467	0.00937738	1.71968
ENSBTAG00000008576	pleckstrin homology domain containing, family D (with coiled-coil domains) member 1	PLEKHD1	0.782251	3.43773	3.71e-06	0.000590388	1.71981
ENSBTAG00000044204	similar to CD79B antigen	CD79B	0.782785	7.85733	1.79e-06	0.000375942	1.72045
ENSBTAG00000014149	lipocalin 2	LCN2	0.783565	3.85536	0.000119996	0.00479455	1.72138
ENSBTAG00000009216	hydrogen voltage-gated channel 1	HVCN1	0.784296	6.36078	6.07e-06	0.000811499	1.72225
ENSBTAG00000039206	schlafen family member 14	SLFN14	0.785506	2.7072	9.28e-05	0.00410798	1.7237
ENSBTAG00000047996	not annotated	IFITM10	0.78735	3.61108	4.38e-05	0.0026229	1.7259
ENSBTAG00000024947	testicular cell adhesion molecule 1 homolog (mouse)		0.787723	0.973323	0.00026829	0.00789096	1.72635
ENSBTAG00000004035	sidekick homolog 1, cell adhesion molecule (chicken)	SDK1	0.788554	2.35812	0.000107686	0.00447144	1.72734
ENSBTAG00000016446	glutamic-oxaloacetic transaminase 1-like 1	GOT1L1	0.78942	-0.335921	0.0103891	0.0821429	1.72838
ENSBTAG00000014100	BAI1-associated protein 3	BAIAP3	0.789498	1.00274	0.000246121	0.00755366	1.72847
ENSBTAG00000020750	AF4/FMR2 family, member 2	AFF2	0.791873	1.16284	0.0012725	0.0217026	1.73132
ENSBTAG00000009994	echinoderm microtubule associated protein like 5	EML5	0.792531	3.46412	0.000551099	0.0123477	1.73211
ENSBTAG00000034069	mab-21-like 2 (C. elegans); mab-21-like 1 (C. elegans)	MAB21L1	0.792791	0.988429	3.89e-05	0.00248216	1.73242
ENSBTAG00000002035	ADP-ribosylation factor-like 5C	ARL5C	0.804108	4.24273	1.12e-05	0.00114953	1.74607
ENSBTAG00000017564	cingulin	CGN	0.804445	1.98689	1.34e-05	0.00126458	1.74647
ENSBTAG00000047707	major histocompatibility complex, class II, DO beta	HLA-DOB	0.809207	6.25842	4.25e-05	0.00257084	1.75225
ENSBTAG00000002129	Kruppel-like factor 5 (intestinal)	KLF5	0.813093	4.75759	2.23e-06	0.000422733	1.75697
ENSBTAG00000006064	Chromosome 19 open reading frame 57	C19ORF57	0.830807	-0.0844838	0.00407145	0.045821	1.77868
ENSBTAG00000002706	glutathione transferase zeta 1	GSTZ1	0.832191	2.11546	0.00261322	0.0345511	1.78039
ENSBTAG00000046367	not annotated		0.836408	0.815997	6.32e-05	0.00326831	1.7856
ENSBTAG00000024633	phosphatidylinositol-4-phosphate 3-kinase, catalytic subunit type 2 beta	PIK3C2B	0.842424	5.91361	1.43e-05	0.00130343	1.79306
ENSBTAG00000002215	glutamine-fructose-6-phosphate transaminase 2	GFPT2	0.842696	-0.191024	0.00289695	0.0371055	1.7934
ENSBTAG00000007223	F-box protein 2	FBXO2	0.848429	0.393409	0.000282336	0.00805891	1.80054
ENSBTAG00000031582	similar to Transcription elongation factor B polypeptide 2 (RNA polymerase II transcription factor SIII subunit B) (SIII p18) (Elongin B) (EloB) (Elongin 18 kDa subunit)		0.848464	1.34968	0.000495888	0.0115928	1.80058
ENSBTAG00000013569	ecto-NAD+ glycohydrolase; CD38 molecule	CD38	0.857205	5.55753	6.79e-05	0.00344926	1.81153
ENSBTAG00000001739	cadherin 20, type 2	CDH20	0.857576	2.07155	0.000343298	0.00914454	1.81199
ENSBTAG00000004674	-hydroxyanthranilate 3,4-dioxygenase	HAAO	0.85829	1.9814	3.09e-05	0.0021607	1.81289
ENSBTAG00000004588	potassium intermediate/small conductance calcium-activated channel, subfamily N, member 4	KCNN4	0.860181	5.83402	4.57e-05	0.00272552	1.81527
ENSBTAG00000021609	G protein-coupled receptor 110	ADGRF1	0.863348	2.45447	0.000667635	0.0141193	1.81925
ENSBTAG00000003835	bone morphogenetic protein 4	BMP4	0.867497	1.78256	0.000422069	0.010393	1.82449
ENSBTAG00000025903	glycine dehydrogenase (decarboxylating)	GLDC	0.875592	1.37299	0.000700992	0.0145062	1.83476
ENSBTAG00000000462	coiled-coil domain containing 102A	CCDC102A	0.876397	3.17703	9.62e-05	0.00421581	1.83579
ENSBTAG00000016849	poly(A) binding protein, cytoplasmic 1-like	PABPC1L	0.87811	0.982321	0.000187327	0.00633026	1.83797
ENSBTAG00000021964	cadherin 17, LI cadherin (liver-intestine)	CDH17	0.87977	1.52795	0.00610298	0.0599482	1.84008
ENSBTAG00000006086	matrix metallopeptidase 28	MMP28	0.884795	3.43337	1.08e-07	4.74e-05	1.8465
ENSBTAG00000005017	zinc finger protein 169	ZNF169	0.886666	0.578328	0.00069859	0.0144864	1.8489
ENSBTAG00000005170	adhesion G protein-coupled receptor G5	ADGRG5/GPR114	0.894966	5.01009	3.08e-06	0.000516931	1.85957
ENSBTAG00000000945	ATPase, Ca++ transporting, type 2C, member 2	ATP2C2	0.900293	1.11697	0.0132539	0.0953054	1.86644
ENSBTAG00000019947	synaptotagmin VII	SYT7	0.900941	2.32739	0.00708223	0.0650324	1.86728
ENSBTAG00000001303	heat shock 22kDa protein 8	HSPB8	0.905216	0.683418	0.00892916	0.074681	1.87283
ENSBTAG00000046452	not annotated		0.907731	2.0303	6.61e-05	0.00337773	1.87609
ENSBTAG00000017220	growth hormone	GH	0.943853	-0.206703	0.00907672	0.0754577	1.92366
ENSBTAG00000009852	neuron navigator 3	NAV3	0.944708	4.93584	3.78e-06	0.000590388	1.9248
ENSBTAG00000007917	teashirt zinc finger homeobox 2	TSHZ2	0.964697	-0.21935	0.00634145	0.0608109	1.95165
ENSBTAG00000003901	DNA (cytosine-5-)-methyltransferase 3 beta	DNMT3B	0.98018	4.89674	1.63e-07	6.28e-05	1.97271
ENSBTAG00000039341	not annotated		0.98198	1.46386	7.61e-05	0.00367979	1.97517
ENSBTAG00000016429	transmembrane protein 205	TMEM205	0.984989	1.50348	0.0111455	0.0857749	1.9793
ENSBTAG00000018181	coiled-coil domain containing 8	CCDC8	0.985215	-0.0953864	0.00631283	0.0607731	1.97961
ENSBTAG00000017366	growth factor receptor-bound protein 7	GRB7	0.988075	3.50276	0.000111002	0.00456435	1.98354
ENSBTAG00000003200	similar to mCG118705		0.98871	1.65413	8.7e-06	0.000992058	1.98441
ENSBTAG00000015656	WSC domain containing 1	WSCD1	0.99486	2.53119	0.0126808	0.0929728	1.99289
ENSBTAG00000026489	tumor necrosis factor receptor superfamily, member 13C	TNFRSF13C	0.994909	2.53081	0.000279256	0.00805272	1.99296
ENSBTAG00000040559	protein tyrosine phosphatase, receptor type, H	PTPRH	0.998059	1.90741	0.000411301	0.010227	1.99731
ENSBTAG00000013791	free fatty acid receptor 3	GPR41	1.00757	2.67521	0.000101231	0.00431626	2.01052
ENSBTAG00000025161	1-acylglycerol-3-phosphate O-acyltransferase 2 (lysophosphatidic acid acyltransferase, beta)	AGPAT2	1.00768	2.99343	0.000316833	0.00867145	2.01067
ENSBTAG00000033642	not annotated		1.01162	2.12114	0.0092302	0.076453	2.01617
ENSBTAG00000006626	transmembrane protein 132B	TMEM132B	1.01875	1.16379	0.00166089	0.0257671	2.02617
ENSBTAG00000004076	oxoeicosanoid (OXE) receptor 1	OXER1	1.02586	-0.159629	9.81e-05	0.00423238	2.03617
ENSBTAG00000006357	cysteine-rich protein 3	CRIP3	1.03009	2.56961	0.000310373	0.00855446	2.04216
ENSBTAG00000046408	family with sequence similarity 124A	FAM124A	1.0407	0.338219	3.52e-05	0.00237563	2.05722
ENSBTAG00000005556	cytoglobin	CYGB	1.0555	2.67394	0.000167691	0.00582155	2.07843
ENSBTAG00000010532	potassium channel tetramerisation domain containing 11	KCTD11	1.05616	3.92127	1.95e-08	1.18e-05	2.07939
ENSBTAG00000009639	sphingomyelin phosphodiesterase 3, neutral membrane (neutral sphingomyelinase II)	SMPD3	1.05742	1.53287	0.00570483	0.0573009	2.08121
ENSBTAG00000045806	free fatty acid receptor 1	FFAR1	1.05969	1.75807	0.000265207	0.00784272	2.08449
ENSBTAG00000004770	sodium channel, voltage gated, type IV alpha subunit	SCN4A	1.06838	1.55032	0.000166604	0.00582155	2.09708
ENSBTAG00000013078	dynein heavy chain Bv1	DNAH11	1.08275	2.00374	0.00111629	0.0200051	2.11806
ENSBTAG00000032132	elongation factor RNA polymerase II-like 3	ELL3	1.0863	3.86313	7.84e-06	0.000941121	2.12329
ENSBTAG00000016761	NADPH oxidase 1	NOX1	1.10804	0.217462	0.000620576	0.0134328	2.15552
ENSBTAG00000011616	myeloperoxidase	MPO	1.10943	0.100736	0.00260272	0.0345301	2.1576
ENSBTAG00000001049	Kallmann syndrome 1 sequence	ANOS1/KALI1	1.11161	-0.545505	0.00968819	0.0791119	2.16086
ENSBTAG00000045674	interferon beta-1 precursor	INFB1	1.14248	1.21248	0.000345634	0.0091875	2.20761
ENSBTAG00000020203	transmembrane protein 151A	TMEM151A	1.14751	1.10327	0.000133213	0.00517618	2.21532
ENSBTAG00000015539	Rap guanine nucleotide exchange factor (GEF) 5	RAPGEF5	1.16009	0.645322	0.000204921	0.00667804	2.23471
ENSBTAG00000012219	chondroitin sulfate proteoglycan 4	CSPG4	1.16424	2.51009	0.00129034	0.02186	2.24115
ENSBTAG00000004014	fibulin 2	FBLN2	1.18658	0.895185	3.86e-06	0.000590388	2.27613
ENSBTAG00000003763	myosin VC	MYO5C	1.19135	3.89408	0.000112518	0.00461179	2.28367
ENSBTAG00000021626	megalencephalic leukoencephalopathy with subcortical cysts 1	MLC1	1.19609	1.62728	8.45e-08	3.98e-05	2.29119
ENSBTAG00000019355	potassium channel, subfamily K, member 10	KCNK10	1.19771	0.525324	1.78e-07	6.45e-05	2.29376
ENSBTAG00000001580	calmegin	CLGN	1.19878	3.68152	1.94e-06	0.000391851	2.29545
ENSBTAG00000021798	erbB-2	ERBB2	1.20427	6.18252	1.28e-06	0.000296031	2.3042
ENSBTAG00000008626	potassium intermediate/small conductance calcium-activated channel, subfamily N, member 1	KCNN1	1.20705	0.995724	0.00011856	0.00478229	2.30865
ENSBTAG00000005805	epoxide hydrolase 4	EPHX4/ABHD7	1.21096	2.37399	2.78e-08	1.53e-05	2.31492
ENSBTAG00000008943	zinc finger and SCAN domain containing 12	ZSCAN12	1.21152	1.23456	9.78e-05	0.00423238	2.31582
ENSBTAG00000002835	SMAD family member 1	SMAD1	1.23246	-0.395868	0.0026516	0.0349132	2.34967
ENSBTAG00000020824	Keratin 10 (epidermolytic hyperkeratosis; keratosis palmaris et plantaris)	KRT10	1.2392	0.0365504	1.89e-05	0.00153281	2.36068
ENSBTAG00000022158	troponin T type 3 (skeletal, fast)	TNNT3	1.23959	1.44887	0.000167059	0.00582155	2.36131
ENSBTAG00000016867	hydroxysteroid (17-beta) dehydrogenase 3	HSD17B3	1.24643	-0.285131	0.00260892	0.0345301	2.37253
ENSBTAG00000016739	RAS protein activator like 1 (GAP1 like); similar to RasGAP-activating-like protein 1	RASAL1	1.25461	1.83349	0.000521711	0.0118373	2.38603
ENSBTAG00000046649	sphingosine-1-phosphate phosphatase 2	SGPP2	1.27903	0.579379	2.2e-06	0.000422733	2.42676
ENSBTAG00000008158	coiled-coil domain containing 68	CCDC68	1.29473	0.0058339	0.000544618	0.0122694	2.45331
ENSBTAG00000045635	not annotated		1.35448	-0.756699	0.0101257	0.0810675	2.55705
ENSBTAG00000012111	PR domain containing 5	PRDM5	1.36451	-0.493063	0.000186624	0.00632333	2.57488
ENSBTAG00000007650	solute carrier family 38, member 11	SLC38A11	1.45469	-0.49029	0.0139035	0.0975769	2.74098
ENSBTAG00000047684	not annotated		1.4709	0.00321099	0.00730649	0.0661102	2.77194
ENSBTAG00000003152	similar to putative ISG12(a) protein	IFI27	1.47758	3.90574	0.0030045	0.0381269	2.78481
ENSBTAG00000004488	meiosis inhibitor 1	MEI1	1.50175	1.2958	0.000651527	0.0139365	2.83187
ENSBTAG00000015565	similar to MHC class II antigen	DSB	1.53956	1.74677	1.15e-07	4.86e-05	2.90706
ENSBTAG00000015197	kelch domain containing 8A	KLHDC8A	1.54164	2.03591	1.55e-05	0.00138262	2.91126
ENSBTAG00000039041	not annotated		1.55704	4.96877	4.77e-09	3.79e-06	2.9425
ENSBTAG00000020116	MHC Class I JSP.1	JSP.1	1.55894	10.0668	1.25e-09	1.44e-06	2.94638
ENSBTAG00000004982	glycosylphosphatidylinositol specific phospholipase D1	GPLD1	1.57786	1.699	0.00143108	0.0233419	2.98527
ENSBTAG00000046793	not annotated		1.60528	-0.753063	1.26e-05	0.00121405	3.04255
ENSBTAG00000021777	double C2-like domain-containing protein gamma	DOC2G	1.61579	3.10528	1.03e-10	1.46e-07	3.06479
ENSBTAG00000012222	fatty acid 2-hydroxylase	FA2H	1.65884	-0.569508	3.09e-06	0.000516931	3.15763
ENSBTAG00000004653	adhesion G protein-coupled receptor A3	ADGRA3/GPR125	1.69664	1.81693	1.87e-07	6.6e-05	3.24145
ENSBTAG00000012023	Glutathione peroxidase 6	GPX6	1.75967	-0.42843	4.97e-05	0.00284576	3.38621
ENSBTAG00000047473	not annotated		1.76353	1.14293	0.000320758	0.00874582	3.39528
ENSBTAG00000002850	HEAT repeat containing 9	HEATR9	1.78783	-0.329799	2.08e-05	0.00165018	3.45296
ENSBTAG00000020285	proteoglycan 3		1.83639	-0.180179	0.00112996	0.0201082	3.57115
ENSBTAG00000006035	protein phosphatase 1, regulatory (inhibitor) subunit 1B	PPP1R1B	1.93881	5.6829	2.73e-06	0.000481417	3.83389
ENSBTAG00000000603	junctional adhesion molecule 2	JAM2	1.99615	0.372801	0.000315565	0.00866983	3.98934
ENSBTAG00000018432	solute carrier family 6 (neutral amino acid transporter), member 15	SLC6A15	2.30238	0.285298	0.00027124	0.00794095	4.9327
ENSBTAG00000025642	ryanodine receptor 3	RYR3	2.44157	3.17347	2.27e-05	0.00174892	5.43233
ENSBTAG00000009836	chromogranin A (parathyroid secretory protein 1)	CHGA	2.52476	0.0909077	3.39e-19	2.16e-15	5.75479
ENSBTAG00000004948	family with sequence similarity 84, member A	FAM84A	2.57567	2.79095	0.00016544	0.00580685	5.96147
ENSBTAG00000046595	not annotated		2.5786	-0.873105	0.0126717	0.0929597	5.97361
ENSBTAG00000039037	serine (or cysteine) proteinase inhibitor, clade B; serpin peptidase inhibitor, clade B (ovalbumin), member 4	SERPINB4	2.71686	1.64919	0.000759982	0.0153275	6.57439
ENSBTAG00000040586	serine (or cysteine) proteinase inhibitor, clade B; serpin peptidase inhibitor, clade B (ovalbumin), member 4; similar to serpin peptidase inhibitor, clade B like		2.89379	-0.134834	0.00170509	0.0262287	7.43219
ENSBTAG00000006349	exostoses (multiple)-like 1	EXTL1	2.95237	0.790176	1.13e-12	3.6e-09	7.74017
ENSBTAG00000035224	not annotated		3.29509	-1.01868	0.00181006	0.0271903	9.81569
ENSBTAG00000038652	similar to LOC510193 protein; similar to Apolipoprotein L, 3		3.73026	5.10572	7.71e-06	0.000941121	13.2715
