# Supplementary material for: Characterisation of the Whole Blood mRNA Transcriptome in Holstein-Friesian and Jersey Calves in Response to Gradual Weaning
Source: PLoS One. 2016 Aug 1;11(8):e0159707. doi: 10.1371/journal.pone.0159707 (PMC4968839; doi:10.1371/journal.pone.0159707)
Supplement: S2 Table — (XLSX) [file pone.0159707.s002.xlsx]

## Sheet: Supplementary Table 5.2
S2 Table. Differentially expressed genes between Holstein-Friesian and Jersey calves at day 1, relative to weaning (P < 0.05; FDR < 0.1; fold change > 0.05)
ID	Gene names	Gene symbol	logFC	logCPM	PValue	FDR	Fold Change
ENSBTAG00000031825	hypothetical LOC786987		-5.303	0.749627	3.49e-07	0.00011365	-39.4785
ENSBTAG00000021565	protease, serine, 2 (trypsin 2)	PRSS2	-5.2765	4.37062	1.06e-12	3.36e-09	-38.7601
ENSBTAG00000004757	latent transforming growth factor beta binding protein 4	LTBP4	-3.80105	2.06069	0.000133171	0.00659828	-13.939
ENSBTAG00000004247	rabphilin 3A homolog (mouse)	RPH3A	-3.52204	-0.10906	0.00011728	0.00610998	-11.4879
ENSBTAG00000032007	Low-density lipoprotein receptor-related protein 11	LRP11	-3.07597	0.237576	6.42e-05	0.00419588	-8.43254
ENSBTAG00000007772	solute carrier family 29 (nucleoside transporters), member 4	SLC29A4	-2.78009	0.962731	0.00283094	0.038393	-6.86894
ENSBTAG00000039682	mitochondrial tumor suppressor 1	MTUS1	-2.57734	1.93553	1.28e-08	8.11e-06	-5.9684
ENSBTAG00000045895	neurofascin	NFASC	-2.42967	-0.79855	0.000862791	0.0192332	-5.38769
ENSBTAG00000000930	not annotated		-2.39278	1.16366	7.58e-08	3.11e-05	-5.25168
ENSBTAG00000001476	similar to MHC class I antigen		-2.3205	4.57044	0.000411878	0.0122835	-4.99504
ENSBTAG00000017895	C-type lectin domain family 10, member A	CLEC10A	-2.26759	-0.368278	1.7e-09	1.8e-06	-4.8152
ENSBTAG00000037644	hemoglobin, gamma; hemoglobin, gamma 2; hemoglobin, beta		-1.93994	-0.332657	0.00266346	0.0372708	-3.83689
ENSBTAG00000002786	similar to Myeloid-associated differentiation marker		-1.90642	5.78034	0.00150355	0.0266075	-3.74878
ENSBTAG00000000570	ret proto-oncogene	RET	-1.86112	2.67747	2.48e-11	5.25e-08	-3.63289
ENSBTAG00000009012	pentraxin-related gene, rapidly induced by IL-1 beta	PTX3	-1.86042	0.9284	0.00198769	0.0315159	-3.63113
ENSBTAG00000000795	nicotinamide nucleotide adenylyltransferase 2	NMNAT2	-1.81661	1.77881	0.000540784	0.0146508	-3.52252
ENSBTAG00000015994	leucine rich repeat containing 63	LRRC63	-1.79386	0.7879	3.28e-07	0.000109783	-3.46741
ENSBTAG00000038698	similar to ATP-binding cassette transporter C4		-1.67907	1.81486	0.00615143	0.0612095	-3.20221
ENSBTAG00000047914	cadherin-related family member 5 precursor	MUPCDH	-1.66176	1.46663	0.00642088	0.062351	-3.16402
ENSBTAG00000030424	C-type lectin domain family 1, member A	CLEC1A	-1.63955	1.65636	9.56e-06	0.00120246	-3.11568
ENSBTAG00000014975	solute carrier family 4, anion exchanger, member 3	SLC4A3	-1.60347	0.788066	0.000212727	0.00849207	-3.03874
ENSBTAG00000000585	lymphocyte antigen 6 complex, locus G6C	LY6G6C	-1.59321	4.33924	3.14e-06	0.000556483	-3.01719
ENSBTAG00000003781	myeloproliferative leukemia virus oncogene	MPL	-1.55631	0.0392272	7.74e-07	0.000218508	-2.94102
ENSBTAG00000015241	epoxide hydrolase 2, cytoplasmic; similar to epoxide hydrolase 2, cytoplasmic	EPHX2	-1.51877	1.23048	0.00111573	0.0225381	-2.86547
ENSBTAG00000007173	platelet-derived growth factor receptor, alpha polypeptide	PDGFRA	-1.51204	1.17037	0.00125018	0.0240678	-2.85212
ENSBTAG00000018778	transmembrane channel-like 1	TMC1	-1.48056	-0.118606	0.000201085	0.00826858	-2.79057
ENSBTAG00000006019	hypothetical LOC618158	FAM178B	-1.47985	0.192381	0.00491797	0.0534084	-2.78919
ENSBTAG00000007312	CD209 molecule	CD2 9	-1.4438	1.12991	0.00232522	0.0345381	-2.72037
ENSBTAG00000034384	Von Willebrand factor A domain containing 3B	VWA3B	-1.44118	1.45407	2.55e-06	0.000530479	-2.71543
ENSBTAG00000038288	killer cell immunoglobulin-like receptor, two domains, short cytoplasmic tail, 1	KIR2SL1	-1.41435	0.912708	2.39e-05	0.00245097	-2.66539
ENSBTAG00000007904	keratin 72	KRT72	-1.41329	1.19886	0.000103322	0.00573279	-2.66344
ENSBTAG00000006485	triggering receptor expressed on myeloid cells-like 1	TREML1	-1.39077	2.38852	5.75e-05	0.00393127	-2.62219
ENSBTAG00000008028	chimerin 1	CHN1	-1.37927	-0.233637	0.0063393	0.0619745	-2.60137
ENSBTAG00000003454	regulator of G-protein signaling 20	RGS2	-1.35784	3.68016	3.2e-06	0.000557154	-2.563
ENSBTAG00000027327	osteoclast stimulatory transmembrane protein	OCSTAMP	-1.28165	-0.146493	0.00146198	0.0262371	-2.43117
ENSBTAG00000045751	not annotated		-1.26325	4.42332	0.00409253	0.0481478	-2.40037
ENSBTAG00000011961	platelet factor 4	PF4	-1.25945	8.27604	1.64e-05	0.00178459	-2.39405
ENSBTAG00000002885	macrophage scavenger receptor 1	MSR1	-1.2416	3.4194	4.81e-06	0.00076381	-2.3646
ENSBTAG00000020657	FAT tumor suppressor homolog 1 (Drosophila)	FAT1	-1.23994	2.47484	0.0110349	0.0852264	-2.36189
ENSBTAG00000014011	tropomodulin 2 (neuronal)	TMOD2	-1.23448	-0.516187	3.09e-05	0.0027458	-2.35297
ENSBTAG00000013203	glycoprotein V (platelet)	GP5	-1.23161	-0.0566355	0.00710809	0.0659718	-2.3483
ENSBTAG00000039504	not annotated		-1.22494	2.15386	0.000270047	0.0098113	-2.33745
ENSBTAG00000017045	fatty acid binding protein 2, intestinal	FABP2	-1.19043	0.0789317	0.0101915	0.0814937	-2.2822
ENSBTAG00000012991	prune homolog 2 (Drosophila)	PRUNE2	-1.18274	0.22778	1.22e-05	0.00144727	-2.27007
ENSBTAG00000038843	NKG2C protein	NKG2C	-1.18066	0.545108	0.00761869	0.0688499	-2.26681
ENSBTAG00000001725	chemokine (C-X-C motif) ligand 10	CXCL10	-1.17894	3.07208	2.46e-05	0.00245662	-2.2641
ENSBTAG00000039524	similar to MGC152498 protein		-1.17383	3.78738	0.0144775	0.0997023	-2.2561
ENSBTAG00000009737	leukotriene C4 synthase	LTC4S	-1.16796	1.67349	0.000603775	0.0154981	-2.24694
ENSBTAG00000048226	not annotated		-1.16361	0.773819	0.00622404	0.0613728	-2.24017
ENSBTAG00000013525	chromosome 6 open reading frame 25	C6ORF25	-1.1501	7.94	2.99e-06	0.000556483	-2.21929
ENSBTAG00000007421	cadherin 5, type 2 (vascular endothelium)	CDH5	-1.14607	0.0620921	0.000335887	0.0110278	-2.2131
ENSBTAG00000039932	hypothetical protein LOC100139209; leukocyte immunoglobulin-like receptor, subfamily A (with TM domain), member 4		-1.14171	3.00433	9.23e-05	0.00530437	-2.20642
ENSBTAG00000007450	complement factor B	C2	-1.13353	6.22217	0.000996812	0.0211574	-2.19395
ENSBTAG00000012208	MHC class I heavy chain		-1.11756	6.35464	1.16e-05	0.00139481	-2.16979
ENSBTAG00000007191	chemokine (C-C motif) ligand 5	CCL5	-1.11599	5.08445	8.61e-09	6.07e-06	-2.16744
ENSBTAG00000005841	not annotated		-1.11499	4.9947	1.13e-08	7.58e-06	-2.16593
ENSBTAG00000012030	tubulin tyrosine ligase-like family, member 1	TTLL1	-1.11268	4.67245	0.00198529	0.0315159	-2.16246
ENSBTAG00000013496	carboxypeptidase M	CPM	-1.10802	3.69925	5.85e-06	0.00087432	-2.1555
ENSBTAG00000016208	transglutaminase 2 (C polypeptide, protein-glutamine-gamma-glutamyltransferase)	TGM2	-1.09131	4.19227	8.57e-06	0.0011117	-2.13067
ENSBTAG00000007720	similar to NKG2-A/NKG2-B type II integral membrane protein (NKG2-A/B-activating NK receptor) (NK cell receptor A) (CD159a antigen)	NKG2A	-1.08994	2.08274	0.000284557	0.0100712	-2.12865
ENSBTAG00000002938	cadherin-like and PC-esterase domain containing 1	CPED1	-1.07784	1.26676	0.000208668	0.00839029	-2.11088
ENSBTAG00000006549	family with sequence similarity 26, member F	FAM26F	-1.07071	2.91197	6.26e-06	0.000913792	-2.10047
ENSBTAG00000002069	MHC class I heavy chain	BOLA	-1.06704	10.7901	4.27e-18	5.43e-14	-2.09513
ENSBTAG00000030071	Bta-mir-24-2	bta-mir-24-2	-1.04204	0.233583	0.0110474	0.0852264	-2.05914
ENSBTAG00000023416	protein phosphatase 2 (formerly 2A), regulatory subunit B'', alpha	PPP2R3A	-1.03582	2.85555	0.00440707	0.0503111	-2.05028
ENSBTAG00000005574	clusterin	CLU	-1.03093	5.58683	0.000257999	0.00950185	-2.04334
ENSBTAG00000014497	G protein-coupled receptor 31	GPR31	-1.02657	-0.457624	0.00627607	0.0616258	-2.03718
ENSBTAG00000023186	mitochondrial ribosomal protein S17		-1.01405	0.406431	0.000208503	0.00839029	-2.01957
ENSBTAG00000038706	metallothionein 1E	MT1E	-1.01309	-0.502234	0.0135407	0.096164	-2.01823
ENSBTAG00000025250	chemokine (C-C motif) ligand 3	CCL3 (annotated CCL3L3 in IPA)	-1.00773	1.83697	4.15e-05	0.00331292	-2.01075
ENSBTAG00000012855	lipoprotein lipase	LPL	-1.00556	5.02296	3.17e-05	0.00278034	-2.00772
ENSBTAG00000017810	EF-hand domain (C-terminal) containing 1	EFHC1	-1.00434	0.570992	0.00187694	0.0304966	-2.00603
ENSBTAG00000008483	calcitonin receptor-like	CALCRL	-0.997731	4.73132	1.48e-10	2.35e-07	-1.99686
ENSBTAG00000010146	plexin B3	PLXNB3	-0.97937	0.200465	0.00113588	0.0227283	-1.9716
ENSBTAG00000039555	cytochrome c oxidase subunit VIIc	COX7C	-0.978561	3.6247	5.01e-09	4.54e-06	-1.9705
ENSBTAG00000004608	similar to Myeloid cell surface antigen CD33 precursor (Sialic acid-binding Ig-like lectin 3) (Siglec-3) (gp67)		-0.976734	3.58938	0.000151469	0.00712801	-1.96801
ENSBTAG00000006343	interleukin 1 receptor, type II	IL1R2	-0.974799	2.48132	0.000640993	0.0158761	-1.96537
ENSBTAG00000020729	dehydrogenase/reductase (SDR family) member 7	DHRS7	-0.973014	4.78136	3.97e-12	1.01e-08	-1.96294
ENSBTAG00000015837	purinergic receptor P2Y, G-protein coupled, 12	P2RY12	-0.971444	3.74682	0.00859226	0.0732215	-1.9608
ENSBTAG00000024426	protein phosphatase 1, regulatory (inhibitor) subunit 9A	PPP1R9A	-0.967028	1.75884	0.000472873	0.0133222	-1.95481
ENSBTAG00000017328	spleen trypsin inhibitor; pancreatic trypsin inhibitor	PTI	-0.956892	8.95488	0.00107704	0.0221069	-1.94112
ENSBTAG00000046090	not annotated		-0.954749	2.7349	0.00627255	0.0616258	-1.93824
ENSBTAG00000020178	arylsulfatase family, member K	ARSK	-0.954419	-0.0615454	0.000163325	0.00737583	-1.9378
ENSBTAG00000011137	MORN repeat containing 4	MORN4	-0.947667	1.3352	0.000302093	0.0104454	-1.92875
ENSBTAG00000011037	RNA binding protein with multiple splicing 2	RBPMS2	-0.946166	0.756098	0.000417633	0.0123406	-1.92675
ENSBTAG00000013366	nuclear receptor interacting protein 3	NRIP3	-0.935411	2.27518	0.000620453	0.01558	-1.91244
ENSBTAG00000030973	tubulin, alpha 3c	TUBA1D	-0.929897	-0.160289	0.00088511	0.0196612	-1.90514
ENSBTAG00000047175	glycoprotein VI (platelet)	GP6	-0.925081	2.44978	0.000243782	0.00918799	-1.89879
ENSBTAG00000007181	kinesin family member C3	KIFC3	-0.924864	3.98734	0.000134169	0.00660756	-1.8985
ENSBTAG00000027205	PiggyBac transposable element-derived protein 5	PGBD5	-0.924474	0.359895	0.00173745	0.0290475	-1.89799
ENSBTAG00000006288	chromosome 10 open reading frame 72	VSTM4	-0.919661	-0.216644	0.0109735	0.0849143	-1.89167
ENSBTAG00000021958	granzyme A (granzyme 1, cytotoxic T-lymphocyte-associated serine esterase 3)	GZMA	-0.915194	4.36889	3.13e-06	0.000556483	-1.88582
ENSBTAG00000008291	protein C receptor, endothelial (EPCR)	PROCR	-0.909782	2.13943	0.0126805	0.0924771	-1.87876
ENSBTAG00000013452	aquaporin 9	AQP9	-0.909141	2.48836	1.55e-07	5.7e-05	-1.87793
ENSBTAG00000011882	solute carrier family 24 (sodium/potassium/calcium exchanger), member 3	SLC24A3	-0.904564	2.93506	1.68e-06	0.000395754	-1.87198
ENSBTAG00000011182	PDZ and LIM domain 1	PDLIM1	-0.890777	5.2092	0.000818117	0.0188226	-1.85417
ENSBTAG00000005738	ATPase, class I, type 8B, member 1	ATP8B1	-0.88933	0.120442	0.000695896	0.0167372	-1.85232
ENSBTAG00000039813	granzyme B (granzyme 2, cytotoxic T-lymphocyte-associated serine esterase 1)	GZMB	-0.883939	3.91388	0.000605402	0.0155085	-1.84541
ENSBTAG00000004869	coxsackie virus and adenovirus receptor	CXADR	-0.878795	-0.054129	0.00022881	0.00878325	-1.83884
ENSBTAG00000003528	similar to EGF-like module-containing mucin-like hormone receptor-like 2 precursor (EGF-like module EMR2) (CD312 antigen)		-0.872724	0.888795	0.00202744	0.0318426	-1.83112
ENSBTAG00000033727	RNA binding protein with multiple splicing	RBPMS	-0.871948	1.67513	6.92e-05	0.00433172	-1.83013
ENSBTAG00000037578	similar to protease-2		-0.871522	3.29984	0.00160272	0.0273345	-1.82959
ENSBTAG00000009812	chemokine (C-X-C motif) ligand 5/6 - not annotated properly yet	CXCL6 (annotated CXCL5 in IPA)	-0.870116	0.51253	0.00100621	0.021167	-1.82781
ENSBTAG00000017574	lamin A/C	LMNA	-0.861413	4.15281	0.00192777	0.0309115	-1.81682
ENSBTAG00000003289	C-C motif chemokine 3	CCL3	-0.860349	0.207007	0.00709428	0.06594	-1.81548
ENSBTAG00000045588	not annotated		-0.859845	3.75369	0.0111086	0.0854395	-1.81484
ENSBTAG00000019612	ribonuclease, RNase A family, 4	RNASE4	-0.859362	5.87452	3.34e-06	0.000573149	-1.81424
ENSBTAG00000032425	pro-platelet basic protein (chemokine (C-X-C motif) ligand 7)	PPBP	-0.858637	4.40377	0.00181887	0.0297236	-1.81332
ENSBTAG00000019741	complement component 3a receptor 1	C3AR1	-0.858135	3.41328	0.00177678	0.0293192	-1.81269
ENSBTAG00000009873	neuritin 1	NRN1	-0.853866	3.24285	9.42e-05	0.00536657	-1.80734
ENSBTAG00000007431	cell migration inducing protein, hyaluronan binding	CEMIP	-0.851143	1.06718	0.0130597	0.0941592	-1.80393
ENSBTAG00000033748	interleukin 18 receptor accessory protein	IL18RAP	-0.848473	3.03293	0.00132734	0.0248382	-1.80059
ENSBTAG00000002006	thrombospondin 1	THBS1	-0.848115	5.42518	0.00313056	0.0411344	-1.80015
ENSBTAG00000039892	not annotated		-0.847307	2.76569	0.00322202	0.0418172	-1.79914
ENSBTAG00000045842	not annotated		-0.842984	0.332997	0.0108833	0.0846335	-1.79376
ENSBTAG00000019181	BAI1-associated protein 2-like 1	BAIAP2L1	-0.841755	-0.36243	0.00365137	0.0449418	-1.79223
ENSBTAG00000046409	early growth response 2	EGR2	-0.841608	2.48829	0.00010304	0.00573279	-1.79205
ENSBTAG00000017661	regulatory factor X, 2 (influences HLA class II expression)	RFX2	-0.839485	3.46408	6.88e-06	0.000982114	-1.78941
ENSBTAG00000004443	not annotated		-0.839298	4.03064	0.00708359	0.065937	-1.78918
ENSBTAG00000006338	v-myc avian myelocytomatosis viral oncogene lung carcinoma derived homolog	MYCL	-0.8387	0.393107	0.00754029	0.0682385	-1.78844
ENSBTAG00000019348	not annotated		-0.835567	5.03706	0.000289199	0.0102071	-1.78456
ENSBTAG00000022461	septin 10	SEP10	-0.833975	0.365035	0.00410046	0.0481966	-1.78259
ENSBTAG00000001001	ankyrin repeat domain 55; similar to ankyrin repeat domain 55	ANKRD55	-0.832396	0.250818	0.00343771	0.0435489	-1.78064
ENSBTAG00000010801	carboxymethylenebutenolidase homolog (Pseudomonas)	CMBL	-0.831314	4.30038	1.57e-07	5.7e-05	-1.77931
ENSBTAG00000011002	coiled-coil domain containing 136	CCDC136	-0.823028	2.37726	0.011916	0.0886965	-1.76912
ENSBTAG00000021829	GM2 ganglioside activator	GM2A	-0.822434	5.08972	1.01e-06	0.000280258	-1.76839
ENSBTAG00000020554	allograft inflammatory factor 1	AIF1	-0.821919	6.98978	1.2e-07	4.75e-05	-1.76776
ENSBTAG00000020481	glucoside xylosyltransferase 2	GXYLT2	-0.817091	0.812009	0.00355973	0.0442563	-1.76185
ENSBTAG00000010082	alpha 1 type XV collagen	COL15A1	-0.815266	2.32582	0.00141741	0.0258388	-1.75962
ENSBTAG00000008870	potassium voltage-gated channel, delayed-rectifier, subfamily S, member 1	KCNS1	-0.814606	-0.372528	0.00424925	0.0491721	-1.75882
ENSBTAG00000010238	leukotriene B4 receptor	LTB4R	-0.814521	1.72057	7.78e-05	0.00473198	-1.75871
ENSBTAG00000016549	leucine rich repeat containing 16A	LRRC16A	-0.806223	1.25079	0.000686778	0.0165582	-1.74863
ENSBTAG00000011019	hypothetical LOC618367		-0.805457	5.78207	0.00067688	0.0165076	-1.7477
ENSBTAG00000003510	multimerin 2	MMRN2	-0.794519	-0.20811	0.00190349	0.0307415	-1.7345
ENSBTAG00000038955	Lymphocyte antigen 6 complex, locus G6D		-0.793406	0.130229	0.0124265	0.0911612	-1.73316
ENSBTAG00000001537	tsukushin	TSKU	-0.789737	1.56064	0.00145655	0.0262371	-1.72876
ENSBTAG00000002027	hypothetical LOC617897	FAM167B	-0.787396	0.841664	0.00224318	0.0340118	-1.72596
ENSBTAG00000003915	acheron; La ribonucleoprotein domain family, member 6	LARP6	-0.787207	0.867599	0.0143451	0.0990056	-1.72573
ENSBTAG00000015743	guanosine monophosphate reductase	GMPR	-0.784828	2.13415	0.00498938	0.0537247	-1.72289
ENSBTAG00000014127	prostaglandin-endoperoxide synthase 2 (prostaglandin G/H synthase and cyclooxygenase)	PGHS-2	-0.780915	2.18789	0.0072435	0.0664519	-1.71822
ENSBTAG00000043224	small nucleolar RNA SNORD95	SNORD95	-0.777644	-0.23009	0.00679512	0.0643939	-1.71433
ENSBTAG00000020542	Src homology 2 domain containing E	SHE	-0.766537	0.333862	0.00526717	0.0558381	-1.70118
ENSBTAG00000010155	regakine 1		-0.766162	2.56747	0.00923521	0.0763452	-1.70074
ENSBTAG00000001793	hydroxysteroid (11-beta) dehydrogenase 1-like	HSD11B1L	-0.764267	1.42003	0.000168331	0.00747836	-1.69851
ENSBTAG00000001497	muscle RAS oncogene homolog	MRAS	-0.763991	2.78195	4.05e-06	0.000659094	-1.69818
ENSBTAG00000035654	similar to Dynein light chain Tctex-type 1 (T-complex testis-specific protein 1 homolog) (Protein CW-1)		-0.76309	3.30591	6.84e-05	0.0043014	-1.69712
ENSBTAG00000046337	tubulin, beta 6 class V	TUBB6	-0.762309	3.17775	0.000396147	0.0120579	-1.6962
ENSBTAG00000039197	solute carrier family 2 (facilitated glucose transporter), member 9	SLC2A9	-0.757502	4.37774	0.000252758	0.00937942	-1.69056
ENSBTAG00000015434	destrin (actin depolymerizing factor)	DSTN	-0.756488	3.96756	0.00496682	0.0536368	-1.68937
ENSBTAG00000018438	Ras-related GTP binding D	RRAGD	-0.754467	0.244025	0.007665	0.0689915	-1.68701
ENSBTAG00000045492	angiogenin, ribonuclease, RNase A family, 5	ANG	-0.75148	4.97559	0.00022951	0.00878359	-1.68352
ENSBTAG00000021616	serine protease 1-like protein 1 precursor	PRSS57	-0.750629	1.27223	0.000244415	0.00918799	-1.68253
ENSBTAG00000007286	similar to histone cluster 1, H2ad		-0.746743	-0.0509699	0.00779	0.0694594	-1.678
ENSBTAG00000004472	TCTEL1 protein	DYNLT1	-0.742079	6.17583	2.83e-05	0.00260764	-1.67258
ENSBTAG00000004043	Fc gamma 2 receptor		-0.734922	7.38979	2.43e-06	0.000514564	-1.66431
ENSBTAG00000012718	X-linked Kx blood group (McLeod syndrome)	XK	-0.734285	0.763857	0.00557643	0.057749	-1.66357
ENSBTAG00000020990	purinergic receptor P2Y, G-protein coupled, 14	P2RY14	-0.725418	0.709619	0.013181	0.0946737	-1.65338
ENSBTAG00000007870	FK506 binding protein 14, 22 kDa	FKBP14	-0.724254	3.71412	0.00155808	0.0269939	-1.65205
ENSBTAG00000006392	tetratricopeptide repeat domain 7B	TTC7B	-0.723308	0.532514	0.00115388	0.0228725	-1.65096
ENSBTAG00000001814	plexin D1	PLXND1	-0.722772	5.63013	0.000310684	0.0105268	-1.65035
ENSBTAG00000002699	v-kit Hardy-Zuckerman 4 feline sarcoma viral oncogene homolog	KIT	-0.722064	4.60218	4.36e-05	0.00345359	-1.64954
ENSBTAG00000019670	succinate receptor 1	SUCNR1	-0.721608	2.29717	0.000457982	0.0131085	-1.64902
ENSBTAG00000027444	supervillin	SVIL	-0.718226	5.91493	9.59e-05	0.00544038	-1.64516
ENSBTAG00000004722	THUMP domain containing 2	THUMPD2	-0.717851	3.08505	3.82e-05	0.00312792	-1.64473
ENSBTAG00000047904	not annotated		-0.717666	4.07422	0.00100042	0.021167	-1.64452
ENSBTAG00000002845	cadherin 10, type 2	CDH1	-0.716653	3.95134	0.0131188	0.0943768	-1.64337
ENSBTAG00000030749	DNAJC6 protein; DnaJ (Hsp40) homolog, subfamily C, member 6	DNAJC6	-0.715417	1.08309	0.00107442	0.0221069	-1.64196
ENSBTAG00000010303	intercellular adhesion molecule 1	ICAM1	-0.713248	1.69542	0.00183247	0.0298504	-1.63949
ENSBTAG00000046981	supervillin	SVIL	-0.7118	5.80271	2.7e-06	0.000536707	-1.63785
ENSBTAG00000014546	C-type lectin domain family 7, member A	CLEC7A	-0.711605	2.60119	0.0128212	0.0930543	-1.63762
ENSBTAG00000017685	junction plakoglobin	JUP	-0.708786	1.6529	0.0142663	0.0986759	-1.63443
ENSBTAG00000012815	C-type lectin domain family 12, member A	CLEC12A	-0.708703	6.43179	0.000368526	0.011648	-1.63433
ENSBTAG00000010068	receptor accessory protein 2	REEP2	-0.70621	4.21244	0.00024621	0.00922102	-1.63151
ENSBTAG00000006921	ATP-binding cassette, sub-family A (ABC1), member 6	ABCA6	-0.702464	6.03386	0.00122267	0.0238637	-1.62728
ENSBTAG00000002100	granzyme M (lymphocyte met-ase 1)	GZMM	-0.698221	2.12061	0.00233113	0.0345381	-1.6225
ENSBTAG00000003196	3'-phosphoadenosine 5'-phosphosulfate synthase 2	PAPSS2	-0.696508	6.08342	5.64e-09	4.78e-06	-1.62058
ENSBTAG00000047776	not annotated		-0.686712	3.01221	0.00138648	0.0255313	-1.60961
ENSBTAG00000016152	disabled homolog 2, mitogen-responsive phosphoprotein (Drosophila)	DAB2	-0.686089	2.06505	0.0112042	0.085708	-1.60892
ENSBTAG00000019822	tubulin polymerization-promoting protein family member 3	TPPP3	-0.683638	5.88493	0.00029786	0.0103973	-1.60618
ENSBTAG00000005078	ubiquitin carboxyl-terminal esterase L1 (ubiquitin thiolesterase)	UCHL1	-0.679979	2.45861	0.00225716	0.0341422	-1.60212
ENSBTAG00000007275	triggering receptor expressed on myeloid cells 2	TREM2	-0.676275	4.54668	0.00596345	0.0602837	-1.59801
ENSBTAG00000021953	like-glycosyltransferase; like-glycosyltransferase	LARGE	-0.675695	2.02967	0.000119388	0.00619163	-1.59737
ENSBTAG00000026944	not annotated		-0.675488	3.96539	0.0125043	0.0915735	-1.59714
ENSBTAG00000007994	organic solute carrier protein 1	OSCP1	-0.673519	1.1555	0.004977	0.0536368	-1.59496
ENSBTAG00000000672	hypothetical LOC534389	MGC1432 9	-0.673283	6.03947	8.26e-09	6.07e-06	-1.5947
ENSBTAG00000003607	similar to family with sequence similarity 20, member C	FAM2 C	-0.672611	2.30924	0.00368915	0.0450715	-1.59396
ENSBTAG00000011582	serine incorporator 2	SERINC2	-0.67196	4.51923	0.000766336	0.0180986	-1.59324
ENSBTAG00000048155	ficolin-2	FCN2	-0.669654	9.56315	0.0100112	0.0806099	-1.59069
ENSBTAG00000003806	extracellular matrix protein 1	ECM1	-0.669363	6.15995	0.00209661	0.0326464	-1.59037
ENSBTAG00000016357	vanin 2	VNN2	-0.667604	8.4168	2.32e-05	0.00243427	-1.58843
ENSBTAG00000020602	indoleamine 2,3-dioxygenase 1	IDO1	-0.663956	7.12184	0.000114815	0.00610998	-1.58442
ENSBTAG00000001801	synaptotagmin IV	SYT4	-0.663084	2.75971	0.011507	0.0870802	-1.58346
ENSBTAG00000027170	not annotated		-0.661586	0.540916	0.00486399	0.0530843	-1.58182
ENSBTAG00000008353	cyclin-dependent kinase inhibitor 1A (p21, Cip1)	CDKN1A	-0.66046	4.26155	0.000680389	0.0165297	-1.58059
ENSBTAG00000017846	F11 receptor	F11R	-0.659963	4.54332	0.00493161	0.0534445	-1.58004
ENSBTAG00000001903	chromosome 2 open reading frame 50 ortholog	C11H2orf5	-0.659714	0.505064	0.00703639	0.065642	-1.57977
ENSBTAG00000012818	PDZ and LIM domain 5	PDLIM5	-0.658641	2.88399	0.000222714	0.00862745	-1.5786
ENSBTAG00000004547	oxidized low density lipoprotein (lectin-like) receptor 1	OLR1	-0.657488	5.83459	2.75e-05	0.00260764	-1.57733
ENSBTAG00000004394	protein kinase (cAMP-dependent, catalytic) inhibitor beta	PKIB	-0.653767	4.65326	0.00126735	0.0243246	-1.57327
ENSBTAG00000002154	G protein-coupled receptor 141	GPR141	-0.650785	1.91021	0.000129373	0.00644635	-1.57002
ENSBTAG00000037537	similar to sialic acid binding Ig-like lectin 5	SIGLEC8	-0.649721	2.71689	0.00448376	0.0508558	-1.56886
ENSBTAG00000004322	v-fos FBJ murine osteosarcoma viral oncogene homolog	FOS	-0.649341	5.11228	0.00098132	0.0210619	-1.56845
ENSBTAG00000000942	signal-induced proliferation-associated 1 like 2	SIPA1L2	-0.647111	1.01986	0.0109863	0.0849613	-1.56603
ENSBTAG00000008545	activating transcription factor 3	ATF3	-0.646752	3.12941	5.44e-05	0.0038354	-1.56564
ENSBTAG00000005791	uroporphyrinogen III synthase	UROS	-0.645332	4.04069	9.26e-05	0.00530437	-1.5641
ENSBTAG00000033137	pleckstrin and Sec7 domain containing 3	PSD3	-0.644153	0.651489	0.0142764	0.0986919	-1.56282
ENSBTAG00000002333	HOP homeobox	HOP	-0.642954	5.21315	5.82e-07	0.000171839	-1.56152
ENSBTAG00000009477	pirin (iron-binding nuclear protein)	PIR	-0.641615	2.99921	2.34e-05	0.00243427	-1.56007
ENSBTAG00000017310	chromosome 21 open reading frame 63 ortholog	EVA1C	-0.632687	2.82303	6.4e-05	0.00419588	-1.55045
ENSBTAG00000012128	aminoadipate-semialdehyde synthase	AASS	-0.631276	3.44146	8.1e-05	0.00487955	-1.54893
ENSBTAG00000023666	ferritin		-0.631201	0.699798	0.0129152	0.0934391	-1.54885
ENSBTAG00000010244	chloride intracellular channel 5	CLIC5	-0.630294	3.18873	2.41e-05	0.00245426	-1.54788
ENSBTAG00000030426	not annotated		-0.629828	3.42231	0.00227158	0.0341929	-1.54738
ENSBTAG00000007206	striatin interacting protein 2	STRIP2	-0.628817	3.15351	0.00253694	0.0363212	-1.5463
ENSBTAG00000005015	sideroflexin 3	SFXN3	-0.62642	4.06862	1.27e-06	0.000321608	-1.54373
ENSBTAG00000012338	fumarylacetoacetate hydrolase (fumarylacetoacetase)	FAH	-0.624877	1.09734	0.00234655	0.0347093	-1.54208
ENSBTAG00000031430	CD83 molecule	CD83	-0.624805	4.26735	0.00133872	0.0249802	-1.542
ENSBTAG00000020144	G-protein coupled receptor 34	GPR34	-0.624775	1.9974	0.00742493	0.0675796	-1.54197
ENSBTAG00000008313	Kruppel-like factor 15	KLF15	-0.624195	1.06136	0.00322644	0.0418318	-1.54135
ENSBTAG00000018499	annexin A8-like 1	ANXA8	-0.623356	1.36361	0.00595413	0.0602814	-1.54045
ENSBTAG00000020872	complement component 5a receptor 1	C5AR1	-0.62201	6.59794	0.00163692	0.0277316	-1.53902
ENSBTAG00000015160	phospholipase D family, member 4	PLD4	-0.617708	7.36113	0.00013677	0.00665823	-1.53444
ENSBTAG00000038149	NLR family, pyrin domain containing 12	NLRP12	-0.617667	4.12636	0.00989099	0.0799459	-1.53439
ENSBTAG00000013759	tetraspanin 9	TSPAN9	-0.61654	0.271085	0.00653158	0.0630146	-1.53319
ENSBTAG00000002937	adhesion G protein-coupled receptor E3	EMR3/ADGRE3	-0.615538	6.29077	0.012265	0.0904658	-1.53213
ENSBTAG00000013099	aldolase C, fructose-bisphosphate	ALDOC	-0.614862	6.25207	4.64e-08	2.27e-05	-1.53141
ENSBTAG00000020997	G protein-coupled receptor 15	GPR15	-0.612197	4.13212	0.000308953	0.0105243	-1.52859
ENSBTAG00000030317	protein phosphatase 1, regulatory subunit 26	PPP1R26	-0.611818	0.980418	0.0114806	0.0869322	-1.52818
ENSBTAG00000006716	prostaglandin-endoperoxide synthase 1 (prostaglandin G/H synthase and cyclooxygenase)	PTGS1	-0.610436	1.41346	0.0058403	0.0595561	-1.52672
ENSBTAG00000008625	pleckstrin homology domain containing, family F (with FYVE domain) member 1	PLEKHF1	-0.60855	1.028	0.00177671	0.0293192	-1.52473
ENSBTAG00000002655	ZW10 interactor		-0.607072	3.82285	0.0104223	0.0825776	-1.52317
ENSBTAG00000006143	cAMP responsive element binding protein 3-like 1	CREB3L1	-0.604767	4.30138	0.00319357	0.0416786	-1.52073
ENSBTAG00000019386	non-classical MHC class I antigen	BOLA-NC	-0.604353	8.75528	0.00254523	0.036331	-1.5203
ENSBTAG00000021361	sterile alpha motif domain containing 3	SAMD3	-0.603614	2.05938	0.00207048	0.0323586	-1.51952
ENSBTAG00000047116	tubulin polymerization promoting protein	TPPP	-0.603077	2.01031	0.00200864	0.031704	-1.51895
ENSBTAG00000038141	G protein-coupled receptor 56		-0.60195	4.30014	0.0112646	0.0858599	-1.51777
ENSBTAG00000026501	cytochrome P450, family 2, subfamily D, polypeptide 6	MGC127 55	-0.601548	2.89049	3.51e-05	0.00299226	-1.51734
ENSBTAG00000001112	spermine oxidase	SMOX	-0.601403	2.82909	0.00107873	0.0221069	-1.51719
ENSBTAG00000011982	basic leucine zipper transcription factor, ATF-like 3	BATF3	-0.601131	2.82048	0.00012043	0.00621391	-1.51691
ENSBTAG00000001847	centlein, centrosomal protein	CNTLN	-0.598927	0.869321	0.00726631	0.0665644	-1.51459
ENSBTAG00000019107	growth arrest-specific 7	GAS7	-0.59542	5.7047	0.000109579	0.00589963	-1.51091
ENSBTAG00000014400	E2F transcription factor 2	E2F2	-0.59529	4.68923	5.8e-08	2.57e-05	-1.51078
ENSBTAG00000013294	ual-specificity tyrosine-(Y)-phosphorylation regulated kinase 3	DYRK3	-0.594657	1.8628	0.00764786	0.0689819	-1.51011
ENSBTAG00000019275	chromosome 9 open reading frame 80 ortholog	INIP	-0.593248	4.12569	0.000818166	0.0188226	-1.50864
ENSBTAG00000031725	tumor necrosis factor-like weak inducer of apoptosis	TNFSF12	-0.591514	3.43707	0.000177699	0.00778568	-1.50683
ENSBTAG00000020467	histamine receptor H4	HRH4	-0.589751	3.98267	0.000192133	0.00807891	-1.50499
ENSBTAG00000019486	claudin 12	CLDN12	-0.588634	1.716	0.000162877	0.00737583	-1.50382
ENSBTAG00000015108	Usher syndrome 1C binding protein 1	USHBP1	-0.585134	1.82745	0.00230842	0.0345381	-1.50018
ENSBTAG00000046157	not annotated		0.587761	0.771019	0.00850333	0.0729068	1.50291
ENSBTAG00000033677	WD repeat domain 90	WDR9	0.587991	4.82745	0.000129286	0.00644635	1.50315
ENSBTAG00000025812	not annotated		0.58803	4.0045	0.00309077	0.0408225	1.50319
ENSBTAG00000009284	glutaminase 2 (liver, mitochondrial)	GLS2	0.590307	3.33021	0.000155972	0.00720648	1.50557
ENSBTAG00000002605	not annotated		0.59421	0.851177	0.00270874	0.0377761	1.50965
ENSBTAG00000012966	secernin 3	SCRN3	0.595286	3.45569	0.0120278	0.089163	1.51077
ENSBTAG00000011337	ankyrin repeat domain 33B	ANKRD33B	0.595322	1.50093	0.000574005	0.0151076	1.51081
ENSBTAG00000015164	solute carrier family 27 (fatty acid transporter), member 5	SLC27A5	0.596901	1.64715	0.00161071	0.0274338	1.51246
ENSBTAG00000022580	chromosome 1 open reading frame 183 ortholog	FAM212B	0.599209	0.463058	0.00189429	0.0307001	1.51489
ENSBTAG00000008467	similar to UPF0486 protein C1orf59 homolog	HENMT1	0.600187	0.627862	0.0030392	0.0403797	1.51591
ENSBTAG00000031232	not annotated		0.60138	1.55867	0.0115613	0.0872129	1.51717
ENSBTAG00000019497	immunoglobulin-like domain containing receptor 2	ILDR2	0.601612	0.586398	0.00511463	0.0547314	1.51741
ENSBTAG00000019217	similar to Kinesin-like protein KIF13A (Kinesin-like protein RBKIN)	KIF13A	0.603888	5.61933	0.000185571	0.007916	1.51981
ENSBTAG00000025550	proline rich 22	PRR22	0.605568	0.74933	0.00464616	0.0518357	1.52158
ENSBTAG00000016048	carnitine palmitoyltransferase 1B (muscle)	CPT1B	0.605842	2.5457	0.00111869	0.0225453	1.52187
ENSBTAG00000002083	autism susceptibility candidate 2	AUTS2	0.605852	2.52981	0.00331847	0.0426334	1.52188
ENSBTAG00000014455	not annotated	PDZD2	0.608045	0.856991	0.00782782	0.0696501	1.52419
ENSBTAG00000014603	vesicle-associated membrane protein 1 (synaptobrevin 1)	VAMP1	0.6086	4.46416	0.000540148	0.0146508	1.52478
ENSBTAG00000005805	epoxide hydrolase 4	ABHD7	0.609143	2.37399	0.00489675	0.0532234	1.52535
ENSBTAG00000010164	espin-like	ESPNL	0.612808	4.25401	0.00215299	0.0331586	1.52923
ENSBTAG00000009216	hydrogen voltage-gated channel 1	HVCN1	0.613007	6.36078	0.000398959	0.0120579	1.52944
ENSBTAG00000042600	small nucleolar RNA SNORD94	SNORD94	0.614522	0.578275	0.00674959	0.0642399	1.53105
ENSBTAG00000018151	similar to DNA helicase HEL308		0.614767	3.81988	4.55e-05	0.00350406	1.53131
ENSBTAG00000001796	transmembrane protein 146	CATSPERD	0.615111	3.59246	0.000603088	0.0154981	1.53168
ENSBTAG00000013288	splicing factor, arginine/serine-rich 14	SUGP2	0.615221	6.44882	0.000133461	0.00659828	1.53179
ENSBTAG00000011932	proteoglycan 4	PRG4	0.615572	1.27751	0.0117906	0.0881243	1.53216
ENSBTAG00000004035	sidekick homolog 1, cell adhesion molecule (chicken)	SDK1	0.616521	2.35812	0.00239826	0.0350659	1.53317
ENSBTAG00000018156	keratinocyte associated protein 3	KRTCAP3	0.61668	2.65071	0.000506131	0.0139713	1.53334
ENSBTAG00000001818	LOC100271850-MEF2B readthrough transccript	MEF2B	0.618455	0.78387	0.00097507	0.0210321	1.53523
ENSBTAG00000013245	inositol 1,4,5-triphosphate receptor, type 3	ITPR3	0.618882	7.52137	3.68e-05	0.00305982	1.53568
ENSBTAG00000006941	alpha tubulin acetyltransferase 1	ATAT1	0.619011	4.50745	0.00146113	0.0262371	1.53582
ENSBTAG00000019208	chromosome 11 open reading frame 95	C11orf95	0.619016	2.95782	0.00264238	0.0371395	1.53583
ENSBTAG00000007851	interleukin 24	IL24	0.624512	3.17185	0.00200004	0.0316076	1.54169
ENSBTAG00000009607	glycosyltransferase-like 1B	GYLTL1B	0.62534	2.78431	0.001091	0.0222217	1.54257
ENSBTAG00000012036	hairless	HR	0.626007	2.91523	0.00028172	0.0100428	1.54329
ENSBTAG00000038974	stathmin-like 3	STMN3	0.628553	2.60518	0.0141012	0.0984993	1.54601
ENSBTAG00000014861	solute carrier family 20 (phosphate transporter), member 2	SLC2 A2	0.628799	4.54369	0.00290475	0.0390972	1.54628
ENSBTAG00000005094	LRP2 binding protein	LRP2BP	0.632483	0.402547	0.006056	0.0609705	1.55023
ENSBTAG00000045581	not annotated		0.632907	0.755398	0.000412802	0.0122835	1.55069
ENSBTAG00000011927	retinol dehydrogenase 5 (11-cis/9-cis)	RDH5	0.633466	1.67367	0.00152137	0.0267415	1.55129
ENSBTAG00000047707	major histocompatibility complex, class II, DO beta	BOLA-DOB	0.633834	6.25842	0.00132175	0.0247701	1.55168
ENSBTAG00000043347	small nucleolar RNA SNORA36 family	SNORA36	0.634487	0.436543	0.00863497	0.0733553	1.55239
ENSBTAG00000012391	hypothetical protein LOC524749	FAM63B	0.634682	4.15703	0.000575144	0.0151076	1.5526
ENSBTAG00000009679	pleckstrin homology domain containing, family G (with RhoGef domain) member 1	PLEKHG1	0.638031	2.26005	0.00779671	0.0694705	1.5562
ENSBTAG00000007996	5-hydroxytryptamine receptor 6 (5-HT-6) (Serotonin receptor 6)	HTR6	0.639783	1.24419	0.00775846	0.0692268	1.55809
ENSBTAG00000035995	tumor necrosis factor, alpha-induced protein 2	TNFAIP2	0.640895	7.119	0.00114356	0.022846	1.5593
ENSBTAG00000005069	transmembrane 7 superfamily member 2	TM7SF2	0.642607	3.55493	0.000104367	0.00574065	1.56115
ENSBTAG00000019689	hypothetical LOC511138	C11orf8	0.643819	0.175342	0.00554888	0.0576014	1.56246
ENSBTAG00000005033	hypothetical protein LOC785988	FAM57B	0.644771	1.80882	0.00260639	0.0368392	1.56349
ENSBTAG00000015345	BCL2/adenovirus E1B 19kD interacting protein like	BNIPL	0.646047	0.279858	0.00585501	0.0596425	1.56487
ENSBTAG00000046681	small nucleolar RNA SNORA73 family	SNORA73	0.648954	-0.0422657	0.00412995	0.0482752	1.56803
ENSBTAG00000005231	similar to hCG1647286	CFAP74	0.650545	0.741823	0.00190727	0.0307534	1.56976
ENSBTAG00000043432	small nucleolar RNA SNORD44	SNORD44	0.650581	0.933871	0.000478178	0.0134122	1.5698
ENSBTAG00000019355	potassium channel, subfamily K, member 10	KCNK1	0.652131	0.525324	0.00365562	0.0449418	1.57149
ENSBTAG00000006937	ATP-binding cassette, sub-family A (ABC1), member 10	ABCA1	0.653711	4.16387	0.00224169	0.0340118	1.57321
ENSBTAG00000017983	slowmo homolog 1 (Drosophila)	SLMO1	0.654611	0.56927	0.0025651	0.0365383	1.57419
ENSBTAG00000002035	ADP-ribosylation factor-like 5C	ARL5C	0.654833	4.24273	0.000339177	0.0110786	1.57443
ENSBTAG00000011871	B and T lymphocyte associated	BTLA	0.655352	4.6448	0.00466973	0.052047	1.575
ENSBTAG00000003963	Fer-1-like family member 5	FER1L5	0.656615	2.92212	0.000399995	0.0120579	1.57638
ENSBTAG00000001061	protein kinase C, alpha	PRKCA	0.658031	4.25215	4.91e-06	0.000770581	1.57793
ENSBTAG00000039190	solute carrier family 9 (sodium/hydrogen exchanger), member 5	SLC9A5	0.658943	1.89559	0.00811723	0.0710998	1.57893
ENSBTAG00000018446	grancalcin, EF-hand calcium binding protein	GCA	0.660426	2.35486	0.00581562	0.0594475	1.58055
ENSBTAG00000044712	Bta-mir-2383	bta-mir-2383	0.66316	0.480448	0.00551248	0.0573641	1.58355
ENSBTAG00000020649	class II, major histocompatibility complex, transactivator	CIITA	0.663835	8.15529	1.57e-05	0.00174701	1.58429
ENSBTAG00000018071	tropomodulin 4 (muscle)	TMOD4	0.664064	1.44657	0.00475915	0.0524038	1.58454
ENSBTAG00000024947	testicular cell adhesion molecule 1 homolog (mouse)		0.664123	0.973323	0.00175132	0.029088	1.5846
ENSBTAG00000003506	six transmembrane epithelial antigen of the prostate 2	STEAP2	0.665085	3.09186	1.57e-06	0.000384284	1.58566
ENSBTAG00000010070	gasdermin A	GSDMA	0.666994	3.06887	0.0128311	0.0930548	1.58776
ENSBTAG00000015926	actin binding LIM protein family, member 2	ABLIM2	0.66849	0.639327	0.00721282	0.0663621	1.58941
ENSBTAG00000015251	asparagine-linked glycosylation 13 homolog (S. cerevisiae)	ALG13	0.67078	1.72447	0.000458066	0.0131085	1.59193
ENSBTAG00000039206	schlafen family member 14	SLFN14	0.67234	2.7072	0.00083757	0.0190197	1.59366
ENSBTAG00000012854	gasdermin B	GSDMB	0.675068	3.6755	0.000125758	0.00639153	1.59667
ENSBTAG00000042930	small nucleolar RNA SNORA17	SNORA17	0.67582	1.05065	0.000856648	0.0192307	1.5975
ENSBTAG00000021609	G protein-coupled receptor 110	GPR11	0.676499	2.45447	0.00711469	0.0659848	1.59826
ENSBTAG00000012808	mannan-binding lectin serine peptidase 2	MASP2	0.680767	4.38007	0.00061163	0.0155184	1.60299
ENSBTAG00000005973	oviductal glycoprotein 1, 120kDa	OVGP1	0.682152	1.98423	0.000274397	0.0099048	1.60453
ENSBTAG00000032122	CD19 molecule	CD19	0.683407	6.85683	0.000297312	0.0103973	1.60593
ENSBTAG00000001325	ureidopropionase, beta	UPB1	0.68536	2.29628	0.0116226	0.0874346	1.6081
ENSBTAG00000016496	zinc finger protein 641	ZNF641	0.694035	0.0605439	0.00226475	0.0341929	1.6178
ENSBTAG00000005972	not annotated		0.694828	0.977766	0.00393366	0.0469306	1.61869
ENSBTAG00000018808	solute carrier family 25, member 35	SLC25A35	0.698076	2.14867	2.35e-06	0.000509258	1.62234
ENSBTAG00000006770	Mdm2, transformed 3T3 cell double minute 2, p53 binding protein (mouse) binding protein, 104kDa	MTBP	0.698479	3.95567	2.8e-05	0.00260764	1.62279
ENSBTAG00000038978	Kinesin-like protein		0.699182	1.76062	0.00158852	0.0272889	1.62358
ENSBTAG00000006974	pleckstrin homology domain containing, family A member 7	PLEKHA7	0.702095	0.0789103	0.00237314	0.0348661	1.62687
ENSBTAG00000047402	family with sequence similarity 170, member B	FAM17 B	0.707421	1.48186	0.00337993	0.0432046	1.63288
ENSBTAG00000015879	tubby like protein 3	TULP3	0.713026	3.43338	0.0138765	0.0977352	1.63924
ENSBTAG00000037179	small nucleolar RNA U3	U3	0.714056	-0.186847	0.00355716	0.0442563	1.64041
ENSBTAG00000031186	guanylate binding protein family, member 6	GBP6	0.715865	3.34236	0.00981711	0.0794498	1.64247
ENSBTAG00000013569	CD38 molecule	CD38	0.718835	5.55753	0.000822222	0.0188577	1.64585
ENSBTAG00000001816	solute carrier family 25, member 42	SLC25A42	0.718861	2.49516	6.28e-05	0.0041928	1.64588
ENSBTAG00000034368	protease, serine, 33	PRSS33	0.723439	1.32435	0.00553712	0.0575263	1.65111
ENSBTAG00000005019	protease, serine, 50	PRSS5	0.725183	1.71034	0.00232611	0.0345381	1.65311
ENSBTAG00000040046	not annotated		0.726704	3.00686	0.000780667	0.0182673	1.65485
ENSBTAG00000021302	chondroadherin	CHAD	0.727115	1.14737	0.00349389	0.0437805	1.65533
ENSBTAG00000007223	F-box protein 2	FBXO2	0.732574	0.393409	0.00120765	0.0237163	1.6616
ENSBTAG00000040559	protein tyrosine phosphatase, receptor type, H	PTPRH	0.736158	1.90741	0.00860893	0.0732331	1.66573
ENSBTAG00000012377	enoyl Coenzyme A hydratase domain containing 3	ECHDC3	0.737489	2.62996	0.00166885	0.0281599	1.66727
ENSBTAG00000000512	syntrophin, alpha 1 (dystrophin-associated protein A1, 59kDa, acidic component)	SNTA1	0.740331	1.73927	0.00571752	0.0586334	1.67056
ENSBTAG00000002781	glucosaminyl (N-acetyl) transferase 4, core 2 (beta-1,6-N-acetylglucosaminyltransferase)	GCNT4	0.740643	3.06933	7.73e-06	0.00104367	1.67092
ENSBTAG00000013110	FERM, RhoGEF and pleckstrin domain protein 2	FARP2	0.743693	2.33595	3.64e-05	0.00303998	1.67446
ENSBTAG00000008542	SCO-spondin homolog (Bos taurus)	SSPO	0.745359	4.86034	0.00771418	0.0689939	1.67639
ENSBTAG00000017701	cytochrome P450, family 2, subfamily W, polypeptide 1	CYP2W1	0.747482	1.87736	0.00199872	0.0316076	1.67886
ENSBTAG00000019712	suppression of tumorigenicity 14 (colon carcinoma)	ST14	0.747904	1.94792	0.0130506	0.0941592	1.67935
ENSBTAG00000009994	echinoderm microtubule associated protein like 5	EML5	0.756235	3.46412	0.000954677	0.0206999	1.68908
ENSBTAG00000020839	multiple EGF-like-domains 6	MEGF6	0.756452	1.07652	0.00309462	0.0408309	1.68933
ENSBTAG00000008869	glypican 2	GPC2	0.758129	3.33402	5.17e-05	0.00379182	1.6913
ENSBTAG00000020957	Frizzled class receptor 5	FZD5	0.759246	3.28695	0.00118661	0.0233391	1.69261
ENSBTAG00000002706	glutathione transferase zeta 1	GSTZ1	0.763812	2.11546	0.00574941	0.0588957	1.69797
ENSBTAG00000014508	F-box protein 40	FBXO4	0.770347	2.6861	0.000104037	0.00574065	1.70568
ENSBTAG00000005170	adhesion G protein-coupled receptor G5	GPR114	0.770838	5.01009	5.56e-05	0.00385878	1.70626
ENSBTAG00000014602	calmodulin binding transcription activator 1	CAMTA1	0.770962	1.29244	0.000452781	0.0130454	1.70641
ENSBTAG00000001213	not annotated		0.772504	1.58323	0.00418545	0.0486109	1.70823
ENSBTAG00000010881	A kinase (PRKA) anchor protein 14	AKAP14	0.772696	0.339017	0.000836198	0.0190197	1.70846
ENSBTAG00000017564	cingulin	CGN	0.776111	1.98689	2.45e-05	0.00245662	1.71251
ENSBTAG00000014529	guanylate binding protein 4	GBP4	0.778895	5.54667	0.00101568	0.0212198	1.71582
ENSBTAG00000004588	potassium intermediate/small conductance calcium-activated channel, subfamily N, member 4	KCNN4	0.785673	5.83402	0.000192977	0.00807891	1.7239
ENSBTAG00000005527	gastric inhibitory polypeptide receptor	GIPR	0.788595	0.391145	0.00658728	0.0632388	1.72739
ENSBTAG00000014088	muscleblind-like 3 (Drosophila)	MBNL3	0.788964	2.00106	0.000553427	0.0148039	1.72783
ENSBTAG00000045010	Bta-mir-2350	bta-mir-235	0.789009	-0.290503	0.00677686	0.0643939	1.72789
ENSBTAG00000009620	WD repeat domain 27	WDR27	0.794264	1.86695	2.73e-06	0.000536707	1.73419
ENSBTAG00000012031	autophagy related 9B	ATG9B	0.795699	0.950843	1.79e-05	0.00190698	1.73592
ENSBTAG00000024633	phosphatidylinositol-4-phosphate 3-kinase, catalytic subunit type 2 beta	PIK3C2B	0.797473	5.91361	3.94e-05	0.00318737	1.73805
ENSBTAG00000013920	cilia and flagella associated protein 44	CFAP44	0.797645	0.942232	0.000371259	0.0117053	1.73826
ENSBTAG00000018164	fibronectin type III domain containing 4	FNDC4	0.80058	0.382028	0.0101456	0.0812796	1.7418
ENSBTAG00000016274	coiled-coil domain containing 38	CCDC38	0.804185	-0.250771	0.00305116	0.0404583	1.74616
ENSBTAG00000005378	XK, Kell blood group complex subunit-related, X-linked	XKRX	0.804762	1.92205	0.000221775	0.00862745	1.74686
ENSBTAG00000000616	G protein-coupled receptor 161	GPR161	0.804986	0.174236	0.000316844	0.0106353	1.74713
ENSBTAG00000005017	zinc finger protein 169	ZNF169	0.805969	0.578328	0.00175039	0.029088	1.74832
ENSBTAG00000046265	not annotated		0.808995	1.29785	0.00386355	0.0463115	1.75199
ENSBTAG00000004797	TRNA methyltransferase 44 homolog	TRMT44	0.812068	5.13085	4.87e-05	0.00370785	1.75573
ENSBTAG00000020341	Mov10l1, Moloney leukemia virus 10-like 1, homolog (mouse)	MOV1 L1	0.812452	2.58929	0.00385585	0.0463067	1.75619
ENSBTAG00000015040	similar to mCG22096		0.815725	2.80477	0.00176898	0.0292725	1.76018
ENSBTAG00000047570	not annotated		0.817811	4.54594	0.00694976	0.0651688	1.76273
ENSBTAG00000002477	FtsJ homolog 2 (E. coli)	FTSJ2	0.822427	4.96607	5.88e-08	2.57e-05	1.76838
ENSBTAG00000015984	cell adhesion molecule 4	CADM4	0.82567	2.03243	0.000429551	0.0125638	1.77236
ENSBTAG00000012567	telomerase reverse transcriptase	TERT	0.837484	3.33463	0.000143544	0.00685668	1.78693
ENSBTAG00000044419	5S ribosomal RNA	5S_rRNA	0.838276	0.549464	0.000492361	0.0137192	1.78791
ENSBTAG00000008576	pleckstrin homology domain containing, family D (with coiled-coil domains) member 1	PLEKHD1	0.846473	3.43773	5.16e-07	0.000160064	1.7981
ENSBTAG00000003455	ankyrin repeat domain 6	ANKRD6	0.846552	1.40925	0.00123287	0.0239031	1.7982
ENSBTAG00000037945	CASK interacting protein 1	CASKIN1	0.850894	1.88189	0.000124265	0.00634099	1.80362
ENSBTAG00000001293	MYCBP-associated, testis expressed 1	MAATS1	0.851224	0.898925	2.83e-05	0.00260764	1.80403
ENSBTAG00000004014	fibulin 2	FBLN2	0.851561	0.895185	0.000791293	0.0183449	1.80445
ENSBTAG00000005556	cytoglobin	CYGB	0.854204	2.67394	0.00227203	0.0341929	1.80776
ENSBTAG00000003398	potassium voltage-gated channel, subfamily G, member 1	KCNG1	0.857165	0.484039	0.0101885	0.0814937	1.81148
ENSBTAG00000019241	fibroblast growth factor 11	FGF11	0.862079	-0.11145	0.00842657	0.0725686	1.81766
ENSBTAG00000014541	platelet-derived growth factor alpha polypeptide	PDGFA	0.862085	1.32928	4.98e-05	0.00376858	1.81766
ENSBTAG00000021902	aldehyde dehydrogenase 5 family, member A1	ALDH5A1	0.866597	5.85966	7.68e-05	0.00469114	1.82336
ENSBTAG00000014100	BAI1-associated protein 3	BAIAP3	0.866726	1.00274	5.67e-05	0.00391609	1.82352
ENSBTAG00000016343	Kv channel interacting protein 2	KCNIP2	0.871981	0.933619	0.00160238	0.0273345	1.83017
ENSBTAG00000010852	butyrophilin, subfamily 2, member A2		0.879899	3.58204	0.000163701	0.00737583	1.84025
ENSBTAG00000003901	DNA (cytosine-5-)-methyltransferase 3 beta	DNMT3B	0.881764	4.89674	2.36e-06	0.000509258	1.84263
ENSBTAG00000025903	glycine dehydrogenase (decarboxylating)	GLDC	0.882421	1.37299	0.000506906	0.0139713	1.84347
ENSBTAG00000021517	transmembrane protein 216	TMEM216	0.892884	1.84187	0.000193757	0.00807891	1.85688
ENSBTAG00000020713	BTB and CNC homology 1, basic leucine zipper transcription factor 2	BACH2	0.898035	4.7955	3.55e-08	1.88e-05	1.86353
ENSBTAG00000006626	transmembrane protein 132B	TMEM132B	0.910575	1.16379	0.00509859	0.054669	1.87979
ENSBTAG00000000462	coiled-coil domain containing 102A	CCDC1 2A	0.916054	3.17703	4.44e-05	0.00348611	1.88695
ENSBTAG00000027770	not annotated		0.919903	-0.0495222	0.010577	0.0833694	1.89199
ENSBTAG00000013281	spermatogenesis associated 21	SPATA21	0.920087	2.95563	0.00360051	0.0445088	1.89223
ENSBTAG00000001580	calmegin	CLGN	0.922369	3.68152	0.000236937	0.0090406	1.89522
ENSBTAG00000012111	PR domain containing 5	PRDM5	0.926894	-0.493063	0.0110472	0.0852264	1.90118
ENSBTAG00000007917	teashirt zinc finger homeobox 2	TSHZ2	0.927888	-0.21935	0.00878552	0.0738003	1.90249
ENSBTAG00000010978	prospero homeobox 1	PROX1	0.930244	2.23572	5.02e-05	0.0037704	1.9056
ENSBTAG00000019461	numb homolog (Drosophila)-like	NUMBL	0.934993	3.1056	1.25e-06	0.000321608	1.91188
ENSBTAG00000016761	NADPH oxidase 1	NOX1	0.93954	0.217462	0.00340032	0.0433361	1.91792
ENSBTAG00000047996	interferon induced transmembrane protein 10	IFITM1	0.941238	3.61108	1.12e-06	0.000297773	1.92017
ENSBTAG00000031383	small integral membrane protein 24	SMIM24	0.941746	-0.0746136	0.000253199	0.00937942	1.92085
ENSBTAG00000046367	not annotated		0.942001	0.815997	8.15e-06	0.00107877	1.92119
ENSBTAG00000009852	neuron navigator 3	NAV3	0.944635	4.93584	3.75e-06	0.000619136	1.9247
ENSBTAG00000001826	SAM and SH3 domain containing 1	SASH1	0.952225	-0.0541805	0.0122466	0.0904156	1.93485
ENSBTAG00000012222	fatty acid 2-hydroxylase	FA2H	0.958656	-0.569508	0.00575236	0.0588957	1.9435
ENSBTAG00000017063	erythrocyte membrane protein band 4.1 like 4B	EPB41L4B	0.963591	0.441123	0.000359554	0.0114212	1.95016
ENSBTAG00000017366	growth factor receptor-bound protein 7	GRB7	0.966046	3.50276	0.000154717	0.00717456	1.95348
ENSBTAG00000013420	fibronectin type III and SPRY domain containing 1-like	FSD1L	0.976339	0.713262	8.43e-05	0.00497875	1.96747
ENSBTAG00000019947	synaptotagmin VII	SYT7	0.981588	2.32739	0.00329124	0.0425416	1.97464
ENSBTAG00000022379	V-set and immunoglobulin domain containing 2	VSIG2	0.989666	-0.1263	0.0145142	0.0998963	1.98573
ENSBTAG00000008626	potassium intermediate/small conductance calcium-activated channel, subfamily N, member 1	KCNN1	0.999148	0.995724	0.00130171	0.0246125	1.99882
ENSBTAG00000026489	tumor necrosis factor receptor superfamily, member 13C	TNFRSF13C	1.00258	2.53081	0.000244371	0.00918799	2.00358
ENSBTAG00000019293	early growth response 3	EGR3	1.0048	1.15364	5.92e-05	0.00402035	2.00666
ENSBTAG00000021798	erbB-2	ERBB2	1.01189	6.18252	4.5e-05	0.00348975	2.01655
ENSBTAG00000038127	not annotated		1.02193	-0.21297	0.000388397	0.0119491	2.03064
ENSBTAG00000015539	Rap guanine nucleotide exchange factor (GEF) 5	RAPGEF5	1.0279	0.645322	0.000962646	0.0208371	2.03905
ENSBTAG00000046408	family with sequence similarity 124A	FAM124A	1.03065	0.338219	5.51e-05	0.00385017	2.04294
ENSBTAG00000003200	similar to mCG118705		1.03645	1.65413	2.65e-06	0.000536707	2.05117
ENSBTAG00000025161	1-acylglycerol-3-phosphate O-acyltransferase 2 (lysophosphatidic acid acyltransferase, beta)	AGPAT2	1.0368	2.99343	0.00021719	0.00852996	2.05167
ENSBTAG00000039341	not annotated		1.03794	1.46386	2.91e-05	0.00262165	2.05329
ENSBTAG00000009797	RIMS binding protein 2	RIMBP2	1.04046	0.736123	0.000845633	0.0190846	2.05688
ENSBTAG00000003835	bone morphogenetic protein 4	BMP4	1.05278	1.78256	1.6e-05	0.00176633	2.07453
ENSBTAG00000000945	ATPase, Ca++ transporting, type 2C, member 2	ATP2C2	1.0572	1.11697	0.00330698	0.0425651	2.08089
ENSBTAG00000013791	free fatty acid receptor 3	GPR41	1.0629	2.67521	3.81e-05	0.00312792	2.08913
ENSBTAG00000032132	elongation factor RNA polymerase II-like 3	ELL3	1.06921	3.86313	1.07e-05	0.00132678	2.09828
ENSBTAG00000045806	free fatty acid receptor 1	FFAR1	1.07395	1.75807	0.000194285	0.00807891	2.10519
ENSBTAG00000020824	keratin 10 (epidermolytic hyperkeratosis; keratosis palmaris et plantaris)	KRT1	1.08285	0.0365504	0.000159784	0.00730294	2.11822
ENSBTAG00000004770	sodium channel, voltage gated, type IV alpha subunit	SCN4A	1.08608	1.55032	0.000117126	0.00610998	2.12297
ENSBTAG00000008943	zinc finger and SCAN domain containing 12	ZSCAN12	1.08641	1.23456	0.000462621	0.0131207	2.12345
ENSBTAG00000006357	cysteine-rich protein 3	CRIP3	1.09503	2.56961	0.000117333	0.00610998	2.13618
ENSBTAG00000012219	chondroitin sulfate proteoglycan 4	CSPG4	1.12647	2.51009	0.00181117	0.0296939	2.18323
ENSBTAG00000046452	not annotated		1.13214	2.0303	5.55e-07	0.000167833	2.19184
ENSBTAG00000021626	megalencephalic leukoencephalopathy with subcortical cysts 1	MLC1	1.17589	1.62728	1.46e-07	5.64e-05	2.25933
ENSBTAG00000013078	dynein heavy chain Bv1	DNAH11	1.17674	2.00374	0.000384205	0.011909	2.26065
ENSBTAG00000046793	not annotated		1.18262	-0.753063	0.000951047	0.0206918	2.26988
ENSBTAG00000002835	SMAD family member 1	SMAD1	1.18284	-0.395868	0.0040908	0.0481478	2.27023
ENSBTAG00000003763	myosin VC	MYO5C	1.18905	3.89408	0.000116573	0.00610998	2.28002
ENSBTAG00000016849	poly(A) binding protein, cytoplasmic 1-like	PABPC1L	1.18928	0.982321	4.22e-07	0.000134111	2.28039
ENSBTAG00000010532	potassium channel tetramerisation domain containing 11	KCTD11	1.22705	3.92127	7.29e-11	1.32e-07	2.34088
ENSBTAG00000016867	hydroxysteroid (17-beta) dehydrogenase 3	HSD17B3	1.22809	-0.285131	0.00252084	0.0363212	2.34257
ENSBTAG00000001049	Kallmann syndrome 1 sequence	KAL1	1.23837	-0.545505	0.00457469	0.0514379	2.35932
ENSBTAG00000008158	coiled-coil domain containing 68	CCDC68	1.24457	0.0058339	0.000882655	0.019641	2.36948
ENSBTAG00000014953	not annotated		1.25806	5.82865	6.44e-05	0.00419588	2.39174
ENSBTAG00000022158	troponin T type 3 (skeletal, fast)	TNNT3	1.25956	1.44887	0.000134713	0.00660875	2.39423
ENSBTAG00000008940	neuronal pentraxin I	NPTX1	1.3045	-0.639262	0.00304135	0.0403797	2.46998
ENSBTAG00000033642	not annotated		1.3445	2.12114	0.000568679	0.0150534	2.53943
ENSBTAG00000045674	interferon beta-1 precursor	INFB1	1.37897	1.21248	1.46e-05	0.00167831	2.60082
ENSBTAG00000001739	cadherin 20, type 2	CDH2	1.39291	2.07155	8.57e-09	6.07e-06	2.62608
ENSBTAG00000047684	not annotated		1.39826	0.00321099	0.0099751	0.0804217	2.63583
ENSBTAG00000016739	RAS protein activator like 1 (GAP1 like); similar to RasGAP-activating-like protein 1	RASAL1	1.46057	1.83349	5.42e-05	0.0038354	2.75217
ENSBTAG00000018181	coiled-coil domain containing 8	CCDC8	1.47798	-0.0953864	5.2e-05	0.00379182	2.78559
ENSBTAG00000020203	transmembrane protein 151A	TMEM151A	1.51271	1.10327	6.53e-07	0.000188478	2.85346
ENSBTAG00000022715	deleted in malignant brain tumors 1	DMBT1	1.51287	2.7786	0.00425998	0.0491859	2.85377
ENSBTAG00000021777	double C2-like domain-containing protein gamma	DOC2G	1.54819	3.10528	5.02e-10	5.8e-07	2.9245
ENSBTAG00000012023	glutathione peroxidase 6	GPX6	1.56162	-0.42843	0.000301986	0.0104454	2.95186
ENSBTAG00000015565	similar to MHC class II antigen	DSB	1.60651	1.74677	3.37e-08	1.88e-05	3.04513
ENSBTAG00000020116	MHC Class I JSP.1	JSP.1	1.61727	10.0668	3.12e-10	3.96e-07	3.06795
ENSBTAG00000006035	protein phosphatase 1, regulatory (inhibitor) subunit 1B	PPP1R1B	1.65797	5.6829	5.36e-05	0.0038354	3.15572
ENSBTAG00000004982	glycosylphosphatidylinositol specific phospholipase D1	GPLD1	1.70408	1.699	0.000576671	0.0151076	3.2582
ENSBTAG00000015197	kelch domain containing 8A	KLHDC8A	1.74315	2.03591	1.12e-06	0.000297773	3.34765
ENSBTAG00000003152	interferon, alpha-inducible protein 27	IFI27	1.76181	3.90574	0.000439186	0.0127114	3.39124
ENSBTAG00000004653	adhesion G protein-coupled receptor A3	GPR125	1.76337	1.81693	7.34e-08	3.11e-05	3.39491
ENSBTAG00000047473	not annotated		1.76403	1.14293	0.000307444	0.0105243	3.39646
ENSBTAG00000045635	not annotated		1.80112	-0.756699	0.000628674	0.0156798	3.4849
ENSBTAG00000039041	not annotated		1.91328	4.96877	9.58e-13	3.36e-09	3.76663
ENSBTAG00000004488	meiosis inhibitor 1	MEI1	1.91782	1.2958	1.49e-05	0.00167831	3.77853
ENSBTAG00000002850	HEAT repeat containing 9	HEATR9	1.93344	-0.329799	3.58e-06	0.000605838	3.81966
ENSBTAG00000000603	junctional adhesion molecule 2	JAM2	2.01639	0.372801	0.00032045	0.0107148	4.0457
ENSBTAG00000009836	chromogranin A (parathyroid secretory protein 1)	CHGA	2.20201	0.0909077	1.92e-14	1.22e-10	4.60121
ENSBTAG00000018432	solute carrier family 6 (neutral amino acid transporter), member 15	SLC6A15	2.27909	0.285298	0.000299105	0.0104121	4.85372
ENSBTAG00000006349	exostoses (multiple)-like 1	EXTL1	2.60112	0.790176	1.89e-10	2.67e-07	6.06756
ENSBTAG00000025642	ryanodine receptor 3	RYR3	2.69068	3.17347	3.63e-06	0.000607634	6.45619
ENSBTAG00000004948	family with sequence similarity 84, member A	FAM84A	2.82034	2.79095	4.38e-05	0.00345359	7.0633
ENSBTAG00000040586	serine (or cysteine) proteinase inhibitor, clade B; serpin peptidase inhibitor, clade B (ovalbumin), member 4; similar to serpin peptidase inhibitor, clade B like		2.97365	-0.134834	0.000997424	0.0211574	7.8552
ENSBTAG00000039037	serine (or cysteine) proteinase inhibitor, clade B; serpin peptidase inhibitor, clade B (ovalbumin), member 4; similar to serpin peptidase inhibitor, clade B like	SERPINB4	3.07331	1.64919	0.000157659	0.00723183	8.41701
ENSBTAG00000035224	not annotated		3.36902	-1.01868	0.00128774	0.0244585	10.3318
ENSBTAG00000038652	similar to LOC510193 protein; similar to Apolipoprotein L, 3		3.59095	5.10572	1.48e-05	0.00167831	12.0499
