# Supplementary material for: Characterisation of the Whole Blood mRNA Transcriptome in Holstein-Friesian and Jersey Calves in Response to Gradual Weaning
Source: PLoS One. 2016 Aug 1;11(8):e0159707. doi: 10.1371/journal.pone.0159707 (PMC4968839; doi:10.1371/journal.pone.0159707)
Supplement: S3 Table — (XLSX) [file pone.0159707.s003.xlsx]

## Sheet: Supplementary Table 5.3
S3 Table. Differentially expressed genes between Holstein-Friesian and Jersey calves at day 8, relative to weaning (P < 0.05; FDR < 0.1; fold change > 0.05)
ID	Gene names	Gene symbol	logFC	logCPM	PValue	FDR	Fold Change
ENSBTAG00000021565	protease, serine, 2 (trypsin 2)	PRSS2	-5.11679	4.37062	3.2578e-12	1.03484e-08	-34.6983
ENSBTAG00000031825	hypothetical LOC786987		-4.32495	0.749627	1.24744e-05	0.00161478	-20.042
ENSBTAG00000004757	latent transforming growth factor beta binding protein 4	LTBP4	-4.02526	2.06069	6.22022e-05	0.00464907	-16.2826
ENSBTAG00000032007	Low-density lipoprotein receptor-related protein 11	LRP11	-3.59791	0.237576	6.87364e-06	0.00109796	-12.1082
ENSBTAG00000007772	solute carrier family 29 (nucleoside transporters), member 4	SLC29A4	-3.34269	0.962731	0.000502092	0.0169837	-10.145
ENSBTAG00000004247	rabphilin 3A homolog (mouse)	RPH3A	-2.82946	-0.10906	0.00155029	0.0340208	-7.10809
ENSBTAG00000000930	not annotated		-2.78772	1.16366	7.2085e-10	1.01768e-06	-6.90539
ENSBTAG00000039682	mitochondrial tumor suppressor 1	MTUS1	-2.7646	1.93553	1.36132e-09	1.44141e-06	-6.7956
ENSBTAG00000001476	similar to MHC class I antigen		-2.73172	4.57044	4.40149e-05	0.00385692	-6.64247
ENSBTAG00000009012	pentraxin-related gene, rapidly induced by IL-1 beta	PTX3	-2.6603	0.9284	1.71511e-05	0.00196326	-6.32163
ENSBTAG00000045895	not annotated	NFASC	-2.61908	-0.79855	0.000346464	0.013629	-6.1436
ENSBTAG00000004950	brain ribonuclease	BRN	-2.29988	4.07621	0.0002531	0.0109066	-4.92416
ENSBTAG00000037644	hemoglobin, gamma; hemoglobin, gamma 2; hemoglobin, beta		-2.22172	-0.332657	0.000734203	0.0218673	-4.66448
ENSBTAG00000047914	cadherin-related family member 5 precursor	CDHR5	-2.08541	1.46663	0.000754496	0.0220152	-4.24397
ENSBTAG00000000795	nicotinamide nucleotide adenylyltransferase 2	NMNAT2	-2.06698	1.77881	9.99295e-05	0.00619368	-4.19008
ENSBTAG00000030424	C-type lectin domain family 1, member A	CLEC1A	-2.03951	1.65636	5.71277e-08	2.68839e-05	-4.11105
ENSBTAG00000039504	not annotated		-1.99032	2.15386	7.01689e-09	4.05257e-06	-3.97325
ENSBTAG00000006343	interleukin 1 receptor, type II	IL1R2	-1.9253	2.48132	8.31482e-11	1.7608e-07	-3.79816
ENSBTAG00000014975	solute carrier family 4, anion exchanger, member 3	SLC4A3	-1.88918	0.788066	1.79394e-05	0.00201715	-3.70423
ENSBTAG00000007312	CD209 molecule	CD209	-1.86928	1.12991	0.000118519	0.00687628	-3.65351
ENSBTAG00000002786	similar to Myeloid-associated differentiation marker		-1.8314	5.78034	0.00223426	0.0423079	-3.55883
ENSBTAG00000009737	leukotriene C4 synthase	LTC4S	-1.7221	1.67349	6.063e-07	0.000197529	-3.29916
ENSBTAG00000038698	similar to ATP-binding cassette transporter C4		-1.70519	1.81486	0.00548518	0.0713087	-3.26072
ENSBTAG00000006019	family with sequence similarity 178, member B	FAM178B	-1.70291	0.192381	0.0012767	0.0295477	-3.25556
ENSBTAG00000000570	ret proto-oncogene	RET	-1.69681	2.67747	1.02453e-09	1.18343e-06	-3.24183
ENSBTAG00000045630	not annotated		-1.68969	0.762992	0.00808216	0.0903184	-3.22588
ENSBTAG00000040103	synaptotagmin VIII	SYT8	-1.6837	0.150799	0.00439212	0.0629727	-3.2125
ENSBTAG00000007904	keratin 72	KRT72	-1.67921	1.19886	5.34193e-06	0.000904994	-3.20252
ENSBTAG00000015994	leucine rich repeat containing 63	LRRC63	-1.65427	0.7879	2.41121e-06	0.000502244	-3.14764
ENSBTAG00000000585	lymphocyte antigen 6 complex, locus G6C	LY6G6C	-1.61054	4.33924	2.48691e-06	0.000509655	-3.05366
ENSBTAG00000038288	killer cell immunoglobulin-like receptor, two domains, short cytoplasmic tail, 1	KIR2SL1	-1.56909	0.912708	3.74422e-06	0.000720819	-2.96717
ENSBTAG00000017895	C-type lectin domain family 10, member A	CLEC1 A	-1.49565	-0.368278	2.4122e-05	0.002533	-2.81992
ENSBTAG00000011961	platelet factor 4	PF4	-1.46908	8.27604	5.90997e-07	0.000197529	-2.76845
ENSBTAG00000003454	regulator of G-protein signaling 20	RGS2	-1.45311	3.68016	6.84712e-07	0.000202324	-2.73798
ENSBTAG00000038843	NKG2C protein	NKG2C	-1.43069	0.545108	0.0013994	0.0316384	-2.69577
ENSBTAG00000003781	myeloproliferative leukemia virus oncogene	MPL	-1.42552	0.0392272	4.38342e-06	0.000784446	-2.6861
ENSBTAG00000046090	not annotated		-1.41673	2.7349	6.51582e-05	0.00473838	-2.66979
ENSBTAG00000012991	prune homolog 2 (Drosophila)	PRUNE2	-1.406	0.22778	3.10116e-07	0.000123135	-2.65001
ENSBTAG00000007421	cadherin 5, type 2 (vascular endothelium)	CDH5	-1.39843	0.0620921	1.85379e-05	0.00206617	-2.63615
ENSBTAG00000002885	macrophage scavenger receptor 1	MSR1	-1.38364	3.4194	3.9778e-07	0.000144406	-2.60926
ENSBTAG00000045751	not annotated		-1.36193	4.42332	0.00202378	0.0394995	-2.57029
ENSBTAG00000007173	platelet-derived growth factor receptor, alpha polypeptide	PDGFRA	-1.34409	1.17037	0.00409894	0.0607423	-2.5387
ENSBTAG00000034384	Von Willebrand factor A domain containing 3B	VWA3B	-1.33978	1.45407	1.26018e-05	0.00161478	-2.53113
ENSBTAG00000027327	Osteoclast stimulatory transmembrane protein	OCSTAMP	-1.33142	-0.146493	0.00111308	0.0274197	-2.5165
ENSBTAG00000006485	triggering receptor expressed on myeloid cells-like 1	TREML1	-1.3139	2.38852	0.000133984	0.00737114	-2.48612
ENSBTAG00000003289	C-C motif chemokine 3	CCL3	-1.26994	0.207007	0.000120154	0.00690805	-2.41152
ENSBTAG00000020657	FAT tumor suppressor homolog 1 (Drosophila)	FAT1	-1.2688	2.47484	0.00950143	0.0999381	-2.40962
ENSBTAG00000017045	fatty acid binding protein 2, intestinal	FABP2	-1.26157	0.0789317	0.00667131	0.0806719	-2.39757
ENSBTAG00000005574	clusterin	CLU	-1.26028	5.58683	9.02587e-06	0.00133352	-2.39542
ENSBTAG00000014666	glycoprotein IX (platelet)	GP9	-1.25033	1.26647	0.00306537	0.0526332	-2.37895
ENSBTAG00000007181	Kinesin family member C3	KIFC3	-1.23339	3.98734	4.35015e-07	0.000153536	-2.35119
ENSBTAG00000005841	not annotated		-1.21985	4.9947	4.7908e-10	7.60898e-07	-2.32922
ENSBTAG00000037830	not annotated		-1.21376	2.10913	0.00319282	0.0540907	-2.31941
ENSBTAG00000013525	chromosome 6 open reading frame 25	C6ORF25	-1.21288	7.94	8.73667e-07	0.000242381	-2.31799
ENSBTAG00000007720	similar to NKG2-A/NKG2-B type II integral membrane protein (NKG2-A/B-activating NK receptor) (NK cell receptor A) (CD159a antigen)	NKG2A	-1.2026	2.08274	6.45035e-05	0.00473838	-2.30154
ENSBTAG00000038584	olfactomedin 1	OLFM1	-1.19256	-0.0864092	0.000360799	0.0140733	-2.28558
ENSBTAG00000039932	hypothetical protein LOC100139209; leukocyte immunoglobulin-like receptor, subfamily A (with TM domain), member 4		-1.18313	3.00433	5.10775e-05	0.00429795	-2.27069
ENSBTAG00000016208	transglutaminase 2 (C polypeptide, protein-glutamine-gamma-glutamyltransferase)	TGM2	-1.181	4.19227	1.5182e-06	0.000344469	-2.26734
ENSBTAG00000012208	MHC class I heavy chain		-1.16355	6.35464	5.12969e-06	0.000880782	-2.24008
ENSBTAG00000007191	chemokine (C-C motif) ligand 5	CCL5	-1.16107	5.08445	2.17724e-09	1.729e-06	-2.23623
ENSBTAG00000027205	PiggyBac transposable element-derived protein 5	PGBD5	-1.13785	0.359895	0.00013459	0.00737114	-2.20052
ENSBTAG00000021807	tachykinin 3	TAC3	-1.13467	5.4694	0.00514537	0.0687313	-2.19569
ENSBTAG00000011582	serine incorporator 2	SERINC2	-1.12852	4.51923	2.22164e-08	1.17617e-05	-2.18635
ENSBTAG00000011882	solute carrier family 24 (sodium/potassium/calcium exchanger), member 3	SLC24A3	-1.12761	2.93506	2.89596e-09	2.16447e-06	-2.18497
ENSBTAG00000011137	MORN repeat containing 4	MORN4	-1.12479	1.3352	1.95454e-05	0.00214089	-2.18069
ENSBTAG00000006683	zinc finger, FYVE domain containing 28	ZFYVE28	-1.11933	1.50827	0.00514342	0.0687313	-2.17247
ENSBTAG00000002069	MHC class I heavy chain	BOLA	-1.11539	10.7901	1.39983e-19	1.77862e-15	-2.16653
ENSBTAG00000014497	G protein-coupled receptor 31	GPR31	-1.11264	-0.457624	0.00300676	0.0520489	-2.16241
ENSBTAG00000017328	spleen trypsin inhibitor; pancreatic trypsin inhibitor	PTI	-1.08026	8.95488	0.000233518	0.0104791	-2.11442
ENSBTAG00000026769	achaete-scute complex homolog 2 (Drosophila)	ASCL2	-1.07595	-0.181648	3.37622e-05	0.00317765	-2.10811
ENSBTAG00000017574	lamin A/C	LMNA	-1.07339	4.15281	0.000121333	0.00694437	-2.10437
ENSBTAG00000012030	tubulin tyrosine ligase-like family, member 1	TTLL1	-1.06495	4.67245	0.00303827	0.0522647	-2.0921
ENSBTAG00000001154	diacylglycerol O-acyltransferase homolog 2 (mouse)	DGAT2	-1.06388	6.79573	0.000533879	0.0177114	-2.09054
ENSBTAG00000033748	interleukin 18 receptor accessory protein	IL18RAP	-1.06122	3.03293	6.58569e-05	0.00475442	-2.0867
ENSBTAG00000025250	chemokine (C-C motif) ligand 3	CCL3 (annotated CCL3L3 in IPA)	-1.06005	1.83697	1.50217e-05	0.0017838	-2.08501
ENSBTAG00000006392	tetratricopeptide repeat domain 7B	TTC7B	-1.05933	0.532514	1.95065e-06	0.000427327	-2.08397
ENSBTAG00000003528	similar to EGF-like module-containing mucin-like hormone receptor-like 2 precursor (EGF-like module EMR2) (CD312 antigen)		-1.05584	0.888795	0.000199625	0.00945244	-2.07892
ENSBTAG00000003033	growth arrest and DNA-damage-inducible, gamma	GADD45G	-1.05211	1.22337	0.000103127	0.00629969	-2.07356
ENSBTAG00000020430	glycosyltransferase 1 domain containing 1	GLT1D1	-1.04065	0.824602	9.8758e-05	0.00619368	-2.05716
ENSBTAG00000000793	laminin, gamma 2	LAMC2	-1.03832	0.350217	0.00553015	0.0714141	-2.05383
ENSBTAG00000010146	plexin B3	PLXNB3	-1.03467	0.200465	0.000607662	0.0192063	-2.04865
ENSBTAG00000004608	similar to Myeloid cell surface antigen CD33 precursor (Sialic acid-binding Ig-like lectin 3) (Siglec-3) (gp67)		-1.0306	3.58938	6.52619e-05	0.00473838	-2.04287
ENSBTAG00000033727	RNA binding protein with multiple splicing	RBPMS	-1.02612	1.67513	3.01699e-06	0.000608475	-2.03653
ENSBTAG00000020729	dehydrogenase/reductase (SDR family) member 7	DHRS7	-0.995202	4.78136	1.28723e-12	8.14475e-09	-1.99336
ENSBTAG00000017661	regulatory factor X, 2 (influences HLA class II expression)	RFX2	-0.993307	3.46408	1.15988e-07	4.91247e-05	-1.99074
ENSBTAG00000039555	cytochrome c oxidase subunit VIIc	COX7C	-0.991555	3.6247	3.49961e-09	2.47033e-06	-1.98833
ENSBTAG00000008868	calpain 3, (p94)	CAPN3	-0.976071	2.98185	0.000283396	0.0115862	-1.9671
ENSBTAG00000011182	PDZ and LIM domain 1	PDLIM1	-0.972467	5.2092	0.000266531	0.0112505	-1.96219
ENSBTAG00000048155	ficolin-2	FCN2	-0.971405	9.56315	0.000205842	0.00965105	-1.96075
ENSBTAG00000027126	mucin 15, cell surface associated	MUC15	-0.965143	0.350187	0.00498609	0.0672238	-1.95226
ENSBTAG00000002006	thrombospondin 1	THBS1	-0.964925	5.42518	0.000801977	0.0228603	-1.95196
ENSBTAG00000022807	hypothetical LOC783173; killer cell immunoglobulin-like receptor, three domains, short cytoplasmic tail, 1		-0.964286	0.693155	0.00902834	0.0967288	-1.9511
ENSBTAG00000019348	not annotated		-0.962166	5.03706	3.1479e-05	0.00300731	-1.94823
ENSBTAG00000035081	not annotated		-0.95701	4.17808	6.06054e-06	0.000987247	-1.94128
ENSBTAG00000020990	purinergic receptor P2Y, G-protein coupled, 14	P2RY14	-0.950264	0.709619	0.00149564	0.0333158	-1.93223
ENSBTAG00000039892	not annotated		-0.94627	2.76569	0.0010034	0.0262328	-1.92688
ENSBTAG00000008248	dystrophin	DMD	-0.93142	0.674559	0.0001343	0.00737114	-1.90715
ENSBTAG00000047175	glycoprotein VI (platelet)	GP6	-0.927432	2.44978	0.000234226	0.0104791	-1.90189
ENSBTAG00000015743	guanosine monophosphate reductase	GMPR	-0.922947	2.13415	0.000969235	0.0256403	-1.89598
ENSBTAG00000023186	mitochondrial ribosomal protein S17		-0.917382	0.406431	0.000712598	0.021509	-1.88868
ENSBTAG00000004043	Fc gamma 2 receptor		-0.913958	7.38979	5.27381e-09	3.35045e-06	-1.88421
ENSBTAG00000013366	nuclear receptor interacting protein 3	NRIP3	-0.907966	2.27518	0.000863644	0.0237346	-1.8764
ENSBTAG00000011037	RNA binding protein with multiple splicing 2	RBPMS2	-0.906987	0.756098	0.000617631	0.0193717	-1.87513
ENSBTAG00000026944	not annotated		-0.906823	3.96539	0.00085034	0.0235904	-1.87491
ENSBTAG00000030973	tubulin, alpha 3c	TUBA1D	-0.900824	-0.160289	0.00115118	0.0279977	-1.86713
ENSBTAG00000031265	SVOP-like	SVOPL	-0.894862	-0.295177	0.00386518	0.0592882	-1.85943
ENSBTAG00000040279	keratin 24	KRT24	-0.886398	0.340086	0.00475188	0.0660584	-1.84856
ENSBTAG00000001001	ankyrin repeat domain 55; similar to ankyrin repeat domain 55	ANKRD55	-0.885627	0.250818	0.00164451	0.0349113	-1.84757
ENSBTAG00000012338	fumarylacetoacetate hydrolase (fumarylacetoacetase)	FAH	-0.882023	1.09734	1.90171e-05	0.00210114	-1.84296
ENSBTAG00000003510	multimerin 2	MMRN2	-0.871434	-0.20811	0.0007405	0.0219319	-1.82948
ENSBTAG00000030317	protein phosphatase 1, regulatory subunit 26	PPP1R26	-0.866741	0.980418	0.000330918	0.0130579	-1.82354
ENSBTAG00000001537	tsukushin	TSKU	-0.865962	1.56064	0.000551522	0.0179683	-1.82255
ENSBTAG00000005163	S100 calcium binding protein A1	S1 A1	-0.864871	3.06542	0.00404405	0.0605225	-1.82118
ENSBTAG00000008313	Kruppel-like factor 15	KLF15	-0.863658	1.06136	4.14158e-05	0.00368407	-1.81965
ENSBTAG00000019018	similar to interferon-induced protein 1-8U; interferon induced transmembrane protein 3 (1-8U)		-0.862409	7.36606	0.00016642	0.00835785	-1.81807
ENSBTAG00000034220	cyclin-dependent kinase inhibitor 2A (melanoma, p16, inhibits CDK4)	CDKN2A	-0.86035	-0.207865	0.00362699	0.0576201	-1.81548
ENSBTAG00000015434	destrin (actin depolymerizing factor)	DSTN	-0.859245	3.96756	0.00145625	0.0325186	-1.81409
ENSBTAG00000004472	TCTEL1 protein	DYNLT1	-0.857781	6.17583	1.38892e-06	0.000327347	-1.81225
ENSBTAG00000005791	uroporphyrinogen III synthase	UROS	-0.857749	4.04069	2.3124e-07	9.47785e-05	-1.81221
ENSBTAG00000010155	regakine 1		-0.853033	2.56747	0.00392411	0.0593569	-1.80629
ENSBTAG00000004263	ATPase, H+ transporting, lysosomal V0 subunit a4	ATP6V A4	-0.8518	3.18178	0.00117213	0.028422	-1.80475
ENSBTAG00000016152	disabled homolog 2, mitogen-responsive phosphoprotein (Drosophila)	DAB2	-0.849503	2.06505	0.00196449	0.0388193	-1.80188
ENSBTAG00000008625	pleckstrin homology domain containing, family F (with FYVE domain) member 1	PLEKHF1	-0.844431	1.028	1.34629e-05	0.00166078	-1.79556
ENSBTAG00000019728	CD164 sialomucin-like 2	CD164L2	-0.840586	-0.216481	0.0021473	0.0412316	-1.79078
ENSBTAG00000014546	C-type lectin domain family 7, member A	CLEC7A	-0.839843	2.60119	0.00351448	0.0567407	-1.78986
ENSBTAG00000010238	leukotriene B4 receptor	LTB4R	-0.829655	1.72057	5.89717e-05	0.00451785	-1.77726
ENSBTAG00000021176	cysteine-rich secretory protein LCCL domain containing 2	CRISPLD2	-0.826705	5.34564	0.000447783	0.0159126	-1.77363
ENSBTAG00000003806	extracellular matrix protein 1	ECM1	-0.826524	6.15995	0.000153279	0.00785309	-1.77341
ENSBTAG00000012265	Von Willebrand factor precursor	VWF	-0.824516	5.3397	0.00483167	0.0665848	-1.77094
ENSBTAG00000014687	tumor protein p53 inducible protein 13	TP53I13	-0.820927	1.02151	0.00150327	0.0333882	-1.76654
ENSBTAG00000015094	vanin 1	VNN1	-0.819165	4.65967	0.00479843	0.0663425	-1.76438
ENSBTAG00000013496	carboxypeptidase M	CPM	-0.81862	3.69925	0.000753345	0.0220152	-1.76372
ENSBTAG00000010068	receptor accessory protein 2	REEP2	-0.815677	4.21244	2.37659e-05	0.00251641	-1.76012
ENSBTAG00000009873	neuritin 1	NRN1	-0.813822	3.24285	0.000192954	0.00932197	-1.75786
ENSBTAG00000046981	supervillin	SVIL	-0.810694	5.80271	9.73967e-08	4.26732e-05	-1.75406
ENSBTAG00000008353	cyclin-dependent kinase inhibitor 1A (p21, Cip1)	CDKN1A	-0.809112	4.26155	3.35777e-05	0.00317765	-1.75213
ENSBTAG00000013759	similar to tetraspanin 9	TSPAN9	-0.802452	0.271085	0.000529153	0.017635	-1.74406
ENSBTAG00000020872	complement component 5a receptor 1	C5AR1	-0.797645	6.59794	5.74609e-05	0.00451785	-1.73826
ENSBTAG00000006662	ADAMTS-like 5		-0.795326	0.820526	0.00138669	0.0315192	-1.73547
ENSBTAG00000014011	tropomodulin 2 (neuronal)	TMOD2	-0.795139	-0.516187	0.00791683	0.0894209	-1.73524
ENSBTAG00000007834	protein phosphatase 1, regulatory (inhibitor) subunit 16A	PPP1R16A	-0.793504	1.15447	0.00028359	0.0115862	-1.73328
ENSBTAG00000002555	PDZK1 interacting protein 1	PDZK1IP1	-0.79173	2.62876	0.000414948	0.0152379	-1.73115
ENSBTAG00000015160	phospholipase D family, member 4	PLD4	-0.79157	7.36113	1.10537e-06	0.00027722	-1.73096
ENSBTAG00000021361	sterile alpha motif domain containing 3	SAMD3	-0.790473	2.05938	5.05144e-05	0.00427891	-1.72964
ENSBTAG00000035654	similar to Dynein light chain Tctex-type 1 (T-complex testis-specific protein 1 homolog) (Protein CW-1)		-0.789507	3.30591	3.87043e-05	0.00353797	-1.72848
ENSBTAG00000012815	C-type lectin domain family 12, member A	CLEC12A	-0.787666	6.43179	7.78558e-05	0.0053717	-1.72628
ENSBTAG00000016357	vanin 2	VNN2	-0.785468	8.4168	6.82577e-07	0.000202324	-1.72365
ENSBTAG00000046337	tubulin, beta 6 class V	TUBB6	-0.784471	3.17775	0.00027146	0.0113088	-1.72246
ENSBTAG00000030426	not annotated		-0.780925	3.42231	0.000160498	0.00813104	-1.71823
ENSBTAG00000019386	non-classical MHC class I antigen	BOLA-NC	-0.779443	8.75528	0.000104883	0.00631585	-1.71647
ENSBTAG00000001242	adrenergic, beta-1-, receptor	ADRB1	-0.777798	0.359684	0.00489016	0.0667874	-1.71451
ENSBTAG00000021616	serine protease 1-like protein 1 precursor	PRSS57	-0.771878	1.27223	0.00016994	0.00838942	-1.70749
ENSBTAG00000013755	integrin, beta 5	ITGB5	-0.768025	2.34996	9.02351e-05	0.00584963	-1.70294
ENSBTAG00000020236	N-terminal EF-hand calcium binding protein 2	NECAB2	-0.767855	0.718682	0.00806473	0.0902707	-1.70274
ENSBTAG00000038141	G protein-coupled receptor 56		-0.767786	4.30014	0.0012589	0.0292959	-1.70266
ENSBTAG00000002100	granzyme M (lymphocyte met-ase 1)	GZMM	-0.761812	2.12061	0.000909386	0.0245322	-1.69562
ENSBTAG00000017846	F11 receptor	F11R	-0.761209	4.54332	0.00120726	0.0287795	-1.69491
ENSBTAG00000046409	early growth response 2	EGR2	-0.760725	2.48829	0.000494252	0.0168816	-1.69434
ENSBTAG00000043224	small nucleolar RNA SNORD95	SNORD95	-0.759729	-0.23009	0.00857797	0.093716	-1.69317
ENSBTAG00000011473	myosin, light chain 9, regulatory	MYL9	-0.755567	6.83711	0.000104192	0.00631585	-1.68829
ENSBTAG00000045492	angiogenin, ribonuclease, RNase A family, 5; Angiogenin-1; Ribonuclease A A1	ANG	-0.754855	4.97559	0.000215835	0.00993622	-1.68746
ENSBTAG00000027444	supervillin	SVIL	-0.753873	5.91493	4.30942e-05	0.00380246	-1.68631
ENSBTAG00000019822	tubulin polymerization-promoting protein family member 3	TPPP3	-0.749207	5.88493	7.60899e-05	0.00528305	-1.68087
ENSBTAG00000004394	protein kinase (cAMP-dependent, catalytic) inhibitor beta	PKIB	-0.748561	4.65326	0.000231379	0.0104254	-1.68012
ENSBTAG00000030749	DNAJC6 protein; DnaJ (Hsp40) homolog, subfamily C, member 6	DNAJC6	-0.747798	1.08309	0.000666956	0.020519	-1.67923
ENSBTAG00000001814	plexin D1	PLXND1	-0.745643	5.63013	0.000199877	0.00945244	-1.67672
ENSBTAG00000001497	muscle RAS oncogene homolog	MRAS	-0.744477	2.78195	6.91304e-06	0.00109796	-1.67537
ENSBTAG00000037735	G protein-coupled receptor 77	GPR77	-0.743514	5.68958	0.00010922	0.00646966	-1.67425
ENSBTAG00000007286	similar to histone cluster 1, H2ad		-0.742431	-0.0509699	0.0074421	0.085963	-1.67299
ENSBTAG00000008100	golgi autoantigen, golgin subfamily a, 7B	GOLGA7B	-0.742383	1.38734	0.000297573	0.0120413	-1.67294
ENSBTAG00000009812	chemokine (C-X-C motif) ligand 5/6 - not annotated properly yet	CXCL6 (annotated CXCL5 in IPA)	-0.741209	0.51253	0.00468379	0.065334	-1.67158
ENSBTAG00000001388	neuromedin B	NMB	-0.740583	1.27856	0.000756266	0.0220152	-1.67085
ENSBTAG00000008294	potassium inwardly-rectifying channel, subfamily J, member 2	KCNJ2	-0.736698	4.49005	0.000755227	0.0220152	-1.66636
ENSBTAG00000045529	natural cytotoxicity triggering receptor 1	NCR1	-0.734978	3.30552	0.000158801	0.0081033	-1.66437
ENSBTAG00000046323	not annotated		-0.734654	2.61115	0.00369331	0.0576812	-1.664
ENSBTAG00000004722	THUMP domain containing 2	THUMPD2	-0.731507	3.08505	2.66886e-05	0.00268768	-1.66037
ENSBTAG00000020178	arylsulfatase family, member K	ARSK	-0.730424	-0.0615454	0.0047832	0.0662354	-1.65913
ENSBTAG00000012742	solute carrier family 22, member 18	SLC22A18	-0.728821	1.71307	0.000209364	0.0097174	-1.65728
ENSBTAG00000011324	elastin microfibril interfacer 1	EMILIN1	-0.726982	1.76011	0.00819966	0.0910944	-1.65517
ENSBTAG00000045861	T cell-interacting, activating receptor on myeloid cells 1	TARM1	-0.724419	4.4698	0.00873046	0.0948176	-1.65224
ENSBTAG00000002333	HOP homeobox	HOP	-0.723964	5.21315	1.92825e-08	1.06523e-05	-1.65171
ENSBTAG00000016549	leucine rich repeat containing 16A	LRRC16A	-0.720858	1.25079	0.00253851	0.0463769	-1.64816
ENSBTAG00000039197	solute carrier family 2 (facilitated glucose transporter), member 9	SLC2A9	-0.716817	4.37774	0.000536122	0.0177395	-1.64355
ENSBTAG00000009568	KN motif and ankyrin repeat domains 2	KANK2	-0.714775	1.33687	0.00112977	0.0276586	-1.64123
ENSBTAG00000007654	carbohydrate (N-acetylglucosamine 6-O) sulfotransferase 7	CHST7	-0.714338	0.91278	0.000400981	0.0150736	-1.64073
ENSBTAG00000012029	killer cell lectin-like receptor subfamily B, member 1	KLRB1	-0.712301	2.88957	0.000737456	0.0218928	-1.63841
ENSBTAG00000012822	hypothetical protein MGC137036	MGC137 36	-0.707451	0.0941353	0.00552262	0.0714141	-1.63292
ENSBTAG00000005078	ubiquitin carboxyl-terminal esterase L1 (ubiquitin thiolesterase)	UCHL1	-0.705201	2.45861	0.00155936	0.0341607	-1.63037
ENSBTAG00000003544	sphingosine-1-phosphate receptor 5	S1PR5	-0.705128	3.656	2.30333e-06	0.000496035	-1.63029
ENSBTAG00000006549	family with sequence similarity 26, member F	FAM26F	-0.704906	2.91197	0.00270843	0.0484012	-1.63004
ENSBTAG00000047904	not annotated		-0.704722	4.07422	0.00123717	0.0290026	-1.62983
ENSBTAG00000037632	hypothetical protein LOC100137867		-0.701483	0.0664002	0.0068507	0.0812734	-1.62618
ENSBTAG00000009390	family with sequence similarity 188, member B	FAM188B	-0.699752	0.454752	0.00158494	0.0344555	-1.62423
ENSBTAG00000007890	SEC14-like 5 (S. cerevisiae)	SEC14L5	-0.69847	1.61792	0.00910281	0.097045	-1.62278
ENSBTAG00000002340	STEAP family member 4	STEAP4	-0.696087	5.21177	0.00633628	0.0778614	-1.6201
ENSBTAG00000008483	calcitonin receptor-like	CALCRL	-0.695439	4.73132	7.16754e-06	0.00112433	-1.61938
ENSBTAG00000011873	potassium voltage-gated channel, Isk-related family, member 3	KCNE3	-0.69528	1.91139	0.000209552	0.0097174	-1.6192
ENSBTAG00000037537	similar to sialic acid binding Ig-like lectin 5	SIGLEC8	-0.687776	2.71689	0.0026369	0.0475915	-1.6108
ENSBTAG00000019521	cytochrome c oxidase subunit VIa polypeptide 2	COX6A2	-0.687578	-0.0362737	0.000881615	0.0240382	-1.61058
ENSBTAG00000003826	sodium channel, voltage-gated, type I, beta	SCN1B	-0.686235	0.215143	0.00776599	0.088671	-1.60908
ENSBTAG00000017310	chromosome 21 open reading frame 63 ortholog	EVA1C	-0.68596	2.82303	1.59231e-05	0.00185614	-1.60877
ENSBTAG00000015311	protein tyrosine phosphatase, receptor type, R	PTPRR	-0.68548	2.42374	0.000477991	0.0166393	-1.60824
ENSBTAG00000018513	four and a half LIM domains 1	FHL1	-0.68388	6.99358	8.24533e-05	0.00545986	-1.60645
ENSBTAG00000006921	ATP-binding cassette, sub-family A (ABC1), member 6	ABCA6	-0.683428	6.03386	0.00165132	0.0349113	-1.60595
ENSBTAG00000000942	signal-induced proliferation-associated 1 like 2	SIPA1L2	-0.680263	1.01986	0.00761971	0.0876164	-1.60243
ENSBTAG00000015296	protein tyrosine phosphatase, receptor type, B	PTPRB	-0.673414	1.30253	0.00622506	0.0770046	-1.59484
ENSBTAG00000019612	ribonuclease, RNase A family, 4	RNASE4	-0.673079	5.87452	0.000257068	0.0110348	-1.59447
ENSBTAG00000008817	laminin, alpha 4	LAMA4	-0.671805	3.5602	0.00174056	0.0360188	-1.59306
ENSBTAG00000038981	similar to EMR4		-0.670231	3.29135	0.000490388	0.0168402	-1.59133
ENSBTAG00000007870	FK506 binding protein 14, 22 kDa	FKBP14	-0.668875	3.71412	0.00340984	0.0560576	-1.58983
ENSBTAG00000012504	growth arrest-specific 2 like 1	GAS2L1	-0.668694	4.38724	0.000544043	0.0178751	-1.58963
ENSBTAG00000002937	EGF-like module-containing mucin-like hormone receptor-like 3 precursor (EGF-like module-containing mucin-like receptor EMR3)	EMR3	-0.668261	6.29077	0.0066106	0.0803005	-1.58916
ENSBTAG00000010033	similar to cytochrome P450, family 2, subfamily J		-0.66577	2.83493	0.00942637	0.0992307	-1.58642
ENSBTAG00000001333	peroxisome proliferator-activated receptor gamma	PPARG	-0.658768	2.48523	0.000168229	0.00837668	-1.57873
ENSBTAG00000011820	death-associated protein kinase 2	DAPK2	-0.65873	3.17916	0.000149079	0.00779504	-1.57869
ENSBTAG00000000033	phosphatase, orphan 1	PHOSPHO1	-0.657648	3.48005	0.00167207	0.0352912	-1.57751
ENSBTAG00000012855	lipoprotein lipase	LPL	-0.657642	5.02296	0.00618183	0.0767804	-1.5775
ENSBTAG00000011278	xylulokinase homolog (H. influenzae)	XYLB	-0.657581	2.03147	0.00103143	0.0262594	-1.57744
ENSBTAG00000006143	cAMP responsive element binding protein 3-like 1	CREB3L1	-0.654974	4.30138	0.00142318	0.0319486	-1.57459
ENSBTAG00000001286	engulfment and cell motility 3	ELMO3	-0.654667	1.67385	0.00917101	0.0974305	-1.57425
ENSBTAG00000020520	RAS, dexamethasone-induced 1	RASD1	-0.654371	3.02517	0.000438251	0.0157165	-1.57393
ENSBTAG00000000820	guanine nucleotide binding protein (G protein), gamma 11	GNG11	-0.650174	4.50871	0.000385891	0.01468	-1.56936
ENSBTAG00000038042	interleukin 8 receptor, beta	CXCR2	-0.648856	5.85656	0.00802858	0.0900434	-1.56792
ENSBTAG00000007740	midkine (neurite growth-promoting factor 2)	BMK	-0.647072	3.54723	0.0038804	0.0592882	-1.56599
ENSBTAG00000002348	solute carrier family 4, sodium bicarbonate cotransporter, member 4	SLC4A4	-0.646991	2.85056	0.00307342	0.0527002	-1.5659
ENSBTAG00000047116	tubulin polymerization promoting protein	TPPP	-0.646611	2.01031	0.00103134	0.0262594	-1.56549
ENSBTAG00000031814	serine dehydratase	SDS	-0.644607	10.733	0.00611191	0.0761352	-1.56331
ENSBTAG00000019321	dihydrouridine synthase 1-like (S. cerevisiae); similar to Coiled-coil domain containing 57	CCDC57	-0.643179	4.92442	0.00123457	0.0290026	-1.56177
ENSBTAG00000020602	indoleamine 2,3-dioxygenase 1	IDO1	-0.64303	7.12184	0.000186104	0.00905989	-1.56161
ENSBTAG00000021958	granzyme A (granzyme 1, cytotoxic T-lymphocyte-associated serine esterase 3)	GZMA	-0.639918	4.36889	0.00104051	0.0263289	-1.55824
ENSBTAG00000008792	ribonuclease, RNase A family, k6	RNASE6	-0.639279	7.88926	0.000145184	0.00771846	-1.55755
ENSBTAG00000031184	cyclin-dependent kinase inhibitor 1C (p57, Kip2)	CDKN1C	-0.639127	-0.114958	0.00810951	0.0904648	-1.55739
ENSBTAG00000044010	embigin homolog	EMB	-0.636562	3.85337	0.00176396	0.0363255	-1.55462
ENSBTAG00000007206	striatin interacting protein 2	STRIP2	-0.628246	3.15351	0.00255585	0.0465252	-1.54569
ENSBTAG00000003607	family with sequence similarity 20, member C	FAM2 C	-0.628219	2.30924	0.00697608	0.0819295	-1.54566
ENSBTAG00000002283	frizzled homolog 7 (Drosophila)	FZD7	-0.626272	0.40828	0.00268747	0.0482302	-1.54357
ENSBTAG00000015115	acid phosphatase, testicular	ACPT	-0.626185	0.496511	0.00363223	0.0576201	-1.54348
ENSBTAG00000030974	tubulin, alpha 4a	TUBA4A	-0.625979	7.72358	1.65955e-06	0.000369934	-1.54326
ENSBTAG00000001112	spermine oxidase	SMOX	-0.624742	2.82909	0.000684999	0.0209725	-1.54193
ENSBTAG00000038149	NLR family, pyrin domain containing 12	NLRP12	-0.62447	4.12636	0.00916204	0.0974166	-1.54164
ENSBTAG00000018316	zinc finger, MYND-type containing 15	ZMYND15	-0.624347	0.991377	0.000280671	0.0115411	-1.54151
ENSBTAG00000001321	interleukin 1, beta	IL1B	-0.620081	6.74301	0.00627628	0.0774237	-1.53696
ENSBTAG00000010801	carboxymethylenebutenolidase homolog (Pseudomonas)	CMBL	-0.616485	4.30038	9.26349e-05	0.00591467	-1.53314
ENSBTAG00000021953	like-glycosyltransferase; like-glycosyltransferase	LARGE	-0.611901	2.02967	0.000501562	0.0169837	-1.52827
ENSBTAG00000044194	zinc finger, DHHC-type containing 2	ZDHHC2	-0.610468	2.83742	0.00347444	0.0563808	-1.52675
ENSBTAG00000012820	syntaxin 3	STX3	-0.60922	2.99742	0.000223605	0.0102199	-1.52543
ENSBTAG00000016504	not annotated		-0.608428	3.18773	0.000193764	0.00932561	-1.5246
ENSBTAG00000021469	Cortactin-binding protein 2 (CortBP2)	CTTNBP2	-0.608064	2.6747	0.000142304	0.00762659	-1.52421
ENSBTAG00000017970	zyxin	ZYX	-0.600813	9.44865	3.80007e-09	2.54125e-06	-1.51657
ENSBTAG00000012228	sema domain, immunoglobulin domain (Ig), transmembrane domain (TM) and short cytoplasmic domain, (semaphorin) 4A	SEMA4A	-0.600753	6.10734	3.56781e-08	1.81331e-05	-1.51651
ENSBTAG00000021036	membrane-associated ring finger (C3HC4) 2	MARCH2	-0.599936	5.61999	0.000375262	0.0144487	-1.51565
ENSBTAG00000016109	dehydrogenase/reductase (SDR family) member 12	DHRS12	-0.594042	2.51377	0.000908103	0.0245322	-1.50947
ENSBTAG00000031725	tumor necrosis factor-like weak inducer of apoptosis	TNFSF12	-0.592106	3.43707	0.000180743	0.00886687	-1.50745
ENSBTAG00000018572	fms-related tyrosine kinase 3	FLT3	-0.587835	2.58671	0.000867944	0.0237674	-1.50299
ENSBTAG00000009477	pirin (iron-binding nuclear protein)	PIR	-0.58716	2.99921	0.000105566	0.00632702	-1.50229
ENSBTAG00000020350	dual specificity phosphatase 2	DUSP2	-0.58671	6.41834	9.99247e-05	0.00619368	-1.50182
ENSBTAG00000020554	allograft inflammatory factor 1	AIF1	-0.585616	6.98978	0.000150128	0.00781773	-1.50068
ENSBTAG00000010961	Lyrm7 homolog (mouse)	LYRM7	0.59046	2.23104	0.000408274	0.0152212	1.50573
ENSBTAG00000012808	mannan-binding lectin serine peptidase 2	MASP2	0.592531	4.38007	0.00286204	0.0502218	1.50789
ENSBTAG00000005170	Adhesion G protein-coupled receptor G5	GPR114	0.595793	5.01009	0.00181188	0.0367759	1.5113
ENSBTAG00000011374	sphingosine-1-phosphate receptor 3	S1PR3	0.59702	1.08667	0.00733169	0.0853081	1.51259
ENSBTAG00000006161	met proto-oncogene (hepatocyte growth factor receptor)	C-MET	0.60362	3.71267	0.00200817	0.0393763	1.51952
ENSBTAG00000017564	cingulin	CGN	0.607455	1.98689	0.000917267	0.0245882	1.52357
ENSBTAG00000048213	not annotated	PTCH1	0.613297	0.954039	0.00377313	0.0584612	1.52975
ENSBTAG00000012391	hypothetical protein LOC524749	FAM63B	0.616	4.15703	0.000828306	0.0231497	1.53262
ENSBTAG00000040046			0.622234	3.00686	0.00409898	0.0607423	1.53926
ENSBTAG00000047996	interferon induced transmembrane protein 10	IFITM1	0.622328	3.61108	0.00122845	0.0290026	1.53936
ENSBTAG00000015984	cell adhesion molecule 4	CADM4	0.625677	2.03243	0.00760715	0.0875512	1.54293
ENSBTAG00000015666	not annotated		0.627401	1.34784	0.00186961	0.0374099	1.54478
ENSBTAG00000004674	3-hydroxyanthranilate 3,4-dioxygenase; similar to 3-hydroxyanthranilate 3,4-dioxygenase	HAAO	0.628485	1.9814	0.00197095	0.0388587	1.54594
ENSBTAG00000016032	sulfotransferase family, cytosolic, 1C, member 2		0.629175	3.35764	0.00766596	0.0880684	1.54668
ENSBTAG00000014100	BAI1-associated protein 3	BAIAP3	0.629914	1.00274	0.00349992	0.0566496	1.54747
ENSBTAG00000007996	5-hydroxytryptamine (serotonin) receptor 6	HTR6	0.630329	1.24419	0.00847056	0.0931198	1.54792
ENSBTAG00000019217	kinesin-like protein KIF13A	KIF13A	0.630362	5.61933	9.50267e-05	0.00600701	1.54795
ENSBTAG00000012854	gasdermin B	GSDMB	0.633485	3.6755	0.000324852	0.0128987	1.55131
ENSBTAG00000005019	protease, serine, 50	PRSS5	0.638486	1.71034	0.00715969	0.0836082	1.55669
ENSBTAG00000025812	not annotated		0.64254	4.0045	0.00124212	0.0290196	1.56107
ENSBTAG00000005828	c-mer proto-oncogene tyrosine kinase	MERTK	0.642924	3.03723	0.00089507	0.0243008	1.56149
ENSBTAG00000004413	Rho-related BTB domain containing 3	RHOBTB3	0.645943	-0.101328	0.00251148	0.0460812	1.56476
ENSBTAG00000016849	poly(A) binding protein, cytoplasmic 1-like	PABPC1L	0.646142	0.982321	0.00581561	0.0733794	1.56498
ENSBTAG00000009216	hydrogen voltage-gated channel 1	HVCN1	0.646318	6.36078	0.000189349	0.00918271	1.56517
ENSBTAG00000039206	schlafen family member 14	SLFN14	0.649187	2.7072	0.00128187	0.0296135	1.56828
ENSBTAG00000000462	coiled-coil domain containing 102A	CCDC1 2A	0.650921	3.17703	0.00363365	0.0576201	1.57017
ENSBTAG00000046367	not annotated		0.654064	0.815997	0.0018186	0.0368061	1.57359
ENSBTAG00000013920	cilia and flagella associated protein 44	CFAP44	0.657307	0.942232	0.00341646	0.0560576	1.57714
ENSBTAG00000037945	CASK interacting protein 1	CASKIN1	0.659065	1.88189	0.00284673	0.0500977	1.57906
ENSBTAG00000001061	protein kinase C, alpha	PRKCA	0.659484	4.25215	4.70468e-06	0.000830246	1.57952
ENSBTAG00000046157	not annotated		0.669436	0.771019	0.00277224	0.0491956	1.59045
ENSBTAG00000035995	tumor necrosis factor, alpha-induced protein 2	TNFAIP2	0.674697	7.119	0.000618992	0.0193717	1.59626
ENSBTAG00000013420	fibronectin type III and SPRY domain containing 1-like	FSD1L	0.681973	0.713262	0.00556865	0.0716146	1.60433
ENSBTAG00000006974	pleckstrin homology domain containing, family A member 7	PLEKHA7	0.684856	0.0789103	0.00309968	0.0530075	1.60754
ENSBTAG00000018808	solute carrier family 25, member 35	SLC25A35	0.68502	2.14867	3.22586e-06	0.000640435	1.60772
ENSBTAG00000014508	F-box only protein 40 (Muscle disease-related protein)	FBXO4	0.68785	2.6861	0.000545847	0.0178751	1.61088
ENSBTAG00000005805	epoxide hydrolase 4	ABHD7	0.688675	2.37399	0.00144843	0.032458	1.6118
ENSBTAG00000021517	transmembrane protein 216	TMEM216	0.695492	1.84187	0.00362814	0.0576201	1.61944
ENSBTAG00000002477	FtsJ homolog 2 (E. coli)	FTSJ2	0.700293	4.96607	3.87752e-06	0.000735341	1.62484
ENSBTAG00000039969	not annotated		0.700481	0.812763	9.32698e-05	0.00592543	1.62505
ENSBTAG00000045886	StAR-related lipid transfer (START) domain containing 4	STARD4	0.701365	3.52949	1.74622e-05	0.00198103	1.62604
ENSBTAG00000005378	XK, Kell blood group complex subunit-related, X-linked	XKRX	0.707336	1.92205	0.00117761	0.0285005	1.63279
ENSBTAG00000001325	ureidopropionase, beta	UPB1	0.708531	2.29628	0.00891302	0.0963	1.63414
ENSBTAG00000006770	Mdm2, transformed 3T3 cell double minute 2, p53 binding protein (mouse) binding protein, 104kDa	MTBP	0.709864	3.95567	2.11743e-05	0.00228	1.63565
ENSBTAG00000003835	bone morphogenetic protein 4	BMP4	0.713482	1.78256	0.00337552	0.0560218	1.63976
ENSBTAG00000009994	echinoderm microtubule associated protein like 5	EML5	0.717336	3.46412	0.00172507	0.0359034	1.64414
ENSBTAG00000020750	AF4/FMR2 family, member 2	AFF2	0.722144	1.16284	0.00347227	0.0563808	1.64963
ENSBTAG00000024947	testicular cell adhesion molecule 1 homolog (mouse)		0.723167	0.973323	0.000570754	0.0184061	1.6508
ENSBTAG00000015644	EP300 interacting inhibitor of differentiation 2	EID2	0.724729	-0.0435032	0.000567858	0.0183621	1.65259
ENSBTAG00000012966	secernin 3	SCRN3	0.726355	3.45569	0.00221156	0.0420031	1.65445
ENSBTAG00000022580	chromosome 1 open reading frame 183 ortholog	FAM212B	0.726623	0.463058	0.000160624	0.00813104	1.65476
ENSBTAG00000014602	calmodulin binding transcription activator 1	CAMTA1	0.726881	1.29244	0.000916096	0.0245882	1.65506
ENSBTAG00000013791	free fatty acid receptor 3	GPR41	0.730655	2.67521	0.00453226	0.0639855	1.65939
ENSBTAG00000002781	glucosaminyl (N-acetyl) transferase 4, core 2 (beta-1,6-N-acetylglucosaminyltransferase)	GCNT4	0.732974	3.06933	1.05315e-05	0.00145449	1.66206
ENSBTAG00000004076	oxoeicosanoid (OXE) receptor 1	OXER1	0.73298	-0.159629	0.00286576	0.0502218	1.66207
ENSBTAG00000006937	ATP-binding cassette, sub-family A (ABC1), member 10	ABCA1	0.733344	4.16387	0.000621007	0.019387	1.66249
ENSBTAG00000024633	phosphatidylinositol-4-phosphate 3-kinase, catalytic subunit type 2 beta	PIK3C2B	0.734121	5.91361	0.000152945	0.00785309	1.66338
ENSBTAG00000008576	pleckstrin homology domain containing, family D (with coiled-coil domains) member 1	PLEKHD1	0.73418	3.43773	1.29116e-05	0.00162151	1.66345
ENSBTAG00000003506	six transmembrane epithelial antigen of the prostate 2	STEAP2	0.741323	3.09186	9.1924e-08	4.17138e-05	1.67171
ENSBTAG00000020839	multiple EGF-like-domains 6	MEGF6	0.744104	1.07652	0.00367014	0.0576745	1.67493
ENSBTAG00000040559	protein tyrosine phosphatase, receptor type, H	PTPRH	0.745768	1.90741	0.00782628	0.0890248	1.67687
ENSBTAG00000012377	enoyl Coenzyme A hydratase domain containing 3	ECHDC3	0.751102	2.62996	0.00139684	0.0316368	1.68308
ENSBTAG00000031232	not annotated		0.754119	1.55867	0.00164841	0.0349113	1.6866
ENSBTAG00000034281	MGAT4 family, member D	MGAT4D	0.759037	-0.0583655	0.0037185	0.0577595	1.69236
ENSBTAG00000014088	muscleblind-like 3 (Drosophila)	MBNL3	0.760287	2.00106	0.00090543	0.0245296	1.69383
ENSBTAG00000019355	potassium channel, subfamily K, member 10	KCNK1	0.767718	0.525324	0.000468386	0.0163948	1.70257
ENSBTAG00000006042	chromosome 10 open reading frame 128	C1 orf128	0.768034	1.67555	5.91816e-06	0.000976573	1.70295
ENSBTAG00000014529	guanylate binding protein 4	GBP4	0.774251	5.54667	0.00109086	0.0272308	1.7103
ENSBTAG00000002605	not annotated		0.780799	0.851177	6.46814e-05	0.00473838	1.71808
ENSBTAG00000015251	asparagine-linked glycosylation 13 homolog (S. cerevisiae)	ALG13	0.781624	1.72447	5.51126e-05	0.00451781	1.71906
ENSBTAG00000010978	prospero homeobox 1	PROX1	0.787732	2.23572	0.000584473	0.01862	1.72636
ENSBTAG00000010852	butyrophilin, subfamily 2, member A2		0.796296	3.58204	0.000647727	0.0200732	1.73664
ENSBTAG00000001213	not annotated		0.79916	1.58323	0.00309386	0.0529793	1.74009
ENSBTAG00000015727	interferon gamma inducible protein 47	IFI47	0.799425	7.00719	0.00217545	0.0415659	1.74041
ENSBTAG00000047570	not annotated		0.802264	4.54594	0.00807079	0.0902707	1.74384
ENSBTAG00000003901	DNA (cytosine-5-)-methyltransferase 3 beta	DNMT3B	0.806414	4.89674	1.57461e-05	0.0018525	1.74886
ENSBTAG00000013569	ecto-NAD+ glycohydrolase; CD38 molecule	CD38	0.809005	5.55753	0.000168773	0.00837668	1.752
ENSBTAG00000011871	B and T lymphocyte associated	BTLA	0.815261	4.6448	0.000439111	0.0157165	1.75962
ENSBTAG00000046649	sphingosine-1-phosphate phosphatase 2	SGPP2	0.818444	0.579379	0.00268607	0.0482302	1.7635
ENSBTAG00000000616	G protein-coupled receptor 161	GPR161	0.818571	0.174236	0.000275918	0.0114569	1.76366
ENSBTAG00000046408	family with sequence similarity 124A	FAM124A	0.831349	0.338219	0.00102716	0.0262594	1.77935
ENSBTAG00000021902	aldehyde dehydrogenase 5 family, member A1	ALDH5A1	0.836278	5.85966	0.000135612	0.00739522	1.78544
ENSBTAG00000042504	small nucleolar RNA SNORD78	SNORD78	0.837491	1.1505	3.5428e-05	0.00330992	1.78694
ENSBTAG00000004770	sodium channel, voltage gated, type IV alpha subunit	SCN4A	0.855351	1.55032	0.00231657	0.043671	1.8092
ENSBTAG00000021626	megalencephalic leukoencephalopathy with subcortical cysts 1	MLC1	0.887868	1.62728	5.88523e-05	0.00451785	1.85044
ENSBTAG00000020824	keratin 10 (epidermolytic hyperkeratosis; keratosis palmaris et plantaris)	KRT1	0.892358	0.0365504	0.0019726	0.0388587	1.85621
ENSBTAG00000003455	ankyrin repeat domain 6	ANKRD6	0.892735	1.40925	0.000665172	0.0205138	1.85669
ENSBTAG00000006357	cysteine-rich protein 3	CRIP3	0.907202	2.56961	0.00136501	0.0311161	1.87541
ENSBTAG00000025161	1-acylglycerol-3-phosphate O-acyltransferase 2 (lysophosphatidic acid acyltransferase, beta)	AGPAT2	0.917756	2.99343	0.00102447	0.0262594	1.88917
ENSBTAG00000019947	synaptotagmin VII	SYT7	0.921131	2.32739	0.00575001	0.0728411	1.8936
ENSBTAG00000000945	ATPase, Ca++ transporting, type 2C, member 2	ATP2C2	0.935977	1.11697	0.00934905	0.0986619	1.91319
ENSBTAG00000045806	free fatty acid receptor 1	FFAR1	0.93951	1.75807	0.00112626	0.027626	1.91788
ENSBTAG00000004014	fibulin 2	FBLN2	0.940803	0.895185	0.000240724	0.0106573	1.9196
ENSBTAG00000009797	RIMS binding protein 2	RIMBP2	0.950865	0.736123	0.00244128	0.0451512	1.93303
ENSBTAG00000046452	not annotated		0.95117	2.0303	2.71457e-05	0.00268768	1.93344
ENSBTAG00000020203	transmembrane protein 151A	TMEM151A	0.965004	1.10327	0.00122944	0.0290026	1.95207
ENSBTAG00000012222	fatty acid 2-hydroxylase	FA2H	0.96715	-0.569508	0.00466776	0.0652459	1.95497
ENSBTAG00000018164	fibronectin type III domain containing 4	FNDC4	0.968398	0.382028	0.00174056	0.0360188	1.95667
ENSBTAG00000007917	teashirt zinc finger homeobox 2	TSHZ2	0.975527	-0.21935	0.00529827	0.0701249	1.96636
ENSBTAG00000020713	BTB and CNC homology 1, basic leucine zipper transcription factor 2	BACH2	0.976432	4.7955	2.12311e-09	1.729e-06	1.96759
ENSBTAG00000021964	cadherin 17, LI cadherin (liver-intestine)	CDH17	0.977901	1.52795	0.00223413	0.0423079	1.9696
ENSBTAG00000039341	not annotated		0.983595	1.46386	8.05736e-05	0.00540811	1.97739
ENSBTAG00000021798	erbB-2	ERBB2	0.997314	6.18252	5.75373e-05	0.00451785	1.99628
ENSBTAG00000016761	NADPH oxidase 1	NOX1	1.01002	0.217462	0.00184667	0.0372442	2.01394
ENSBTAG00000017366	growth factor receptor-bound protein 7	GRB7	1.01431	3.50276	7.10838e-05	0.00504554	2.01994
ENSBTAG00000003200	similar to mCG118705		1.01498	1.65413	4.04576e-06	0.000745006	2.02087
ENSBTAG00000032132	elongation factor RNA polymerase II-like 3; elongation factor RNA polymerase II-like 3	ELL3	1.02606	3.86313	2.36678e-05	0.00251641	2.03645
ENSBTAG00000009852	neuron navigator 3	NAV3	1.02927	4.93584	4.78235e-07	0.000164228	2.041
ENSBTAG00000014541	platelet-derived growth factor alpha polypeptide	PDGFA	1.03644	1.32928	1.39121e-06	0.000327347	2.05116
ENSBTAG00000022158	troponin T type 3 (skeletal, fast)	TNNT3	1.04561	1.44887	0.00150747	0.0333882	2.06423
ENSBTAG00000008943	zinc finger and SCAN domain containing 12	ZSCAN12	1.09872	1.23456	0.000422525	0.015427	2.14164
ENSBTAG00000016867	hydroxysteroid (17-beta) dehydrogenase 3	HSD17B3	1.12947	-0.285131	0.00538281	0.0705093	2.18778
ENSBTAG00000013078	dynein heavy chain Bv1	DNAH11	1.13414	2.00374	0.000628728	0.0195799	2.19488
ENSBTAG00000010532	potassium channel tetramerisation domain containing 11	KCTD11	1.13471	3.92127	1.64985e-09	1.61254e-06	2.19574
ENSBTAG00000001580	calmegin	CLGN	1.14259	3.68152	5.64937e-06	0.000944486	2.20777
ENSBTAG00000008158	coiled-coil domain containing 68	CCDC68	1.15137	0.0058339	0.00201504	0.0393893	2.22124
ENSBTAG00000012111	PR domain containing 5	PRDM5	1.15964	-0.493063	0.00176839	0.0363579	2.23402
ENSBTAG00000008940	neuronal pentraxin I	NPTX1	1.18593	-0.639262	0.00623625	0.0770046	2.2751
ENSBTAG00000005017	zinc finger protein 169	ZNF169	1.18986	0.578328	4.91958e-06	0.000856277	2.2813
ENSBTAG00000014953	not annotated		1.19306	5.82865	0.000148158	0.00777893	2.28638
ENSBTAG00000021777	double C2-like domain-containing protein gamma	DOC2G	1.20512	3.10528	1.11272e-06	0.00027722	2.30556
ENSBTAG00000033642	not annotated		1.21559	2.12114	0.0017751	0.0363739	2.32235
ENSBTAG00000005556	Cytoglobin	CYGB	1.26231	2.67394	7.30694e-06	0.00113222	2.39879
ENSBTAG00000003763	myosin VC	MYO5C	1.27698	3.89408	3.61275e-05	0.00332634	2.42331
ENSBTAG00000016739	RAS protein activator like 1 (GAP1 like); similar to RasGAP-activating-like protein 1	RASAL1	1.287	1.83349	0.000353924	0.0138795	2.44019
ENSBTAG00000045674	interferon beta-1 precursor	IFNB1	1.29535	1.21248	4.97273e-05	0.00426915	2.45436
ENSBTAG00000002835	SMAD family member 1	SMAD1	1.30479	-0.395868	0.00164406	0.0349113	2.47048
ENSBTAG00000017063	erythrocyte membrane protein band 4.1 like 4B	EPB41L4B	1.30588	0.441123	1.35342e-06	0.000327347	2.47234
ENSBTAG00000015197	kelch domain containing 8A	KLHDC8A	1.34687	2.03591	0.000142856	0.00762659	2.5436
ENSBTAG00000018181	coiled-coil domain containing 8	CCDC8	1.37901	-0.0953864	0.000168656	0.00837668	2.6009
ENSBTAG00000015539	Rap guanine nucleotide exchange factor (GEF) 5	RAPGEF5	1.41799	0.645322	7.43353e-06	0.00113796	2.67212
ENSBTAG00000004982	glycosylphosphatidylinositol specific phospholipase D1	GPLD1	1.42109	1.699	0.00396881	0.0597484	2.67788
ENSBTAG00000015565	similar to MHC class II antigen	DSB	1.42406	1.74677	8.77502e-07	0.000242381	2.68339
ENSBTAG00000046793	not annotated		1.43229	-0.753063	0.000124913	0.00711725	2.69875
ENSBTAG00000001739	cadherin 20, type 2	CDH2	1.44963	2.07155	2.03192e-09	1.729e-06	2.73137
ENSBTAG00000020116	MHC Class I JSP.1	JSP.1	1.48879	10.0668	6.27287e-09	3.79539e-06	2.80654
ENSBTAG00000022715	deleted in malignant brain tumors 1	DMBT1	1.51665	2.7786	0.00400872	0.0601355	2.86125
ENSBTAG00000047473	not annotated		1.55355	1.14293	0.00139271	0.0315995	2.93539
ENSBTAG00000003152	interferon, alpha-inducible protein 27	IFI27	1.56633	3.90574	0.00168803	0.0354514	2.9615
ENSBTAG00000002850	HEAT repeat containing 9	HEATR9	1.61168	-0.329799	0.000101042	0.0062322	3.05606
ENSBTAG00000004488	meiosis inhibitor 1	MEI1	1.61953	1.2958	0.000228608	0.0103994	3.07274
ENSBTAG00000020285	proteoglycan 3	PRG3	1.66076	-0.180179	0.00332481	0.0558113	3.16183
ENSBTAG00000006035	protein phosphatase 1, regulatory (inhibitor) subunit 1B	PPP1R1B	1.69661	5.6829	3.61142e-05	0.00332634	3.24139
ENSBTAG00000045635	not annotated		1.72578	-0.756699	0.00106432	0.0267973	3.30759
ENSBTAG00000012023	glutathione peroxidase 6	GPX6	1.73948	-0.42843	5.89104e-05	0.00451785	3.33914
ENSBTAG00000039041	not annotated		1.74908	4.96877	5.64264e-11	1.43391e-07	3.36144
ENSBTAG00000000603	junctional adhesion molecule 2	JAM2	1.82878	0.372801	0.000936735	0.0249521	3.55236
ENSBTAG00000004653	adhesion G protein-coupled receptor A3	GPR125	2.00795	1.81693	1.00524e-09	1.18343e-06	4.02211
ENSBTAG00000009836	chromogranin A (parathyroid secretory protein 1)	CHGA	2.0268	0.0909077	1.92305e-12	8.14475e-09	4.07501
ENSBTAG00000004948	family with sequence similarity 84, member A	FAM84A	2.47433	2.79095	0.000278706	0.011535	5.5571
ENSBTAG00000025642	ryanodine receptor 3	RYR3	2.54006	3.17347	1.11757e-05	0.00149472	5.81612
ENSBTAG00000006349	exostoses (multiple)-like 1	EXTL1	2.60483	0.790176	1.70625e-10	3.09709e-07	6.08319
ENSBTAG00000018432	solute carrier family 6 (neutral amino acid transporter), member 15	SLC6A15	2.99215	0.285298	4.23998e-06	0.000769617	7.9566
ENSBTAG00000038652	similar to LOC510193 protein; similar to Apolipoprotein L, 3		3.6572	5.10572	1.08718e-05	0.00146954	12.6161
