# Supplementary material for: Characterisation of the Whole Blood mRNA Transcriptome in Holstein-Friesian and Jersey Calves in Response to Gradual Weaning
Source: PLoS One. 2016 Aug 1;11(8):e0159707. doi: 10.1371/journal.pone.0159707 (PMC4968839; doi:10.1371/journal.pone.0159707)
Supplement: S4 Table — (XLSX) [file pone.0159707.s004.xlsx]

## Sheet: Supplementary Table 5.4
S4 Table. The molecular functions, biological processes and cellular components which were over-represented among the DEG between Holstein-Friesian and Jersey calves, at each time-point relative to weaning, using the GoSeq analysis
Day -14
Molecular Function		Biological Process		Cellular Component
GO ID	Term	GO ID	Term	GO ID	Term
GO:0004522	pancreatic ribonuclease activity	GO:0030335	positive regulation of cell migration	GO:0005576	extracellular region
GO:0016892	endoribonuclease activity, producing 3'-phosphomonoesters	GO:2000147	positive regulation of cell motility	GO:0005615	extracellular space
GO:0008009	chemokine activity	GO:0033002	muscle cell proliferation	GO:0044421	extracellular region part
GO:0016894	endonuclease activity, active with either ribo- or deoxyribonucleic acids and producing 3'-phosphomonoesters	GO:0051272	positive regulation of cellular component movement	GO:0032994	protein-lipid complex
GO:0042379	chemokine receptor binding	GO:0040017	positive regulation of locomotion	GO:0034358	plasma lipoprotein particle
GO:0005125	cytokine activity			GO:0071437	invadopodium
Day 1
Molecular Function		Biological Process		Cellular Component
GO ID	Term	GO ID	Term	GO ID	Term
GO:0005220	inositol 1,4,5-trisphosphate-sensitive calcium-release channel activity	GO:0060605	tube lumen cavitation	GO:0005615	extracellular space
GO:0005218	intracellular ligand-gated calcium channel activity	GO:0060662	salivary gland cavitation	GO:0042627	chylomicron
GO:0005217	intracellular ligand-gated ion channel activity	GO:0034370	triglyceride-rich lipoprotein particle remodeling	GO:0044421	extracellular region part
GO:0015278	calcium-release channel activity	GO:0034372	very-low-density lipoprotein particle remodeling	GO:0005576	extracellular region
GO:0008201	heparin binding	GO:0006935	chemotaxis	GO:0032994	protein-lipid complex
GO:0004465	lipoprotein lipase activity	GO:0042330	taxis	GO:0034358	plasma lipoprotein particle
GO:1901681	sulfur compound binding	GO:0090136	epithelial cell-cell adhesion	GO:0030054	cell junction
GO:0008009	chemokine activity	GO:0033002	muscle cell proliferation
GO:0004753	saccharopine dehydrogenase activity	GO:0006278	RNA-dependent DNA replication
GO:0047130	saccharopine dehydrogenase (NADP+, L-lysine-forming) activity	GO:0006928	cellular component movement
GO:0047131	saccharopine dehydrogenase (NAD+, L-glutamate-forming) activity	GO:0040011	locomotion
GO:0005539	glycosaminoglycan binding
GO:0042379	chemokine receptor binding
GO:0097367	carbohydrate derivative binding
GO:0001664	G-protein coupled receptor binding
GO:0005125	cytokine activity
GO:0003721	telomeric template RNA reverse transcriptase activity
GO:0004666	prostaglandin-endoperoxide synthase activity
GO:0005298	proline:sodium symporter activity
GO:0005102	receptor binding
Day 8
Molecular Function		Biological Process		Cellular Component
GO ID	Term	GO ID	Term	GO ID	Term
GO:0008201	heparin binding	GO:0033002	muscle cell proliferation	GO:0005576	extracellular region
GO:1901681	sulfur compound binding	GO:0048659	smooth muscle cell proliferation	GO:0005615	extracellular space
GO:0005539	glycosaminoglycan binding	GO:0048660	regulation of smooth muscle cell proliferation	GO:0044421	extracellular region part
GO:0097367	carbohydrate derivative binding	GO:0030335	positive regulation of cell migration	GO:0032994	protein-lipid complex
GO:0005125	cytokine activity	GO:0014812	muscle cell migration	GO:0034358	plasma lipoprotein particle
GO:0004522	pancreatic ribonuclease activity	GO:2000147	positive regulation of cell motility	GO:0031012	extracellular matrix
GO:0016892	endoribonuclease activity, producing 3'-phosphomonoesters	GO:0097006	regulation of plasma lipoprotein particle levels	GO:0071944	cell periphery
GO:0008009	chemokine activity	GO:0051272	positive regulation of cellular component movement	GO:0005886	plasma membrane
GO:0016894	endonuclease activity, active with either ribo- or deoxyribonucleic acids and producing 3'-phosphomonoesters	GO:0040017	positive regulation of locomotion
GO:0042379	chemokine receptor binding	GO:2000026	regulation of multicellular organismal development
GO:0005102	receptor binding	GO:0050793	regulation of developmental process
GO:0001664	G-protein coupled receptor binding	GO:0006928	cellular component movement
GO:0005126	cytokine receptor binding	GO:0019915	lipid storage
		GO:0048646	anatomical structure formation involved in morphogenesis
		GO:0071396	cellular response to lipid
		GO:0006935	chemotaxis
		GO:0042330	taxis
		GO:0009611	response to wounding
		GO:0000165	MAPK cascade
		GO:0051094	positive regulation of developmental process
		GO:0010878	cholesterol storage
		GO:0010885	regulation of cholesterol storage
		GO:0035821	modification of morphology or physiology of other organism
		GO:0071407	cellular response to organic cyclic compound
		GO:0032879	regulation of localization
		GO:0014910	regulation of smooth muscle cell migration
		GO:0001525	angiogenesis
		GO:0045862	positive regulation of proteolysis
		GO:0030168	platelet activation
		GO:0071346	cellular response to interferon-gamma
		GO:0048662	negative regulation of smooth muscle cell proliferation
		GO:0031327	negative regulation of cellular biosynthetic process
		GO:1901342	regulation of vasculature development
		GO:0033993	response to lipid
		GO:0002548	monocyte chemotaxis
		GO:0045595	regulation of cell differentiation
		GO:0043270	positive regulation of ion transport
		GO:0031324	negative regulation of cellular metabolic process
		GO:0045597	positive regulation of cell differentiation
		GO:0034381	plasma lipoprotein particle clearance
		GO:0008285	negative regulation of cell proliferation
