# Supplementary material for: Characterisation of the Whole Blood mRNA Transcriptome in Holstein-Friesian and Jersey Calves in Response to Gradual Weaning
Source: PLoS One. 2016 Aug 1;11(8):e0159707. doi: 10.1371/journal.pone.0159707 (PMC4968839; doi:10.1371/journal.pone.0159707)
Supplement: S5 Table — Enriched functional annotation clusters (group enrichment score > 1.3) are highlighted in yellow. Functional annotations within the clusters which had a benjamini hochberg false discovery rate < 0.1 are highlighted in blue. (XLSX) [file pone.0159707.s005.xlsx]

## Sheet: Supplementary Table 5.5
Annotation Cluster 1; Enrichment Score: 7.0
Category	Term	Count	%	PValue	Genes	List Total	Pop Hits	Pop Total	Fold Enrichment	Bonferroni	Benjamini	FDR
UP_SEQ_FEATURE	signal peptide	41	7.97665	2.65339e-10	ENSBTAG00000013861, ENSBTAG00000006138, ENSBTAG00000002052, ENSBTAG00000002770, ENSBTAG00000017220, ENSBTAG00000001793, ENSBTAG00000021565, ENSBTAG00000031998, ENSBTAG00000004950, ENSBTAG00000007421, ENSBTAG00000000898, ENSBTAG00000034498, ENSBTAG00000003155, ENSBTAG00000025250, ENSBTAG00000008792, ENSBTAG00000002096, ENSBTAG00000003826, ENSBTAG00000002069, ENSBTAG00000001580, ENSBTAG00000020116,…	131	436	4012	2.87996	1.07462e-07	1.07462e-07	3.70765e-07
UP_SEQ_FEATURE	disulfide bond	36	7.00389	4.02355e-10	ENSBTAG00000006138, ENSBTAG00000004547, ENSBTAG00000002770, ENSBTAG00000039292, ENSBTAG00000000616, ENSBTAG00000017220, ENSBTAG00000021565, ENSBTAG00000031998, ENSBTAG00000004950, ENSBTAG00000020990, ENSBTAG00000000898, ENSBTAG00000002885, ENSBTAG00000007642, ENSBTAG00000034498, ENSBTAG00000008792, ENSBTAG00000025250, ENSBTAG00000002096, ENSBTAG00000003826, ENSBTAG00000018137, ENSBTAG00000001580,…	131	348	4012	3.1682	1.62954e-07	8.14769e-08	5.62221e-07
SP_PIR_KEYWORDS	glycoprotein	48	9.33852	2.12414e-09	ENSBTAG00000013861, ENSBTAG00000006138, ENSBTAG00000004547, ENSBTAG00000014861, ENSBTAG00000002052, ENSBTAG00000002770, ENSBTAG00000039292, ENSBTAG00000000616, ENSBTAG00000001793, ENSBTAG00000031998, ENSBTAG00000003454, ENSBTAG00000004950, ENSBTAG00000002348, ENSBTAG00000020990, ENSBTAG00000007421, ENSBTAG00000000898, ENSBTAG00000002885, ENSBTAG00000007642, ENSBTAG00000034498, ENSBTAG00000008792,…	182	536	5056	2.48778	5.14041e-07	5.14041e-07	2.74534e-06
UP_SEQ_FEATURE	glycosylation site:N-linked (GlcNAc...)	42	8.17121	3.33975e-09	ENSBTAG00000013861, ENSBTAG00000006138, ENSBTAG00000004547, ENSBTAG00000014861, ENSBTAG00000002052, ENSBTAG00000002770, ENSBTAG00000039292, ENSBTAG00000000616, ENSBTAG00000001793, ENSBTAG00000004950, ENSBTAG00000002348, ENSBTAG00000020990, ENSBTAG00000007421, ENSBTAG00000000898, ENSBTAG00000002885, ENSBTAG00000007642, ENSBTAG00000008792, ENSBTAG00000002096, ENSBTAG00000003826, ENSBTAG00000018137,…	131	494	4012	2.60383	1.3526e-06	4.50866e-07	4.66672e-06
SP_PIR_KEYWORDS	signal	41	7.97665	1.28135e-08	ENSBTAG00000013861, ENSBTAG00000006138, ENSBTAG00000002052, ENSBTAG00000002770, ENSBTAG00000017220, ENSBTAG00000001793, ENSBTAG00000021565, ENSBTAG00000031998, ENSBTAG00000004950, ENSBTAG00000007421, ENSBTAG00000000898, ENSBTAG00000034498, ENSBTAG00000003155, ENSBTAG00000025250, ENSBTAG00000008792, ENSBTAG00000002096, ENSBTAG00000003826, ENSBTAG00000002069, ENSBTAG00000001580, ENSBTAG00000020116,…	182	436	5056	2.61236	3.10087e-06	1.55044e-06	1.65608e-05
SP_PIR_KEYWORDS	disulfide bond	36	7.00389	6.26245e-08	ENSBTAG00000006138, ENSBTAG00000004547, ENSBTAG00000002770, ENSBTAG00000039292, ENSBTAG00000000616, ENSBTAG00000017220, ENSBTAG00000021565, ENSBTAG00000031998, ENSBTAG00000004950, ENSBTAG00000020990, ENSBTAG00000000898, ENSBTAG00000002885, ENSBTAG00000007642, ENSBTAG00000034498, ENSBTAG00000008792, ENSBTAG00000025250, ENSBTAG00000002096, ENSBTAG00000003826, ENSBTAG00000018137, ENSBTAG00000001580,…	182	371	5056	2.69565	1.5155e-05	5.0517e-06	8.09388e-05
GOTERM_CC_FAT	GO:0005576~extracellular region	30	5.83658	5.04175e-06	ENSBTAG00000006138, ENSBTAG00000004547, ENSBTAG00000038652, ENSBTAG00000002770, ENSBTAG00000017220, ENSBTAG00000001793, ENSBTAG00000021565, ENSBTAG00000031998, ENSBTAG00000004950, ENSBTAG00000039524, ENSBTAG00000010082, ENSBTAG00000001049, ENSBTAG00000002885, ENSBTAG00000000793, ENSBTAG00000025250, ENSBTAG00000003806, ENSBTAG00000018137, ENSBTAG00000014707, ENSBTAG00000011961, ENSBTAG00000020178,…	159	292	3834	2.47738	0.000992734	0.000992734	0.00630348
GOTERM_CC_FAT	GO:0005615~extracellular space	16	3.11284	1.51133e-05	ENSBTAG00000018137, ENSBTAG00000006138, ENSBTAG00000011961, ENSBTAG00000017220, ENSBTAG00000007191, ENSBTAG00000031998, ENSBTAG00000021565, ENSBTAG00000012855, ENSBTAG00000014541, ENSBTAG00000004982, ENSBTAG00000001725, ENSBTAG00000002885, ENSBTAG00000019612, ENSBTAG00000025250, ENSBTAG00000003806, ENSBTAG00000003835	159	103	3834	3.74574	0.00297292	0.00148757	0.0188945
SP_PIR_KEYWORDS	Secreted	21	4.0856	1.68113e-05	ENSBTAG00000018137, ENSBTAG00000006138, ENSBTAG00000004547, ENSBTAG00000014707, ENSBTAG00000002770, ENSBTAG00000011961, ENSBTAG00000020178, ENSBTAG00000017220, ENSBTAG00000001793, ENSBTAG00000007191, ENSBTAG00000021565, ENSBTAG00000004950, ENSBTAG00000009836, ENSBTAG00000014541, ENSBTAG00000004982, ENSBTAG00000001725, ENSBTAG00000019612, ENSBTAG00000025250, ENSBTAG00000007450, ENSBTAG00000009012,…	182	195	5056	2.99172	0.0040601	0.000813342	0.0217255
GOTERM_CC_FAT	GO:0044421~extracellular region part	18	3.50195	0.00033563	ENSBTAG00000018137, ENSBTAG00000006138, ENSBTAG00000011961, ENSBTAG00000017220, ENSBTAG00000007191, ENSBTAG00000031998, ENSBTAG00000021565, ENSBTAG00000012855, ENSBTAG00000014541, ENSBTAG00000010082, ENSBTAG00000004982, ENSBTAG00000001725, ENSBTAG00000002885, ENSBTAG00000000793, ENSBTAG00000019612, ENSBTAG00000025250, ENSBTAG00000003806, ENSBTAG00000003835	159	164	3834	2.64657	0.063991	0.0218022	0.418827
Annotation Cluster 2; Enrichment Score: 4.5
Category	Term	Count	%	PValue	Genes	List Total	Pop Hits	Pop Total	Fold Enrichment	Bonferroni	Benjamini	FDR
INTERPRO	IPR013783:Immunoglobulin-like fold	24	4.66926	2.19443e-10	ENSBTAG00000002069, ENSBTAG00000016208, ENSBTAG00000006138, ENSBTAG00000024947, ENSBTAG00000000603, ENSBTAG00000020116, ENSBTAG00000004869, ENSBTAG00000007275, ENSBTAG00000038288, ENSBTAG00000008816, ENSBTAG00000005891, ENSBTAG00000019386, ENSBTAG00000012208, ENSBTAG00000003920, ENSBTAG00000039520, ENSBTAG00000015565, ENSBTAG00000038263, ENSBTAG00000007642, ENSBTAG00000004043, ENSBTAG00000019497,…	232	131	6326	4.99553	1.02919e-07	1.02919e-07	3.13162e-07
INTERPRO	IPR007110:Immunoglobulin-like	16	3.11284	1.44391e-05	ENSBTAG00000002069, ENSBTAG00000006138, ENSBTAG00000024947, ENSBTAG00000020116, ENSBTAG00000000603, ENSBTAG00000004869, ENSBTAG00000007275, ENSBTAG00000005891, ENSBTAG00000019386, ENSBTAG00000012208, ENSBTAG00000039520, ENSBTAG00000015565, ENSBTAG00000038263, ENSBTAG00000004043, ENSBTAG00000006343, ENSBTAG00000002096	232	114	6326	3.82698	0.00674912	0.00225479	0.0206038
INTERPRO	IPR003599:Immunoglobulin subtype	13	2.52918	1.64968e-05	ENSBTAG00000006138, ENSBTAG00000024947, ENSBTAG00000000603, ENSBTAG00000004869, ENSBTAG00000007275, ENSBTAG00000038288, ENSBTAG00000005891, ENSBTAG00000039520, ENSBTAG00000004043, ENSBTAG00000019497, ENSBTAG00000006343, ENSBTAG00000002096, ENSBTAG00000039932	232	76	6326	4.66413	0.00770719	0.00154621	0.0235396
SMART	SM00409:IG	13	2.52918	4.03282e-05	ENSBTAG00000006138, ENSBTAG00000024947, ENSBTAG00000000603, ENSBTAG00000004869, ENSBTAG00000007275, ENSBTAG00000038288, ENSBTAG00000005891, ENSBTAG00000039520, ENSBTAG00000004043, ENSBTAG00000019497, ENSBTAG00000006343, ENSBTAG00000002096, ENSBTAG00000039932	120	76	2924	4.16798	0.00362303	0.00181316	0.0438632
INTERPRO	IPR013151:Immunoglobulin	7	1.36187	0.00341907	ENSBTAG00000000603, ENSBTAG00000038288, ENSBTAG00000004043, ENSBTAG00000005891, ENSBTAG00000006343, ENSBTAG00000002096, ENSBTAG00000003826	232	41	6326	4.65538	0.799369	0.148392	4.77011
INTERPRO	IPR013106:Immunoglobulin V-set	4	0.77821	0.206446	ENSBTAG00000039520, ENSBTAG00000000603, ENSBTAG00000004869, ENSBTAG00000007275	232	43	6326	2.53649	1	0.998304	96.3113
Annotation Cluster 3; Enrichment Score: 3.8
Category	Term	Count	%	PValue	Genes	List Total	Pop Hits	Pop Total	Fold Enrichment	Bonferroni	Benjamini	FDR
UP_SEQ_FEATURE	disulfide bond	36	7.00389	4.02355e-10	ENSBTAG00000006138, ENSBTAG00000004547, ENSBTAG00000002770, ENSBTAG00000039292, ENSBTAG00000000616, ENSBTAG00000017220, ENSBTAG00000021565, ENSBTAG00000031998, ENSBTAG00000004950, ENSBTAG00000020990, ENSBTAG00000000898, ENSBTAG00000002885, ENSBTAG00000007642, ENSBTAG00000034498, ENSBTAG00000008792, ENSBTAG00000025250, ENSBTAG00000002096, ENSBTAG00000003826, ENSBTAG00000018137, ENSBTAG00000001580,…	131	348	4012	3.1682	1.62954e-07	8.14769e-08	5.62221e-07
SP_PIR_KEYWORDS	glycoprotein	48	9.33852	2.12414e-09	ENSBTAG00000013861, ENSBTAG00000006138, ENSBTAG00000004547, ENSBTAG00000014861, ENSBTAG00000002052, ENSBTAG00000002770, ENSBTAG00000039292, ENSBTAG00000000616, ENSBTAG00000001793, ENSBTAG00000031998, ENSBTAG00000003454, ENSBTAG00000004950, ENSBTAG00000002348, ENSBTAG00000020990, ENSBTAG00000007421, ENSBTAG00000000898, ENSBTAG00000002885, ENSBTAG00000007642, ENSBTAG00000034498, ENSBTAG00000008792,…	182	536	5056	2.48778	5.14041e-07	5.14041e-07	2.74534e-06
UP_SEQ_FEATURE	glycosylation site:N-linked (GlcNAc...)	42	8.17121	3.33975e-09	ENSBTAG00000013861, ENSBTAG00000006138, ENSBTAG00000004547, ENSBTAG00000014861, ENSBTAG00000002052, ENSBTAG00000002770, ENSBTAG00000039292, ENSBTAG00000000616, ENSBTAG00000001793, ENSBTAG00000004950, ENSBTAG00000002348, ENSBTAG00000020990, ENSBTAG00000007421, ENSBTAG00000000898, ENSBTAG00000002885, ENSBTAG00000007642, ENSBTAG00000008792, ENSBTAG00000002096, ENSBTAG00000003826, ENSBTAG00000018137,…	131	494	4012	2.60383	1.3526e-06	4.50866e-07	4.66672e-06
SP_PIR_KEYWORDS	disulfide bond	36	7.00389	6.26245e-08	ENSBTAG00000006138, ENSBTAG00000004547, ENSBTAG00000002770, ENSBTAG00000039292, ENSBTAG00000000616, ENSBTAG00000017220, ENSBTAG00000021565, ENSBTAG00000031998, ENSBTAG00000004950, ENSBTAG00000020990, ENSBTAG00000000898, ENSBTAG00000002885, ENSBTAG00000007642, ENSBTAG00000034498, ENSBTAG00000008792, ENSBTAG00000025250, ENSBTAG00000002096, ENSBTAG00000003826, ENSBTAG00000018137, ENSBTAG00000001580,…	182	371	5056	2.69565	1.5155e-05	5.0517e-06	8.09388e-05
SP_PIR_KEYWORDS	receptor	29	5.64202	1.19653e-07	ENSBTAG00000004547, ENSBTAG00000014861, ENSBTAG00000007275, ENSBTAG00000039292, ENSBTAG00000012029, ENSBTAG00000014983, ENSBTAG00000000616, ENSBTAG00000039520, ENSBTAG00000020990, ENSBTAG00000000898, ENSBTAG00000002885, ENSBTAG00000007642, ENSBTAG00000004043, ENSBTAG00000033669, ENSBTAG00000015311, ENSBTAG00000011761, ENSBTAG00000002096, ENSBTAG00000027684, ENSBTAG00000004869, ENSBTAG00000010238,…	182	262	5056	3.07491	2.89557e-05	7.239e-06	0.000154646
UP_SEQ_FEATURE	topological domain:Extracellular	23	4.47471	7.47692e-05	ENSBTAG00000013861, ENSBTAG00000004547, ENSBTAG00000014861, ENSBTAG00000004869, ENSBTAG00000010238, ENSBTAG00000039292, ENSBTAG00000008294, ENSBTAG00000000616, ENSBTAG00000031998, ENSBTAG00000002348, ENSBTAG00000020990, ENSBTAG00000008483, ENSBTAG00000007421, ENSBTAG00000030424, ENSBTAG00000000898, ENSBTAG00000013755, ENSBTAG00000007642, ENSBTAG00000002885, ENSBTAG00000007650, ENSBTAG00000018432,…	131	281	4012	2.50675	0.0298287	0.00754208	0.104426
KEGG_PATHWAY	bta04080:Neuroactive ligand-receptor interaction	11	2.14008	0.00041425	ENSBTAG00000021565, ENSBTAG00000020990, ENSBTAG00000007169, ENSBTAG00000008483, ENSBTAG00000000898, ENSBTAG00000010238, ENSBTAG00000039292, ENSBTAG00000021958, ENSBTAG00000019741, ENSBTAG00000017220, ENSBTAG00000007996	126	67	2949	3.84257	0.0441579	0.0223282	0.466248
GOTERM_CC_FAT	GO:0005886~plasma membrane	44	8.56031	0.000454568	ENSBTAG00000013861, ENSBTAG00000004547, ENSBTAG00000014861, ENSBTAG00000013525, ENSBTAG00000039292, ENSBTAG00000000616, ENSBTAG00000010244, ENSBTAG00000017220, ENSBTAG00000003920, ENSBTAG00000013953, ENSBTAG00000015565, ENSBTAG00000002348, ENSBTAG00000039682, ENSBTAG00000020990, ENSBTAG00000007421, ENSBTAG00000000898, ENSBTAG00000017574, ENSBTAG00000007642, ENSBTAG00000034498, ENSBTAG00000007994,…	159	640	3834	1.65778	0.0856759	0.0221437	0.56686
SP_PIR_KEYWORDS	cell membrane	21	4.0856	0.000659674	ENSBTAG00000013861, ENSBTAG00000004547, ENSBTAG00000014861, ENSBTAG00000004869, ENSBTAG00000010238, ENSBTAG00000039292, ENSBTAG00000000616, ENSBTAG00000009873, ENSBTAG00000002348, ENSBTAG00000039682, ENSBTAG00000012855, ENSBTAG00000020990, ENSBTAG00000008483, ENSBTAG00000007421, ENSBTAG00000013290, ENSBTAG00000000898, ENSBTAG00000034498, ENSBTAG00000007642, ENSBTAG00000007994, ENSBTAG00000000512,…	182	254	5056	2.29679	0.147595	0.0262646	0.849249
SP_PIR_KEYWORDS	g-protein coupled receptor	10	1.94553	0.00117329	ENSBTAG00000020990, ENSBTAG00000008483, ENSBTAG00000013791, ENSBTAG00000000898, ENSBTAG00000010238, ENSBTAG00000007642, ENSBTAG00000039292, ENSBTAG00000040128, ENSBTAG00000019741, ENSBTAG00000000616	182	74	5056	3.75408	0.24731	0.0348896	1.50585
GOTERM_BP_FAT	GO:0007166~cell surface receptor linked signal transduction	26	5.05837	0.00119344	ENSBTAG00000039292, ENSBTAG00000000616, ENSBTAG00000020990, ENSBTAG00000000898, ENSBTAG00000007642, ENSBTAG00000011761, ENSBTAG00000007996, ENSBTAG00000010238, ENSBTAG00000021609, ENSBTAG00000019741, ENSBTAG00000014497, ENSBTAG00000004885, ENSBTAG00000004076, ENSBTAG00000014541, ENSBTAG00000008483, ENSBTAG00000002835, ENSBTAG00000013791, ENSBTAG00000004322, ENSBTAG00000013755, ENSBTAG00000003528,…	198	332	4989	1.97326	0.768973	0.386397	1.91727
GOTERM_CC_FAT	GO:0031224~intrinsic to membrane	75	14.5914	0.00120933	ENSBTAG00000007111, ENSBTAG00000011936, ENSBTAG00000008294, ENSBTAG00000010244, ENSBTAG00000000616, ENSBTAG00000003920, ENSBTAG00000002348, ENSBTAG00000016429, ENSBTAG00000011882, ENSBTAG00000031265, ENSBTAG00000007642, ENSBTAG00000003155, ENSBTAG00000003826, ENSBTAG00000010238, ENSBTAG00000001154, ENSBTAG00000019386, ENSBTAG00000019741, ENSBTAG00000010532, ENSBTAG00000001151, ENSBTAG00000014497,…	159	1344	3834	1.3456	0.212098	0.0465577	1.50154
GOTERM_BP_FAT	GO:0007186~G-protein coupled receptor protein signaling pathway	15	2.91829	0.00121884	ENSBTAG00000010238, ENSBTAG00000021609, ENSBTAG00000039292, ENSBTAG00000019741, ENSBTAG00000000616, ENSBTAG00000014497, ENSBTAG00000004076, ENSBTAG00000020990, ENSBTAG00000008483, ENSBTAG00000013791, ENSBTAG00000000898, ENSBTAG00000007642, ENSBTAG00000003528, ENSBTAG00000040128, ENSBTAG00000007996	198	141	4989	2.68053	0.77607	0.312096	1.9577
UP_SEQ_FEATURE	topological domain:Cytoplasmic	26	5.05837	0.00398437	ENSBTAG00000013861, ENSBTAG00000004547, ENSBTAG00000014861, ENSBTAG00000039292, ENSBTAG00000000616, ENSBTAG00000008294, ENSBTAG00000031998, ENSBTAG00000002348, ENSBTAG00000020990, ENSBTAG00000007421, ENSBTAG00000000898, ENSBTAG00000002885, ENSBTAG00000007642, ENSBTAG00000002096, ENSBTAG00000003826, ENSBTAG00000001580, ENSBTAG00000004869, ENSBTAG00000012387, ENSBTAG00000010238, ENSBTAG00000008483,…	131	447	4012	1.78138	0.801485	0.236225	5.42584
SP_PIR_KEYWORDS	transducer	10	1.94553	0.00655478	ENSBTAG00000020990, ENSBTAG00000008483, ENSBTAG00000013791, ENSBTAG00000000898, ENSBTAG00000010238, ENSBTAG00000007642, ENSBTAG00000039292, ENSBTAG00000040128, ENSBTAG00000019741, ENSBTAG00000000616	182	95	5056	2.92423	0.796376	0.0946805	8.14839
GOTERM_CC_FAT	GO:0016021~integral to membrane	69	13.4241	0.00725721	ENSBTAG00000007111, ENSBTAG00000011936, ENSBTAG00000008294, ENSBTAG00000010244, ENSBTAG00000000616, ENSBTAG00000002348, ENSBTAG00000016429, ENSBTAG00000011882, ENSBTAG00000031265, ENSBTAG00000007642, ENSBTAG00000003155, ENSBTAG00000003826, ENSBTAG00000010238, ENSBTAG00000001154, ENSBTAG00000019386, ENSBTAG00000019741, ENSBTAG00000010532, ENSBTAG00000001151, ENSBTAG00000014497, ENSBTAG00000039555,…	159	1288	3834	1.29178	0.761857	0.212701	8.70437
SP_PIR_KEYWORDS	transmembrane	51	9.92218	0.00875518	ENSBTAG00000000616, ENSBTAG00000010244, ENSBTAG00000008294, ENSBTAG00000002348, ENSBTAG00000016429, ENSBTAG00000031265, ENSBTAG00000007642, ENSBTAG00000003155, ENSBTAG00000003826, ENSBTAG00000010238, ENSBTAG00000001154, ENSBTAG00000019386, ENSBTAG00000000095, ENSBTAG00000019741, ENSBTAG00000039555, ENSBTAG00000013791, ENSBTAG00000013755, ENSBTAG00000002786, ENSBTAG00000026283, ENSBTAG00000007650,…	182	1020	5056	1.38901	0.880935	0.117663	10.7434
INTERPRO	IPR000276:7TM GPCR, rhodopsin-like	8	1.55642	0.013412	ENSBTAG00000020990, ENSBTAG00000013791, ENSBTAG00000000898, ENSBTAG00000010238, ENSBTAG00000007642, ENSBTAG00000039292, ENSBTAG00000019741, ENSBTAG00000000616	232	70	6326	3.11626	0.998223	0.363863	17.5266
INTERPRO	IPR017452:GPCR, rhodopsin-like superfamily	8	1.55642	0.013412	ENSBTAG00000020990, ENSBTAG00000013791, ENSBTAG00000000898, ENSBTAG00000010238, ENSBTAG00000007642, ENSBTAG00000039292, ENSBTAG00000019741, ENSBTAG00000000616	232	70	6326	3.11626	0.998223	0.363863	17.5266
SP_PIR_KEYWORDS	membrane	61	11.8677	0.0150876	ENSBTAG00000010244, ENSBTAG00000000616, ENSBTAG00000008294, ENSBTAG00000002348, ENSBTAG00000016429, ENSBTAG00000039682, ENSBTAG00000007642, ENSBTAG00000003155, ENSBTAG00000003826, ENSBTAG00000008091, ENSBTAG00000010238, ENSBTAG00000001154, ENSBTAG00000019386, ENSBTAG00000000095, ENSBTAG00000026501, ENSBTAG00000011927, ENSBTAG00000039555, ENSBTAG00000009873, ENSBTAG00000017685, ENSBTAG00000012855,…	182	1305	5056	1.29854	0.974752	0.176039	17.8386
PIR_SUPERFAMILY	PIRSF800006:rhodopsin-like G protein-coupled receptors	7	1.36187	0.0171979	ENSBTAG00000020990, ENSBTAG00000000898, ENSBTAG00000010238, ENSBTAG00000007642, ENSBTAG00000039292, ENSBTAG00000019741, ENSBTAG00000000616	118	48	2661	3.28867	0.889543	0.889543	18.2234
UP_SEQ_FEATURE	transmembrane region	35	6.80934	0.0666448	ENSBTAG00000013861, ENSBTAG00000004547, ENSBTAG00000014861, ENSBTAG00000018808, ENSBTAG00000039292, ENSBTAG00000000616, ENSBTAG00000010244, ENSBTAG00000008294, ENSBTAG00000031998, ENSBTAG00000016429, ENSBTAG00000002348, ENSBTAG00000020990, ENSBTAG00000007421, ENSBTAG00000000898, ENSBTAG00000002885, ENSBTAG00000007642, ENSBTAG00000003155, ENSBTAG00000002096, ENSBTAG00000003826, ENSBTAG00000001580,…	131	821	4012	1.30561	1	0.969547	61.8532
Annotation Cluster 4; Enrichment Score: 3.6
Category	Term	Count	%	PValue	Genes	List Total	Pop Hits	Pop Total	Fold Enrichment	Bonferroni	Benjamini	FDR
INTERPRO	IPR001304:C-type lectin	8	1.55642	8.43524e-06	ENSBTAG00000038843, ENSBTAG00000007720, ENSBTAG00000004547, ENSBTAG00000030424, ENSBTAG00000012815, ENSBTAG00000007312, ENSBTAG00000012029, ENSBTAG00000020285	232	22	6326	9.91536	0.00394833	0.00197612	0.0120371
SMART	SM00034:CLECT	8	1.55642	1.59101e-05	ENSBTAG00000038843, ENSBTAG00000007720, ENSBTAG00000004547, ENSBTAG00000030424, ENSBTAG00000012815, ENSBTAG00000007312, ENSBTAG00000012029, ENSBTAG00000020285	120	22	2924	8.86061	0.00143089	0.00143089	0.0173068
INTERPRO	IPR016186:C-type lectin-like	8	1.55642	1.60793e-05	ENSBTAG00000038843, ENSBTAG00000007720, ENSBTAG00000004547, ENSBTAG00000030424, ENSBTAG00000012815, ENSBTAG00000007312, ENSBTAG00000012029, ENSBTAG00000020285	232	24	6326	9.08908	0.0075129	0.00188354	0.022944
INTERPRO	IPR018378:C-type lectin, conserved site	4	0.77821	0.00827977	ENSBTAG00000004547, ENSBTAG00000030424, ENSBTAG00000007312, ENSBTAG00000020285	232	12	6326	9.08908	0.979745	0.277435	11.1882
SP_PIR_KEYWORDS	Lectin	4	0.77821	0.0641714	ENSBTAG00000004547, ENSBTAG00000030424, ENSBTAG00000007312, ENSBTAG00000020285	182	26	5056	4.27388	1	0.460608	57.5646
Annotation Cluster 5; Enrichment Score: 3.0
Category	Term	Count	%	PValue	Genes	List Total	Pop Hits	Pop Total	Fold Enrichment	Bonferroni	Benjamini	FDR
INTERPRO	IPR013783:Immunoglobulin-like fold	24	4.66926	2.19443e-10	ENSBTAG00000002069, ENSBTAG00000016208, ENSBTAG00000006138, ENSBTAG00000024947, ENSBTAG00000000603, ENSBTAG00000020116, ENSBTAG00000004869, ENSBTAG00000007275, ENSBTAG00000038288, ENSBTAG00000008816, ENSBTAG00000005891, ENSBTAG00000019386, ENSBTAG00000012208, ENSBTAG00000003920, ENSBTAG00000039520, ENSBTAG00000015565, ENSBTAG00000038263, ENSBTAG00000007642, ENSBTAG00000004043, ENSBTAG00000019497,…	232	131	6326	4.99553	1.02919e-07	1.02919e-07	3.13162e-07
INTERPRO	IPR007110:Immunoglobulin-like	16	3.11284	1.44391e-05	ENSBTAG00000002069, ENSBTAG00000006138, ENSBTAG00000024947, ENSBTAG00000020116, ENSBTAG00000000603, ENSBTAG00000004869, ENSBTAG00000007275, ENSBTAG00000005891, ENSBTAG00000019386, ENSBTAG00000012208, ENSBTAG00000039520, ENSBTAG00000015565, ENSBTAG00000038263, ENSBTAG00000004043, ENSBTAG00000006343, ENSBTAG00000002096	232	114	6326	3.82698	0.00674912	0.00225479	0.0206038
INTERPRO	IPR003597:Immunoglobulin C1-set	7	1.36187	0.000219414	ENSBTAG00000039520, ENSBTAG00000002069, ENSBTAG00000015565, ENSBTAG00000038263, ENSBTAG00000020116, ENSBTAG00000019386, ENSBTAG00000012208	232	25	6326	7.63483	0.0977976	0.0170065	0.312665
SMART	SM00407:IGc1	7	1.36187	0.000375717	ENSBTAG00000039520, ENSBTAG00000002069, ENSBTAG00000015565, ENSBTAG00000038263, ENSBTAG00000020116, ENSBTAG00000019386, ENSBTAG00000012208	120	25	2924	6.82267	0.0332553	0.0112103	0.407975
INTERPRO	IPR010579:MHC class I, alpha chain, C-terminal	4	0.77821	0.000885862	ENSBTAG00000002069, ENSBTAG00000020116, ENSBTAG00000019386, ENSBTAG00000012208	232	6	6326	18.1782	0.340091	0.0576505	1.25679
INTERPRO	IPR003006:Immunoglobulin/major histocompatibility complex, conserved site	6	1.16732	0.00121976	ENSBTAG00000039520, ENSBTAG00000002069, ENSBTAG00000015565, ENSBTAG00000020116, ENSBTAG00000019386, ENSBTAG00000012208	232	23	6326	7.11319	0.43584	0.0690522	1.72667
SP_PIR_KEYWORDS	mhc i	4	0.77821	0.00142008	ENSBTAG00000002069, ENSBTAG00000020116, ENSBTAG00000019386, ENSBTAG00000012208	182	7	5056	15.8744	0.291003	0.0374907	1.81992
INTERPRO	IPR011161:MHC class I-like antigen recognition	5	0.972763	0.00222916	ENSBTAG00000002069, ENSBTAG00000038263, ENSBTAG00000020116, ENSBTAG00000019386, ENSBTAG00000012208	232	16	6326	8.52101	0.648885	0.109786	3.13455
GOTERM_BP_FAT	GO:0002474~antigen processing and presentation of peptide antigen via MHC class I	4	0.77821	0.00791134	ENSBTAG00000002069, ENSBTAG00000020116, ENSBTAG00000019386, ENSBTAG00000012208	198	11	4989	9.16253	0.999941	0.62265	12.0819
INTERPRO	IPR001039:MHC class I, alpha chain, alpha1 and alpha2	4	0.77821	0.0104773	ENSBTAG00000002069, ENSBTAG00000020116, ENSBTAG00000019386, ENSBTAG00000012208	232	13	6326	8.38992	0.992844	0.316126	13.9557
GOTERM_CC_FAT	GO:0042611~MHC protein complex	5	0.972763	0.026273	ENSBTAG00000002069, ENSBTAG00000015565, ENSBTAG00000020116, ENSBTAG00000019386, ENSBTAG00000012208	159	28	3834	4.30593	0.994726	0.480882	28.3145
GOTERM_BP_FAT	GO:0048002~antigen processing and presentation of peptide antigen	4	0.77821	0.0273955	ENSBTAG00000002069, ENSBTAG00000020116, ENSBTAG00000019386, ENSBTAG00000012208	198	17	4989	5.9287	1	0.881187	36.2574
GOTERM_BP_FAT	GO:0019882~antigen processing and presentation	6	1.16732	0.0336662	ENSBTAG00000002069, ENSBTAG00000015565, ENSBTAG00000038263, ENSBTAG00000020116, ENSBTAG00000019386, ENSBTAG00000012208	198	46	4989	3.28656	1	0.890471	42.6029
GOTERM_CC_FAT	GO:0042612~MHC class I protein complex	4	0.77821	0.0409692	ENSBTAG00000002069, ENSBTAG00000020116, ENSBTAG00000019386, ENSBTAG00000012208	159	19	3834	5.07646	0.999736	0.599747	40.7274
SP_PIR_KEYWORDS	immune response	6	1.16732	0.0487997	ENSBTAG00000002069, ENSBTAG00000004547, ENSBTAG00000020116, ENSBTAG00000019386, ENSBTAG00000007450, ENSBTAG00000012208	182	56	5056	2.97645	0.999994	0.396178	47.6186
Annotation Cluster 6; Enrichment Score: 2.6
Category	Term	Count	%	PValue	Genes	List Total	Pop Hits	Pop Total	Fold Enrichment	Bonferroni	Benjamini	FDR
GOTERM_BP_FAT	GO:0006955~immune response	25	4.86381	2.14938e-07	ENSBTAG00000004547, ENSBTAG00000031725, ENSBTAG00000037527, ENSBTAG00000021830, ENSBTAG00000031998, ENSBTAG00000015565, ENSBTAG00000039861, ENSBTAG00000007642, ENSBTAG00000025250, ENSBTAG00000002069, ENSBTAG00000020116, ENSBTAG00000011563, ENSBTAG00000011961, ENSBTAG00000033748, ENSBTAG00000014628, ENSBTAG00000019386, ENSBTAG00000020285, ENSBTAG00000012208, ENSBTAG00000007191, ENSBTAG00000009836,…	198	187	4989	3.36858	0.000263694	0.000263694	0.000348445
GOTERM_BP_FAT	GO:0006952~defense response	12	2.33463	0.00693851	ENSBTAG00000007191, ENSBTAG00000031998, ENSBTAG00000009836, ENSBTAG00000004547, ENSBTAG00000002835, ENSBTAG00000001725, ENSBTAG00000007642, ENSBTAG00000016061, ENSBTAG00000033748, ENSBTAG00000025250, ENSBTAG00000007450, ENSBTAG00000015727	198	119	4989	2.54087	0.999805	0.612968	10.6738
GOTERM_BP_FAT	GO:0009611~response to wounding	10	1.94553	0.0233843	ENSBTAG00000007191, ENSBTAG00000004547, ENSBTAG00000002835, ENSBTAG00000000898, ENSBTAG00000003196, ENSBTAG00000001725, ENSBTAG00000007642, ENSBTAG00000011961, ENSBTAG00000025250, ENSBTAG00000007450	198	106	4989	2.37707	1	0.874294	31.8593
GOTERM_BP_FAT	GO:0006954~inflammatory response	7	1.36187	0.0368773	ENSBTAG00000007191, ENSBTAG00000004547, ENSBTAG00000002835, ENSBTAG00000001725, ENSBTAG00000007642, ENSBTAG00000025250, ENSBTAG00000007450	198	63	4989	2.79966	1	0.90026	45.6179
SP_PIR_KEYWORDS	inflammatory response	4	0.77821	0.0525938	ENSBTAG00000007191, ENSBTAG00000004547, ENSBTAG00000001725, ENSBTAG00000025250	182	24	5056	4.63004	0.999998	0.407251	50.2557
Annotation Cluster 7; Enrichment Score: 2.5
Category	Term	Count	%	PValue	Genes	List Total	Pop Hits	Pop Total	Fold Enrichment	Bonferroni	Benjamini	FDR
GOTERM_CC_FAT	GO:0005615~extracellular space	16	3.11284	1.51133e-05	ENSBTAG00000018137, ENSBTAG00000006138, ENSBTAG00000011961, ENSBTAG00000017220, ENSBTAG00000007191, ENSBTAG00000031998, ENSBTAG00000021565, ENSBTAG00000012855, ENSBTAG00000014541, ENSBTAG00000004982, ENSBTAG00000001725, ENSBTAG00000002885, ENSBTAG00000019612, ENSBTAG00000025250, ENSBTAG00000003806, ENSBTAG00000003835	159	103	3834	3.74574	0.00297292	0.00148757	0.0188945
GOTERM_MF_FAT	GO:0030246~carbohydrate binding	11	2.14008	0.000334909	ENSBTAG00000004547, ENSBTAG00000012855, ENSBTAG00000030424, ENSBTAG00000011961, ENSBTAG00000002215, ENSBTAG00000019612, ENSBTAG00000021830, ENSBTAG00000007312, ENSBTAG00000009012, ENSBTAG00000007223, ENSBTAG00000003835	196	72	5145	4.01042	0.119224	0.119224	0.462471
GOTERM_MF_FAT	GO:0030247~polysaccharide binding	6	1.16732	0.00649579	ENSBTAG00000012855, ENSBTAG00000011961, ENSBTAG00000019612, ENSBTAG00000021830, ENSBTAG00000009012, ENSBTAG00000003835	196	32	5145	4.92188	0.91541	0.173037	8.62384
GOTERM_MF_FAT	GO:0001871~pattern binding	6	1.16732	0.00649579	ENSBTAG00000012855, ENSBTAG00000011961, ENSBTAG00000019612, ENSBTAG00000021830, ENSBTAG00000009012, ENSBTAG00000003835	196	32	5145	4.92188	0.91541	0.173037	8.62384
GOTERM_MF_FAT	GO:0008201~heparin binding	4	0.77821	0.0332039	ENSBTAG00000012855, ENSBTAG00000011961, ENSBTAG00000019612, ENSBTAG00000003835	196	19	5145	5.52632	0.999997	0.400655	37.3305
GOTERM_MF_FAT	GO:0005539~glycosaminoglycan binding	4	0.77821	0.0805378	ENSBTAG00000012855, ENSBTAG00000011961, ENSBTAG00000019612, ENSBTAG00000003835	196	27	5145	3.88889	1	0.666247	68.7132
S5 Table. Functional annotation clusters identified among the DEG between Holstein-Friesian and Jersey calves at day -14, relative to weaning
Annotation Cluster 8; Enrichment Score: 2.4
Category	Term	Count	%	PValue	Genes	List Total	Pop Hits	Pop Total	Fold Enrichment	Bonferroni	Benjamini	FDR
GOTERM_CC_FAT	GO:0005615~extracellular space	16	3.11284	1.51133e-05	ENSBTAG00000018137, ENSBTAG00000006138, ENSBTAG00000011961, ENSBTAG00000017220, ENSBTAG00000007191, ENSBTAG00000031998, ENSBTAG00000021565, ENSBTAG00000012855, ENSBTAG00000014541, ENSBTAG00000004982, ENSBTAG00000001725, ENSBTAG00000002885, ENSBTAG00000019612, ENSBTAG00000025250, ENSBTAG00000003806, ENSBTAG00000003835	159	103	3834	3.74574	0.00297292	0.00148757	0.0188945
KEGG_PATHWAY	bta04060:Cytokine-cytokine receptor interaction	15	2.91829	0.000151302	ENSBTAG00000031725, ENSBTAG00000011563, ENSBTAG00000011961, ENSBTAG00000026489, ENSBTAG00000033748, ENSBTAG00000014983, ENSBTAG00000007191, ENSBTAG00000031998, ENSBTAG00000019338, ENSBTAG00000001725, ENSBTAG00000003781, ENSBTAG00000007173, ENSBTAG00000025250, ENSBTAG00000006343, ENSBTAG00000006078	126	109	2949	3.22084	0.0163579	0.0163579	0.170524
GOTERM_CC_FAT	GO:0044421~extracellular region part	18	3.50195	0.00033563	ENSBTAG00000018137, ENSBTAG00000006138, ENSBTAG00000011961, ENSBTAG00000017220, ENSBTAG00000007191, ENSBTAG00000031998, ENSBTAG00000021565, ENSBTAG00000012855, ENSBTAG00000014541, ENSBTAG00000010082, ENSBTAG00000004982, ENSBTAG00000001725, ENSBTAG00000002885, ENSBTAG00000000793, ENSBTAG00000019612, ENSBTAG00000025250, ENSBTAG00000003806, ENSBTAG00000003835	159	164	3834	2.64657	0.063991	0.0218022	0.418827
GOTERM_MF_FAT	GO:0008009~chemokine activity	5	0.972763	0.000779574	ENSBTAG00000007191, ENSBTAG00000031998, ENSBTAG00000001725, ENSBTAG00000011961, ENSBTAG00000025250	196	12	5145	10.9375	0.255896	0.0938266	1.07344
GOTERM_MF_FAT	GO:0042379~chemokine receptor binding	5	0.972763	0.000779574	ENSBTAG00000007191, ENSBTAG00000031998, ENSBTAG00000001725, ENSBTAG00000011961, ENSBTAG00000025250	196	12	5145	10.9375	0.255896	0.0938266	1.07344
SP_PIR_KEYWORDS	chemotaxis	5	0.972763	0.00327796	ENSBTAG00000007191, ENSBTAG00000031998, ENSBTAG00000001725, ENSBTAG00000011961, ENSBTAG00000025250	182	18	5056	7.71673	0.548224	0.0592902	4.15476
SP_PIR_KEYWORDS	cytokine	6	1.16732	0.00328209	ENSBTAG00000007191, ENSBTAG00000031998, ENSBTAG00000001725, ENSBTAG00000011961, ENSBTAG00000025250, ENSBTAG00000003835	182	29	5056	5.74763	0.548677	0.0552421	4.1599
GOTERM_BP_FAT	GO:0042330~taxis	7	1.36187	0.00385493	ENSBTAG00000007191, ENSBTAG00000031998, ENSBTAG00000014541, ENSBTAG00000001725, ENSBTAG00000011961, ENSBTAG00000025250, ENSBTAG00000019741	198	39	4989	4.52253	0.991254	0.54609	6.06947
GOTERM_BP_FAT	GO:0006935~chemotaxis	7	1.36187	0.00385493	ENSBTAG00000007191, ENSBTAG00000031998, ENSBTAG00000014541, ENSBTAG00000001725, ENSBTAG00000011961, ENSBTAG00000025250, ENSBTAG00000019741	198	39	4989	4.52253	0.991254	0.54609	6.06947
INTERPRO	IPR001811:Small chemokine, interleukin-8-like	4	0.77821	0.00476727	ENSBTAG00000007191, ENSBTAG00000001725, ENSBTAG00000011961, ENSBTAG00000025250	232	10	6326	10.9069	0.893669	0.18433	6.59221
SMART	SM00199:SCY	4	0.77821	0.00639576	ENSBTAG00000007191, ENSBTAG00000001725, ENSBTAG00000011961, ENSBTAG00000025250	120	10	2924	9.74667	0.438682	0.13443	6.74209
GOTERM_BP_FAT	GO:0006952~defense response	12	2.33463	0.00693851	ENSBTAG00000007191, ENSBTAG00000031998, ENSBTAG00000009836, ENSBTAG00000004547, ENSBTAG00000002835, ENSBTAG00000001725, ENSBTAG00000007642, ENSBTAG00000016061, ENSBTAG00000033748, ENSBTAG00000025250, ENSBTAG00000007450, ENSBTAG00000015727	198	119	4989	2.54087	0.999805	0.612968	10.6738
GOTERM_MF_FAT	GO:0005125~cytokine activity	6	1.16732	0.0095547	ENSBTAG00000007191, ENSBTAG00000031998, ENSBTAG00000001725, ENSBTAG00000011961, ENSBTAG00000025250, ENSBTAG00000003835	196	35	5145	4.5	0.973712	0.215396	12.4411
GOTERM_BP_FAT	GO:0009611~response to wounding	10	1.94553	0.0233843	ENSBTAG00000007191, ENSBTAG00000004547, ENSBTAG00000002835, ENSBTAG00000000898, ENSBTAG00000003196, ENSBTAG00000001725, ENSBTAG00000007642, ENSBTAG00000011961, ENSBTAG00000025250, ENSBTAG00000007450	198	106	4989	2.37707	1	0.874294	31.8593
GOTERM_BP_FAT	GO:0007626~locomotory behavior	7	1.36187	0.039408	ENSBTAG00000007191, ENSBTAG00000031998, ENSBTAG00000014541, ENSBTAG00000001725, ENSBTAG00000011961, ENSBTAG00000025250, ENSBTAG00000019741	198	64	4989	2.75592	1	0.90455	47.8887
GOTERM_BP_FAT	GO:0007610~behavior	8	1.55642	0.0990513	ENSBTAG00000007191, ENSBTAG00000031998, ENSBTAG00000014541, ENSBTAG00000001725, ENSBTAG00000011961, ENSBTAG00000006035, ENSBTAG00000025250, ENSBTAG00000019741	198	100	4989	2.01576	1	0.983894	81.5659
KEGG_PATHWAY	bta04062:Chemokine signaling pathway	6	1.16732	0.559383	ENSBTAG00000007191, ENSBTAG00000031998, ENSBTAG00000002767, ENSBTAG00000001725, ENSBTAG00000011961, ENSBTAG00000025250	126	117	2949	1.20024	1	0.993008	99.9903
Annotation Cluster 9; Enrichment Score: 2.2
Category	Term	Count	%	PValue	Genes	List Total	Pop Hits	Pop Total	Fold Enrichment	Bonferroni	Benjamini	FDR
UP_SEQ_FEATURE	topological domain:Extracellular	23	4.47471	7.47692e-05	ENSBTAG00000013861, ENSBTAG00000004547, ENSBTAG00000014861, ENSBTAG00000004869, ENSBTAG00000010238, ENSBTAG00000039292, ENSBTAG00000008294, ENSBTAG00000000616, ENSBTAG00000031998, ENSBTAG00000002348, ENSBTAG00000020990, ENSBTAG00000008483, ENSBTAG00000007421, ENSBTAG00000030424, ENSBTAG00000000898, ENSBTAG00000013755, ENSBTAG00000007642, ENSBTAG00000002885, ENSBTAG00000007650, ENSBTAG00000018432,…	131	281	4012	2.50675	0.0298287	0.00754208	0.104426
GOTERM_BP_FAT	GO:0030001~metal ion transport	15	2.91829	0.00073536	ENSBTAG00000013861, ENSBTAG00000014861, ENSBTAG00000002770, ENSBTAG00000011873, ENSBTAG00000010532, ENSBTAG00000008294, ENSBTAG00000000945, ENSBTAG00000025642, ENSBTAG00000008626, ENSBTAG00000019355, ENSBTAG00000002348, ENSBTAG00000020523, ENSBTAG00000007650, ENSBTAG00000020031, ENSBTAG00000003826	198	134	4989	2.82056	0.594494	0.363206	1.18548
SP_PIR_KEYWORDS	Sodium	5	0.972763	0.00206208	ENSBTAG00000013861, ENSBTAG00000002348, ENSBTAG00000014861, ENSBTAG00000007650, ENSBTAG00000003826	182	16	5056	8.68132	0.39319	0.0443969	2.63261
GOTERM_MF_FAT	GO:0031420~alkali metal ion binding	7	1.36187	0.00238907	ENSBTAG00000013861, ENSBTAG00000002348, ENSBTAG00000014861, ENSBTAG00000007650, ENSBTAG00000008294, ENSBTAG00000017056, ENSBTAG00000003826	196	37	5145	4.96622	0.596082	0.121471	3.25591
GOTERM_MF_FAT	GO:0031402~sodium ion binding	5	0.972763	0.0032291	ENSBTAG00000013861, ENSBTAG00000002348, ENSBTAG00000014861, ENSBTAG00000007650, ENSBTAG00000003826	196	17	5145	7.72059	0.70648	0.142064	4.37715
SP_PIR_KEYWORDS	Sodium transport	5	0.972763	0.00403748	ENSBTAG00000013861, ENSBTAG00000002348, ENSBTAG00000014861, ENSBTAG00000007650, ENSBTAG00000003826	182	19	5056	7.31058	0.624332	0.0631854	5.09444
GOTERM_BP_FAT	GO:0006814~sodium ion transport	6	1.16732	0.00499773	ENSBTAG00000013861, ENSBTAG00000002348, ENSBTAG00000014861, ENSBTAG00000020523, ENSBTAG00000007650, ENSBTAG00000003826	198	29	4989	5.21317	0.997861	0.584481	7.80125
GOTERM_BP_FAT	GO:0015672~monovalent inorganic cation transport	11	2.14008	0.00659	ENSBTAG00000008626, ENSBTAG00000019355, ENSBTAG00000013861, ENSBTAG00000002348, ENSBTAG00000014861, ENSBTAG00000011873, ENSBTAG00000020523, ENSBTAG00000007650, ENSBTAG00000010532, ENSBTAG00000008294, ENSBTAG00000003826	198	102	4989	2.71732	0.9997	0.637266	10.1642
GOTERM_BP_FAT	GO:0006812~cation transport	15	2.91829	0.0122146	ENSBTAG00000013861, ENSBTAG00000014861, ENSBTAG00000002770, ENSBTAG00000011873, ENSBTAG00000010532, ENSBTAG00000008294, ENSBTAG00000000945, ENSBTAG00000025642, ENSBTAG00000008626, ENSBTAG00000019355, ENSBTAG00000002348, ENSBTAG00000020523, ENSBTAG00000007650, ENSBTAG00000020031, ENSBTAG00000003826	198	182	4989	2.07667	1	0.71539	18.0643
SP_PIR_KEYWORDS	ion transport	9	1.75097	0.0425277	ENSBTAG00000013861, ENSBTAG00000002348, ENSBTAG00000014861, ENSBTAG00000002770, ENSBTAG00000007650, ENSBTAG00000008294, ENSBTAG00000010244, ENSBTAG00000020031, ENSBTAG00000003826	182	110	5056	2.27293	0.999973	0.366984	42.9749
GOTERM_BP_FAT	GO:0006811~ion transport	16	3.11284	0.0464107	ENSBTAG00000013861, ENSBTAG00000014861, ENSBTAG00000002770, ENSBTAG00000011873, ENSBTAG00000010532, ENSBTAG00000010244, ENSBTAG00000008294, ENSBTAG00000000945, ENSBTAG00000025642, ENSBTAG00000008626, ENSBTAG00000019355, ENSBTAG00000002348, ENSBTAG00000020523, ENSBTAG00000007650, ENSBTAG00000020031, ENSBTAG00000003826	198	237	4989	1.70106	1	0.920754	53.7173
SP_PIR_KEYWORDS	transport	17	3.30739	0.769754	ENSBTAG00000013861, ENSBTAG00000031069, ENSBTAG00000014861, ENSBTAG00000012774, ENSBTAG00000002770, ENSBTAG00000018808, ENSBTAG00000037644, ENSBTAG00000008294, ENSBTAG00000010244, ENSBTAG00000002348, ENSBTAG00000007994, ENSBTAG00000007650, ENSBTAG00000018432, ENSBTAG00000017045, ENSBTAG00000020031, ENSBTAG00000003826, ENSBTAG00000008091	182	517	5056	0.91347	1	0.999862	100
Annotation Cluster 10; Enrichment Score: 1.8
Category	Term	Count	%	PValue	Genes	List Total	Pop Hits	Pop Total	Fold Enrichment	Bonferroni	Benjamini	FDR
GOTERM_BP_FAT	GO:0030001~metal ion transport	15	2.91829	0.00073536	ENSBTAG00000013861, ENSBTAG00000014861, ENSBTAG00000002770, ENSBTAG00000011873, ENSBTAG00000010532, ENSBTAG00000008294, ENSBTAG00000000945, ENSBTAG00000025642, ENSBTAG00000008626, ENSBTAG00000019355, ENSBTAG00000002348, ENSBTAG00000020523, ENSBTAG00000007650, ENSBTAG00000020031, ENSBTAG00000003826	198	134	4989	2.82056	0.594494	0.363206	1.18548
GOTERM_MF_FAT	GO:0005267~potassium channel activity	7	1.36187	0.00151901	ENSBTAG00000004588, ENSBTAG00000008626, ENSBTAG00000019355, ENSBTAG00000011873, ENSBTAG00000010532, ENSBTAG00000008294, ENSBTAG00000020031	196	34	5145	5.40441	0.437938	0.108838	2.08172
GOTERM_MF_FAT	GO:0005261~cation channel activity	9	1.75097	0.00155254	ENSBTAG00000004588, ENSBTAG00000008626, ENSBTAG00000019355, ENSBTAG00000011873, ENSBTAG00000010532, ENSBTAG00000008294, ENSBTAG00000020031, ENSBTAG00000025642, ENSBTAG00000003826	196	59	5145	4.00424	0.445046	0.0934825	2.12721
GOTERM_MF_FAT	GO:0046873~metal ion transmembrane transporter activity	10	1.94553	0.00456606	ENSBTAG00000004588, ENSBTAG00000008626, ENSBTAG00000019355, ENSBTAG00000011873, ENSBTAG00000010532, ENSBTAG00000008294, ENSBTAG00000020031, ENSBTAG00000000945, ENSBTAG00000025642, ENSBTAG00000003826	196	85	5145	3.08824	0.823511	0.159241	6.13685
GOTERM_MF_FAT	GO:0022838~substrate specific channel activity	10	1.94553	0.00619033	ENSBTAG00000004588, ENSBTAG00000008626, ENSBTAG00000019355, ENSBTAG00000011873, ENSBTAG00000010532, ENSBTAG00000008294, ENSBTAG00000010244, ENSBTAG00000020031, ENSBTAG00000025642, ENSBTAG00000003826	196	89	5145	2.94944	0.904957	0.178085	8.23429
GOTERM_MF_FAT	GO:0005216~ion channel activity	10	1.94553	0.00619033	ENSBTAG00000004588, ENSBTAG00000008626, ENSBTAG00000019355, ENSBTAG00000011873, ENSBTAG00000010532, ENSBTAG00000008294, ENSBTAG00000010244, ENSBTAG00000020031, ENSBTAG00000025642, ENSBTAG00000003826	196	89	5145	2.94944	0.904957	0.178085	8.23429
GOTERM_BP_FAT	GO:0015672~monovalent inorganic cation transport	11	2.14008	0.00659	ENSBTAG00000008626, ENSBTAG00000019355, ENSBTAG00000013861, ENSBTAG00000002348, ENSBTAG00000014861, ENSBTAG00000011873, ENSBTAG00000020523, ENSBTAG00000007650, ENSBTAG00000010532, ENSBTAG00000008294, ENSBTAG00000003826	198	102	4989	2.71732	0.9997	0.637266	10.1642
GOTERM_MF_FAT	GO:0015267~channel activity	10	1.94553	0.00715357	ENSBTAG00000004588, ENSBTAG00000008626, ENSBTAG00000019355, ENSBTAG00000011873, ENSBTAG00000010532, ENSBTAG00000008294, ENSBTAG00000010244, ENSBTAG00000020031, ENSBTAG00000025642, ENSBTAG00000003826	196	91	5145	2.88462	0.934188	0.176633	9.45751
GOTERM_MF_FAT	GO:0022803~passive transmembrane transporter activity	10	1.94553	0.00715357	ENSBTAG00000004588, ENSBTAG00000008626, ENSBTAG00000019355, ENSBTAG00000011873, ENSBTAG00000010532, ENSBTAG00000008294, ENSBTAG00000010244, ENSBTAG00000020031, ENSBTAG00000025642, ENSBTAG00000003826	196	91	5145	2.88462	0.934188	0.176633	9.45751
GOTERM_BP_FAT	GO:0006812~cation transport	15	2.91829	0.0122146	ENSBTAG00000013861, ENSBTAG00000014861, ENSBTAG00000002770, ENSBTAG00000011873, ENSBTAG00000010532, ENSBTAG00000008294, ENSBTAG00000000945, ENSBTAG00000025642, ENSBTAG00000008626, ENSBTAG00000019355, ENSBTAG00000002348, ENSBTAG00000020523, ENSBTAG00000007650, ENSBTAG00000020031, ENSBTAG00000003826	198	182	4989	2.07667	1	0.71539	18.0643
GOTERM_MF_FAT	GO:0022836~gated channel activity	8	1.55642	0.0128012	ENSBTAG00000004588, ENSBTAG00000008626, ENSBTAG00000011873, ENSBTAG00000010532, ENSBTAG00000008294, ENSBTAG00000010244, ENSBTAG00000025642, ENSBTAG00000003826	196	67	5145	3.13433	0.992426	0.226631	16.3303
SP_PIR_KEYWORDS	ionic channel	5	0.972763	0.0318784	ENSBTAG00000008626, ENSBTAG00000008294, ENSBTAG00000010244, ENSBTAG00000020031, ENSBTAG00000003826	182	34	5056	4.08533	0.999606	0.311572	34.2113
SP_PIR_KEYWORDS	ion transport	9	1.75097	0.0425277	ENSBTAG00000013861, ENSBTAG00000002348, ENSBTAG00000014861, ENSBTAG00000002770, ENSBTAG00000007650, ENSBTAG00000008294, ENSBTAG00000010244, ENSBTAG00000020031, ENSBTAG00000003826	182	110	5056	2.27293	0.999973	0.366984	42.9749
GOTERM_BP_FAT	GO:0006811~ion transport	16	3.11284	0.0464107	ENSBTAG00000013861, ENSBTAG00000014861, ENSBTAG00000002770, ENSBTAG00000011873, ENSBTAG00000010532, ENSBTAG00000010244, ENSBTAG00000008294, ENSBTAG00000000945, ENSBTAG00000025642, ENSBTAG00000008626, ENSBTAG00000019355, ENSBTAG00000002348, ENSBTAG00000020523, ENSBTAG00000007650, ENSBTAG00000020031, ENSBTAG00000003826	198	237	4989	1.70106	1	0.920754	53.7173
GOTERM_BP_FAT	GO:0006813~potassium ion transport	5	0.972763	0.0713261	ENSBTAG00000008626, ENSBTAG00000019355, ENSBTAG00000011873, ENSBTAG00000010532, ENSBTAG00000008294	198	40	4989	3.14962	1	0.960941	69.8688
GOTERM_MF_FAT	GO:0005244~voltage-gated ion channel activity	5	0.972763	0.0951112	ENSBTAG00000011873, ENSBTAG00000010532, ENSBTAG00000008294, ENSBTAG00000010244, ENSBTAG00000003826	196	46	5145	2.85326	1	0.717087	74.9192
GOTERM_MF_FAT	GO:0022832~voltage-gated channel activity	5	0.972763	0.0951112	ENSBTAG00000011873, ENSBTAG00000010532, ENSBTAG00000008294, ENSBTAG00000010244, ENSBTAG00000003826	196	46	5145	2.85326	1	0.717087	74.9192
GOTERM_BP_FAT	GO:0015674~di-, tri-valent inorganic cation transport	5	0.972763	0.148069	ENSBTAG00000013861, ENSBTAG00000002770, ENSBTAG00000020031, ENSBTAG00000000945, ENSBTAG00000025642	198	52	4989	2.42279	1	0.99434	92.5569
GOTERM_BP_FAT	GO:0006816~calcium ion transport	4	0.77821	0.208623	ENSBTAG00000013861, ENSBTAG00000020031, ENSBTAG00000000945, ENSBTAG00000025642	198	40	4989	2.5197	1	0.997776	97.7476
Annotation Cluster 11; Enrichment Score: 1.6
Category	Term	Count	%	PValue	Genes	List Total	Pop Hits	Pop Total	Fold Enrichment	Bonferroni	Benjamini	FDR
GOTERM_CC_FAT	GO:0005615~extracellular space	16	3.11284	1.51133e-05	ENSBTAG00000018137, ENSBTAG00000006138, ENSBTAG00000011961, ENSBTAG00000017220, ENSBTAG00000007191, ENSBTAG00000031998, ENSBTAG00000021565, ENSBTAG00000012855, ENSBTAG00000014541, ENSBTAG00000004982, ENSBTAG00000001725, ENSBTAG00000002885, ENSBTAG00000019612, ENSBTAG00000025250, ENSBTAG00000003806, ENSBTAG00000003835	159	103	3834	3.74574	0.00297292	0.00148757	0.0188945
GOTERM_BP_FAT	GO:0001568~blood vessel development	6	1.16732	0.123744	ENSBTAG00000002129, ENSBTAG00000006138, ENSBTAG00000014541, ENSBTAG00000007421, ENSBTAG00000019612, ENSBTAG00000003835	198	67	4989	2.25645	1	0.991495	88.2519
GOTERM_BP_FAT	GO:0001944~vasculature development	6	1.16732	0.129547	ENSBTAG00000002129, ENSBTAG00000006138, ENSBTAG00000014541, ENSBTAG00000007421, ENSBTAG00000019612, ENSBTAG00000003835	198	68	4989	2.22326	1	0.99228	89.4517
GOTERM_BP_FAT	GO:0048514~blood vessel morphogenesis	5	0.972763	0.178733	ENSBTAG00000002129, ENSBTAG00000006138, ENSBTAG00000014541, ENSBTAG00000019612, ENSBTAG00000003835	198	56	4989	2.24973	1	0.997241	95.8917
GOTERM_BP_FAT	GO:0001525~angiogenesis	4	0.77821	0.188158	ENSBTAG00000002129, ENSBTAG00000014541, ENSBTAG00000019612, ENSBTAG00000003835	198	38	4989	2.65231	1	0.997011	96.5928
Annotation Cluster 12; Enrichment Score: 1.4
Category	Term	Count	%	PValue	Genes	List Total	Pop Hits	Pop Total	Fold Enrichment	Bonferroni	Benjamini	FDR
GOTERM_MF_FAT	GO:0016702~oxidoreductase activity, acting on single donors with incorporation of molecular oxygen, incorporation of two atoms of oxygen	6	1.16732	0.000723402	ENSBTAG00000020602, ENSBTAG00000002052, ENSBTAG00000007700, ENSBTAG00000026283, ENSBTAG00000014127, ENSBTAG00000004674	196	20	5145	7.875	0.239872	0.128147	0.996449
GOTERM_MF_FAT	GO:0016701~oxidoreductase activity, acting on single donors with incorporation of molecular oxygen	6	1.16732	0.000920564	ENSBTAG00000020602, ENSBTAG00000002052, ENSBTAG00000007700, ENSBTAG00000026283, ENSBTAG00000014127, ENSBTAG00000004674	196	21	5145	7.5	0.294645	0.0835645	1.26643
SP_PIR_KEYWORDS	dioxygenase	5	0.972763	0.00262197	ENSBTAG00000002052, ENSBTAG00000007700, ENSBTAG00000026283, ENSBTAG00000014127, ENSBTAG00000004674	182	17	5056	8.17065	0.47025	0.0515686	3.33629
GOTERM_MF_FAT	GO:0005506~iron ion binding	12	2.33463	0.00986292	ENSBTAG00000020602, ENSBTAG00000002052, ENSBTAG00000007111, ENSBTAG00000007700, ENSBTAG00000026283, ENSBTAG00000016061, ENSBTAG00000011616, ENSBTAG00000037644, ENSBTAG00000016761, ENSBTAG00000026501, ENSBTAG00000014127, ENSBTAG00000004674	196	130	5145	2.42308	0.976637	0.198265	12.8175
SP_PIR_KEYWORDS	iron	8	1.55642	0.0844554	ENSBTAG00000002052, ENSBTAG00000007700, ENSBTAG00000026283, ENSBTAG00000016061, ENSBTAG00000037644, ENSBTAG00000026501, ENSBTAG00000014127, ENSBTAG00000004674	182	106	5056	2.09662	1	0.546544	68.0311
SP_PIR_KEYWORDS	oxidoreductase	14	2.72374	0.116159	ENSBTAG00000002052, ENSBTAG00000007700, ENSBTAG00000016867, ENSBTAG00000012387, ENSBTAG00000012128, ENSBTAG00000026501, ENSBTAG00000011927, ENSBTAG00000001793, ENSBTAG00000002346, ENSBTAG00000039555, ENSBTAG00000020729, ENSBTAG00000026283, ENSBTAG00000014127, ENSBTAG00000004674	182	252	5056	1.54335	1	0.618608	79.7272
GOTERM_BP_FAT	GO:0055114~oxidation reduction	17	3.30739	0.197718	ENSBTAG00000002052, ENSBTAG00000007700, ENSBTAG00000012128, ENSBTAG00000016867, ENSBTAG00000012387, ENSBTAG00000016761, ENSBTAG00000026501, ENSBTAG00000011927, ENSBTAG00000001793, ENSBTAG00000002346, ENSBTAG00000020729, ENSBTAG00000016142, ENSBTAG00000012023, ENSBTAG00000019321, ENSBTAG00000026283, ENSBTAG00000014127, ENSBTAG00000004674	198	321	4989	1.33442	1	0.997538	97.1881
SP_PIR_KEYWORDS	endoplasmic reticulum	8	1.55642	0.67612	ENSBTAG00000001580, ENSBTAG00000002052, ENSBTAG00000001154, ENSBTAG00000026283, ENSBTAG00000016061, ENSBTAG00000026501, ENSBTAG00000020031, ENSBTAG00000014127	182	219	5056	1.0148	1	0.999084	100
GOTERM_CC_FAT	GO:0005783~endoplasmic reticulum	10	1.94553	0.949888	ENSBTAG00000001580, ENSBTAG00000002052, ENSBTAG00000006349, ENSBTAG00000025161, ENSBTAG00000001154, ENSBTAG00000026283, ENSBTAG00000016061, ENSBTAG00000026501, ENSBTAG00000014127, ENSBTAG00000011927	159	340	3834	0.709212	1	1	100
SP_PIR_KEYWORDS	metal-binding	17	3.30739	0.995182	ENSBTAG00000016208, ENSBTAG00000005734, ENSBTAG00000002052, ENSBTAG00000038706, ENSBTAG00000007700, ENSBTAG00000008816, ENSBTAG00000012387, ENSBTAG00000037644, ENSBTAG00000020178, ENSBTAG00000026501, ENSBTAG00000021565, ENSBTAG00000005534, ENSBTAG00000012338, ENSBTAG00000016061, ENSBTAG00000014127, ENSBTAG00000008943, ENSBTAG00000004674	182	754	5056	0.626344	1	1	100
Annotation Cluster 13; Enrichment Score: 1.2
Category	Term	Count	%	PValue	Genes	List Total	Pop Hits	Pop Total	Fold Enrichment	Bonferroni	Benjamini	FDR
SP_PIR_KEYWORDS	calcium	15	2.91829	0.00182078	ENSBTAG00000013861, ENSBTAG00000016208, ENSBTAG00000001580, ENSBTAG00000020178, ENSBTAG00000020554, ENSBTAG00000009786, ENSBTAG00000021565, ENSBTAG00000009836, ENSBTAG00000008336, ENSBTAG00000007421, ENSBTAG00000012338, ENSBTAG00000021964, ENSBTAG00000000512, ENSBTAG00000016343, ENSBTAG00000020031	182	162	5056	2.57224	0.356627	0.0431446	2.32788
GOTERM_MF_FAT	GO:0005509~calcium ion binding	18	3.50195	0.00974873	ENSBTAG00000013861, ENSBTAG00000016208, ENSBTAG00000001580, ENSBTAG00000001801, ENSBTAG00000020178, ENSBTAG00000025642, ENSBTAG00000021565, ENSBTAG00000020554, ENSBTAG00000009786, ENSBTAG00000009836, ENSBTAG00000008336, ENSBTAG00000001662, ENSBTAG00000007421, ENSBTAG00000012338, ENSBTAG00000021964, ENSBTAG00000000512, ENSBTAG00000020031, ENSBTAG00000016343	196	242	5145	1.95248	0.975593	0.207098	12.6782
INTERPRO	IPR018247:EF-HAND 1	5	0.972763	0.301228	ENSBTAG00000020554, ENSBTAG00000008336, ENSBTAG00000001662, ENSBTAG00000020031, ENSBTAG00000016343	232	76	6326	1.7939	1	0.999912	99.3995
INTERPRO	IPR018249:EF-HAND 2	5	0.972763	0.309543	ENSBTAG00000020554, ENSBTAG00000008336, ENSBTAG00000001662, ENSBTAG00000020031, ENSBTAG00000016343	232	77	6326	1.7706	1	0.999893	99.4938
INTERPRO	IPR011992:EF-Hand type	4	0.77821	0.597615	ENSBTAG00000020554, ENSBTAG00000008336, ENSBTAG00000001662, ENSBTAG00000016343	232	84	6326	1.29844	1	1	99.9998
Annotation Cluster 14; Enrichment Score: 1.2
Category	Term	Count	%	PValue	Genes	List Total	Pop Hits	Pop Total	Fold Enrichment	Bonferroni	Benjamini	FDR
GOTERM_BP_FAT	GO:0030324~lung development	5	0.972763	0.0202945	ENSBTAG00000014541, ENSBTAG00000005734, ENSBTAG00000007173, ENSBTAG00000002333, ENSBTAG00000003835	198	27	4989	4.66611	1	0.855603	28.279
GOTERM_BP_FAT	GO:0030323~respiratory tube development	5	0.972763	0.0202945	ENSBTAG00000014541, ENSBTAG00000005734, ENSBTAG00000007173, ENSBTAG00000002333, ENSBTAG00000003835	198	27	4989	4.66611	1	0.855603	28.279
GOTERM_BP_FAT	GO:0060541~respiratory system development	5	0.972763	0.0202945	ENSBTAG00000014541, ENSBTAG00000005734, ENSBTAG00000007173, ENSBTAG00000002333, ENSBTAG00000003835	198	27	4989	4.66611	1	0.855603	28.279
GOTERM_BP_FAT	GO:0035295~tube development	6	1.16732	0.0566301	ENSBTAG00000021245, ENSBTAG00000014541, ENSBTAG00000005734, ENSBTAG00000007173, ENSBTAG00000002333, ENSBTAG00000003835	198	53	4989	2.85249	1	0.9428	61.135
GOTERM_BP_FAT	GO:0043009~chordate embryonic development	6	1.16732	0.455599	ENSBTAG00000005734, ENSBTAG00000007173, ENSBTAG00000015311, ENSBTAG00000002333, ENSBTAG00000020031, ENSBTAG00000003835	198	112	4989	1.34984	1	0.999958	99.9948
GOTERM_BP_FAT	GO:0009792~embryonic development ending in birth or egg hatching	6	1.16732	0.463379	ENSBTAG00000005734, ENSBTAG00000007173, ENSBTAG00000015311, ENSBTAG00000002333, ENSBTAG00000020031, ENSBTAG00000003835	198	113	4989	1.33789	1	0.999962	99.9959
Annotation Cluster 15; Enrichment Score: 1.2
Category	Term	Count	%	PValue	Genes	List Total	Pop Hits	Pop Total	Fold Enrichment	Bonferroni	Benjamini	FDR
GOTERM_BP_FAT	GO:0051047~positive regulation of secretion	4	0.77821	0.0421341	ENSBTAG00000004588, ENSBTAG00000009786, ENSBTAG00000007642, ENSBTAG00000019612	198	20	4989	5.03939	1	0.909361	50.2352
GOTERM_BP_FAT	GO:0051050~positive regulation of transport	6	1.16732	0.0493373	ENSBTAG00000004588, ENSBTAG00000009786, ENSBTAG00000007642, ENSBTAG00000019612, ENSBTAG00000009012, ENSBTAG00000003835	198	51	4989	2.96435	1	0.924733	55.9671
GOTERM_BP_FAT	GO:0051046~regulation of secretion	5	0.972763	0.0713261	ENSBTAG00000004588, ENSBTAG00000009786, ENSBTAG00000009836, ENSBTAG00000007642, ENSBTAG00000019612	198	40	4989	3.14962	1	0.960941	69.8688
GOTERM_BP_FAT	GO:0060341~regulation of cellular localization	5	0.972763	0.148069	ENSBTAG00000004588, ENSBTAG00000009836, ENSBTAG00000007642, ENSBTAG00000019612, ENSBTAG00000003835	198	52	4989	2.42279	1	0.99434	92.5569
Annotation Cluster 16; Enrichment Score: 1.0
Category	Term	Count	%	PValue	Genes	List Total	Pop Hits	Pop Total	Fold Enrichment	Bonferroni	Benjamini	FDR
GOTERM_CC_FAT	GO:0016327~apicolateral plasma membrane	4	0.77821	0.0737736	ENSBTAG00000017685, ENSBTAG00000004869, ENSBTAG00000007421, ENSBTAG00000017564	159	24	3834	4.01887	1	0.779033	61.6411
GOTERM_CC_FAT	GO:0043296~apical junction complex	4	0.77821	0.0737736	ENSBTAG00000017685, ENSBTAG00000004869, ENSBTAG00000007421, ENSBTAG00000017564	159	24	3834	4.01887	1	0.779033	61.6411
GOTERM_CC_FAT	GO:0005911~cell-cell junction	5	0.972763	0.0864411	ENSBTAG00000017685, ENSBTAG00000004869, ENSBTAG00000007421, ENSBTAG00000017564, ENSBTAG00000003920	159	41	3834	2.94064	1	0.773314	67.7083
GOTERM_CC_FAT	GO:0030054~cell junction	7	1.36187	0.189602	ENSBTAG00000017685, ENSBTAG00000004869, ENSBTAG00000007421, ENSBTAG00000004580, ENSBTAG00000000512, ENSBTAG00000017564, ENSBTAG00000003920	159	94	3834	1.79566	1	0.948089	92.7812
Annotation Cluster 17, Enrichment Score: 1.0
Category	Term	Count	%	PValue	Genes	List Total	Pop Hits	Pop Total	Fold Enrichment	Bonferroni	Benjamini	FDR
UP_SEQ_FEATURE	binding site:Substrate	10	1.94553	0.00922316	ENSBTAG00000004950, ENSBTAG00000005534, ENSBTAG00000000795, ENSBTAG00000012338, ENSBTAG00000019612, ENSBTAG00000008792, ENSBTAG00000020178, ENSBTAG00000011927, ENSBTAG00000004674, ENSBTAG00000001793	131	111	4012	2.75909	0.976546	0.414976	12.1444
UP_SEQ_FEATURE	region of interest:Substrate binding	4	0.77821	0.219507	ENSBTAG00000004950, ENSBTAG00000005534, ENSBTAG00000019612, ENSBTAG00000008792	131	50	4012	2.45008	1	0.999986	96.8664
UP_SEQ_FEATURE	active site:Proton donor	4	0.77821	0.245524	ENSBTAG00000004950, ENSBTAG00000005534, ENSBTAG00000019612, ENSBTAG00000008792	131	53	4012	2.31139	1	0.999989	98.0488
UP_SEQ_FEATURE	active site:Proton acceptor	8	1.55642	0.245532	ENSBTAG00000004950, ENSBTAG00000005534, ENSBTAG00000012338, ENSBTAG00000019612, ENSBTAG00000008792, ENSBTAG00000014127, ENSBTAG00000011927, ENSBTAG00000001793	131	157	4012	1.56056	1	0.999969	98.0491
Annotation Cluster 18; Enrichment Score: 0.8
Category	Term	Count	%	PValue	Genes	List Total	Pop Hits	Pop Total	Fold Enrichment	Bonferroni	Benjamini	FDR
SP_PIR_KEYWORDS	calcium	15	2.91829	0.00182078	ENSBTAG00000013861, ENSBTAG00000016208, ENSBTAG00000001580, ENSBTAG00000020178, ENSBTAG00000020554, ENSBTAG00000009786, ENSBTAG00000021565, ENSBTAG00000009836, ENSBTAG00000008336, ENSBTAG00000007421, ENSBTAG00000012338, ENSBTAG00000021964, ENSBTAG00000000512, ENSBTAG00000016343, ENSBTAG00000020031	182	162	5056	2.57224	0.356627	0.0431446	2.32788
GOTERM_MF_FAT	GO:0005509~calcium ion binding	18	3.50195	0.00974873	ENSBTAG00000013861, ENSBTAG00000016208, ENSBTAG00000001580, ENSBTAG00000001801, ENSBTAG00000020178, ENSBTAG00000025642, ENSBTAG00000021565, ENSBTAG00000020554, ENSBTAG00000009786, ENSBTAG00000009836, ENSBTAG00000008336, ENSBTAG00000001662, ENSBTAG00000007421, ENSBTAG00000012338, ENSBTAG00000021964, ENSBTAG00000000512, ENSBTAG00000020031, ENSBTAG00000016343	196	242	5145	1.95248	0.975593	0.207098	12.6782
GOTERM_MF_FAT	GO:0043167~ion binding	62	12.0623	0.229483	ENSBTAG00000001801, ENSBTAG00000007111, ENSBTAG00000002770, ENSBTAG00000008732, ENSBTAG00000040585, ENSBTAG00000011936, ENSBTAG00000010244, ENSBTAG00000008294, ENSBTAG00000021565, ENSBTAG00000003763, ENSBTAG00000002348, ENSBTAG00000003826, ENSBTAG00000005973, ENSBTAG00000020178, ENSBTAG00000026501, ENSBTAG00000020554, ENSBTAG00000009836, ENSBTAG00000008336, ENSBTAG00000001662, ENSBTAG00000026283,…	196	1476	5145	1.10264	1	0.910169	97.2884
GOTERM_MF_FAT	GO:0043169~cation binding	61	11.8677	0.264114	ENSBTAG00000007111, ENSBTAG00000002770, ENSBTAG00000001801, ENSBTAG00000008732, ENSBTAG00000040585, ENSBTAG00000011936, ENSBTAG00000008294, ENSBTAG00000021565, ENSBTAG00000003763, ENSBTAG00000002348, ENSBTAG00000003826, ENSBTAG00000005973, ENSBTAG00000020178, ENSBTAG00000026501, ENSBTAG00000020554, ENSBTAG00000009836, ENSBTAG00000008336, ENSBTAG00000001662, ENSBTAG00000026283, ENSBTAG00000007650,…	196	1468	5145	1.09077	1	0.937176	98.565
GOTERM_MF_FAT	GO:0046872~metal ion binding	60	11.6732	0.27604	ENSBTAG00000007111, ENSBTAG00000002770, ENSBTAG00000001801, ENSBTAG00000008732, ENSBTAG00000040585, ENSBTAG00000011936, ENSBTAG00000008294, ENSBTAG00000021565, ENSBTAG00000003763, ENSBTAG00000002348, ENSBTAG00000003826, ENSBTAG00000020178, ENSBTAG00000026501, ENSBTAG00000020554, ENSBTAG00000009836, ENSBTAG00000001662, ENSBTAG00000008336, ENSBTAG00000026283, ENSBTAG00000007650, ENSBTAG00000016061,…	196	1448	5145	1.08771	1	0.941986	98.8554
GOTERM_MF_FAT	GO:0046914~transition metal ion binding	32	6.22568	0.976285	ENSBTAG00000002129, ENSBTAG00000005734, ENSBTAG00000002052, ENSBTAG00000020602, ENSBTAG00000002770, ENSBTAG00000007111, ENSBTAG00000008732, ENSBTAG00000008816, ENSBTAG00000040585, ENSBTAG00000037800, ENSBTAG00000037644, ENSBTAG00000003901, ENSBTAG00000016761, ENSBTAG00000016137, ENSBTAG00000013496, ENSBTAG00000020890, ENSBTAG00000003763, ENSBTAG00000007700, ENSBTAG00000012387, ENSBTAG00000026501,…	196	1090	5145	0.770642	1	1	100
SP_PIR_KEYWORDS	metal-binding	17	3.30739	0.995182	ENSBTAG00000016208, ENSBTAG00000005734, ENSBTAG00000002052, ENSBTAG00000038706, ENSBTAG00000007700, ENSBTAG00000008816, ENSBTAG00000012387, ENSBTAG00000037644, ENSBTAG00000020178, ENSBTAG00000026501, ENSBTAG00000021565, ENSBTAG00000005534, ENSBTAG00000012338, ENSBTAG00000016061, ENSBTAG00000014127, ENSBTAG00000008943, ENSBTAG00000004674	182	754	5056	0.626344	1	1	100
GOTERM_MF_FAT	GO:0008270~zinc ion binding	18	3.50195	0.999844	ENSBTAG00000002129, ENSBTAG00000005734, ENSBTAG00000008732, ENSBTAG00000008816, ENSBTAG00000012387, ENSBTAG00000040585, ENSBTAG00000037800, ENSBTAG00000003901, ENSBTAG00000011545, ENSBTAG00000005017, ENSBTAG00000016137, ENSBTAG00000020890, ENSBTAG00000013496, ENSBTAG00000003763, ENSBTAG00000007917, ENSBTAG00000038916, ENSBTAG00000008313, ENSBTAG00000008943	196	892	5145	0.529709	1	1	100
Annotation Cluster 19; Enrichment Score: 0.8
Category	Term	Count	%	PValue	Genes	List Total	Pop Hits	Pop Total	Fold Enrichment	Bonferroni	Benjamini	FDR
GOTERM_MF_FAT	GO:0004252~serine-type endopeptidase activity	6	1.16732	0.0107626	ENSBTAG00000021565, ENSBTAG00000008389, ENSBTAG00000021958, ENSBTAG00000007450, ENSBTAG00000016204, ENSBTAG00000002100	196	36	5145	4.375	0.983446	0.203749	13.9074
GOTERM_MF_FAT	GO:0008236~serine-type peptidase activity	6	1.16732	0.0265469	ENSBTAG00000021565, ENSBTAG00000008389, ENSBTAG00000021958, ENSBTAG00000007450, ENSBTAG00000016204, ENSBTAG00000002100	196	45	5145	3.5	0.999963	0.358123	31.0877
GOTERM_MF_FAT	GO:0017171~serine hydrolase activity	6	1.16732	0.0288991	ENSBTAG00000021565, ENSBTAG00000008389, ENSBTAG00000021958, ENSBTAG00000007450, ENSBTAG00000016204, ENSBTAG00000002100	196	46	5145	3.42391	0.999985	0.370663	33.3566
GOTERM_MF_FAT	GO:0004175~endopeptidase activity	6	1.16732	0.551887	ENSBTAG00000021565, ENSBTAG00000008389, ENSBTAG00000021958, ENSBTAG00000007450, ENSBTAG00000016204, ENSBTAG00000002100	196	130	5145	1.21154	1	0.998232	99.9985
GOTERM_MF_FAT	GO:0070011~peptidase activity, acting on L-amino acid peptides	7	1.36187	0.761155	ENSBTAG00000013496, ENSBTAG00000021565, ENSBTAG00000008389, ENSBTAG00000021958, ENSBTAG00000007450, ENSBTAG00000016204, ENSBTAG00000002100	196	196	5145	0.9375	1	0.999971	100
GOTERM_MF_FAT	GO:0008233~peptidase activity	7	1.36187	0.79762	ENSBTAG00000013496, ENSBTAG00000021565, ENSBTAG00000008389, ENSBTAG00000021958, ENSBTAG00000007450, ENSBTAG00000016204, ENSBTAG00000002100	196	205	5145	0.896341	1	0.999989	100
GOTERM_BP_FAT	GO:0006508~proteolysis	9	1.75097	0.978968	ENSBTAG00000013496, ENSBTAG00000021565, ENSBTAG00000014707, ENSBTAG00000008389, ENSBTAG00000021958, ENSBTAG00000007450, ENSBTAG00000016204, ENSBTAG00000002100, ENSBTAG00000007223	198	362	4989	0.626444	1	1	100
Annotation Cluster 20; Enrichment Score: 0.7
Category	Term	Count	%	PValue	Genes	List Total	Pop Hits	Pop Total	Fold Enrichment	Bonferroni	Benjamini	FDR
KEGG_PATHWAY	bta05218:Melanoma	5	0.972763	0.0748055	ENSBTAG00000014541, ENSBTAG00000007173, ENSBTAG00000008353, ENSBTAG00000006679, ENSBTAG00000014400	126	38	2949	3.07957	0.999791	0.756462	58.396
KEGG_PATHWAY	bta05200:Pathways in cancer	12	2.33463	0.243834	ENSBTAG00000014541, ENSBTAG00000017685, ENSBTAG00000004322, ENSBTAG00000000793, ENSBTAG00000007173, ENSBTAG00000002283, ENSBTAG00000040128, ENSBTAG00000008353, ENSBTAG00000006679, ENSBTAG00000014127, ENSBTAG00000014400, ENSBTAG00000003835	126	204	2949	1.37675	1	0.904005	95.7254
KEGG_PATHWAY	bta05215:Prostate cancer	5	0.972763	0.248373	ENSBTAG00000014541, ENSBTAG00000006143, ENSBTAG00000007173, ENSBTAG00000008353, ENSBTAG00000014400	126	60	2949	1.9504	1	0.89171	96.006
KEGG_PATHWAY	bta05214:Glioma	4	0.77821	0.285637	ENSBTAG00000014541, ENSBTAG00000007173, ENSBTAG00000008353, ENSBTAG00000014400	126	44	2949	2.12771	1	0.898883	97.7493
Annotation Cluster 21; Enrichment Score: 0.7
Category	Term	Count	%	PValue	Genes	List Total	Pop Hits	Pop Total	Fold Enrichment	Bonferroni	Benjamini	FDR
GOTERM_BP_FAT	GO:0007015~actin filament organization	4	0.77821	0.0600827	ENSBTAG00000009786, ENSBTAG00000020554, ENSBTAG00000024426, ENSBTAG00000019612	198	23	4989	4.38208	1	0.946292	63.3778
GOTERM_BP_FAT	GO:0030036~actin cytoskeleton organization	5	0.972763	0.203013	ENSBTAG00000009786, ENSBTAG00000020554, ENSBTAG00000014541, ENSBTAG00000024426, ENSBTAG00000019612	198	59	4989	2.13534	1	0.997649	97.4743
GOTERM_CC_FAT	GO:0042995~cell projection	9	1.75097	0.20726	ENSBTAG00000020554, ENSBTAG00000013078, ENSBTAG00000014541, ENSBTAG00000001801, ENSBTAG00000024426, ENSBTAG00000019612, ENSBTAG00000010244, ENSBTAG00000020031, ENSBTAG00000007223	159	138	3834	1.5726	1	0.942714	94.5193
GOTERM_BP_FAT	GO:0030029~actin filament-based process	5	0.972763	0.211317	ENSBTAG00000009786, ENSBTAG00000020554, ENSBTAG00000014541, ENSBTAG00000024426, ENSBTAG00000019612	198	60	4989	2.09975	1	0.997685	97.8687
GOTERM_BP_FAT	GO:0007010~cytoskeleton organization	6	1.16732	0.471127	ENSBTAG00000038974, ENSBTAG00000009786, ENSBTAG00000020554, ENSBTAG00000014541, ENSBTAG00000024426, ENSBTAG00000019612	198	114	4989	1.32616	1	0.999966	99.9967
Annotation Cluster 22; Enrichment Score: 0.7
Category	Term	Count	%	PValue	Genes	List Total	Pop Hits	Pop Total	Fold Enrichment	Bonferroni	Benjamini	FDR
SP_PIR_KEYWORDS	oxidoreductase	14	2.72374	0.116159	ENSBTAG00000002052, ENSBTAG00000007700, ENSBTAG00000016867, ENSBTAG00000012387, ENSBTAG00000012128, ENSBTAG00000026501, ENSBTAG00000011927, ENSBTAG00000001793, ENSBTAG00000002346, ENSBTAG00000039555, ENSBTAG00000020729, ENSBTAG00000026283, ENSBTAG00000014127, ENSBTAG00000004674	182	252	5056	1.54335	1	0.618608	79.7272
INTERPRO	IPR002347:Glucose/ribitol dehydrogenase	4	0.77821	0.134266	ENSBTAG00000020729, ENSBTAG00000016867, ENSBTAG00000011927, ENSBTAG00000001793	232	35	6326	3.11626	1	0.988979	87.2231
INTERPRO	IPR002198:Short-chain dehydrogenase/reductase SDR	4	0.77821	0.178338	ENSBTAG00000020729, ENSBTAG00000016867, ENSBTAG00000011927, ENSBTAG00000001793	232	40	6326	2.72672	1	0.996842	93.9381
GOTERM_BP_FAT	GO:0055114~oxidation reduction	17	3.30739	0.197718	ENSBTAG00000002052, ENSBTAG00000007700, ENSBTAG00000012128, ENSBTAG00000016867, ENSBTAG00000012387, ENSBTAG00000016761, ENSBTAG00000026501, ENSBTAG00000011927, ENSBTAG00000001793, ENSBTAG00000002346, ENSBTAG00000020729, ENSBTAG00000016142, ENSBTAG00000012023, ENSBTAG00000019321, ENSBTAG00000026283, ENSBTAG00000014127, ENSBTAG00000004674	198	321	4989	1.33442	1	0.997538	97.1881
INTERPRO	IPR016040:NAD(P)-binding domain	5	0.972763	0.483434	ENSBTAG00000002346, ENSBTAG00000020729, ENSBTAG00000016867, ENSBTAG00000011927, ENSBTAG00000001793	232	98	6326	1.39119	1	1	99.9919
Annotation Cluster 23; Enrichment Score: 0.6
Category	Term	Count	%	PValue	Genes	List Total	Pop Hits	Pop Total	Fold Enrichment	Bonferroni	Benjamini	FDR
GOTERM_CC_FAT	GO:0015629~actin cytoskeleton	8	1.55642	0.0118542	ENSBTAG00000020554, ENSBTAG00000003763, ENSBTAG00000015527, ENSBTAG00000024426, ENSBTAG00000017564, ENSBTAG00000010244, ENSBTAG00000020031, ENSBTAG00000013953	159	61	3834	3.16239	0.904558	0.285095	13.8516
GOTERM_CC_FAT	GO:0044430~cytoskeletal part	15	2.91829	0.0845652	ENSBTAG00000004472, ENSBTAG00000013078, ENSBTAG00000010244, ENSBTAG00000013953, ENSBTAG00000003763, ENSBTAG00000020554, ENSBTAG00000007904, ENSBTAG00000012030, ENSBTAG00000015527, ENSBTAG00000020824, ENSBTAG00000024426, ENSBTAG00000017574, ENSBTAG00000017564, ENSBTAG00000022461, ENSBTAG00000020031	159	228	3834	1.5864	1	0.794514	66.8693
GOTERM_CC_FAT	GO:0042995~cell projection	9	1.75097	0.20726	ENSBTAG00000020554, ENSBTAG00000013078, ENSBTAG00000014541, ENSBTAG00000001801, ENSBTAG00000024426, ENSBTAG00000019612, ENSBTAG00000010244, ENSBTAG00000020031, ENSBTAG00000007223	159	138	3834	1.5726	1	0.942714	94.5193
GOTERM_CC_FAT	GO:0005856~cytoskeleton	18	3.50195	0.259556	ENSBTAG00000004472, ENSBTAG00000013078, ENSBTAG00000010244, ENSBTAG00000013953, ENSBTAG00000003763, ENSBTAG00000020554, ENSBTAG00000017685, ENSBTAG00000007904, ENSBTAG00000012030, ENSBTAG00000015527, ENSBTAG00000020824, ENSBTAG00000024426, ENSBTAG00000017574, ENSBTAG00000017564, ENSBTAG00000000512, ENSBTAG00000017063, ENSBTAG00000022461, ENSBTAG00000020031	159	347	3834	1.25083	1	0.940336	97.6651
SP_PIR_KEYWORDS	cytoskeleton	6	1.16732	0.64091	ENSBTAG00000017685, ENSBTAG00000012030, ENSBTAG00000000512, ENSBTAG00000022461, ENSBTAG00000010244, ENSBTAG00000013953	182	152	5056	1.09659	1	0.99853	99.9998
GOTERM_CC_FAT	GO:0043228~non-membrane-bounded organelle	25	4.86381	0.970782	ENSBTAG00000004472, ENSBTAG00000013078, ENSBTAG00000011677, ENSBTAG00000040367, ENSBTAG00000003901, ENSBTAG00000010244, ENSBTAG00000008545, ENSBTAG00000013953, ENSBTAG00000003763, ENSBTAG00000007904, ENSBTAG00000017574, ENSBTAG00000024426, ENSBTAG00000022461, ENSBTAG00000039657, ENSBTAG00000020554, ENSBTAG00000012567, ENSBTAG00000017685, ENSBTAG00000012030, ENSBTAG00000020824, ENSBTAG00000015527,…	159	793	3834	0.760189	1	1	100
GOTERM_CC_FAT	GO:0043232~intracellular non-membrane-bounded organelle	25	4.86381	0.970782	ENSBTAG00000004472, ENSBTAG00000013078, ENSBTAG00000011677, ENSBTAG00000040367, ENSBTAG00000003901, ENSBTAG00000010244, ENSBTAG00000008545, ENSBTAG00000013953, ENSBTAG00000003763, ENSBTAG00000007904, ENSBTAG00000017574, ENSBTAG00000024426, ENSBTAG00000022461, ENSBTAG00000039657, ENSBTAG00000020554, ENSBTAG00000012567, ENSBTAG00000017685, ENSBTAG00000012030, ENSBTAG00000020824, ENSBTAG00000015527,…	159	793	3834	0.760189	1	1	100
Annotation Cluster 24; Enrichment Score: 0.4
Category	Term	Count	%	PValue	Genes	List Total	Pop Hits	Pop Total	Fold Enrichment	Bonferroni	Benjamini	FDR
GOTERM_BP_FAT	GO:0050865~regulation of cell activation	5	0.972763	0.343801	ENSBTAG00000014541, ENSBTAG00000011563, ENSBTAG00000007642, ENSBTAG00000008353, ENSBTAG00000013569	198	75	4989	1.6798	1	0.999648	99.8919
GOTERM_BP_FAT	GO:0002696~positive regulation of leukocyte activation	4	0.77821	0.392519	ENSBTAG00000011563, ENSBTAG00000007642, ENSBTAG00000008353, ENSBTAG00000013569	198	57	4989	1.76821	1	0.999859	99.969
GOTERM_BP_FAT	GO:0050867~positive regulation of cell activation	4	0.77821	0.414033	ENSBTAG00000011563, ENSBTAG00000007642, ENSBTAG00000008353, ENSBTAG00000013569	198	59	4989	1.70827	1	0.999903	99.9827
GOTERM_BP_FAT	GO:0002684~positive regulation of immune system process	6	1.16732	0.416308	ENSBTAG00000020602, ENSBTAG00000011563, ENSBTAG00000007642, ENSBTAG00000007450, ENSBTAG00000008353, ENSBTAG00000013569	198	107	4989	1.41291	1	0.999896	99.9838
GOTERM_BP_FAT	GO:0002694~regulation of leukocyte activation	4	0.77821	0.546152	ENSBTAG00000011563, ENSBTAG00000007642, ENSBTAG00000008353, ENSBTAG00000013569	198	72	4989	1.39983	1	0.999994	99.9997
Annotation Cluster 25; Enrichment Score: 0.3
Category	Term	Count	%	PValue	Genes	List Total	Pop Hits	Pop Total	Fold Enrichment	Bonferroni	Benjamini	FDR
GOTERM_MF_FAT	GO:0003700~transcription factor activity	14	2.72374	0.0771526	ENSBTAG00000002129, ENSBTAG00000022360, ENSBTAG00000005734, ENSBTAG00000008182, ENSBTAG00000040585, ENSBTAG00000002333, ENSBTAG00000008545, ENSBTAG00000020713, ENSBTAG00000007917, ENSBTAG00000002835, ENSBTAG00000004322, ENSBTAG00000008313, ENSBTAG00000043953, ENSBTAG00000008943	196	222	5145	1.65541	1	0.662706	67.0809
GOTERM_BP_FAT	GO:0010628~positive regulation of gene expression	10	1.94553	0.111057	ENSBTAG00000002129, ENSBTAG00000032132, ENSBTAG00000005734, ENSBTAG00000002835, ENSBTAG00000022360, ENSBTAG00000004322, ENSBTAG00000011563, ENSBTAG00000008313, ENSBTAG00000003901, ENSBTAG00000003835	198	143	4989	1.76203	1	0.987439	85.169
GOTERM_BP_FAT	GO:0007167~enzyme linked receptor protein signaling pathway	7	1.36187	0.13843	ENSBTAG00000004885, ENSBTAG00000014541, ENSBTAG00000002835, ENSBTAG00000004322, ENSBTAG00000007173, ENSBTAG00000005092, ENSBTAG00000003835	198	89	4989	1.98178	1	0.992854	91.0677
GOTERM_BP_FAT	GO:0051173~positive regulation of nitrogen compound metabolic process	10	1.94553	0.180139	ENSBTAG00000002129, ENSBTAG00000032132, ENSBTAG00000014541, ENSBTAG00000005734, ENSBTAG00000002835, ENSBTAG00000022360, ENSBTAG00000004322, ENSBTAG00000008313, ENSBTAG00000009012, ENSBTAG00000003835	198	160	4989	1.57481	1	0.99698	96.0042
GOTERM_MF_FAT	GO:0043565~sequence-specific DNA binding	9	1.75097	0.19806	ENSBTAG00000020713, ENSBTAG00000007917, ENSBTAG00000005734, ENSBTAG00000008182, ENSBTAG00000004322, ENSBTAG00000043953, ENSBTAG00000040585, ENSBTAG00000002333, ENSBTAG00000008545	196	148	5145	1.59628	1	0.889352	95.2852
GOTERM_BP_FAT	GO:0031328~positive regulation of cellular biosynthetic process	10	1.94553	0.243374	ENSBTAG00000002129, ENSBTAG00000032132, ENSBTAG00000014541, ENSBTAG00000005734, ENSBTAG00000002835, ENSBTAG00000022360, ENSBTAG00000004322, ENSBTAG00000008313, ENSBTAG00000009012, ENSBTAG00000003835	198	173	4989	1.45647	1	0.998781	98.9123
GOTERM_BP_FAT	GO:0009891~positive regulation of biosynthetic process	10	1.94553	0.253746	ENSBTAG00000002129, ENSBTAG00000032132, ENSBTAG00000014541, ENSBTAG00000005734, ENSBTAG00000002835, ENSBTAG00000022360, ENSBTAG00000004322, ENSBTAG00000008313, ENSBTAG00000009012, ENSBTAG00000003835	198	175	4989	1.43983	1	0.998999	99.1304
GOTERM_BP_FAT	GO:0045935~positive regulation of nucleobase, nucleoside, nucleotide and nucleic acid metabolic process	9	1.75097	0.262462	ENSBTAG00000002129, ENSBTAG00000032132, ENSBTAG00000014541, ENSBTAG00000005734, ENSBTAG00000002835, ENSBTAG00000022360, ENSBTAG00000004322, ENSBTAG00000008313, ENSBTAG00000003835	198	154	4989	1.47255	1	0.99901	99.2812
GOTERM_BP_FAT	GO:0051254~positive regulation of RNA metabolic process	7	1.36187	0.273816	ENSBTAG00000032132, ENSBTAG00000005734, ENSBTAG00000002835, ENSBTAG00000022360, ENSBTAG00000004322, ENSBTAG00000008313, ENSBTAG00000003835	198	111	4989	1.589	1	0.998979	99.4411
GOTERM_BP_FAT	GO:0045893~positive regulation of transcription, DNA-dependent	7	1.36187	0.273816	ENSBTAG00000032132, ENSBTAG00000005734, ENSBTAG00000002835, ENSBTAG00000022360, ENSBTAG00000004322, ENSBTAG00000008313, ENSBTAG00000003835	198	111	4989	1.589	1	0.998979	99.4411
GOTERM_BP_FAT	GO:0045944~positive regulation of transcription from RNA polymerase II promoter	6	1.16732	0.282135	ENSBTAG00000032132, ENSBTAG00000005734, ENSBTAG00000002835, ENSBTAG00000022360, ENSBTAG00000004322, ENSBTAG00000003835	198	90	4989	1.6798	1	0.999099	99.5363
GOTERM_BP_FAT	GO:0045941~positive regulation of transcription	8	1.55642	0.302888	ENSBTAG00000002129, ENSBTAG00000032132, ENSBTAG00000005734, ENSBTAG00000002835, ENSBTAG00000022360, ENSBTAG00000004322, ENSBTAG00000008313, ENSBTAG00000003835	198	138	4989	1.46069	1	0.999449	99.7118
GOTERM_BP_FAT	GO:0010604~positive regulation of macromolecule metabolic process	11	2.14008	0.309291	ENSBTAG00000002129, ENSBTAG00000032132, ENSBTAG00000014541, ENSBTAG00000005734, ENSBTAG00000002835, ENSBTAG00000022360, ENSBTAG00000004322, ENSBTAG00000011563, ENSBTAG00000008313, ENSBTAG00000003901, ENSBTAG00000003835	198	209	4989	1.32616	1	0.999415	99.7518
GOTERM_BP_FAT	GO:0010557~positive regulation of macromolecule biosynthetic process	9	1.75097	0.344711	ENSBTAG00000002129, ENSBTAG00000032132, ENSBTAG00000014541, ENSBTAG00000005734, ENSBTAG00000002835, ENSBTAG00000022360, ENSBTAG00000004322, ENSBTAG00000008313, ENSBTAG00000003835	198	168	4989	1.34984	1	0.999613	99.8943
GOTERM_MF_FAT	GO:0030528~transcription regulator activity	18	3.50195	0.361724	ENSBTAG00000002129, ENSBTAG00000022360, ENSBTAG00000005734, ENSBTAG00000008182, ENSBTAG00000040585, ENSBTAG00000003901, ENSBTAG00000002333, ENSBTAG00000006679, ENSBTAG00000008545, ENSBTAG00000020713, ENSBTAG00000032132, ENSBTAG00000007917, ENSBTAG00000002835, ENSBTAG00000017661, ENSBTAG00000004322, ENSBTAG00000008313, ENSBTAG00000043953, ENSBTAG00000008943	196	404	5145	1.16955	1	0.979087	99.7997
GOTERM_MF_FAT	GO:0046983~protein dimerization activity	7	1.36187	0.538894	ENSBTAG00000020713, ENSBTAG00000014541, ENSBTAG00000012567, ENSBTAG00000022360, ENSBTAG00000008182, ENSBTAG00000004322, ENSBTAG00000008545	196	155	5145	1.18548	1	0.998055	99.9978
GOTERM_BP_FAT	GO:0006355~regulation of transcription, DNA-dependent	19	3.6965	0.577266	ENSBTAG00000002129, ENSBTAG00000022360, ENSBTAG00000005734, ENSBTAG00000008182, ENSBTAG00000040585, ENSBTAG00000003901, ENSBTAG00000002333, ENSBTAG00000008545, ENSBTAG00000005017, ENSBTAG00000020713, ENSBTAG00000032132, ENSBTAG00000007917, ENSBTAG00000002835, ENSBTAG00000017661, ENSBTAG00000004322, ENSBTAG00000008313, ENSBTAG00000043953, ENSBTAG00000008943, ENSBTAG00000003835	198	466	4989	1.02734	1	0.999996	99.9999
GOTERM_BP_FAT	GO:0051252~regulation of RNA metabolic process	19	3.6965	0.622403	ENSBTAG00000002129, ENSBTAG00000022360, ENSBTAG00000005734, ENSBTAG00000008182, ENSBTAG00000040585, ENSBTAG00000003901, ENSBTAG00000002333, ENSBTAG00000008545, ENSBTAG00000005017, ENSBTAG00000020713, ENSBTAG00000032132, ENSBTAG00000007917, ENSBTAG00000002835, ENSBTAG00000017661, ENSBTAG00000004322, ENSBTAG00000008313, ENSBTAG00000043953, ENSBTAG00000008943, ENSBTAG00000003835	198	478	4989	1.00155	1	0.999999	100
GOTERM_BP_FAT	GO:0006357~regulation of transcription from RNA polymerase II promoter	7	1.36187	0.641283	ENSBTAG00000032132, ENSBTAG00000005734, ENSBTAG00000002835, ENSBTAG00000022360, ENSBTAG00000004322, ENSBTAG00000002333, ENSBTAG00000003835	198	165	4989	1.06896	1	0.999999	100
GOTERM_MF_FAT	GO:0003677~DNA binding	20	3.89105	0.88714	ENSBTAG00000039657, ENSBTAG00000002129, ENSBTAG00000022360, ENSBTAG00000005734, ENSBTAG00000008182, ENSBTAG00000011677, ENSBTAG00000040585, ENSBTAG00000012498, ENSBTAG00000003901, ENSBTAG00000002333, ENSBTAG00000008545, ENSBTAG00000020713, ENSBTAG00000012567, ENSBTAG00000007917, ENSBTAG00000002835, ENSBTAG00000017661, ENSBTAG00000004322, ENSBTAG00000008313, ENSBTAG00000043953, ENSBTAG00000008943	196	630	5145	0.833333	1	1	100
SP_PIR_KEYWORDS	dna-binding	7	1.36187	0.95768	ENSBTAG00000039657, ENSBTAG00000012567, ENSBTAG00000017661, ENSBTAG00000008182, ENSBTAG00000011677, ENSBTAG00000004322, ENSBTAG00000008545	182	294	5056	0.661434	1	1	100
GOTERM_BP_FAT	GO:0045449~regulation of transcription	21	4.0856	0.966171	ENSBTAG00000002129, ENSBTAG00000022360, ENSBTAG00000005734, ENSBTAG00000008182, ENSBTAG00000040585, ENSBTAG00000003901, ENSBTAG00000012498, ENSBTAG00000002333, ENSBTAG00000006679, ENSBTAG00000008545, ENSBTAG00000005017, ENSBTAG00000020713, ENSBTAG00000032132, ENSBTAG00000007917, ENSBTAG00000002835, ENSBTAG00000017661, ENSBTAG00000004322, ENSBTAG00000008313, ENSBTAG00000043953, ENSBTAG00000008943,…	198	709	4989	0.746314	1	1	100
GOTERM_CC_FAT	GO:0044451~nucleoplasm part	4	0.77821	0.990749	ENSBTAG00000032132, ENSBTAG00000005734, ENSBTAG00000002835, ENSBTAG00000004322	159	199	3834	0.484688	1	1	100
GOTERM_BP_FAT	GO:0006350~transcription	8	1.55642	0.99549	ENSBTAG00000032132, ENSBTAG00000002835, ENSBTAG00000017661, ENSBTAG00000006035, ENSBTAG00000019612, ENSBTAG00000002333, ENSBTAG00000008943, ENSBTAG00000008545	198	386	4989	0.522217	1	1	100
SP_PIR_KEYWORDS	transcription regulation	5	0.972763	0.997291	ENSBTAG00000002835, ENSBTAG00000017661, ENSBTAG00000002333, ENSBTAG00000008943, ENSBTAG00000008545	182	317	5056	0.438174	1	1	100
GOTERM_CC_FAT	GO:0005654~nucleoplasm	4	0.77821	0.997543	ENSBTAG00000032132, ENSBTAG00000005734, ENSBTAG00000002835, ENSBTAG00000004322	159	236	3834	0.408698	1	1	100
GOTERM_CC_FAT	GO:0031981~nuclear lumen	7	1.36187	0.999012	ENSBTAG00000032132, ENSBTAG00000005734, ENSBTAG00000002835, ENSBTAG00000004322, ENSBTAG00000017574, ENSBTAG00000019612, ENSBTAG00000008545	159	380	3834	0.444191	1	1	100
SP_PIR_KEYWORDS	Transcription	5	0.972763	0.999494	ENSBTAG00000002835, ENSBTAG00000017661, ENSBTAG00000002333, ENSBTAG00000008943, ENSBTAG00000008545	182	372	5056	0.37339	1	1	100
GOTERM_CC_FAT	GO:0070013~intracellular organelle lumen	8	1.55642	0.999968	ENSBTAG00000032132, ENSBTAG00000005734, ENSBTAG00000002835, ENSBTAG00000004322, ENSBTAG00000017574, ENSBTAG00000019612, ENSBTAG00000011927, ENSBTAG00000008545	159	517	3834	0.373125	1	1	100
GOTERM_CC_FAT	GO:0043233~organelle lumen	8	1.55642	0.999968	ENSBTAG00000032132, ENSBTAG00000005734, ENSBTAG00000002835, ENSBTAG00000004322, ENSBTAG00000017574, ENSBTAG00000019612, ENSBTAG00000011927, ENSBTAG00000008545	159	517	3834	0.373125	1	1	100
GOTERM_CC_FAT	GO:0031974~membrane-enclosed lumen	8	1.55642	0.999983	ENSBTAG00000032132, ENSBTAG00000005734, ENSBTAG00000002835, ENSBTAG00000004322, ENSBTAG00000017574, ENSBTAG00000019612, ENSBTAG00000011927, ENSBTAG00000008545	159	535	3834	0.360571	1	1	100
SP_PIR_KEYWORDS	nucleus	15	2.91829	0.999999	ENSBTAG00000019275, ENSBTAG00000039657, ENSBTAG00000011677, ENSBTAG00000008182, ENSBTAG00000002333, ENSBTAG00000008545, ENSBTAG00000034069, ENSBTAG00000039682, ENSBTAG00000003454, ENSBTAG00000012567, ENSBTAG00000002835, ENSBTAG00000017661, ENSBTAG00000004322, ENSBTAG00000008943, ENSBTAG00000008091	182	1015	5056	0.410545	1	1	100
Annotation Cluster 26; Enrichment Score: 0.3
Category	Term	Count	%	PValue	Genes	List Total	Pop Hits	Pop Total	Fold Enrichment	Bonferroni	Benjamini	FDR
GOTERM_MF_FAT	GO:0004725~protein tyrosine phosphatase activity	5	0.972763	0.1541	ENSBTAG00000040559, ENSBTAG00000024492, ENSBTAG00000015311, ENSBTAG00000030749, ENSBTAG00000015296	196	55	5145	2.38636	1	0.828276	90.1326
GOTERM_MF_FAT	GO:0004721~phosphoprotein phosphatase activity	5	0.972763	0.403558	ENSBTAG00000040559, ENSBTAG00000024492, ENSBTAG00000015311, ENSBTAG00000030749, ENSBTAG00000015296	196	85	5145	1.54412	1	0.987124	99.9216
GOTERM_BP_FAT	GO:0006470~protein amino acid dephosphorylation	4	0.77821	0.445835	ENSBTAG00000040559, ENSBTAG00000024492, ENSBTAG00000015311, ENSBTAG00000015296	198	62	4989	1.62561	1	0.999951	99.993
GOTERM_BP_FAT	GO:0016311~dephosphorylation	4	0.77821	0.601058	ENSBTAG00000040559, ENSBTAG00000024492, ENSBTAG00000015311, ENSBTAG00000015296	198	78	4989	1.29215	1	0.999998	100
GOTERM_MF_FAT	GO:0016791~phosphatase activity	5	0.972763	0.744419	ENSBTAG00000040559, ENSBTAG00000024492, ENSBTAG00000015311, ENSBTAG00000030749, ENSBTAG00000015296	196	132	5145	0.994318	1	0.99996	100
GOTERM_BP_FAT	GO:0006796~phosphate metabolic process	7	1.36187	0.999832	ENSBTAG00000004885, ENSBTAG00000040559, ENSBTAG00000024492, ENSBTAG00000007173, ENSBTAG00000015311, ENSBTAG00000005092, ENSBTAG00000015296	198	455	4989	0.387646	1	1	100
GOTERM_BP_FAT	GO:0006793~phosphorus metabolic process	7	1.36187	0.999832	ENSBTAG00000004885, ENSBTAG00000040559, ENSBTAG00000024492, ENSBTAG00000007173, ENSBTAG00000015311, ENSBTAG00000005092, ENSBTAG00000015296	198	455	4989	0.387646	1	1	100
Annotation Cluster 27; Enrichment Score: 0.1
Category	Term	Count	%	PValue	Genes	List Total	Pop Hits	Pop Total	Fold Enrichment	Bonferroni	Benjamini	FDR
GOTERM_CC_FAT	GO:0031410~cytoplasmic vesicle	8	1.55642	0.648466	ENSBTAG00000009836, ENSBTAG00000001662, ENSBTAG00000001801, ENSBTAG00000013290, ENSBTAG00000012387, ENSBTAG00000005574, ENSBTAG00000010244, ENSBTAG00000017220	159	185	3834	1.04273	1	0.998956	99.9998
GOTERM_CC_FAT	GO:0031982~vesicle	8	1.55642	0.68695	ENSBTAG00000009836, ENSBTAG00000001662, ENSBTAG00000001801, ENSBTAG00000013290, ENSBTAG00000012387, ENSBTAG00000005574, ENSBTAG00000010244, ENSBTAG00000017220	159	192	3834	1.00472	1	0.999377	100
GOTERM_CC_FAT	GO:0016023~cytoplasmic membrane-bounded vesicle	6	1.16732	0.754933	ENSBTAG00000009836, ENSBTAG00000001662, ENSBTAG00000001801, ENSBTAG00000005574, ENSBTAG00000010244, ENSBTAG00000017220	159	151	3834	0.958141	1	0.999826	100
GOTERM_CC_FAT	GO:0031988~membrane-bounded vesicle	6	1.16732	0.779854	ENSBTAG00000009836, ENSBTAG00000001662, ENSBTAG00000001801, ENSBTAG00000005574, ENSBTAG00000010244, ENSBTAG00000017220	159	156	3834	0.927431	1	0.999881	100
Annotation Cluster 28; Enrichment Score: 0.1
Category	Term	Count	%	PValue	Genes	List Total	Pop Hits	Pop Total	Fold Enrichment	Bonferroni	Benjamini	FDR
GOTERM_BP_FAT	GO:0009165~nucleotide biosynthetic process	4	0.77821	0.791454	ENSBTAG00000000795, ENSBTAG00000011936, ENSBTAG00000000945, ENSBTAG00000004674	198	105	4989	0.959885	1	1	100
GOTERM_BP_FAT	GO:0034404~nucleobase, nucleoside and nucleotide biosynthetic process	4	0.77821	0.821722	ENSBTAG00000000795, ENSBTAG00000011936, ENSBTAG00000000945, ENSBTAG00000004674	198	111	4989	0.907999	1	1	100
GOTERM_BP_FAT	GO:0034654~nucleobase, nucleoside, nucleotide and nucleic acid biosynthetic process	4	0.77821	0.821722	ENSBTAG00000000795, ENSBTAG00000011936, ENSBTAG00000000945, ENSBTAG00000004674	198	111	4989	0.907999	1	1	100
GOTERM_BP_FAT	GO:0044271~nitrogen compound biosynthetic process	4	0.77821	0.970749	ENSBTAG00000000795, ENSBTAG00000011936, ENSBTAG00000000945, ENSBTAG00000004674	198	173	4989	0.582589	1	1	100
Annotation Cluster 29; Enrichment Score: 0.04
Category	Term	Count	%	PValue	Genes	List Total	Pop Hits	Pop Total	Fold Enrichment	Bonferroni	Benjamini	FDR
GOTERM_BP_FAT	GO:0034622~cellular macromolecular complex assembly	4	0.77821	0.835409	ENSBTAG00000039657, ENSBTAG00000002835, ENSBTAG00000011677, ENSBTAG00000019612	198	114	4989	0.884104	1	1	100
GOTERM_BP_FAT	GO:0034621~cellular macromolecular complex subunit organization	4	0.77821	0.874709	ENSBTAG00000039657, ENSBTAG00000002835, ENSBTAG00000011677, ENSBTAG00000019612	198	124	4989	0.812805	1	1	100
GOTERM_BP_FAT	GO:0043933~macromolecular complex subunit organization	5	0.972763	0.959267	ENSBTAG00000039657, ENSBTAG00000012855, ENSBTAG00000002835, ENSBTAG00000011677, ENSBTAG00000019612	198	199	4989	0.63309	1	1	100
GOTERM_BP_FAT	GO:0065003~macromolecular complex assembly	4	0.77821	0.98124	ENSBTAG00000039657, ENSBTAG00000002835, ENSBTAG00000011677, ENSBTAG00000019612	198	187	4989	0.538973	1	1	100
Annotation Cluster 30; Enrichment Score: 0.01
Category	Term	Count	%	PValue	Genes	List Total	Pop Hits	Pop Total	Fold Enrichment	Bonferroni	Benjamini	FDR
GOTERM_MF_FAT	GO:0005525~GTP binding	5	0.972763	0.958818	ENSBTAG00000001662, ENSBTAG00000012774, ENSBTAG00000022461, ENSBTAG00000020520, ENSBTAG00000015727	196	207	5145	0.634058	1	1	100
GOTERM_MF_FAT	GO:0032561~guanyl ribonucleotide binding	5	0.972763	0.960992	ENSBTAG00000001662, ENSBTAG00000012774, ENSBTAG00000022461, ENSBTAG00000020520, ENSBTAG00000015727	196	209	5145	0.62799	1	1	100
GOTERM_MF_FAT	GO:0019001~guanyl nucleotide binding	5	0.972763	0.962038	ENSBTAG00000001662, ENSBTAG00000012774, ENSBTAG00000022461, ENSBTAG00000020520, ENSBTAG00000015727	196	210	5145	0.625	1	1	100
GOTERM_MF_FAT	GO:0032553~ribonucleotide binding	21	4.0856	0.999387	ENSBTAG00000013078, ENSBTAG00000012774, ENSBTAG00000000795, ENSBTAG00000003196, ENSBTAG00000037527, ENSBTAG00000039206, ENSBTAG00000006921, ENSBTAG00000011936, ENSBTAG00000014628, ENSBTAG00000000945, ENSBTAG00000015727, ENSBTAG00000004885, ENSBTAG00000003763, ENSBTAG00000039861, ENSBTAG00000011278, ENSBTAG00000001662, ENSBTAG00000015527, ENSBTAG00000007173, ENSBTAG00000005092, ENSBTAG00000020520,…	196	938	5145	0.587687	1	1	100
GOTERM_MF_FAT	GO:0032555~purine ribonucleotide binding	21	4.0856	0.999387	ENSBTAG00000013078, ENSBTAG00000012774, ENSBTAG00000000795, ENSBTAG00000003196, ENSBTAG00000037527, ENSBTAG00000039206, ENSBTAG00000006921, ENSBTAG00000011936, ENSBTAG00000014628, ENSBTAG00000000945, ENSBTAG00000015727, ENSBTAG00000004885, ENSBTAG00000003763, ENSBTAG00000039861, ENSBTAG00000011278, ENSBTAG00000001662, ENSBTAG00000015527, ENSBTAG00000007173, ENSBTAG00000005092, ENSBTAG00000020520,…	196	938	5145	0.587687	1	1	100
Annotation Cluster 31; Enrichment Score: 0.0008
Category	Term	Count	%	PValue	Genes	List Total	Pop Hits	Pop Total	Fold Enrichment	Bonferroni	Benjamini	FDR
GOTERM_MF_FAT	GO:0030554~adenyl nucleotide binding	19	3.6965	0.995362	ENSBTAG00000013078, ENSBTAG00000000795, ENSBTAG00000007111, ENSBTAG00000037527, ENSBTAG00000003196, ENSBTAG00000039206, ENSBTAG00000006921, ENSBTAG00000011936, ENSBTAG00000014628, ENSBTAG00000016761, ENSBTAG00000000945, ENSBTAG00000004885, ENSBTAG00000003763, ENSBTAG00000039861, ENSBTAG00000011278, ENSBTAG00000015527, ENSBTAG00000019321, ENSBTAG00000007173, ENSBTAG00000005092	196	781	5145	0.638604	1	1	100
GOTERM_MF_FAT	GO:0001883~purine nucleoside binding	19	3.6965	0.995826	ENSBTAG00000013078, ENSBTAG00000000795, ENSBTAG00000007111, ENSBTAG00000037527, ENSBTAG00000003196, ENSBTAG00000039206, ENSBTAG00000006921, ENSBTAG00000011936, ENSBTAG00000014628, ENSBTAG00000016761, ENSBTAG00000000945, ENSBTAG00000004885, ENSBTAG00000003763, ENSBTAG00000039861, ENSBTAG00000011278, ENSBTAG00000015527, ENSBTAG00000019321, ENSBTAG00000007173, ENSBTAG00000005092	196	786	5145	0.634542	1	1	100
GOTERM_MF_FAT	GO:0001882~nucleoside binding	19	3.6965	0.996246	ENSBTAG00000013078, ENSBTAG00000000795, ENSBTAG00000007111, ENSBTAG00000037527, ENSBTAG00000003196, ENSBTAG00000039206, ENSBTAG00000006921, ENSBTAG00000011936, ENSBTAG00000014628, ENSBTAG00000016761, ENSBTAG00000000945, ENSBTAG00000004885, ENSBTAG00000003763, ENSBTAG00000039861, ENSBTAG00000011278, ENSBTAG00000015527, ENSBTAG00000019321, ENSBTAG00000007173, ENSBTAG00000005092	196	791	5145	0.630531	1	1	100
GOTERM_MF_FAT	GO:0017076~purine nucleotide binding	24	4.66926	0.99796	ENSBTAG00000013078, ENSBTAG00000012774, ENSBTAG00000000795, ENSBTAG00000007111, ENSBTAG00000003196, ENSBTAG00000037527, ENSBTAG00000039206, ENSBTAG00000006921, ENSBTAG00000011936, ENSBTAG00000014628, ENSBTAG00000016761, ENSBTAG00000000945, ENSBTAG00000015727, ENSBTAG00000004885, ENSBTAG00000003763, ENSBTAG00000039861, ENSBTAG00000011278, ENSBTAG00000001662, ENSBTAG00000015527, ENSBTAG00000019321,…	196	981	5145	0.642202	1	1	100
GOTERM_MF_FAT	GO:0005524~ATP binding	16	3.11284	0.998511	ENSBTAG00000013078, ENSBTAG00000000795, ENSBTAG00000037527, ENSBTAG00000003196, ENSBTAG00000039206, ENSBTAG00000006921, ENSBTAG00000011936, ENSBTAG00000014628, ENSBTAG00000000945, ENSBTAG00000004885, ENSBTAG00000003763, ENSBTAG00000039861, ENSBTAG00000011278, ENSBTAG00000015527, ENSBTAG00000007173, ENSBTAG00000005092	196	732	5145	0.57377	1	1	100
GOTERM_MF_FAT	GO:0032559~adenyl ribonucleotide binding	16	3.11284	0.99874	ENSBTAG00000013078, ENSBTAG00000000795, ENSBTAG00000037527, ENSBTAG00000003196, ENSBTAG00000039206, ENSBTAG00000006921, ENSBTAG00000011936, ENSBTAG00000014628, ENSBTAG00000000945, ENSBTAG00000004885, ENSBTAG00000003763, ENSBTAG00000039861, ENSBTAG00000011278, ENSBTAG00000015527, ENSBTAG00000007173, ENSBTAG00000005092	196	739	5145	0.568336	1	1	100
GOTERM_MF_FAT	GO:0032553~ribonucleotide binding	21	4.0856	0.999387	ENSBTAG00000013078, ENSBTAG00000012774, ENSBTAG00000000795, ENSBTAG00000003196, ENSBTAG00000037527, ENSBTAG00000039206, ENSBTAG00000006921, ENSBTAG00000011936, ENSBTAG00000014628, ENSBTAG00000000945, ENSBTAG00000015727, ENSBTAG00000004885, ENSBTAG00000003763, ENSBTAG00000039861, ENSBTAG00000011278, ENSBTAG00000001662, ENSBTAG00000015527, ENSBTAG00000007173, ENSBTAG00000005092, ENSBTAG00000020520,…	196	938	5145	0.587687	1	1	100
GOTERM_MF_FAT	GO:0032555~purine ribonucleotide binding	21	4.0856	0.999387	ENSBTAG00000013078, ENSBTAG00000012774, ENSBTAG00000000795, ENSBTAG00000003196, ENSBTAG00000037527, ENSBTAG00000039206, ENSBTAG00000006921, ENSBTAG00000011936, ENSBTAG00000014628, ENSBTAG00000000945, ENSBTAG00000015727, ENSBTAG00000004885, ENSBTAG00000003763, ENSBTAG00000039861, ENSBTAG00000011278, ENSBTAG00000001662, ENSBTAG00000015527, ENSBTAG00000007173, ENSBTAG00000005092, ENSBTAG00000020520,…	196	938	5145	0.587687	1	1	100
GOTERM_MF_FAT	GO:0000166~nucleotide binding	26	5.05837	0.99984	ENSBTAG00000013078, ENSBTAG00000000795, ENSBTAG00000007111, ENSBTAG00000003196, ENSBTAG00000037527, ENSBTAG00000006921, ENSBTAG00000011936, ENSBTAG00000016761, ENSBTAG00000000945, ENSBTAG00000015727, ENSBTAG00000003763, ENSBTAG00000039861, ENSBTAG00000019321, ENSBTAG00000020520, ENSBTAG00000022461, ENSBTAG00000011037, ENSBTAG00000033727, ENSBTAG00000012774, ENSBTAG00000039206, ENSBTAG00000014628,…	196	1159	5145	0.58887	1	1	100
SP_PIR_KEYWORDS	nucleotide-binding	7	1.36187	0.999995	ENSBTAG00000013078, ENSBTAG00000011278, ENSBTAG00000015527, ENSBTAG00000012774, ENSBTAG00000000795, ENSBTAG00000022461, ENSBTAG00000020520	182	611	5056	0.318268	1	1	100
