# Supplementary material for: Characterisation of the Whole Blood mRNA Transcriptome in Holstein-Friesian and Jersey Calves in Response to Gradual Weaning
Source: PLoS One. 2016 Aug 1;11(8):e0159707. doi: 10.1371/journal.pone.0159707 (PMC4968839; doi:10.1371/journal.pone.0159707)
Supplement: S6 Table — Enriched functional annotation clusters (group enrichment score > 1.3) are highlighted in yellow. Functional annotations within the clusters which had a benjamini hochberg false discovery rate < 0.1 are highlighted in blue. (XLSX) [file pone.0159707.s006.xlsx]

## Sheet: Supplementary Table 5.6
S6 Table. Functional annotation clusters identified among the DEG between Holstein-Friesian and Jersey calves at day 1, relative to weaning
Annotation Cluster 1; Enrichment Score: 6.1
Category	Term	Count	%	PValue	Genes	List Total	Pop Hits	Pop Total	Fold Enrichment	Bonferroni	Benjamini	FDR
UP_SEQ_FEATURE	disulfide bond	36	7.94702	1.166e-11	ENSBTAG00000019712, ENSBTAG00000004547, ENSBTAG00000021302, ENSBTAG00000008542, ENSBTAG00000017846, ENSBTAG00000000616, ENSBTAG00000008291, ENSBTAG00000002006, ENSBTAG00000000585, ENSBTAG00000021565, ENSBTAG00000017328, ENSBTAG00000020990, ENSBTAG00000006716, ENSBTAG00000002885, ENSBTAG00000002699, ENSBTAG00000025250, ENSBTAG00000001580, ENSBTAG00000039813, ENSBTAG00000004869, ENSBTAG00000011961,…	117	348	4012	3.5473	5.04878e-09	5.04878e-09	1.6451e-08
UP_SEQ_FEATURE	signal peptide	40	8.83002	2.1717e-11	ENSBTAG00000021302, ENSBTAG00000008542, ENSBTAG00000017846, ENSBTAG00000008291, ENSBTAG00000002006, ENSBTAG00000001793, ENSBTAG00000000585, ENSBTAG00000021565, ENSBTAG00000017328, ENSBTAG00000007421, ENSBTAG00000006716, ENSBTAG00000002699, ENSBTAG00000025250, ENSBTAG00000002069, ENSBTAG00000001580, ENSBTAG00000039813, ENSBTAG00000020116, ENSBTAG00000004869, ENSBTAG00000009812, ENSBTAG00000005973,…	117	436	4012	3.14593	9.40344e-09	4.70172e-09	3.06402e-08
SP_PIR_KEYWORDS	signal	40	8.83002	2.93116e-10	ENSBTAG00000021302, ENSBTAG00000008542, ENSBTAG00000017846, ENSBTAG00000008291, ENSBTAG00000002006, ENSBTAG00000001793, ENSBTAG00000000585, ENSBTAG00000021565, ENSBTAG00000017328, ENSBTAG00000007421, ENSBTAG00000006716, ENSBTAG00000002699, ENSBTAG00000025250, ENSBTAG00000002069, ENSBTAG00000001580, ENSBTAG00000039813, ENSBTAG00000020116, ENSBTAG00000004869, ENSBTAG00000009812, ENSBTAG00000005973,…	155	436	5056	2.9926	6.68305e-08	6.68305e-08	3.75263e-07
SP_PIR_KEYWORDS	disulfide bond	36	7.94702	7.11034e-10	ENSBTAG00000019712, ENSBTAG00000004547, ENSBTAG00000021302, ENSBTAG00000008542, ENSBTAG00000017846, ENSBTAG00000000616, ENSBTAG00000008291, ENSBTAG00000002006, ENSBTAG00000000585, ENSBTAG00000021565, ENSBTAG00000017328, ENSBTAG00000020990, ENSBTAG00000006716, ENSBTAG00000002885, ENSBTAG00000002699, ENSBTAG00000025250, ENSBTAG00000001580, ENSBTAG00000039813, ENSBTAG00000004869, ENSBTAG00000011961,…	155	371	5056	3.16522	1.62116e-07	8.10579e-08	9.10304e-07
GOTERM_BP_FAT	GO:0006955~immune response	24	5.29801	1.95201e-08	ENSBTAG00000002069, ENSBTAG00000004547, ENSBTAG00000031725, ENSBTAG00000020116, ENSBTAG00000011932, ENSBTAG00000011961, ENSBTAG00000009812, ENSBTAG00000033748, ENSBTAG00000019386, ENSBTAG00000014529, ENSBTAG00000014546, ENSBTAG00000010155, ENSBTAG00000008291, ENSBTAG00000012208, ENSBTAG00000002006, ENSBTAG00000007191, ENSBTAG00000015565, ENSBTAG00000009836, ENSBTAG00000003289, ENSBTAG00000001725,…	162	187	4989	3.95247	2.36971e-05	2.36971e-05	3.16031e-05
GOTERM_CC_FAT	GO:0005576~extracellular region	33	7.28477	2.94819e-08	ENSBTAG00000019712, ENSBTAG00000004547, ENSBTAG00000021302, ENSBTAG00000038652, ENSBTAG00000008542, ENSBTAG00000002006, ENSBTAG00000001793, ENSBTAG00000021565, ENSBTAG00000017328, ENSBTAG00000039524, ENSBTAG00000010082, ENSBTAG00000001049, ENSBTAG00000002885, ENSBTAG00000002699, ENSBTAG00000025250, ENSBTAG00000003806, ENSBTAG00000008869, ENSBTAG00000011961, ENSBTAG00000009812, ENSBTAG00000020178,…	149	292	3834	2.90802	5.63103e-06	5.63103e-06	3.66738e-05
SP_PIR_KEYWORDS	glycoprotein	41	9.05077	3.54101e-08	ENSBTAG00000004547, ENSBTAG00000019712, ENSBTAG00000021302, ENSBTAG00000014861, ENSBTAG00000008542, ENSBTAG00000017846, ENSBTAG00000000616, ENSBTAG00000008291, ENSBTAG00000002006, ENSBTAG00000001793, ENSBTAG00000000585, ENSBTAG00000003454, ENSBTAG00000020990, ENSBTAG00000007421, ENSBTAG00000006716, ENSBTAG00000002699, ENSBTAG00000002885, ENSBTAG00000039813, ENSBTAG00000004869, ENSBTAG00000010238,…	155	536	5056	2.49514	8.07347e-06	2.69116e-06	4.53339e-05
GOTERM_MF_FAT	GO:0030246~carbohydrate binding	14	3.09051	2.25942e-07	ENSBTAG00000004547, ENSBTAG00000011932, ENSBTAG00000011961, ENSBTAG00000009812, ENSBTAG00000010155, ENSBTAG00000014546, ENSBTAG00000007223, ENSBTAG00000002006, ENSBTAG00000012855, ENSBTAG00000030424, ENSBTAG00000019612, ENSBTAG00000007312, ENSBTAG00000009012, ENSBTAG00000003835	161	72	5145	6.21377	8.15616e-05	8.15616e-05	0.000310436
GOTERM_CC_FAT	GO:0005615~extracellular space	18	3.97351	2.48689e-07	ENSBTAG00000011961, ENSBTAG00000009812, ENSBTAG00000008542, ENSBTAG00000010155, ENSBTAG00000002006, ENSBTAG00000007191, ENSBTAG00000021565, ENSBTAG00000012855, ENSBTAG00000014541, ENSBTAG00000004982, ENSBTAG00000002699, ENSBTAG00000001725, ENSBTAG00000002885, ENSBTAG00000019612, ENSBTAG00000025250, ENSBTAG00000010303, ENSBTAG00000003806, ENSBTAG00000003835	149	103	3834	4.49677	4.74984e-05	2.37495e-05	0.000309354
GOTERM_MF_FAT	GO:0030247~polysaccharide binding	10	2.20751	3.3001e-07	ENSBTAG00000012855, ENSBTAG00000011932, ENSBTAG00000011961, ENSBTAG00000009812, ENSBTAG00000019612, ENSBTAG00000014546, ENSBTAG00000010155, ENSBTAG00000009012, ENSBTAG00000003835, ENSBTAG00000002006	161	32	5145	9.98641	0.000119127	5.95651e-05	0.000453423
GOTERM_MF_FAT	GO:0001871~pattern binding	10	2.20751	3.3001e-07	ENSBTAG00000012855, ENSBTAG00000011932, ENSBTAG00000011961, ENSBTAG00000009812, ENSBTAG00000019612, ENSBTAG00000014546, ENSBTAG00000010155, ENSBTAG00000009012, ENSBTAG00000003835, ENSBTAG00000002006	161	32	5145	9.98641	0.000119127	5.95651e-05	0.000453423
UP_SEQ_FEATURE	glycosylation site:N-linked (GlcNAc...)	35	7.72627	5.5914e-07	ENSBTAG00000019712, ENSBTAG00000004547, ENSBTAG00000014861, ENSBTAG00000008542, ENSBTAG00000017846, ENSBTAG00000000616, ENSBTAG00000008291, ENSBTAG00000002006, ENSBTAG00000001793, ENSBTAG00000000585, ENSBTAG00000020990, ENSBTAG00000007421, ENSBTAG00000006716, ENSBTAG00000002885, ENSBTAG00000002699, ENSBTAG00000039813, ENSBTAG00000004869, ENSBTAG00000010238, ENSBTAG00000005973, ENSBTAG00000018164,…	117	494	4012	2.4295	0.000242078	8.06993e-05	0.000788882
GOTERM_CC_FAT	GO:0044421~extracellular region part	21	4.63576	3.1677e-06	ENSBTAG00000008869, ENSBTAG00000021302, ENSBTAG00000011961, ENSBTAG00000009812, ENSBTAG00000008542, ENSBTAG00000010155, ENSBTAG00000002006, ENSBTAG00000007191, ENSBTAG00000021565, ENSBTAG00000012855, ENSBTAG00000014541, ENSBTAG00000010082, ENSBTAG00000004982, ENSBTAG00000002699, ENSBTAG00000001725, ENSBTAG00000002885, ENSBTAG00000019612, ENSBTAG00000025250, ENSBTAG00000010303, ENSBTAG00000003806,…	149	164	3834	3.29489	0.000604849	0.000201657	0.00394037
SP_PIR_KEYWORDS	Secreted	20	4.41501	5.53995e-06	ENSBTAG00000004547, ENSBTAG00000021302, ENSBTAG00000011961, ENSBTAG00000009812, ENSBTAG00000008542, ENSBTAG00000020178, ENSBTAG00000010155, ENSBTAG00000001793, ENSBTAG00000007191, ENSBTAG00000017328, ENSBTAG00000021565, ENSBTAG00000009836, ENSBTAG00000014541, ENSBTAG00000004982, ENSBTAG00000001725, ENSBTAG00000019612, ENSBTAG00000025250, ENSBTAG00000007450, ENSBTAG00000009012, ENSBTAG00000003835	155	195	5056	3.34557	0.00126232	0.000315728	0.00709232
GOTERM_MF_FAT	GO:0008201~heparin binding	7	1.54525	1.59736e-05	ENSBTAG00000012855, ENSBTAG00000011961, ENSBTAG00000009812, ENSBTAG00000019612, ENSBTAG00000010155, ENSBTAG00000003835, ENSBTAG00000002006	161	19	5145	11.7735	0.00574992	0.00144059	0.021945
GOTERM_MF_FAT	GO:0005125~cytokine activity	8	1.766	7.96048e-05	ENSBTAG00000007191, ENSBTAG00000003289, ENSBTAG00000001725, ENSBTAG00000011961, ENSBTAG00000009812, ENSBTAG00000025250, ENSBTAG00000010155, ENSBTAG00000003835	161	35	5145	7.30435	0.0283294	0.00573121	0.109319
GOTERM_MF_FAT	GO:0005539~glycosaminoglycan binding	7	1.54525	0.00014172	ENSBTAG00000012855, ENSBTAG00000011961, ENSBTAG00000009812, ENSBTAG00000019612, ENSBTAG00000010155, ENSBTAG00000003835, ENSBTAG00000002006	161	27	5145	8.28502	0.0498776	0.00849116	0.194543
SP_PIR_KEYWORDS	heparin-binding	5	1.10375	0.000150672	ENSBTAG00000012855, ENSBTAG00000011961, ENSBTAG00000009812, ENSBTAG00000010155, ENSBTAG00000002006	155	10	5056	16.3097	0.0337724	0.00570962	0.192727
SP_PIR_KEYWORDS	cytokine	7	1.54525	0.000192502	ENSBTAG00000007191, ENSBTAG00000001725, ENSBTAG00000011961, ENSBTAG00000009812, ENSBTAG00000025250, ENSBTAG00000010155, ENSBTAG00000003835	155	29	5056	7.87364	0.0429452	0.00547181	0.246172
UP_SEQ_FEATURE	topological domain:Extracellular	20	4.41501	0.000360659	ENSBTAG00000013245, ENSBTAG00000004547, ENSBTAG00000019712, ENSBTAG00000014861, ENSBTAG00000004869, ENSBTAG00000010238, ENSBTAG00000018164, ENSBTAG00000014546, ENSBTAG00000017846, ENSBTAG00000000616, ENSBTAG00000008291, ENSBTAG00000020990, ENSBTAG00000008483, ENSBTAG00000007421, ENSBTAG00000030424, ENSBTAG00000002699, ENSBTAG00000019486, ENSBTAG00000002885, ENSBTAG00000010303, ENSBTAG00000018432	117	281	4012	2.44061	0.144606	0.0382959	0.507649
UP_SEQ_FEATURE	topological domain:Cytoplasmic	24	5.29801	0.00380283	ENSBTAG00000013245, ENSBTAG00000001580, ENSBTAG00000004547, ENSBTAG00000019712, ENSBTAG00000014861, ENSBTAG00000009737, ENSBTAG00000004869, ENSBTAG00000010238, ENSBTAG00000018164, ENSBTAG00000014603, ENSBTAG00000014546, ENSBTAG00000017846, ENSBTAG00000000616, ENSBTAG00000008291, ENSBTAG00000020990, ENSBTAG00000008483, ENSBTAG00000007421, ENSBTAG00000030424, ENSBTAG00000002699, ENSBTAG00000019486,…	117	447	4012	1.84111	0.807905	0.240398	5.23367
GOTERM_BP_FAT	GO:0051050~positive regulation of transport	6	1.3245	0.0233682	ENSBTAG00000004588, ENSBTAG00000019612, ENSBTAG00000015837, ENSBTAG00000014546, ENSBTAG00000009012, ENSBTAG00000003835	162	51	4989	3.62309	1	0.779273	31.8066
Annotation Cluster 2; Enrichment Score: 4.6
Category	Term	Count	%	PValue	Genes	List Total	Pop Hits	Pop Total	Fold Enrichment	Bonferroni	Benjamini	FDR
GOTERM_BP_FAT	GO:0006955~immune response	24	5.29801	1.95201e-08	ENSBTAG00000002069, ENSBTAG00000004547, ENSBTAG00000031725, ENSBTAG00000020116, ENSBTAG00000011932, ENSBTAG00000011961, ENSBTAG00000009812, ENSBTAG00000033748, ENSBTAG00000019386, ENSBTAG00000014529, ENSBTAG00000014546, ENSBTAG00000010155, ENSBTAG00000008291, ENSBTAG00000012208, ENSBTAG00000002006, ENSBTAG00000007191, ENSBTAG00000015565, ENSBTAG00000009836, ENSBTAG00000003289, ENSBTAG00000001725,…	162	187	4989	3.95247	2.36971e-05	2.36971e-05	3.16031e-05
GOTERM_CC_FAT	GO:0005615~extracellular space	18	3.97351	2.48689e-07	ENSBTAG00000011961, ENSBTAG00000009812, ENSBTAG00000008542, ENSBTAG00000010155, ENSBTAG00000002006, ENSBTAG00000007191, ENSBTAG00000021565, ENSBTAG00000012855, ENSBTAG00000014541, ENSBTAG00000004982, ENSBTAG00000002699, ENSBTAG00000001725, ENSBTAG00000002885, ENSBTAG00000019612, ENSBTAG00000025250, ENSBTAG00000010303, ENSBTAG00000003806, ENSBTAG00000003835	149	103	3834	4.49677	4.74984e-05	2.37495e-05	0.000309354
GOTERM_MF_FAT	GO:0008009~chemokine activity	7	1.54525	6.52253e-07	ENSBTAG00000007191, ENSBTAG00000003289, ENSBTAG00000001725, ENSBTAG00000011961, ENSBTAG00000009812, ENSBTAG00000025250, ENSBTAG00000010155	161	12	5145	18.6413	0.000235436	7.84847e-05	0.000896172
GOTERM_MF_FAT	GO:0042379~chemokine receptor binding	7	1.54525	6.52253e-07	ENSBTAG00000007191, ENSBTAG00000003289, ENSBTAG00000001725, ENSBTAG00000011961, ENSBTAG00000009812, ENSBTAG00000025250, ENSBTAG00000010155	161	12	5145	18.6413	0.000235436	7.84847e-05	0.000896172
GOTERM_BP_FAT	GO:0042330~taxis	10	2.20751	2.80195e-06	ENSBTAG00000007191, ENSBTAG00000014541, ENSBTAG00000001061, ENSBTAG00000001725, ENSBTAG00000020872, ENSBTAG00000011961, ENSBTAG00000009812, ENSBTAG00000025250, ENSBTAG00000019741, ENSBTAG00000010155	162	39	4989	7.89649	0.00339579	0.00169934	0.00453627
GOTERM_BP_FAT	GO:0006935~chemotaxis	10	2.20751	2.80195e-06	ENSBTAG00000007191, ENSBTAG00000014541, ENSBTAG00000001061, ENSBTAG00000001725, ENSBTAG00000020872, ENSBTAG00000011961, ENSBTAG00000009812, ENSBTAG00000025250, ENSBTAG00000019741, ENSBTAG00000010155	162	39	4989	7.89649	0.00339579	0.00169934	0.00453627
GOTERM_CC_FAT	GO:0044421~extracellular region part	21	4.63576	3.1677e-06	ENSBTAG00000008869, ENSBTAG00000021302, ENSBTAG00000011961, ENSBTAG00000009812, ENSBTAG00000008542, ENSBTAG00000010155, ENSBTAG00000002006, ENSBTAG00000007191, ENSBTAG00000021565, ENSBTAG00000012855, ENSBTAG00000014541, ENSBTAG00000010082, ENSBTAG00000004982, ENSBTAG00000002699, ENSBTAG00000001725, ENSBTAG00000002885, ENSBTAG00000019612, ENSBTAG00000025250, ENSBTAG00000010303, ENSBTAG00000003806,…	149	164	3834	3.29489	0.000604849	0.000201657	0.00394037
SP_PIR_KEYWORDS	Secreted	20	4.41501	5.53995e-06	ENSBTAG00000004547, ENSBTAG00000021302, ENSBTAG00000011961, ENSBTAG00000009812, ENSBTAG00000008542, ENSBTAG00000020178, ENSBTAG00000010155, ENSBTAG00000001793, ENSBTAG00000007191, ENSBTAG00000017328, ENSBTAG00000021565, ENSBTAG00000009836, ENSBTAG00000014541, ENSBTAG00000004982, ENSBTAG00000001725, ENSBTAG00000019612, ENSBTAG00000025250, ENSBTAG00000007450, ENSBTAG00000009012, ENSBTAG00000003835	155	195	5056	3.34557	0.00126232	0.000315728	0.00709232
INTERPRO	IPR001811:Small chemokine, interleukin-8-like	6	1.3245	5.73011e-06	ENSBTAG00000007191, ENSBTAG00000001725, ENSBTAG00000011961, ENSBTAG00000009812, ENSBTAG00000025250, ENSBTAG00000010155	195	10	6326	19.4646	0.00224941	0.000750365	0.00797156
SMART	SM00199:SCY	6	1.3245	1.0277e-05	ENSBTAG00000007191, ENSBTAG00000001725, ENSBTAG00000011961, ENSBTAG00000009812, ENSBTAG00000025250, ENSBTAG00000010155	103	10	2924	17.033	0.000893705	0.000446952	0.0111064
GOTERM_BP_FAT	GO:0009611~response to wounding	14	3.09051	2.98332e-05	ENSBTAG00000004547, ENSBTAG00000003196, ENSBTAG00000011961, ENSBTAG00000010155, ENSBTAG00000014546, ENSBTAG00000008291, ENSBTAG00000002006, ENSBTAG00000007191, ENSBTAG00000002835, ENSBTAG00000018499, ENSBTAG00000001725, ENSBTAG00000015837, ENSBTAG00000025250, ENSBTAG00000007450	162	106	4989	4.06744	0.03557	0.0120001	0.0482891
GOTERM_BP_FAT	GO:0007626~locomotory behavior	11	2.42826	3.12007e-05	ENSBTAG00000007191, ENSBTAG00000014541, ENSBTAG00000001061, ENSBTAG00000001725, ENSBTAG00000005078, ENSBTAG00000020872, ENSBTAG00000011961, ENSBTAG00000009812, ENSBTAG00000025250, ENSBTAG00000019741, ENSBTAG00000010155	162	64	4989	5.29311	0.0371699	0.00942488	0.0505021
GOTERM_MF_FAT	GO:0005125~cytokine activity	8	1.766	7.96048e-05	ENSBTAG00000007191, ENSBTAG00000003289, ENSBTAG00000001725, ENSBTAG00000011961, ENSBTAG00000009812, ENSBTAG00000025250, ENSBTAG00000010155, ENSBTAG00000003835	161	35	5145	7.30435	0.0283294	0.00573121	0.109319
SP_PIR_KEYWORDS	chemotaxis	6	1.3245	0.000152682	ENSBTAG00000007191, ENSBTAG00000001725, ENSBTAG00000011961, ENSBTAG00000009812, ENSBTAG00000025250, ENSBTAG00000010155	155	18	5056	10.8731	0.0342151	0.0049611	0.195296
SP_PIR_KEYWORDS	cytokine	7	1.54525	0.000192502	ENSBTAG00000007191, ENSBTAG00000001725, ENSBTAG00000011961, ENSBTAG00000009812, ENSBTAG00000025250, ENSBTAG00000010155, ENSBTAG00000003835	155	29	5056	7.87364	0.0429452	0.00547181	0.246172
KEGG_PATHWAY	bta04060:Cytokine-cytokine receptor interaction	13	2.86976	0.000219257	ENSBTAG00000031725, ENSBTAG00000026489, ENSBTAG00000011961, ENSBTAG00000033748, ENSBTAG00000032425, ENSBTAG00000007191, ENSBTAG00000003289, ENSBTAG00000002699, ENSBTAG00000001725, ENSBTAG00000003781, ENSBTAG00000007173, ENSBTAG00000025250, ENSBTAG00000006343	100	109	2949	3.51716	0.0244743	0.0244743	0.248669
GOTERM_BP_FAT	GO:0007610~behavior	12	2.64901	0.000331568	ENSBTAG00000007191, ENSBTAG00000014541, ENSBTAG00000001061, ENSBTAG00000001725, ENSBTAG00000005078, ENSBTAG00000020872, ENSBTAG00000011961, ENSBTAG00000009812, ENSBTAG00000006035, ENSBTAG00000025250, ENSBTAG00000019741, ENSBTAG00000010155	162	100	4989	3.69556	0.331414	0.0773618	0.535459
SP_PIR_KEYWORDS	inflammatory response	6	1.3245	0.000653242	ENSBTAG00000007191, ENSBTAG00000004547, ENSBTAG00000001725, ENSBTAG00000025250, ENSBTAG00000014546, ENSBTAG00000010155	155	24	5056	8.15484	0.13842	0.0147883	0.833099
GOTERM_BP_FAT	GO:0006954~inflammatory response	9	1.98675	0.000844735	ENSBTAG00000007191, ENSBTAG00000004547, ENSBTAG00000002835, ENSBTAG00000001725, ENSBTAG00000025250, ENSBTAG00000007450, ENSBTAG00000014546, ENSBTAG00000010155, ENSBTAG00000002006	162	63	4989	4.39947	0.641541	0.12036	1.35889
GOTERM_BP_FAT	GO:0006952~defense response	11	2.42826	0.00477323	ENSBTAG00000007191, ENSBTAG00000009836, ENSBTAG00000004547, ENSBTAG00000002835, ENSBTAG00000001725, ENSBTAG00000033748, ENSBTAG00000025250, ENSBTAG00000007450, ENSBTAG00000014546, ENSBTAG00000010155, ENSBTAG00000002006	162	119	4989	2.84672	0.996998	0.360337	7.45394
KEGG_PATHWAY	bta04062:Chemokine signaling pathway	7	1.54525	0.19733	ENSBTAG00000007191, ENSBTAG00000003289, ENSBTAG00000001725, ENSBTAG00000011961, ENSBTAG00000009812, ENSBTAG00000025250, ENSBTAG00000032425	100	117	2949	1.76436	1	0.809083	91.757
Annotation Cluster 3; Enrichment Score: 4.1
Category	Term	Count	%	PValue	Genes	List Total	Pop Hits	Pop Total	Fold Enrichment	Bonferroni	Benjamini	FDR
UP_SEQ_FEATURE	disulfide bond	36	7.94702	1.166e-11	ENSBTAG00000019712, ENSBTAG00000004547, ENSBTAG00000021302, ENSBTAG00000008542, ENSBTAG00000017846, ENSBTAG00000000616, ENSBTAG00000008291, ENSBTAG00000002006, ENSBTAG00000000585, ENSBTAG00000021565, ENSBTAG00000017328, ENSBTAG00000020990, ENSBTAG00000006716, ENSBTAG00000002885, ENSBTAG00000002699, ENSBTAG00000025250, ENSBTAG00000001580, ENSBTAG00000039813, ENSBTAG00000004869, ENSBTAG00000011961,…	117	348	4012	3.5473	5.04878e-09	5.04878e-09	1.6451e-08
SP_PIR_KEYWORDS	disulfide bond	36	7.94702	7.11034e-10	ENSBTAG00000019712, ENSBTAG00000004547, ENSBTAG00000021302, ENSBTAG00000008542, ENSBTAG00000017846, ENSBTAG00000000616, ENSBTAG00000008291, ENSBTAG00000002006, ENSBTAG00000000585, ENSBTAG00000021565, ENSBTAG00000017328, ENSBTAG00000020990, ENSBTAG00000006716, ENSBTAG00000002885, ENSBTAG00000002699, ENSBTAG00000025250, ENSBTAG00000001580, ENSBTAG00000039813, ENSBTAG00000004869, ENSBTAG00000011961,…	155	371	5056	3.16522	1.62116e-07	8.10579e-08	9.10304e-07
SP_PIR_KEYWORDS	glycoprotein	41	9.05077	3.54101e-08	ENSBTAG00000004547, ENSBTAG00000019712, ENSBTAG00000021302, ENSBTAG00000014861, ENSBTAG00000008542, ENSBTAG00000017846, ENSBTAG00000000616, ENSBTAG00000008291, ENSBTAG00000002006, ENSBTAG00000001793, ENSBTAG00000000585, ENSBTAG00000003454, ENSBTAG00000020990, ENSBTAG00000007421, ENSBTAG00000006716, ENSBTAG00000002699, ENSBTAG00000002885, ENSBTAG00000039813, ENSBTAG00000004869, ENSBTAG00000010238,…	155	536	5056	2.49514	8.07347e-06	2.69116e-06	4.53339e-05
UP_SEQ_FEATURE	glycosylation site:N-linked (GlcNAc...)	35	7.72627	5.5914e-07	ENSBTAG00000019712, ENSBTAG00000004547, ENSBTAG00000014861, ENSBTAG00000008542, ENSBTAG00000017846, ENSBTAG00000000616, ENSBTAG00000008291, ENSBTAG00000002006, ENSBTAG00000001793, ENSBTAG00000000585, ENSBTAG00000020990, ENSBTAG00000007421, ENSBTAG00000006716, ENSBTAG00000002885, ENSBTAG00000002699, ENSBTAG00000039813, ENSBTAG00000004869, ENSBTAG00000010238, ENSBTAG00000005973, ENSBTAG00000018164,…	117	494	4012	2.4295	0.000242078	8.06993e-05	0.000788882
GOTERM_CC_FAT	GO:0005886~plasma membrane	45	9.93377	4.12548e-05	ENSBTAG00000019712, ENSBTAG00000004547, ENSBTAG00000014861, ENSBTAG00000013525, ENSBTAG00000001061, ENSBTAG00000008870, ENSBTAG00000017846, ENSBTAG00000000616, ENSBTAG00000010244, ENSBTAG00000002006, ENSBTAG00000000585, ENSBTAG00000015565, ENSBTAG00000039682, ENSBTAG00000020990, ENSBTAG00000007421, ENSBTAG00000006716, ENSBTAG00000017574, ENSBTAG00000002699, ENSBTAG00000007994, ENSBTAG00000013245,…	149	640	3834	1.80925	0.00784887	0.00196802	0.0513065
UP_SEQ_FEATURE	topological domain:Extracellular	20	4.41501	0.000360659	ENSBTAG00000013245, ENSBTAG00000004547, ENSBTAG00000019712, ENSBTAG00000014861, ENSBTAG00000004869, ENSBTAG00000010238, ENSBTAG00000018164, ENSBTAG00000014546, ENSBTAG00000017846, ENSBTAG00000000616, ENSBTAG00000008291, ENSBTAG00000020990, ENSBTAG00000008483, ENSBTAG00000007421, ENSBTAG00000030424, ENSBTAG00000002699, ENSBTAG00000019486, ENSBTAG00000002885, ENSBTAG00000010303, ENSBTAG00000018432	117	281	4012	2.44061	0.144606	0.0382959	0.507649
SP_PIR_KEYWORDS	transmembrane	49	10.8168	0.000695221	ENSBTAG00000019712, ENSBTAG00000020872, ENSBTAG00000000616, ENSBTAG00000010244, ENSBTAG00000017846, ENSBTAG00000008291, ENSBTAG00000005069, ENSBTAG00000009737, ENSBTAG00000010238, ENSBTAG00000019386, ENSBTAG00000019741, ENSBTAG00000039555, ENSBTAG00000021517, ENSBTAG00000005033, ENSBTAG00000013791, ENSBTAG00000002786, ENSBTAG00000019486, ENSBTAG00000007312, ENSBTAG00000010068, ENSBTAG00000004547,…	155	1020	5056	1.56701	0.146633	0.0143116	0.886417
SP_PIR_KEYWORDS	cell membrane	18	3.97351	0.0016842	ENSBTAG00000038141, ENSBTAG00000004547, ENSBTAG00000014861, ENSBTAG00000004869, ENSBTAG00000001061, ENSBTAG00000010238, ENSBTAG00000000616, ENSBTAG00000017846, ENSBTAG00000000585, ENSBTAG00000009873, ENSBTAG00000039682, ENSBTAG00000020990, ENSBTAG00000012855, ENSBTAG00000008483, ENSBTAG00000007421, ENSBTAG00000019486, ENSBTAG00000007994, ENSBTAG00000000512	155	254	5056	2.31161	0.319088	0.0291305	2.13491
SP_PIR_KEYWORDS	membrane	57	12.5828	0.00213698	ENSBTAG00000019712, ENSBTAG00000017846, ENSBTAG00000010244, ENSBTAG00000000616, ENSBTAG00000008291, ENSBTAG00000000585, ENSBTAG00000039682, ENSBTAG00000005069, ENSBTAG00000009737, ENSBTAG00000010238, ENSBTAG00000019386, ENSBTAG00000026501, ENSBTAG00000011927, ENSBTAG00000039555, ENSBTAG00000009873, ENSBTAG00000021517, ENSBTAG00000005033, ENSBTAG00000017685, ENSBTAG00000012855, ENSBTAG00000019486,…	155	1305	5056	1.42475	0.385996	0.0319939	2.70164
GOTERM_CC_FAT	GO:0031224~intrinsic to membrane	69	15.2318	0.00343796	ENSBTAG00000019712, ENSBTAG00000020872, ENSBTAG00000008870, ENSBTAG00000017846, ENSBTAG00000010244, ENSBTAG00000000616, ENSBTAG00000008291, ENSBTAG00000000585, ENSBTAG00000011882, ENSBTAG00000005069, ENSBTAG00000009737, ENSBTAG00000010238, ENSBTAG00000019386, ENSBTAG00000019741, ENSBTAG00000010532, ENSBTAG00000014497, ENSBTAG00000039555, ENSBTAG00000009873, ENSBTAG00000021517, ENSBTAG00000005033,…	149	1344	3834	1.32104	0.482001	0.103835	4.19353
UP_SEQ_FEATURE	topological domain:Cytoplasmic	24	5.29801	0.00380283	ENSBTAG00000013245, ENSBTAG00000001580, ENSBTAG00000004547, ENSBTAG00000019712, ENSBTAG00000014861, ENSBTAG00000009737, ENSBTAG00000004869, ENSBTAG00000010238, ENSBTAG00000018164, ENSBTAG00000014603, ENSBTAG00000014546, ENSBTAG00000017846, ENSBTAG00000000616, ENSBTAG00000008291, ENSBTAG00000020990, ENSBTAG00000008483, ENSBTAG00000007421, ENSBTAG00000030424, ENSBTAG00000002699, ENSBTAG00000019486,…	117	447	4012	1.84111	0.807905	0.240398	5.23367
GOTERM_CC_FAT	GO:0044459~plasma membrane part	26	5.73951	0.00755765	ENSBTAG00000019712, ENSBTAG00000008870, ENSBTAG00000017846, ENSBTAG00000002006, ENSBTAG00000015565, ENSBTAG00000007421, ENSBTAG00000002699, ENSBTAG00000007994, ENSBTAG00000013245, ENSBTAG00000002069, ENSBTAG00000020116, ENSBTAG00000004869, ENSBTAG00000031430, ENSBTAG00000019386, ENSBTAG00000010532, ENSBTAG00000014603, ENSBTAG00000014546, ENSBTAG00000012208, ENSBTAG00000020554, ENSBTAG00000017685,…	149	393	3834	1.70234	0.765194	0.18698	9.00538
GOTERM_CC_FAT	GO:0016021~integral to membrane	64	14.128	0.0126179	ENSBTAG00000019712, ENSBTAG00000020872, ENSBTAG00000008870, ENSBTAG00000017846, ENSBTAG00000010244, ENSBTAG00000000616, ENSBTAG00000008291, ENSBTAG00000011882, ENSBTAG00000005069, ENSBTAG00000009737, ENSBTAG00000010238, ENSBTAG00000019386, ENSBTAG00000019741, ENSBTAG00000010532, ENSBTAG00000014497, ENSBTAG00000039555, ENSBTAG00000021517, ENSBTAG00000005033, ENSBTAG00000013759, ENSBTAG00000013791,…	149	1288	3834	1.27859	0.911553	0.261525	14.6114
UP_SEQ_FEATURE	transmembrane region	34	7.50552	0.0233594	ENSBTAG00000010068, ENSBTAG00000019712, ENSBTAG00000004547, ENSBTAG00000014861, ENSBTAG00000018156, ENSBTAG00000018808, ENSBTAG00000017846, ENSBTAG00000000616, ENSBTAG00000010244, ENSBTAG00000008291, ENSBTAG00000020990, ENSBTAG00000007421, ENSBTAG00000002885, ENSBTAG00000002699, ENSBTAG00000005069, ENSBTAG00000013245, ENSBTAG00000001580, ENSBTAG00000009737, ENSBTAG00000004869, ENSBTAG00000010238,…	117	821	4012	1.42007	0.999964	0.679279	28.3578
SP_PIR_KEYWORDS	phosphoprotein	42	9.27152	0.965845	ENSBTAG00000016208, ENSBTAG00000014861, ENSBTAG00000030973, ENSBTAG00000000462, ENSBTAG00000001061, ENSBTAG00000011182, ENSBTAG00000012391, ENSBTAG00000006035, ENSBTAG00000017846, ENSBTAG00000010244, ENSBTAG00000017366, ENSBTAG00000015434, ENSBTAG00000002655, ENSBTAG00000003454, ENSBTAG00000039682, ENSBTAG00000022158, ENSBTAG00000007421, ENSBTAG00000002885, ENSBTAG00000002699, ENSBTAG00000030749,…	155	1669	5056	0.820859	1	1	100
Annotation Cluster 4; Enrichment Score: 3.6
Category	Term	Count	%	PValue	Genes	List Total	Pop Hits	Pop Total	Fold Enrichment	Bonferroni	Benjamini	FDR
GOTERM_MF_FAT	GO:0030246~carbohydrate binding	14	3.09051	2.25942e-07	ENSBTAG00000004547, ENSBTAG00000011932, ENSBTAG00000011961, ENSBTAG00000009812, ENSBTAG00000010155, ENSBTAG00000014546, ENSBTAG00000007223, ENSBTAG00000002006, ENSBTAG00000012855, ENSBTAG00000030424, ENSBTAG00000019612, ENSBTAG00000007312, ENSBTAG00000009012, ENSBTAG00000003835	161	72	5145	6.21377	8.15616e-05	8.15616e-05	0.000310436
INTERPRO	IPR001304:C-type lectin	7	1.54525	3.81138e-05	ENSBTAG00000038843, ENSBTAG00000007720, ENSBTAG00000004547, ENSBTAG00000030424, ENSBTAG00000012815, ENSBTAG00000007312, ENSBTAG00000014546	195	22	6326	10.3221	0.0148674	0.00299132	0.0530117
INTERPRO	IPR016186:C-type lectin-like	7	1.54525	6.53172e-05	ENSBTAG00000038843, ENSBTAG00000007720, ENSBTAG00000004547, ENSBTAG00000030424, ENSBTAG00000012815, ENSBTAG00000007312, ENSBTAG00000014546	195	24	6326	9.46197	0.0253438	0.00426928	0.0908324
SMART	SM00034:CLECT	7	1.54525	7.36989e-05	ENSBTAG00000038843, ENSBTAG00000007720, ENSBTAG00000004547, ENSBTAG00000030424, ENSBTAG00000012815, ENSBTAG00000007312, ENSBTAG00000014546	103	22	2924	9.03266	0.00639153	0.00213506	0.079622
INTERPRO	IPR018378:C-type lectin, conserved site	5	1.10375	0.000349874	ENSBTAG00000004547, ENSBTAG00000030424, ENSBTAG00000013366, ENSBTAG00000007312, ENSBTAG00000014546	195	12	6326	13.5171	0.128487	0.0194546	0.485654
SP_PIR_KEYWORDS	Lectin	4	0.883002	0.0431575	ENSBTAG00000004547, ENSBTAG00000030424, ENSBTAG00000007312, ENSBTAG00000014546	155	26	5056	5.01836	0.999957	0.366951	43.1528
GOTERM_MF_FAT	GO:0005529~sugar binding	4	0.883002	0.0937146	ENSBTAG00000004547, ENSBTAG00000030424, ENSBTAG00000007312, ENSBTAG00000014546	161	35	5145	3.65217	1	0.801044	74.1278
Annotation Cluster 5; Enrichment Score: 3.3
Category	Term	Count	%	PValue	Genes	List Total	Pop Hits	Pop Total	Fold Enrichment	Bonferroni	Benjamini	FDR
INTERPRO	IPR013783:Immunoglobulin-like fold	18	3.97351	4.04601e-07	ENSBTAG00000002069, ENSBTAG00000016208, ENSBTAG00000024947, ENSBTAG00000000603, ENSBTAG00000020116, ENSBTAG00000004869, ENSBTAG00000007275, ENSBTAG00000038288, ENSBTAG00000019386, ENSBTAG00000017846, ENSBTAG00000012208, ENSBTAG00000015565, ENSBTAG00000002699, ENSBTAG00000004043, ENSBTAG00000019497, ENSBTAG00000010303, ENSBTAG00000006343, ENSBTAG00000039932	195	131	6326	4.45755	0.000158996	0.000158996	0.000562888
INTERPRO	IPR003599:Immunoglobulin subtype	13	2.86976	2.73319e-06	ENSBTAG00000024947, ENSBTAG00000000603, ENSBTAG00000004869, ENSBTAG00000007275, ENSBTAG00000038288, ENSBTAG00000031430, ENSBTAG00000017846, ENSBTAG00000002699, ENSBTAG00000004043, ENSBTAG00000019497, ENSBTAG00000010303, ENSBTAG00000006343, ENSBTAG00000039932	195	76	6326	5.54912	0.00107357	0.000536928	0.0038024
SMART	SM00409:IG	13	2.86976	8.18476e-06	ENSBTAG00000024947, ENSBTAG00000000603, ENSBTAG00000004869, ENSBTAG00000007275, ENSBTAG00000038288, ENSBTAG00000031430, ENSBTAG00000017846, ENSBTAG00000002699, ENSBTAG00000004043, ENSBTAG00000019497, ENSBTAG00000010303, ENSBTAG00000006343, ENSBTAG00000039932	103	76	2924	4.8559	0.000711824	0.000711824	0.0088454
INTERPRO	IPR007110:Immunoglobulin-like	15	3.31126	8.5879e-06	ENSBTAG00000002069, ENSBTAG00000024947, ENSBTAG00000020116, ENSBTAG00000000603, ENSBTAG00000004869, ENSBTAG00000007275, ENSBTAG00000031430, ENSBTAG00000019386, ENSBTAG00000017846, ENSBTAG00000012208, ENSBTAG00000015565, ENSBTAG00000002699, ENSBTAG00000004043, ENSBTAG00000010303, ENSBTAG00000006343	195	114	6326	4.26856	0.00336937	0.000843408	0.011947
INTERPRO	IPR013151:Immunoglobulin	7	1.54525	0.0014139	ENSBTAG00000000603, ENSBTAG00000002699, ENSBTAG00000038288, ENSBTAG00000004043, ENSBTAG00000010303, ENSBTAG00000017846, ENSBTAG00000006343	195	41	6326	5.53871	0.426534	0.0452809	1.9492
INTERPRO	IPR013106:Immunoglobulin V-set	5	1.10375	0.0417293	ENSBTAG00000000603, ENSBTAG00000004869, ENSBTAG00000007275, ENSBTAG00000031430, ENSBTAG00000017846	195	43	6326	3.77221	1	0.626706	44.7338
INTERPRO	IPR003598:Immunoglobulin subtype 2	4	0.883002	0.0484032	ENSBTAG00000000603, ENSBTAG00000004869, ENSBTAG00000002699, ENSBTAG00000017846	195	27	6326	4.80608	1	0.661502	49.8544
SMART	SM00408:IGc2	4	0.883002	0.0657741	ENSBTAG00000000603, ENSBTAG00000004869, ENSBTAG00000002699, ENSBTAG00000017846	103	27	2924	4.20568	0.997313	0.627134	52.0646
SP_PIR_KEYWORDS	Immunoglobulin domain	4	0.883002	0.202243	ENSBTAG00000004869, ENSBTAG00000002699, ENSBTAG00000010303, ENSBTAG00000017846	155	51	5056	2.55838	1	0.851629	94.4577
Annotation Cluster 6; Enrichment Score: 2.8
Category	Term	Count	%	PValue	Genes	List Total	Pop Hits	Pop Total	Fold Enrichment	Bonferroni	Benjamini	FDR
INTERPRO	IPR013783:Immunoglobulin-like fold	18	3.97351	4.04601e-07	ENSBTAG00000002069, ENSBTAG00000016208, ENSBTAG00000024947, ENSBTAG00000000603, ENSBTAG00000020116, ENSBTAG00000004869, ENSBTAG00000007275, ENSBTAG00000038288, ENSBTAG00000019386, ENSBTAG00000017846, ENSBTAG00000012208, ENSBTAG00000015565, ENSBTAG00000002699, ENSBTAG00000004043, ENSBTAG00000019497, ENSBTAG00000010303, ENSBTAG00000006343, ENSBTAG00000039932	195	131	6326	4.45755	0.000158996	0.000158996	0.000562888
INTERPRO	IPR007110:Immunoglobulin-like	15	3.31126	8.5879e-06	ENSBTAG00000002069, ENSBTAG00000024947, ENSBTAG00000020116, ENSBTAG00000000603, ENSBTAG00000004869, ENSBTAG00000007275, ENSBTAG00000031430, ENSBTAG00000019386, ENSBTAG00000017846, ENSBTAG00000012208, ENSBTAG00000015565, ENSBTAG00000002699, ENSBTAG00000004043, ENSBTAG00000010303, ENSBTAG00000006343	195	114	6326	4.26856	0.00336937	0.000843408	0.011947
INTERPRO	IPR010579:MHC class I, alpha chain, C-terminal	4	0.883002	0.000530512	ENSBTAG00000002069, ENSBTAG00000020116, ENSBTAG00000019386, ENSBTAG00000012208	195	6	6326	21.6274	0.188237	0.0229054	0.735537
SP_PIR_KEYWORDS	mhc i	4	0.883002	0.000886473	ENSBTAG00000002069, ENSBTAG00000020116, ENSBTAG00000019386, ENSBTAG00000012208	155	7	5056	18.6396	0.183073	0.0167093	1.12899
INTERPRO	IPR011161:MHC class I-like antigen recognition	5	1.10375	0.00116809	ENSBTAG00000002069, ENSBTAG00000020116, ENSBTAG00000019386, ENSBTAG00000008291, ENSBTAG00000012208	195	16	6326	10.1378	0.368291	0.0408971	1.61287
GOTERM_BP_FAT	GO:0019882~antigen processing and presentation	7	1.54525	0.00330732	ENSBTAG00000002069, ENSBTAG00000015565, ENSBTAG00000020116, ENSBTAG00000010303, ENSBTAG00000019386, ENSBTAG00000008291, ENSBTAG00000012208	162	46	4989	4.68639	0.982078	0.331136	5.22213
GOTERM_BP_FAT	GO:0002474~antigen processing and presentation of peptide antigen via MHC class I	4	0.883002	0.00449693	ENSBTAG00000002069, ENSBTAG00000020116, ENSBTAG00000019386, ENSBTAG00000012208	162	11	4989	11.1987	0.995795	0.391901	7.03709
INTERPRO	IPR003006:Immunoglobulin/major histocompatibility complex, conserved site	5	1.10375	0.00480465	ENSBTAG00000002069, ENSBTAG00000015565, ENSBTAG00000020116, ENSBTAG00000019386, ENSBTAG00000012208	195	23	6326	7.0524	0.849347	0.135495	6.48089
INTERPRO	IPR001039:MHC class I, alpha chain, alpha1 and alpha2	4	0.883002	0.00647106	ENSBTAG00000002069, ENSBTAG00000020116, ENSBTAG00000019386, ENSBTAG00000012208	195	13	6326	9.98185	0.922027	0.166601	8.63607
INTERPRO	IPR003597:Immunoglobulin C1-set	5	1.10375	0.00654369	ENSBTAG00000002069, ENSBTAG00000015565, ENSBTAG00000020116, ENSBTAG00000019386, ENSBTAG00000012208	195	25	6326	6.48821	0.924235	0.158028	8.72893
SP_PIR_KEYWORDS	immune response	7	1.54525	0.00669056	ENSBTAG00000002069, ENSBTAG00000004547, ENSBTAG00000020116, ENSBTAG00000019386, ENSBTAG00000007450, ENSBTAG00000014546, ENSBTAG00000012208	155	56	5056	4.07742	0.783589	0.0773972	8.23544
SMART	SM00407:IGc1	5	1.10375	0.0100398	ENSBTAG00000002069, ENSBTAG00000015565, ENSBTAG00000020116, ENSBTAG00000019386, ENSBTAG00000012208	103	25	2924	5.67767	0.584335	0.161026	10.3318
GOTERM_BP_FAT	GO:0048002~antigen processing and presentation of peptide antigen	4	0.883002	0.0160794	ENSBTAG00000002069, ENSBTAG00000020116, ENSBTAG00000019386, ENSBTAG00000012208	162	17	4989	7.24619	1	0.70769	23.0829
GOTERM_CC_FAT	GO:0042611~MHC protein complex	5	1.10375	0.0212104	ENSBTAG00000002069, ENSBTAG00000015565, ENSBTAG00000020116, ENSBTAG00000019386, ENSBTAG00000012208	149	28	3834	4.59492	0.983341	0.336003	23.4085
GOTERM_CC_FAT	GO:0042612~MHC class I protein complex	4	0.883002	0.0346965	ENSBTAG00000002069, ENSBTAG00000020116, ENSBTAG00000019386, ENSBTAG00000012208	149	19	3834	5.41717	0.998823	0.382309	35.5493
Annotation Cluster 7; Enrichment Score: 2.3
Category	Term	Count	%	PValue	Genes	List Total	Pop Hits	Pop Total	Fold Enrichment	Bonferroni	Benjamini	FDR
KEGG_PATHWAY	bta04080:Neuroactive ligand-receptor interaction	10	2.20751	0.000318983	ENSBTAG00000021565, ENSBTAG00000020990, ENSBTAG00000008483, ENSBTAG00000010238, ENSBTAG00000020872, ENSBTAG00000021958, ENSBTAG00000005527, ENSBTAG00000019741, ENSBTAG00000020467, ENSBTAG00000007996	100	67	2949	4.40149	0.0354088	0.017864	0.361586
SP_PIR_KEYWORDS	receptor	20	4.41501	0.000329074	ENSBTAG00000013245, ENSBTAG00000004547, ENSBTAG00000014861, ENSBTAG00000004869, ENSBTAG00000007275, ENSBTAG00000010238, ENSBTAG00000020872, ENSBTAG00000033748, ENSBTAG00000019741, ENSBTAG00000000616, ENSBTAG00000008291, ENSBTAG00000020990, ENSBTAG00000008483, ENSBTAG00000013791, ENSBTAG00000002699, ENSBTAG00000002885, ENSBTAG00000007173, ENSBTAG00000004043, ENSBTAG00000015837, ENSBTAG00000006343	155	262	5056	2.49003	0.0722947	0.00830324	0.420481
GOTERM_BP_FAT	GO:0007186~G-protein coupled receptor protein signaling pathway	14	3.09051	0.000555841	ENSBTAG00000038141, ENSBTAG00000010238, ENSBTAG00000020872, ENSBTAG00000021609, ENSBTAG00000019741, ENSBTAG00000000616, ENSBTAG00000014497, ENSBTAG00000020990, ENSBTAG00000020997, ENSBTAG00000008483, ENSBTAG00000013791, ENSBTAG00000003528, ENSBTAG00000015837, ENSBTAG00000007996	162	141	4989	3.05779	0.490833	0.0919225	0.896118
GOTERM_BP_FAT	GO:0007166~cell surface receptor linked signal transduction	21	4.63576	0.00465017	ENSBTAG00000038141, ENSBTAG00000010238, ENSBTAG00000020872, ENSBTAG00000021609, ENSBTAG00000019741, ENSBTAG00000014546, ENSBTAG00000000616, ENSBTAG00000014497, ENSBTAG00000020990, ENSBTAG00000014541, ENSBTAG00000008483, ENSBTAG00000002835, ENSBTAG00000020997, ENSBTAG00000013791, ENSBTAG00000004322, ENSBTAG00000002699, ENSBTAG00000003528, ENSBTAG00000007173, ENSBTAG00000015837, ENSBTAG00000007996,…	162	332	4989	1.94796	0.996512	0.375959	7.2685
SP_PIR_KEYWORDS	g-protein coupled receptor	8	1.766	0.00690766	ENSBTAG00000020990, ENSBTAG00000008483, ENSBTAG00000013791, ENSBTAG00000010238, ENSBTAG00000020872, ENSBTAG00000015837, ENSBTAG00000019741, ENSBTAG00000000616	155	74	5056	3.52642	0.79411	0.0759791	8.49188
INTERPRO	IPR000276:7TM GPCR, rhodopsin-like	7	1.54525	0.0198517	ENSBTAG00000020990, ENSBTAG00000013791, ENSBTAG00000010238, ENSBTAG00000020872, ENSBTAG00000015837, ENSBTAG00000019741, ENSBTAG00000000616	195	70	6326	3.2441	0.999622	0.38891	24.3429
INTERPRO	IPR017452:GPCR, rhodopsin-like superfamily	7	1.54525	0.0198517	ENSBTAG00000020990, ENSBTAG00000013791, ENSBTAG00000010238, ENSBTAG00000020872, ENSBTAG00000015837, ENSBTAG00000019741, ENSBTAG00000000616	195	70	6326	3.2441	0.999622	0.38891	24.3429
SP_PIR_KEYWORDS	transducer	8	1.766	0.025023	ENSBTAG00000020990, ENSBTAG00000008483, ENSBTAG00000013791, ENSBTAG00000010238, ENSBTAG00000020872, ENSBTAG00000015837, ENSBTAG00000019741, ENSBTAG00000000616	155	95	5056	2.74689	0.996905	0.24053	27.7064
PIR_SUPERFAMILY	PIRSF800006:rhodopsin-like G protein-coupled receptors	5	1.10375	0.0720577	ENSBTAG00000020990, ENSBTAG00000010238, ENSBTAG00000015837, ENSBTAG00000019741, ENSBTAG00000000616	89	48	2661	3.11447	0.999293	0.999293	56.19
Annotation Cluster 8; Enrichment Score: 2.2
Category	Term	Count	%	PValue	Genes	List Total	Pop Hits	Pop Total	Fold Enrichment	Bonferroni	Benjamini	FDR
GOTERM_BP_FAT	GO:0009611~response to wounding	14	3.09051	2.98332e-05	ENSBTAG00000004547, ENSBTAG00000003196, ENSBTAG00000011961, ENSBTAG00000010155, ENSBTAG00000014546, ENSBTAG00000008291, ENSBTAG00000002006, ENSBTAG00000007191, ENSBTAG00000002835, ENSBTAG00000018499, ENSBTAG00000001725, ENSBTAG00000015837, ENSBTAG00000025250, ENSBTAG00000007450	162	106	4989	4.06744	0.03557	0.0120001	0.0482891
GOTERM_BP_FAT	GO:0050878~regulation of body fluid levels	6	1.3245	0.00551667	ENSBTAG00000004588, ENSBTAG00000018499, ENSBTAG00000003196, ENSBTAG00000011961, ENSBTAG00000015837, ENSBTAG00000008291	162	36	4989	5.13272	0.998788	0.38103	8.56686
GOTERM_BP_FAT	GO:0007596~blood coagulation	5	1.10375	0.0185822	ENSBTAG00000018499, ENSBTAG00000003196, ENSBTAG00000011961, ENSBTAG00000015837, ENSBTAG00000008291	162	32	4989	4.81192	1	0.738016	26.19
GOTERM_BP_FAT	GO:0050817~coagulation	5	1.10375	0.0185822	ENSBTAG00000018499, ENSBTAG00000003196, ENSBTAG00000011961, ENSBTAG00000015837, ENSBTAG00000008291	162	32	4989	4.81192	1	0.738016	26.19
GOTERM_BP_FAT	GO:0007599~hemostasis	5	1.10375	0.0206275	ENSBTAG00000018499, ENSBTAG00000003196, ENSBTAG00000011961, ENSBTAG00000015837, ENSBTAG00000008291	162	33	4989	4.66611	1	0.754819	28.6414
GOTERM_BP_FAT	GO:0042060~wound healing	5	1.10375	0.0559087	ENSBTAG00000018499, ENSBTAG00000003196, ENSBTAG00000011961, ENSBTAG00000015837, ENSBTAG00000008291	162	45	4989	3.42181	1	0.924742	60.6018
Annotation Cluster 9; Enrichment Score: 2.2
Category	Term	Count	%	PValue	Genes	List Total	Pop Hits	Pop Total	Fold Enrichment	Bonferroni	Benjamini	FDR
SP_PIR_KEYWORDS	cell membrane	18	3.97351	0.0016842	ENSBTAG00000038141, ENSBTAG00000004547, ENSBTAG00000014861, ENSBTAG00000004869, ENSBTAG00000001061, ENSBTAG00000010238, ENSBTAG00000000616, ENSBTAG00000017846, ENSBTAG00000000585, ENSBTAG00000009873, ENSBTAG00000039682, ENSBTAG00000020990, ENSBTAG00000012855, ENSBTAG00000008483, ENSBTAG00000007421, ENSBTAG00000019486, ENSBTAG00000007994, ENSBTAG00000000512	155	254	5056	2.31161	0.319088	0.0291305	2.13491
GOTERM_CC_FAT	GO:0043296~apical junction complex	6	1.3245	0.00187858	ENSBTAG00000017685, ENSBTAG00000004869, ENSBTAG00000007421, ENSBTAG00000019486, ENSBTAG00000017564, ENSBTAG00000017846	149	24	3834	6.43289	0.301728	0.0693102	2.3119
GOTERM_CC_FAT	GO:0016327~apicolateral plasma membrane	6	1.3245	0.00187858	ENSBTAG00000017685, ENSBTAG00000004869, ENSBTAG00000007421, ENSBTAG00000019486, ENSBTAG00000017564, ENSBTAG00000017846	149	24	3834	6.43289	0.301728	0.0693102	2.3119
SP_PIR_KEYWORDS	cell junction	8	1.766	0.00191466	ENSBTAG00000017685, ENSBTAG00000004247, ENSBTAG00000004869, ENSBTAG00000007421, ENSBTAG00000019486, ENSBTAG00000000512, ENSBTAG00000014603, ENSBTAG00000017846	155	59	5056	4.42296	0.354004	0.0307295	2.42375
GOTERM_BP_FAT	GO:0007155~cell adhesion	11	2.42826	0.00637843	ENSBTAG00000004547, ENSBTAG00000017685, ENSBTAG00000024947, ENSBTAG00000010082, ENSBTAG00000004869, ENSBTAG00000007421, ENSBTAG00000008542, ENSBTAG00000010303, ENSBTAG00000014546, ENSBTAG00000017846, ENSBTAG00000002006	162	124	4989	2.73193	0.999577	0.404218	9.8412
GOTERM_BP_FAT	GO:0022610~biological adhesion	11	2.42826	0.00637843	ENSBTAG00000004547, ENSBTAG00000017685, ENSBTAG00000024947, ENSBTAG00000010082, ENSBTAG00000004869, ENSBTAG00000007421, ENSBTAG00000008542, ENSBTAG00000010303, ENSBTAG00000014546, ENSBTAG00000017846, ENSBTAG00000002006	162	124	4989	2.73193	0.999577	0.404218	9.8412
GOTERM_CC_FAT	GO:0044459~plasma membrane part	26	5.73951	0.00755765	ENSBTAG00000019712, ENSBTAG00000008870, ENSBTAG00000017846, ENSBTAG00000002006, ENSBTAG00000015565, ENSBTAG00000007421, ENSBTAG00000002699, ENSBTAG00000007994, ENSBTAG00000013245, ENSBTAG00000002069, ENSBTAG00000020116, ENSBTAG00000004869, ENSBTAG00000031430, ENSBTAG00000019386, ENSBTAG00000010532, ENSBTAG00000014603, ENSBTAG00000014546, ENSBTAG00000012208, ENSBTAG00000020554, ENSBTAG00000017685,…	149	393	3834	1.70234	0.765194	0.18698	9.00538
GOTERM_CC_FAT	GO:0005911~cell-cell junction	6	1.3245	0.0195776	ENSBTAG00000017685, ENSBTAG00000004869, ENSBTAG00000007421, ENSBTAG00000019486, ENSBTAG00000017564, ENSBTAG00000017846	149	41	3834	3.76559	0.977095	0.34269	21.8038
GOTERM_CC_FAT	GO:0005923~tight junction	4	0.883002	0.0257518	ENSBTAG00000004869, ENSBTAG00000007421, ENSBTAG00000019486, ENSBTAG00000017846	149	17	3834	6.05448	0.993147	0.364284	27.7136
GOTERM_CC_FAT	GO:0070160~occluding junction	4	0.883002	0.0257518	ENSBTAG00000004869, ENSBTAG00000007421, ENSBTAG00000019486, ENSBTAG00000017846	149	17	3834	6.05448	0.993147	0.364284	27.7136
GOTERM_CC_FAT	GO:0030054~cell junction	9	1.98675	0.0274515	ENSBTAG00000017685, ENSBTAG00000004247, ENSBTAG00000004869, ENSBTAG00000007421, ENSBTAG00000019486, ENSBTAG00000000512, ENSBTAG00000017564, ENSBTAG00000014603, ENSBTAG00000017846	149	94	3834	2.46366	0.99509	0.357922	29.2668
Annotation Cluster 10; Enrichment Score: 2.0
Category	Term	Count	%	PValue	Genes	List Total	Pop Hits	Pop Total	Fold Enrichment	Bonferroni	Benjamini	FDR
INTERPRO	IPR018114:Peptidase S1/S6, chymotrypsin/Hap, active site	5	1.10375	0.000493312	ENSBTAG00000021565, ENSBTAG00000019712, ENSBTAG00000039813, ENSBTAG00000021958, ENSBTAG00000007450	195	13	6326	12.4773	0.176276	0.0239485	0.684124
GOTERM_MF_FAT	GO:0004252~serine-type endopeptidase activity	7	1.54525	0.000739669	ENSBTAG00000021565, ENSBTAG00000019712, ENSBTAG00000039813, ENSBTAG00000021958, ENSBTAG00000007450, ENSBTAG00000021616, ENSBTAG00000002100	161	36	5145	6.21377	0.234418	0.037441	1.01151
INTERPRO	IPR001314:Peptidase S1A, chymotrypsin	5	1.10375	0.000897422	ENSBTAG00000021565, ENSBTAG00000019712, ENSBTAG00000039813, ENSBTAG00000021958, ENSBTAG00000007450	195	15	6326	10.8137	0.297314	0.0346693	1.2413
INTERPRO	IPR001254:Peptidase S1 and S6, chymotrypsin/Hap	5	1.10375	0.00116809	ENSBTAG00000021565, ENSBTAG00000019712, ENSBTAG00000039813, ENSBTAG00000021958, ENSBTAG00000007450	195	16	6326	10.1378	0.368291	0.0408971	1.61287
SMART	SM00020:Tryp_SPc	5	1.10375	0.00183856	ENSBTAG00000021565, ENSBTAG00000019712, ENSBTAG00000039813, ENSBTAG00000021958, ENSBTAG00000007450	103	16	2924	8.87136	0.147943	0.0392351	1.96922
GOTERM_MF_FAT	GO:0008236~serine-type peptidase activity	7	1.54525	0.00245585	ENSBTAG00000021565, ENSBTAG00000019712, ENSBTAG00000039813, ENSBTAG00000021958, ENSBTAG00000007450, ENSBTAG00000021616, ENSBTAG00000002100	161	45	5145	4.97101	0.588379	0.0939203	3.32198
GOTERM_MF_FAT	GO:0017171~serine hydrolase activity	7	1.54525	0.00275294	ENSBTAG00000021565, ENSBTAG00000019712, ENSBTAG00000039813, ENSBTAG00000021958, ENSBTAG00000007450, ENSBTAG00000021616, ENSBTAG00000002100	161	46	5145	4.86295	0.630343	0.0947264	3.71683
UP_SEQ_FEATURE	domain:Peptidase S1	4	0.883002	0.0042819	ENSBTAG00000021565, ENSBTAG00000019712, ENSBTAG00000039813, ENSBTAG00000007450	117	12	4012	11.4302	0.844023	0.233128	5.87463
SP_PIR_KEYWORDS	Serine protease	5	1.10375	0.00466382	ENSBTAG00000021565, ENSBTAG00000019712, ENSBTAG00000039813, ENSBTAG00000021958, ENSBTAG00000007450	155	23	5056	7.09116	0.655561	0.0574942	5.80927
UP_SEQ_FEATURE	active site:Charge relay system	5	1.10375	0.0174043	ENSBTAG00000021565, ENSBTAG00000012855, ENSBTAG00000019712, ENSBTAG00000039813, ENSBTAG00000007450	117	35	4012	4.89866	0.999501	0.613376	21.942
GOTERM_MF_FAT	GO:0004175~endopeptidase activity	9	1.98675	0.0485948	ENSBTAG00000021565, ENSBTAG00000019712, ENSBTAG00000039813, ENSBTAG00000005078, ENSBTAG00000013366, ENSBTAG00000021958, ENSBTAG00000007450, ENSBTAG00000021616, ENSBTAG00000002100	161	130	5145	2.21237	1	0.57529	49.5631
GOTERM_MF_FAT	GO:0070011~peptidase activity, acting on L-amino acid peptides	10	2.20751	0.155481	ENSBTAG00000013496, ENSBTAG00000021565, ENSBTAG00000019712, ENSBTAG00000039813, ENSBTAG00000005078, ENSBTAG00000013366, ENSBTAG00000021958, ENSBTAG00000007450, ENSBTAG00000021616, ENSBTAG00000002100	161	196	5145	1.63043	1	0.904281	90.1908
GOTERM_MF_FAT	GO:0008233~peptidase activity	10	2.20751	0.186879	ENSBTAG00000013496, ENSBTAG00000021565, ENSBTAG00000019712, ENSBTAG00000039813, ENSBTAG00000005078, ENSBTAG00000013366, ENSBTAG00000021958, ENSBTAG00000007450, ENSBTAG00000021616, ENSBTAG00000002100	161	205	5145	1.55885	1	0.930554	94.1714
SP_PIR_KEYWORDS	Protease	6	1.3245	0.326344	ENSBTAG00000021565, ENSBTAG00000019712, ENSBTAG00000039813, ENSBTAG00000005078, ENSBTAG00000021958, ENSBTAG00000007450	155	124	5056	1.57836	1	0.945274	99.3638
SP_PIR_KEYWORDS	hydrolase	15	3.31126	0.704208	ENSBTAG00000005805, ENSBTAG00000019712, ENSBTAG00000039813, ENSBTAG00000021958, ENSBTAG00000020178, ENSBTAG00000021565, ENSBTAG00000012855, ENSBTAG00000015241, ENSBTAG00000004982, ENSBTAG00000005078, ENSBTAG00000012338, ENSBTAG00000019612, ENSBTAG00000030749, ENSBTAG00000007450, ENSBTAG00000013569	155	511	5056	0.957515	1	0.99933	100
GOTERM_BP_FAT	GO:0006508~proteolysis	11	2.42826	0.742408	ENSBTAG00000013496, ENSBTAG00000021565, ENSBTAG00000019712, ENSBTAG00000039813, ENSBTAG00000005078, ENSBTAG00000013366, ENSBTAG00000021958, ENSBTAG00000007450, ENSBTAG00000021616, ENSBTAG00000002100, ENSBTAG00000007223	162	362	4989	0.935799	1	1	100
Annotation Cluster 11; Enrichment Score: 1.4
Category	Term	Count	%	PValue	Genes	List Total	Pop Hits	Pop Total	Fold Enrichment	Bonferroni	Benjamini	FDR
GOTERM_BP_FAT	GO:0042127~regulation of cell proliferation	16	3.53201	0.000460141	ENSBTAG00000015345, ENSBTAG00000004869, ENSBTAG00000001061, ENSBTAG00000010532, ENSBTAG00000002006, ENSBTAG00000014541, ENSBTAG00000002835, ENSBTAG00000008483, ENSBTAG00000007421, ENSBTAG00000006716, ENSBTAG00000002699, ENSBTAG00000019612, ENSBTAG00000008353, ENSBTAG00000014127, ENSBTAG00000013569, ENSBTAG00000003835	162	175	4989	2.81566	0.42807	0.0889188	0.742371
GOTERM_BP_FAT	GO:0008285~negative regulation of cell proliferation	9	1.98675	0.00223154	ENSBTAG00000002835, ENSBTAG00000015345, ENSBTAG00000004869, ENSBTAG00000007421, ENSBTAG00000001061, ENSBTAG00000019612, ENSBTAG00000008353, ENSBTAG00000003835, ENSBTAG00000002006	162	73	4989	3.7968	0.933604	0.260178	3.55227
GOTERM_BP_FAT	GO:0001525~angiogenesis	4	0.883002	0.122737	ENSBTAG00000014541, ENSBTAG00000019612, ENSBTAG00000003835, ENSBTAG00000002006	162	38	4989	3.24172	1	0.993042	87.9974
GOTERM_BP_FAT	GO:0001568~blood vessel development	5	1.10375	0.1694	ENSBTAG00000014541, ENSBTAG00000007421, ENSBTAG00000019612, ENSBTAG00000003835, ENSBTAG00000002006	162	67	4989	2.29823	1	0.995896	95.046
GOTERM_BP_FAT	GO:0001944~vasculature development	5	1.10375	0.175777	ENSBTAG00000014541, ENSBTAG00000007421, ENSBTAG00000019612, ENSBTAG00000003835, ENSBTAG00000002006	162	68	4989	2.26443	1	0.995737	95.6272
GOTERM_BP_FAT	GO:0032268~regulation of cellular protein metabolic process	7	1.54525	0.205346	ENSBTAG00000014541, ENSBTAG00000001061, ENSBTAG00000019612, ENSBTAG00000003901, ENSBTAG00000007223, ENSBTAG00000003835, ENSBTAG00000002006	162	123	4989	1.75263	1	0.997012	97.5796
GOTERM_BP_FAT	GO:0048514~blood vessel morphogenesis	4	0.883002	0.270071	ENSBTAG00000014541, ENSBTAG00000019612, ENSBTAG00000003835, ENSBTAG00000002006	162	56	4989	2.19974	1	0.99745	99.3883
Annotation Cluster 12; Enrichment Score: 1.3
Category	Term	Count	%	PValue	Genes	List Total	Pop Hits	Pop Total	Fold Enrichment	Bonferroni	Benjamini	FDR
GOTERM_MF_FAT	GO:0005261~cation channel activity	7	1.54525	0.00950999	ENSBTAG00000004588, ENSBTAG00000008626, ENSBTAG00000019355, ENSBTAG00000013245, ENSBTAG00000008870, ENSBTAG00000010532, ENSBTAG00000025642	161	59	5145	3.79145	0.96824	0.269184	12.3036
GOTERM_MF_FAT	GO:0046873~metal ion transmembrane transporter activity	8	1.766	0.0159657	ENSBTAG00000004588, ENSBTAG00000008626, ENSBTAG00000019355, ENSBTAG00000013245, ENSBTAG00000008870, ENSBTAG00000010532, ENSBTAG00000000945, ENSBTAG00000025642	161	85	5145	3.00767	0.997003	0.383795	19.839
GOTERM_MF_FAT	GO:0022836~gated channel activity	7	1.54525	0.0172019	ENSBTAG00000004588, ENSBTAG00000008626, ENSBTAG00000013245, ENSBTAG00000008870, ENSBTAG00000010532, ENSBTAG00000010244, ENSBTAG00000025642	161	67	5145	3.33874	0.998096	0.382353	21.2116
GOTERM_MF_FAT	GO:0005216~ion channel activity	8	1.766	0.0201146	ENSBTAG00000004588, ENSBTAG00000008626, ENSBTAG00000019355, ENSBTAG00000013245, ENSBTAG00000008870, ENSBTAG00000010532, ENSBTAG00000010244, ENSBTAG00000025642	161	89	5145	2.8725	0.999348	0.386777	24.3601
GOTERM_MF_FAT	GO:0022838~substrate specific channel activity	8	1.766	0.0201146	ENSBTAG00000004588, ENSBTAG00000008626, ENSBTAG00000019355, ENSBTAG00000013245, ENSBTAG00000008870, ENSBTAG00000010532, ENSBTAG00000010244, ENSBTAG00000025642	161	89	5145	2.8725	0.999348	0.386777	24.3601
GOTERM_MF_FAT	GO:0005267~potassium channel activity	5	1.10375	0.0202091	ENSBTAG00000004588, ENSBTAG00000008626, ENSBTAG00000019355, ENSBTAG00000008870, ENSBTAG00000010532	161	34	5145	4.69949	0.99937	0.369119	24.4602
GOTERM_MF_FAT	GO:0022803~passive transmembrane transporter activity	8	1.766	0.022449	ENSBTAG00000004588, ENSBTAG00000008626, ENSBTAG00000019355, ENSBTAG00000013245, ENSBTAG00000008870, ENSBTAG00000010532, ENSBTAG00000010244, ENSBTAG00000025642	161	91	5145	2.80936	0.999724	0.382541	26.7987
GOTERM_MF_FAT	GO:0015267~channel activity	8	1.766	0.022449	ENSBTAG00000004588, ENSBTAG00000008626, ENSBTAG00000019355, ENSBTAG00000013245, ENSBTAG00000008870, ENSBTAG00000010532, ENSBTAG00000010244, ENSBTAG00000025642	161	91	5145	2.80936	0.999724	0.382541	26.7987
GOTERM_BP_FAT	GO:0030001~metal ion transport	10	2.20751	0.02837	ENSBTAG00000008626, ENSBTAG00000019355, ENSBTAG00000013245, ENSBTAG00000005015, ENSBTAG00000014861, ENSBTAG00000039190, ENSBTAG00000008870, ENSBTAG00000010532, ENSBTAG00000000945, ENSBTAG00000025642	162	134	4989	2.29823	1	0.825696	37.2462
GOTERM_BP_FAT	GO:0006812~cation transport	10	2.20751	0.132515	ENSBTAG00000008626, ENSBTAG00000019355, ENSBTAG00000013245, ENSBTAG00000005015, ENSBTAG00000014861, ENSBTAG00000039190, ENSBTAG00000008870, ENSBTAG00000010532, ENSBTAG00000000945, ENSBTAG00000025642	162	182	4989	1.6921	1	0.994645	89.9895
GOTERM_BP_FAT	GO:0006813~potassium ion transport	4	0.883002	0.137382	ENSBTAG00000008626, ENSBTAG00000019355, ENSBTAG00000008870, ENSBTAG00000010532	162	40	4989	3.07963	1	0.994891	90.8609
GOTERM_BP_FAT	GO:0015672~monovalent inorganic cation transport	6	1.3245	0.232318	ENSBTAG00000008626, ENSBTAG00000019355, ENSBTAG00000014861, ENSBTAG00000039190, ENSBTAG00000008870, ENSBTAG00000010532	162	102	4989	1.81155	1	0.996757	98.6162
GOTERM_BP_FAT	GO:0006811~ion transport	11	2.42826	0.234095	ENSBTAG00000008626, ENSBTAG00000019355, ENSBTAG00000013245, ENSBTAG00000005015, ENSBTAG00000014861, ENSBTAG00000039190, ENSBTAG00000008870, ENSBTAG00000010532, ENSBTAG00000010244, ENSBTAG00000000945, ENSBTAG00000025642	162	237	4989	1.42936	1	0.996587	98.6671
GOTERM_BP_FAT	GO:0015674~di-, tri-valent inorganic cation transport	4	0.883002	0.235079	ENSBTAG00000013245, ENSBTAG00000005015, ENSBTAG00000000945, ENSBTAG00000025642	162	52	4989	2.36895	1	0.996336	98.6946
GOTERM_BP_FAT	GO:0055085~transmembrane transport	8	1.766	0.500316	ENSBTAG00000013245, ENSBTAG00000005015, ENSBTAG00000011882, ENSBTAG00000039190, ENSBTAG00000013452, ENSBTAG00000018808, ENSBTAG00000008870, ENSBTAG00000025642	162	206	4989	1.19597	1	0.999883	99.9987
Annotation Cluster 13; Enrichment Score: 1.1
Category	Term	Count	%	PValue	Genes	List Total	Pop Hits	Pop Total	Fold Enrichment	Bonferroni	Benjamini	FDR
GOTERM_BP_FAT	GO:0060541~respiratory system development	4	0.883002	0.0547598	ENSBTAG00000014541, ENSBTAG00000007173, ENSBTAG00000002333, ENSBTAG00000003835	162	27	4989	4.56241	1	0.927888	59.8184
GOTERM_BP_FAT	GO:0030323~respiratory tube development	4	0.883002	0.0547598	ENSBTAG00000014541, ENSBTAG00000007173, ENSBTAG00000002333, ENSBTAG00000003835	162	27	4989	4.56241	1	0.927888	59.8184
GOTERM_BP_FAT	GO:0030324~lung development	4	0.883002	0.0547598	ENSBTAG00000014541, ENSBTAG00000007173, ENSBTAG00000002333, ENSBTAG00000003835	162	27	4989	4.56241	1	0.927888	59.8184
GOTERM_BP_FAT	GO:0035295~tube development	4	0.883002	0.243756	ENSBTAG00000014541, ENSBTAG00000007173, ENSBTAG00000002333, ENSBTAG00000003835	162	53	4989	2.32425	1	0.996493	98.9147
Annotation Cluster 14; Enrichment Score: 1.1
Category	Term	Count	%	PValue	Genes	List Total	Pop Hits	Pop Total	Fold Enrichment	Bonferroni	Benjamini	FDR
KEGG_PATHWAY	bta05218:Melanoma	5	1.10375	0.0368152	ENSBTAG00000014541, ENSBTAG00000019241, ENSBTAG00000007173, ENSBTAG00000008353, ENSBTAG00000014400	100	38	2949	3.88026	0.985573	0.653425	34.6818
KEGG_PATHWAY	bta05214:Glioma	5	1.10375	0.0582009	ENSBTAG00000014541, ENSBTAG00000001061, ENSBTAG00000007173, ENSBTAG00000008353, ENSBTAG00000014400	100	44	2949	3.35114	0.998859	0.676744	49.3809
KEGG_PATHWAY	bta05215:Prostate cancer	5	1.10375	0.140434	ENSBTAG00000014541, ENSBTAG00000006143, ENSBTAG00000007173, ENSBTAG00000008353, ENSBTAG00000014400	100	60	2949	2.4575	1	0.759493	82.0616
KEGG_PATHWAY	bta05200:Pathways in cancer	11	2.42826	0.143201	ENSBTAG00000014541, ENSBTAG00000017685, ENSBTAG00000019241, ENSBTAG00000004322, ENSBTAG00000001061, ENSBTAG00000002699, ENSBTAG00000007173, ENSBTAG00000008353, ENSBTAG00000014127, ENSBTAG00000014400, ENSBTAG00000003835	100	204	2949	1.59015	1	0.739046	82.7062
Annotation Cluster 15; Enrichment Score: 1.1
Category	Term	Count	%	PValue	Genes	List Total	Pop Hits	Pop Total	Fold Enrichment	Bonferroni	Benjamini	FDR
GOTERM_BP_FAT	GO:0016044~membrane organization	8	1.766	0.0398931	ENSBTAG00000004588, ENSBTAG00000002885, ENSBTAG00000017574, ENSBTAG00000003506, ENSBTAG00000016152, ENSBTAG00000014546, ENSBTAG00000009012, ENSBTAG00000002006	162	99	4989	2.48859	1	0.883378	48.2687
GOTERM_BP_FAT	GO:0006897~endocytosis	6	1.3245	0.0458813	ENSBTAG00000002885, ENSBTAG00000003506, ENSBTAG00000016152, ENSBTAG00000014546, ENSBTAG00000009012, ENSBTAG00000002006	162	61	4989	3.02914	1	0.89779	53.252
GOTERM_BP_FAT	GO:0010324~membrane invagination	6	1.3245	0.0458813	ENSBTAG00000002885, ENSBTAG00000003506, ENSBTAG00000016152, ENSBTAG00000014546, ENSBTAG00000009012, ENSBTAG00000002006	162	61	4989	3.02914	1	0.89779	53.252
GOTERM_BP_FAT	GO:0016192~vesicle-mediated transport	7	1.54525	0.641812	ENSBTAG00000002885, ENSBTAG00000003506, ENSBTAG00000014603, ENSBTAG00000016152, ENSBTAG00000014546, ENSBTAG00000009012, ENSBTAG00000002006	162	202	4989	1.0672	1	0.999996	100
Annotation Cluster 16; Enrichment Score: 0.9
Category	Term	Count	%	PValue	Genes	List Total	Pop Hits	Pop Total	Fold Enrichment	Bonferroni	Benjamini	FDR
GOTERM_BP_FAT	GO:0042127~regulation of cell proliferation	16	3.53201	0.000460141	ENSBTAG00000015345, ENSBTAG00000004869, ENSBTAG00000001061, ENSBTAG00000010532, ENSBTAG00000002006, ENSBTAG00000014541, ENSBTAG00000002835, ENSBTAG00000008483, ENSBTAG00000007421, ENSBTAG00000006716, ENSBTAG00000002699, ENSBTAG00000019612, ENSBTAG00000008353, ENSBTAG00000014127, ENSBTAG00000013569, ENSBTAG00000003835	162	175	4989	2.81566	0.42807	0.0889188	0.742371
GOTERM_BP_FAT	GO:0008285~negative regulation of cell proliferation	9	1.98675	0.00223154	ENSBTAG00000002835, ENSBTAG00000015345, ENSBTAG00000004869, ENSBTAG00000007421, ENSBTAG00000001061, ENSBTAG00000019612, ENSBTAG00000008353, ENSBTAG00000003835, ENSBTAG00000002006	162	73	4989	3.7968	0.933604	0.260178	3.55227
KEGG_PATHWAY	bta05200:Pathways in cancer	11	2.42826	0.143201	ENSBTAG00000014541, ENSBTAG00000017685, ENSBTAG00000019241, ENSBTAG00000004322, ENSBTAG00000001061, ENSBTAG00000002699, ENSBTAG00000007173, ENSBTAG00000008353, ENSBTAG00000014127, ENSBTAG00000014400, ENSBTAG00000003835	100	204	2949	1.59015	1	0.739046	82.7062
GOTERM_BP_FAT	GO:0042325~regulation of phosphorylation	7	1.54525	0.195257	ENSBTAG00000004394, ENSBTAG00000014541, ENSBTAG00000001061, ENSBTAG00000002699, ENSBTAG00000008353, ENSBTAG00000003835, ENSBTAG00000002006	162	121	4989	1.7816	1	0.996763	97.0311
GOTERM_BP_FAT	GO:0032268~regulation of cellular protein metabolic process	7	1.54525	0.205346	ENSBTAG00000014541, ENSBTAG00000001061, ENSBTAG00000019612, ENSBTAG00000003901, ENSBTAG00000007223, ENSBTAG00000003835, ENSBTAG00000002006	162	123	4989	1.75263	1	0.997012	97.5796
GOTERM_BP_FAT	GO:0051174~regulation of phosphorus metabolic process	7	1.54525	0.21562	ENSBTAG00000004394, ENSBTAG00000014541, ENSBTAG00000001061, ENSBTAG00000002699, ENSBTAG00000008353, ENSBTAG00000003835, ENSBTAG00000002006	162	125	4989	1.72459	1	0.997251	98.0394
GOTERM_BP_FAT	GO:0019220~regulation of phosphate metabolic process	7	1.54525	0.21562	ENSBTAG00000004394, ENSBTAG00000014541, ENSBTAG00000001061, ENSBTAG00000002699, ENSBTAG00000008353, ENSBTAG00000003835, ENSBTAG00000002006	162	125	4989	1.72459	1	0.997251	98.0394
GOTERM_BP_FAT	GO:0010604~positive regulation of macromolecule metabolic process	10	2.20751	0.23214	ENSBTAG00000032132, ENSBTAG00000014541, ENSBTAG00000002835, ENSBTAG00000004322, ENSBTAG00000008313, ENSBTAG00000001061, ENSBTAG00000002699, ENSBTAG00000003901, ENSBTAG00000003835, ENSBTAG00000002006	162	209	4989	1.47351	1	0.997063	98.611
GOTERM_BP_FAT	GO:0045859~regulation of protein kinase activity	5	1.10375	0.272067	ENSBTAG00000004394, ENSBTAG00000001061, ENSBTAG00000002699, ENSBTAG00000008353, ENSBTAG00000002006	162	82	4989	1.87782	1	0.997344	99.4149
GOTERM_BP_FAT	GO:0043549~regulation of kinase activity	5	1.10375	0.315932	ENSBTAG00000004394, ENSBTAG00000001061, ENSBTAG00000002699, ENSBTAG00000008353, ENSBTAG00000002006	162	88	4989	1.74979	1	0.998342	99.7861
GOTERM_BP_FAT	GO:0051338~regulation of transferase activity	5	1.10375	0.330712	ENSBTAG00000004394, ENSBTAG00000001061, ENSBTAG00000002699, ENSBTAG00000008353, ENSBTAG00000002006	162	90	4989	1.71091	1	0.998496	99.8498
GOTERM_BP_FAT	GO:0007243~protein kinase cascade	4	0.883002	0.472149	ENSBTAG00000002835, ENSBTAG00000001061, ENSBTAG00000002699, ENSBTAG00000002006	162	79	4989	1.55931	1	0.999819	99.9968
GOTERM_BP_FAT	GO:0010941~regulation of cell death	6	1.3245	0.859843	ENSBTAG00000012567, ENSBTAG00000001061, ENSBTAG00000002699, ENSBTAG00000008353, ENSBTAG00000008625, ENSBTAG00000003835	162	225	4989	0.821235	1	1	100
GOTERM_BP_FAT	GO:0007242~intracellular signaling cascade	9	1.98675	0.891286	ENSBTAG00000038974, ENSBTAG00000002835, ENSBTAG00000008483, ENSBTAG00000016739, ENSBTAG00000001497, ENSBTAG00000001061, ENSBTAG00000002699, ENSBTAG00000015837, ENSBTAG00000002006	162	352	4989	0.787405	1	1	100
Annotation Cluster 17; Enrichment Score: 0.8
Category	Term	Count	%	PValue	Genes	List Total	Pop Hits	Pop Total	Fold Enrichment	Bonferroni	Benjamini	FDR
SP_PIR_KEYWORDS	calcium	16	3.53201	0.000103507	ENSBTAG00000013245, ENSBTAG00000016208, ENSBTAG00000001580, ENSBTAG00000001061, ENSBTAG00000023416, ENSBTAG00000008542, ENSBTAG00000020178, ENSBTAG00000002006, ENSBTAG00000020554, ENSBTAG00000021565, ENSBTAG00000009836, ENSBTAG00000007421, ENSBTAG00000018499, ENSBTAG00000012338, ENSBTAG00000000512, ENSBTAG00000016343	155	162	5056	3.22166	0.0233246	0.00470905	0.132435
GOTERM_MF_FAT	GO:0005509~calcium ion binding	18	3.97351	0.00125482	ENSBTAG00000013245, ENSBTAG00000016208, ENSBTAG00000001580, ENSBTAG00000001801, ENSBTAG00000001061, ENSBTAG00000023416, ENSBTAG00000008542, ENSBTAG00000020178, ENSBTAG00000025642, ENSBTAG00000002006, ENSBTAG00000020554, ENSBTAG00000021565, ENSBTAG00000009836, ENSBTAG00000007421, ENSBTAG00000018499, ENSBTAG00000012338, ENSBTAG00000000512, ENSBTAG00000016343	161	242	5145	2.37693	0.364457	0.0550841	1.71037
GOTERM_MF_FAT	GO:0043167~ion binding	44	9.71302	0.724454	ENSBTAG00000016208, ENSBTAG00000014861, ENSBTAG00000020602, ENSBTAG00000001801, ENSBTAG00000001061, ENSBTAG00000011182, ENSBTAG00000008542, ENSBTAG00000037644, ENSBTAG00000003901, ENSBTAG00000016761, ENSBTAG00000015743, ENSBTAG00000010244, ENSBTAG00000002006, ENSBTAG00000021565, ENSBTAG00000013496, ENSBTAG00000003763, ENSBTAG00000007421, ENSBTAG00000006716, ENSBTAG00000012338, ENSBTAG00000016343,…	161	1476	5145	0.952633	1	0.999985	100
GOTERM_MF_FAT	GO:0043169~cation binding	43	9.49227	0.768184	ENSBTAG00000016208, ENSBTAG00000014861, ENSBTAG00000020602, ENSBTAG00000001801, ENSBTAG00000001061, ENSBTAG00000011182, ENSBTAG00000008542, ENSBTAG00000037644, ENSBTAG00000003901, ENSBTAG00000016761, ENSBTAG00000015743, ENSBTAG00000002006, ENSBTAG00000021565, ENSBTAG00000013496, ENSBTAG00000003763, ENSBTAG00000007421, ENSBTAG00000006716, ENSBTAG00000012338, ENSBTAG00000016343, ENSBTAG00000013245,…	161	1468	5145	0.936056	1	0.999995	100
GOTERM_MF_FAT	GO:0046872~metal ion binding	42	9.27152	0.789517	ENSBTAG00000016208, ENSBTAG00000014861, ENSBTAG00000020602, ENSBTAG00000001801, ENSBTAG00000001061, ENSBTAG00000011182, ENSBTAG00000008542, ENSBTAG00000037644, ENSBTAG00000003901, ENSBTAG00000016761, ENSBTAG00000015743, ENSBTAG00000002006, ENSBTAG00000021565, ENSBTAG00000013496, ENSBTAG00000003763, ENSBTAG00000007421, ENSBTAG00000006716, ENSBTAG00000012338, ENSBTAG00000016343, ENSBTAG00000013245,…	161	1448	5145	0.926916	1	0.999997	100
SP_PIR_KEYWORDS	metal-binding	15	3.31126	0.98912	ENSBTAG00000016208, ENSBTAG00000038706, ENSBTAG00000001061, ENSBTAG00000011182, ENSBTAG00000037644, ENSBTAG00000020178, ENSBTAG00000015743, ENSBTAG00000026501, ENSBTAG00000008625, ENSBTAG00000021565, ENSBTAG00000004247, ENSBTAG00000006716, ENSBTAG00000012338, ENSBTAG00000014127, ENSBTAG00000008943	155	754	5056	0.648926	1	1	100
GOTERM_MF_FAT	GO:0046914~transition metal ion binding	21	4.63576	0.998604	ENSBTAG00000020602, ENSBTAG00000001061, ENSBTAG00000011182, ENSBTAG00000037644, ENSBTAG00000016761, ENSBTAG00000003901, ENSBTAG00000026501, ENSBTAG00000008625, ENSBTAG00000005017, ENSBTAG00000013496, ENSBTAG00000003763, ENSBTAG00000005015, ENSBTAG00000007917, ENSBTAG00000004247, ENSBTAG00000006716, ENSBTAG00000008313, ENSBTAG00000019612, ENSBTAG00000003506, ENSBTAG00000014127, ENSBTAG00000016496,…	161	1090	5145	0.615676	1	1	100
SP_PIR_KEYWORDS	zinc	5	1.10375	0.999948	ENSBTAG00000004247, ENSBTAG00000001061, ENSBTAG00000011182, ENSBTAG00000008943, ENSBTAG00000008625	155	518	5056	0.314859	1	1	100
GOTERM_MF_FAT	GO:0008270~zinc ion binding	12	2.64901	0.999975	ENSBTAG00000005017, ENSBTAG00000003763, ENSBTAG00000013496, ENSBTAG00000007917, ENSBTAG00000004247, ENSBTAG00000008313, ENSBTAG00000001061, ENSBTAG00000011182, ENSBTAG00000003901, ENSBTAG00000016496, ENSBTAG00000008943, ENSBTAG00000008625	161	892	5145	0.429908	1	1	100
Annotation Cluster 18; Enrichment Score: 0.7
Category	Term	Count	%	PValue	Genes	List Total	Pop Hits	Pop Total	Fold Enrichment	Bonferroni	Benjamini	FDR
GOTERM_MF_FAT	GO:0020037~heme binding	5	1.10375	0.0318214	ENSBTAG00000020602, ENSBTAG00000006716, ENSBTAG00000037644, ENSBTAG00000026501, ENSBTAG00000014127	161	39	5145	4.09699	0.999991	0.477208	35.8742
GOTERM_MF_FAT	GO:0046906~tetrapyrrole binding	5	1.10375	0.0466598	ENSBTAG00000020602, ENSBTAG00000006716, ENSBTAG00000037644, ENSBTAG00000026501, ENSBTAG00000014127	161	44	5145	3.63142	1	0.577891	48.1353
SP_PIR_KEYWORDS	heme	4	0.883002	0.107939	ENSBTAG00000006716, ENSBTAG00000037644, ENSBTAG00000026501, ENSBTAG00000014127	155	38	5056	3.43362	1	0.677701	76.8301
GOTERM_MF_FAT	GO:0005506~iron ion binding	8	1.766	0.109171	ENSBTAG00000005015, ENSBTAG00000020602, ENSBTAG00000006716, ENSBTAG00000037644, ENSBTAG00000016761, ENSBTAG00000003506, ENSBTAG00000026501, ENSBTAG00000014127	161	130	5145	1.96656	1	0.837074	79.5737
SP_PIR_KEYWORDS	iron	5	1.10375	0.405094	ENSBTAG00000005015, ENSBTAG00000006716, ENSBTAG00000037644, ENSBTAG00000026501, ENSBTAG00000014127	155	106	5056	1.53865	1	0.975286	99.8705
SP_PIR_KEYWORDS	metal-binding	15	3.31126	0.98912	ENSBTAG00000016208, ENSBTAG00000038706, ENSBTAG00000001061, ENSBTAG00000011182, ENSBTAG00000037644, ENSBTAG00000020178, ENSBTAG00000015743, ENSBTAG00000026501, ENSBTAG00000008625, ENSBTAG00000021565, ENSBTAG00000004247, ENSBTAG00000006716, ENSBTAG00000012338, ENSBTAG00000014127, ENSBTAG00000008943	155	754	5056	0.648926	1	1	100
GOTERM_MF_FAT	GO:0046914~transition metal ion binding	21	4.63576	0.998604	ENSBTAG00000020602, ENSBTAG00000001061, ENSBTAG00000011182, ENSBTAG00000037644, ENSBTAG00000016761, ENSBTAG00000003901, ENSBTAG00000026501, ENSBTAG00000008625, ENSBTAG00000005017, ENSBTAG00000013496, ENSBTAG00000003763, ENSBTAG00000005015, ENSBTAG00000007917, ENSBTAG00000004247, ENSBTAG00000006716, ENSBTAG00000008313, ENSBTAG00000019612, ENSBTAG00000003506, ENSBTAG00000014127, ENSBTAG00000016496,…	161	1090	5145	0.615676	1	1	100
Annotation Cluster 19; Enrichment Score: 0.7
Category	Term	Count	%	PValue	Genes	List Total	Pop Hits	Pop Total	Fold Enrichment	Bonferroni	Benjamini	FDR
GOTERM_BP_FAT	GO:0002684~positive regulation of immune system process	8	1.766	0.0565951	ENSBTAG00000020602, ENSBTAG00000031430, ENSBTAG00000010303, ENSBTAG00000007450, ENSBTAG00000008353, ENSBTAG00000014546, ENSBTAG00000013569, ENSBTAG00000002006	162	107	4989	2.30253	1	0.92002	61.063
GOTERM_CC_FAT	GO:0009986~cell surface	7	1.54525	0.148196	ENSBTAG00000014541, ENSBTAG00000002699, ENSBTAG00000031430, ENSBTAG00000010303, ENSBTAG00000014546, ENSBTAG00000013569, ENSBTAG00000002006	149	93	3834	1.93678	1	0.7675	86.4023
GOTERM_CC_FAT	GO:0009897~external side of plasma membrane	5	1.10375	0.176303	ENSBTAG00000002699, ENSBTAG00000031430, ENSBTAG00000010303, ENSBTAG00000014546, ENSBTAG00000002006	149	57	3834	2.25715	1	0.786376	91.0423
GOTERM_BP_FAT	GO:0050865~regulation of cell activation	5	1.10375	0.222508	ENSBTAG00000014541, ENSBTAG00000031430, ENSBTAG00000008353, ENSBTAG00000013569, ENSBTAG00000002006	162	75	4989	2.05309	1	0.996864	98.3003
GOTERM_BP_FAT	GO:0002696~positive regulation of leukocyte activation	4	0.883002	0.278917	ENSBTAG00000031430, ENSBTAG00000008353, ENSBTAG00000013569, ENSBTAG00000002006	162	57	4989	2.16114	1	0.997558	99.4979
GOTERM_BP_FAT	GO:0050867~positive regulation of cell activation	4	0.883002	0.296689	ENSBTAG00000031430, ENSBTAG00000008353, ENSBTAG00000013569, ENSBTAG00000002006	162	59	4989	2.08788	1	0.998133	99.6648
GOTERM_BP_FAT	GO:0002694~regulation of leukocyte activation	4	0.883002	0.412147	ENSBTAG00000031430, ENSBTAG00000008353, ENSBTAG00000013569, ENSBTAG00000002006	162	72	4989	1.71091	1	0.999616	99.9816
Annotation Cluster 20; Enrichment Score: 0.7
Category	Term	Count	%	PValue	Genes	List Total	Pop Hits	Pop Total	Fold Enrichment	Bonferroni	Benjamini	FDR
GOTERM_BP_FAT	GO:0032269~negative regulation of cellular protein metabolic process	4	0.883002	0.137382	ENSBTAG00000001061, ENSBTAG00000019612, ENSBTAG00000003901, ENSBTAG00000002006	162	40	4989	3.07963	1	0.994891	90.8609
GOTERM_BP_FAT	GO:0051248~negative regulation of protein metabolic process	4	0.883002	0.144919	ENSBTAG00000001061, ENSBTAG00000019612, ENSBTAG00000003901, ENSBTAG00000002006	162	41	4989	3.00452	1	0.995618	92.0714
GOTERM_BP_FAT	GO:0032270~positive regulation of cellular protein metabolic process	4	0.883002	0.201017	ENSBTAG00000001061, ENSBTAG00000003901, ENSBTAG00000003835, ENSBTAG00000002006	162	48	4989	2.56636	1	0.996962	97.3571
GOTERM_BP_FAT	GO:0032268~regulation of cellular protein metabolic process	7	1.54525	0.205346	ENSBTAG00000014541, ENSBTAG00000001061, ENSBTAG00000019612, ENSBTAG00000003901, ENSBTAG00000007223, ENSBTAG00000003835, ENSBTAG00000002006	162	123	4989	1.75263	1	0.997012	97.5796
GOTERM_BP_FAT	GO:0051247~positive regulation of protein metabolic process	4	0.883002	0.226461	ENSBTAG00000001061, ENSBTAG00000003901, ENSBTAG00000003835, ENSBTAG00000002006	162	51	4989	2.4154	1	0.996889	98.435
GOTERM_BP_FAT	GO:0010604~positive regulation of macromolecule metabolic process	10	2.20751	0.23214	ENSBTAG00000032132, ENSBTAG00000014541, ENSBTAG00000002835, ENSBTAG00000004322, ENSBTAG00000008313, ENSBTAG00000001061, ENSBTAG00000002699, ENSBTAG00000003901, ENSBTAG00000003835, ENSBTAG00000002006	162	209	4989	1.47351	1	0.997063	98.611
GOTERM_BP_FAT	GO:0010605~negative regulation of macromolecule metabolic process	7	1.54525	0.527738	ENSBTAG00000001061, ENSBTAG00000019612, ENSBTAG00000003901, ENSBTAG00000002333, ENSBTAG00000003835, ENSBTAG00000012036, ENSBTAG00000002006	162	180	4989	1.19763	1	0.999931	99.9995
Annotation Cluster 21; Enrichment Score: 0.7
Category	Term	Count	%	PValue	Genes	List Total	Pop Hits	Pop Total	Fold Enrichment	Bonferroni	Benjamini	FDR
GOTERM_BP_FAT	GO:0006633~fatty acid biosynthetic process	4	0.883002	0.0953647	ENSBTAG00000012855, ENSBTAG00000009737, ENSBTAG00000006716, ENSBTAG00000014127	162	34	4989	3.62309	1	0.984938	80.2619
GOTERM_BP_FAT	GO:0008610~lipid biosynthetic process	7	1.54525	0.17568	ENSBTAG00000012855, ENSBTAG00000009737, ENSBTAG00000025161, ENSBTAG00000006716, ENSBTAG00000019612, ENSBTAG00000005069, ENSBTAG00000014127	162	117	4989	1.84251	1	0.996244	95.6188
GOTERM_BP_FAT	GO:0006631~fatty acid metabolic process	5	1.10375	0.243469	ENSBTAG00000012855, ENSBTAG00000009737, ENSBTAG00000006716, ENSBTAG00000016048, ENSBTAG00000014127	162	78	4989	1.97412	1	0.996789	98.9081
GOTERM_BP_FAT	GO:0016053~organic acid biosynthetic process	4	0.883002	0.368059	ENSBTAG00000012855, ENSBTAG00000009737, ENSBTAG00000006716, ENSBTAG00000014127	162	67	4989	1.83858	1	0.999135	99.9407
GOTERM_BP_FAT	GO:0046394~carboxylic acid biosynthetic process	4	0.883002	0.368059	ENSBTAG00000012855, ENSBTAG00000009737, ENSBTAG00000006716, ENSBTAG00000014127	162	67	4989	1.83858	1	0.999135	99.9407
Annotation Cluster 22; Enrichment Score: 0.6
Category	Term	Count	%	PValue	Genes	List Total	Pop Hits	Pop Total	Fold Enrichment	Bonferroni	Benjamini	FDR
INTERPRO	IPR002347:Glucose/ribitol dehydrogenase	4	0.883002	0.0908749	ENSBTAG00000020729, ENSBTAG00000016867, ENSBTAG00000011927, ENSBTAG00000001793	195	35	6326	3.70755	1	0.860632	73.4317
INTERPRO	IPR002198:Short-chain dehydrogenase/reductase SDR	4	0.883002	0.123086	ENSBTAG00000020729, ENSBTAG00000016867, ENSBTAG00000011927, ENSBTAG00000001793	195	40	6326	3.2441	1	0.924298	83.9156
SP_PIR_KEYWORDS	oxidoreductase	11	2.42826	0.23738	ENSBTAG00000039555, ENSBTAG00000020729, ENSBTAG00000006716, ENSBTAG00000016867, ENSBTAG00000012128, ENSBTAG00000005069, ENSBTAG00000015743, ENSBTAG00000026501, ENSBTAG00000014127, ENSBTAG00000011927, ENSBTAG00000001793	155	252	5056	1.42386	1	0.889934	96.8865
GOTERM_BP_FAT	GO:0055114~oxidation reduction	12	2.64901	0.46386	ENSBTAG00000020729, ENSBTAG00000012023, ENSBTAG00000006716, ENSBTAG00000016867, ENSBTAG00000012128, ENSBTAG00000016761, ENSBTAG00000005069, ENSBTAG00000015743, ENSBTAG00000026501, ENSBTAG00000014127, ENSBTAG00000011927, ENSBTAG00000001793	162	321	4989	1.15126	1	0.999797	99.9959
INTERPRO	IPR016040:NAD(P)-binding domain	4	0.883002	0.583247	ENSBTAG00000020729, ENSBTAG00000016867, ENSBTAG00000011927, ENSBTAG00000001793	195	98	6326	1.32412	1	1	99.9995
Annotation Cluster 23; Enrichment Score: 0.6
Category	Term	Count	%	PValue	Genes	List Total	Pop Hits	Pop Total	Fold Enrichment	Bonferroni	Benjamini	FDR
GOTERM_CC_FAT	GO:0042598~vesicular fraction	6	1.3245	0.0282386	ENSBTAG00000013245, ENSBTAG00000006716, ENSBTAG00000003506, ENSBTAG00000026501, ENSBTAG00000010244, ENSBTAG00000014127	149	45	3834	3.43087	0.995794	0.343518	29.9756
UP_SEQ_FEATURE	active site:Proton acceptor	10	2.20751	0.0365374	ENSBTAG00000009737, ENSBTAG00000006716, ENSBTAG00000001061, ENSBTAG00000012338, ENSBTAG00000002699, ENSBTAG00000019612, ENSBTAG00000016048, ENSBTAG00000014127, ENSBTAG00000011927, ENSBTAG00000001793	117	157	4012	2.18411	1	0.800451	40.8537
GOTERM_CC_FAT	GO:0005792~microsome	5	1.10375	0.0879523	ENSBTAG00000013245, ENSBTAG00000006716, ENSBTAG00000026501, ENSBTAG00000010244, ENSBTAG00000014127	149	44	3834	2.92404	1	0.62352	68.1843
GOTERM_MF_FAT	GO:0005506~iron ion binding	8	1.766	0.109171	ENSBTAG00000005015, ENSBTAG00000020602, ENSBTAG00000006716, ENSBTAG00000037644, ENSBTAG00000016761, ENSBTAG00000003506, ENSBTAG00000026501, ENSBTAG00000014127	161	130	5145	1.96656	1	0.837074	79.5737
GOTERM_CC_FAT	GO:0019898~extrinsic to membrane	8	1.766	0.154261	ENSBTAG00000017685, ENSBTAG00000019712, ENSBTAG00000006716, ENSBTAG00000001061, ENSBTAG00000017063, ENSBTAG00000026501, ENSBTAG00000014127, ENSBTAG00000011927	149	115	3834	1.79002	1	0.766503	87.5587
GOTERM_CC_FAT	GO:0005624~membrane fraction	9	1.98675	0.185696	ENSBTAG00000013245, ENSBTAG00000006716, ENSBTAG00000001061, ENSBTAG00000003506, ENSBTAG00000014603, ENSBTAG00000026501, ENSBTAG00000013569, ENSBTAG00000010244, ENSBTAG00000014127	149	143	3834	1.61947	1	0.791834	92.2333
GOTERM_CC_FAT	GO:0005626~insoluble fraction	9	1.98675	0.210738	ENSBTAG00000013245, ENSBTAG00000006716, ENSBTAG00000001061, ENSBTAG00000003506, ENSBTAG00000014603, ENSBTAG00000026501, ENSBTAG00000013569, ENSBTAG00000010244, ENSBTAG00000014127	149	148	3834	1.56476	1	0.812528	94.7339
SP_PIR_KEYWORDS	oxidoreductase	11	2.42826	0.23738	ENSBTAG00000039555, ENSBTAG00000020729, ENSBTAG00000006716, ENSBTAG00000016867, ENSBTAG00000012128, ENSBTAG00000005069, ENSBTAG00000015743, ENSBTAG00000026501, ENSBTAG00000014127, ENSBTAG00000011927, ENSBTAG00000001793	155	252	5056	1.42386	1	0.889934	96.8865
GOTERM_CC_FAT	GO:0000267~cell fraction	9	1.98675	0.327535	ENSBTAG00000013245, ENSBTAG00000006716, ENSBTAG00000001061, ENSBTAG00000003506, ENSBTAG00000014603, ENSBTAG00000026501, ENSBTAG00000013569, ENSBTAG00000010244, ENSBTAG00000014127	149	169	3834	1.37032	1	0.926718	99.2817
GOTERM_BP_FAT	GO:0055114~oxidation reduction	12	2.64901	0.46386	ENSBTAG00000020729, ENSBTAG00000012023, ENSBTAG00000006716, ENSBTAG00000016867, ENSBTAG00000012128, ENSBTAG00000016761, ENSBTAG00000005069, ENSBTAG00000015743, ENSBTAG00000026501, ENSBTAG00000014127, ENSBTAG00000011927, ENSBTAG00000001793	162	321	4989	1.15126	1	0.999797	99.9959
GOTERM_CC_FAT	GO:0031410~cytoplasmic vesicle	8	1.766	0.578488	ENSBTAG00000013245, ENSBTAG00000009836, ENSBTAG00000004247, ENSBTAG00000001801, ENSBTAG00000005574, ENSBTAG00000003506, ENSBTAG00000014603, ENSBTAG00000010244	149	185	3834	1.11272	1	0.995121	99.9978
GOTERM_CC_FAT	GO:0031982~vesicle	8	1.766	0.618542	ENSBTAG00000013245, ENSBTAG00000009836, ENSBTAG00000004247, ENSBTAG00000001801, ENSBTAG00000005574, ENSBTAG00000003506, ENSBTAG00000014603, ENSBTAG00000010244	149	192	3834	1.07215	1	0.996825	99.9994
SP_PIR_KEYWORDS	endoplasmic reticulum	7	1.54525	0.664002	ENSBTAG00000013245, ENSBTAG00000001580, ENSBTAG00000009737, ENSBTAG00000006716, ENSBTAG00000005069, ENSBTAG00000026501, ENSBTAG00000014127	155	219	5056	1.04263	1	0.998794	99.9999
GOTERM_CC_FAT	GO:0016023~cytoplasmic membrane-bounded vesicle	6	1.3245	0.701652	ENSBTAG00000009836, ENSBTAG00000004247, ENSBTAG00000001801, ENSBTAG00000005574, ENSBTAG00000003506, ENSBTAG00000010244	149	151	3834	1.02245	1	0.99888	100
GOTERM_CC_FAT	GO:0031988~membrane-bounded vesicle	6	1.3245	0.728696	ENSBTAG00000009836, ENSBTAG00000004247, ENSBTAG00000001801, ENSBTAG00000005574, ENSBTAG00000003506, ENSBTAG00000010244	149	156	3834	0.989675	1	0.999013	100
GOTERM_CC_FAT	GO:0005783~endoplasmic reticulum	10	2.20751	0.920012	ENSBTAG00000013245, ENSBTAG00000001580, ENSBTAG00000009737, ENSBTAG00000006349, ENSBTAG00000025161, ENSBTAG00000006716, ENSBTAG00000005069, ENSBTAG00000026501, ENSBTAG00000014127, ENSBTAG00000011927	149	340	3834	0.75681	1	0.999996	100
Annotation Cluster 24; Enrichment Score: 0.6
Category	Term	Count	%	PValue	Genes	List Total	Pop Hits	Pop Total	Fold Enrichment	Bonferroni	Benjamini	FDR
GOTERM_CC_FAT	GO:0042995~cell projection	9	1.98675	0.162056	ENSBTAG00000020554, ENSBTAG00000013078, ENSBTAG00000014541, ENSBTAG00000001801, ENSBTAG00000024426, ENSBTAG00000005078, ENSBTAG00000019612, ENSBTAG00000010244, ENSBTAG00000007223	149	138	3834	1.67814	1	0.769671	88.9124
GOTERM_BP_FAT	GO:0030036~actin cytoskeleton organization	4	0.883002	0.296689	ENSBTAG00000020554, ENSBTAG00000014541, ENSBTAG00000024426, ENSBTAG00000019612	162	59	4989	2.08788	1	0.998133	99.6648
GOTERM_BP_FAT	GO:0030029~actin filament-based process	4	0.883002	0.305604	ENSBTAG00000020554, ENSBTAG00000014541, ENSBTAG00000024426, ENSBTAG00000019612	162	60	4989	2.05309	1	0.998366	99.7273
GOTERM_BP_FAT	GO:0007010~cytoskeleton organization	6	1.3245	0.306855	ENSBTAG00000038974, ENSBTAG00000020554, ENSBTAG00000014541, ENSBTAG00000024426, ENSBTAG00000019822, ENSBTAG00000019612	162	114	4989	1.62086	1	0.998264	99.7352
Annotation Cluster 25; Enrichment Score: 0.6
Category	Term	Count	%	PValue	Genes	List Total	Pop Hits	Pop Total	Fold Enrichment	Bonferroni	Benjamini	FDR
GOTERM_BP_FAT	GO:0006928~cell motion	6	1.3245	0.159032	ENSBTAG00000015434, ENSBTAG00000013078, ENSBTAG00000001061, ENSBTAG00000002699, ENSBTAG00000011961, ENSBTAG00000010303	162	89	4989	2.07615	1	0.996047	93.9441
GOTERM_BP_FAT	GO:0048870~cell motility	5	1.10375	0.264858	ENSBTAG00000013078, ENSBTAG00000001061, ENSBTAG00000002699, ENSBTAG00000011961, ENSBTAG00000010303	162	81	4989	1.90101	1	0.997339	99.3136
GOTERM_BP_FAT	GO:0051674~localization of cell	5	1.10375	0.264858	ENSBTAG00000013078, ENSBTAG00000001061, ENSBTAG00000002699, ENSBTAG00000011961, ENSBTAG00000010303	162	81	4989	1.90101	1	0.997339	99.3136
GOTERM_BP_FAT	GO:0016477~cell migration	4	0.883002	0.438159	ENSBTAG00000001061, ENSBTAG00000002699, ENSBTAG00000011961, ENSBTAG00000010303	162	75	4989	1.64247	1	0.999735	99.9912
Annotation Cluster 26; Enrichment Score: 0.6
Category	Term	Count	%	PValue	Genes	List Total	Pop Hits	Pop Total	Fold Enrichment	Bonferroni	Benjamini	FDR
GOTERM_CC_FAT	GO:0044430~cytoskeletal part	15	3.31126	0.0547831	ENSBTAG00000004472, ENSBTAG00000013078, ENSBTAG00000030973, ENSBTAG00000010244, ENSBTAG00000008291, ENSBTAG00000003763, ENSBTAG00000020554, ENSBTAG00000015434, ENSBTAG00000007904, ENSBTAG00000012030, ENSBTAG00000020824, ENSBTAG00000024426, ENSBTAG00000017574, ENSBTAG00000017564, ENSBTAG00000022461	149	228	3834	1.69286	0.999979	0.511984	50.3835
GOTERM_CC_FAT	GO:0005856~cytoskeleton	20	4.41501	0.0727752	ENSBTAG00000004472, ENSBTAG00000013078, ENSBTAG00000030973, ENSBTAG00000011182, ENSBTAG00000010244, ENSBTAG00000008291, ENSBTAG00000003763, ENSBTAG00000020554, ENSBTAG00000015434, ENSBTAG00000017685, ENSBTAG00000007904, ENSBTAG00000012030, ENSBTAG00000020824, ENSBTAG00000024426, ENSBTAG00000017574, ENSBTAG00000017564, ENSBTAG00000000512, ENSBTAG00000017063, ENSBTAG00000022461, ENSBTAG00000018071	149	347	3834	1.48309	0.999999	0.594238	60.9338
GOTERM_CC_FAT	GO:0015629~actin cytoskeleton	6	1.3245	0.0846932	ENSBTAG00000020554, ENSBTAG00000003763, ENSBTAG00000015434, ENSBTAG00000024426, ENSBTAG00000017564, ENSBTAG00000010244	149	61	3834	2.53097	1	0.63001	66.7408
SP_PIR_KEYWORDS	cytoskeleton	8	1.766	0.180174	ENSBTAG00000017685, ENSBTAG00000012030, ENSBTAG00000019822, ENSBTAG00000011182, ENSBTAG00000000512, ENSBTAG00000022461, ENSBTAG00000010244, ENSBTAG00000018071	155	152	5056	1.71681	1	0.824851	92.14
GOTERM_CC_FAT	GO:0015630~microtubule cytoskeleton	6	1.3245	0.803336	ENSBTAG00000004472, ENSBTAG00000013078, ENSBTAG00000012030, ENSBTAG00000030973, ENSBTAG00000010244, ENSBTAG00000008291	149	172	3834	0.897612	1	0.999774	100
GOTERM_CC_FAT	GO:0043228~non-membrane-bounded organelle	26	5.73951	0.899377	ENSBTAG00000004472, ENSBTAG00000013078, ENSBTAG00000030973, ENSBTAG00000011182, ENSBTAG00000003901, ENSBTAG00000010244, ENSBTAG00000008291, ENSBTAG00000008545, ENSBTAG00000015434, ENSBTAG00000002655, ENSBTAG00000003763, ENSBTAG00000007904, ENSBTAG00000024426, ENSBTAG00000017574, ENSBTAG00000022461, ENSBTAG00000018071, ENSBTAG00000013245, ENSBTAG00000020554, ENSBTAG00000012567, ENSBTAG00000017685,…	149	793	3834	0.843657	1	0.99999	100
GOTERM_CC_FAT	GO:0043232~intracellular non-membrane-bounded organelle	26	5.73951	0.899377	ENSBTAG00000004472, ENSBTAG00000013078, ENSBTAG00000030973, ENSBTAG00000011182, ENSBTAG00000003901, ENSBTAG00000010244, ENSBTAG00000008291, ENSBTAG00000008545, ENSBTAG00000015434, ENSBTAG00000002655, ENSBTAG00000003763, ENSBTAG00000007904, ENSBTAG00000024426, ENSBTAG00000017574, ENSBTAG00000022461, ENSBTAG00000018071, ENSBTAG00000013245, ENSBTAG00000020554, ENSBTAG00000012567, ENSBTAG00000017685,…	149	793	3834	0.843657	1	0.99999	100
SP_PIR_KEYWORDS	cytoplasm	16	3.53201	0.998702	ENSBTAG00000000795, ENSBTAG00000001061, ENSBTAG00000019822, ENSBTAG00000011182, ENSBTAG00000006035, ENSBTAG00000010244, ENSBTAG00000003454, ENSBTAG00000012567, ENSBTAG00000017685, ENSBTAG00000002835, ENSBTAG00000012030, ENSBTAG00000005078, ENSBTAG00000000512, ENSBTAG00000017045, ENSBTAG00000022461, ENSBTAG00000018071	155	910	5056	0.573527	1	1	100
Annotation Cluster 27; Enrichment Score: 0.3
Category	Term	Count	%	PValue	Genes	List Total	Pop Hits	Pop Total	Fold Enrichment	Bonferroni	Benjamini	FDR
GOTERM_BP_FAT	GO:0051056~regulation of small GTPase mediated signal transduction	6	1.3245	0.358403	ENSBTAG00000038974, ENSBTAG00000013245, ENSBTAG00000016739, ENSBTAG00000015539, ENSBTAG00000033137, ENSBTAG00000009679	162	122	4989	1.51457	1	0.999085	99.9242
GOTERM_MF_FAT	GO:0005085~guanyl-nucleotide exchange factor activity	4	0.883002	0.39762	ENSBTAG00000013245, ENSBTAG00000015539, ENSBTAG00000033137, ENSBTAG00000009679	161	73	5145	1.75104	1	0.996714	99.9055
GOTERM_MF_FAT	GO:0030695~GTPase regulator activity	6	1.3245	0.566257	ENSBTAG00000013245, ENSBTAG00000004247, ENSBTAG00000016739, ENSBTAG00000015539, ENSBTAG00000033137, ENSBTAG00000009679	161	161	5145	1.19093	1	0.999819	99.999
GOTERM_MF_FAT	GO:0060589~nucleoside-triphosphatase regulator activity	6	1.3245	0.599222	ENSBTAG00000013245, ENSBTAG00000004247, ENSBTAG00000016739, ENSBTAG00000015539, ENSBTAG00000033137, ENSBTAG00000009679	161	167	5145	1.14814	1	0.999866	99.9997
Annotation Cluster 28; Enrichment Score: 0.2
Category	Term	Count	%	PValue	Genes	List Total	Pop Hits	Pop Total	Fold Enrichment	Bonferroni	Benjamini	FDR
GOTERM_BP_FAT	GO:0007167~enzyme linked receptor protein signaling pathway	6	1.3245	0.159032	ENSBTAG00000014541, ENSBTAG00000002835, ENSBTAG00000004322, ENSBTAG00000002699, ENSBTAG00000007173, ENSBTAG00000003835	162	89	4989	2.07615	1	0.996047	93.9441
GOTERM_BP_FAT	GO:0010604~positive regulation of macromolecule metabolic process	10	2.20751	0.23214	ENSBTAG00000032132, ENSBTAG00000014541, ENSBTAG00000002835, ENSBTAG00000004322, ENSBTAG00000008313, ENSBTAG00000001061, ENSBTAG00000002699, ENSBTAG00000003901, ENSBTAG00000003835, ENSBTAG00000002006	162	209	4989	1.47351	1	0.997063	98.611
GOTERM_BP_FAT	GO:0010628~positive regulation of gene expression	7	1.54525	0.314586	ENSBTAG00000032132, ENSBTAG00000002835, ENSBTAG00000004322, ENSBTAG00000008313, ENSBTAG00000002699, ENSBTAG00000003901, ENSBTAG00000003835	162	143	4989	1.50751	1	0.998433	99.7792
GOTERM_BP_FAT	GO:0031328~positive regulation of cellular biosynthetic process	8	1.766	0.324625	ENSBTAG00000032132, ENSBTAG00000014541, ENSBTAG00000002835, ENSBTAG00000004322, ENSBTAG00000008313, ENSBTAG00000009012, ENSBTAG00000003835, ENSBTAG00000002006	162	173	4989	1.42411	1	0.998402	99.8261
GOTERM_BP_FAT	GO:0009891~positive regulation of biosynthetic process	8	1.766	0.33519	ENSBTAG00000032132, ENSBTAG00000014541, ENSBTAG00000002835, ENSBTAG00000004322, ENSBTAG00000008313, ENSBTAG00000009012, ENSBTAG00000003835, ENSBTAG00000002006	162	175	4989	1.40783	1	0.998528	99.8653
GOTERM_BP_FAT	GO:0051173~positive regulation of nitrogen compound metabolic process	7	1.54525	0.413505	ENSBTAG00000032132, ENSBTAG00000014541, ENSBTAG00000002835, ENSBTAG00000004322, ENSBTAG00000008313, ENSBTAG00000009012, ENSBTAG00000003835	162	160	4989	1.34734	1	0.999592	99.9823
GOTERM_BP_FAT	GO:0010557~positive regulation of macromolecule biosynthetic process	7	1.54525	0.459938	ENSBTAG00000032132, ENSBTAG00000014541, ENSBTAG00000002835, ENSBTAG00000004322, ENSBTAG00000008313, ENSBTAG00000003835, ENSBTAG00000002006	162	168	4989	1.28318	1	0.999815	99.9953
GOTERM_BP_FAT	GO:0045893~positive regulation of transcription, DNA-dependent	5	1.10375	0.484344	ENSBTAG00000032132, ENSBTAG00000002835, ENSBTAG00000004322, ENSBTAG00000008313, ENSBTAG00000003835	162	111	4989	1.38722	1	0.999855	99.9978
GOTERM_BP_FAT	GO:0051254~positive regulation of RNA metabolic process	5	1.10375	0.484344	ENSBTAG00000032132, ENSBTAG00000002835, ENSBTAG00000004322, ENSBTAG00000008313, ENSBTAG00000003835	162	111	4989	1.38722	1	0.999855	99.9978
GOTERM_MF_FAT	GO:0003700~transcription factor activity	8	1.766	0.540976	ENSBTAG00000020713, ENSBTAG00000007917, ENSBTAG00000002835, ENSBTAG00000004322, ENSBTAG00000008313, ENSBTAG00000002333, ENSBTAG00000008943, ENSBTAG00000008545	161	222	5145	1.15159	1	0.999743	99.9977
GOTERM_BP_FAT	GO:0045935~positive regulation of nucleobase, nucleoside, nucleotide and nucleic acid metabolic process	6	1.3245	0.559634	ENSBTAG00000032132, ENSBTAG00000014541, ENSBTAG00000002835, ENSBTAG00000004322, ENSBTAG00000008313, ENSBTAG00000003835	162	154	4989	1.19986	1	0.999969	99.9998
GOTERM_BP_FAT	GO:0045944~positive regulation of transcription from RNA polymerase II promoter	4	0.883002	0.560349	ENSBTAG00000032132, ENSBTAG00000002835, ENSBTAG00000004322, ENSBTAG00000003835	162	90	4989	1.36872	1	0.999966	99.9998
GOTERM_MF_FAT	GO:0030528~transcription regulator activity	13	2.86976	0.610718	ENSBTAG00000011182, ENSBTAG00000003901, ENSBTAG00000002333, ENSBTAG00000012036, ENSBTAG00000008545, ENSBTAG00000020713, ENSBTAG00000032132, ENSBTAG00000007917, ENSBTAG00000002835, ENSBTAG00000017661, ENSBTAG00000004322, ENSBTAG00000008313, ENSBTAG00000008943	161	404	5145	1.0283	1	0.999872	99.9998
GOTERM_BP_FAT	GO:0045941~positive regulation of transcription	5	1.10375	0.657334	ENSBTAG00000032132, ENSBTAG00000002835, ENSBTAG00000004322, ENSBTAG00000008313, ENSBTAG00000003835	162	138	4989	1.11581	1	0.999997	100
GOTERM_MF_FAT	GO:0043565~sequence-specific DNA binding	5	1.10375	0.682616	ENSBTAG00000020713, ENSBTAG00000007917, ENSBTAG00000004322, ENSBTAG00000002333, ENSBTAG00000008545	161	148	5145	1.07961	1	0.999976	100
GOTERM_BP_FAT	GO:0006355~regulation of transcription, DNA-dependent	14	3.09051	0.751926	ENSBTAG00000003901, ENSBTAG00000002333, ENSBTAG00000008545, ENSBTAG00000005017, ENSBTAG00000020713, ENSBTAG00000032132, ENSBTAG00000007917, ENSBTAG00000002835, ENSBTAG00000017661, ENSBTAG00000004322, ENSBTAG00000008313, ENSBTAG00000016496, ENSBTAG00000008943, ENSBTAG00000003835	162	466	4989	0.925211	1	1	100
GOTERM_BP_FAT	GO:0051252~regulation of RNA metabolic process	14	3.09051	0.783429	ENSBTAG00000003901, ENSBTAG00000002333, ENSBTAG00000008545, ENSBTAG00000005017, ENSBTAG00000020713, ENSBTAG00000032132, ENSBTAG00000007917, ENSBTAG00000002835, ENSBTAG00000017661, ENSBTAG00000004322, ENSBTAG00000008313, ENSBTAG00000016496, ENSBTAG00000008943, ENSBTAG00000003835	162	478	4989	0.901984	1	1	100
GOTERM_BP_FAT	GO:0006357~regulation of transcription from RNA polymerase II promoter	5	1.10375	0.787037	ENSBTAG00000032132, ENSBTAG00000002835, ENSBTAG00000004322, ENSBTAG00000002333, ENSBTAG00000003835	162	165	4989	0.933221	1	1	100
GOTERM_BP_FAT	GO:0006350~transcription	8	1.766	0.97146	ENSBTAG00000032132, ENSBTAG00000002835, ENSBTAG00000017661, ENSBTAG00000006035, ENSBTAG00000019612, ENSBTAG00000002333, ENSBTAG00000008943, ENSBTAG00000008545	162	386	4989	0.638265	1	1	100
GOTERM_BP_FAT	GO:0045449~regulation of transcription	16	3.53201	0.977707	ENSBTAG00000011182, ENSBTAG00000003901, ENSBTAG00000002333, ENSBTAG00000008545, ENSBTAG00000012036, ENSBTAG00000005017, ENSBTAG00000020713, ENSBTAG00000032132, ENSBTAG00000007917, ENSBTAG00000002835, ENSBTAG00000017661, ENSBTAG00000004322, ENSBTAG00000008313, ENSBTAG00000016496, ENSBTAG00000008943, ENSBTAG00000003835	162	709	4989	0.69498	1	1	100
SP_PIR_KEYWORDS	transcription regulation	5	1.10375	0.989526	ENSBTAG00000002835, ENSBTAG00000017661, ENSBTAG00000002333, ENSBTAG00000008943, ENSBTAG00000008545	155	317	5056	0.514501	1	1	100
GOTERM_MF_FAT	GO:0003677~DNA binding	11	2.42826	0.996244	ENSBTAG00000020713, ENSBTAG00000012567, ENSBTAG00000007917, ENSBTAG00000002835, ENSBTAG00000017661, ENSBTAG00000004322, ENSBTAG00000008313, ENSBTAG00000003901, ENSBTAG00000002333, ENSBTAG00000008943, ENSBTAG00000008545	161	630	5145	0.557971	1	1	100
SP_PIR_KEYWORDS	Transcription	5	1.10375	0.997308	ENSBTAG00000002835, ENSBTAG00000017661, ENSBTAG00000002333, ENSBTAG00000008943, ENSBTAG00000008545	155	372	5056	0.438432	1	1	100
SP_PIR_KEYWORDS	nucleus	12	2.64901	0.999998	ENSBTAG00000019275, ENSBTAG00000002655, ENSBTAG00000039682, ENSBTAG00000003454, ENSBTAG00000012567, ENSBTAG00000002835, ENSBTAG00000009737, ENSBTAG00000017661, ENSBTAG00000004322, ENSBTAG00000002333, ENSBTAG00000008943, ENSBTAG00000008545	155	1015	5056	0.385648	1	1	100
Annotation Cluster 29; Enrichment Score: 0.2
Category	Term	Count	%	PValue	Genes	List Total	Pop Hits	Pop Total	Fold Enrichment	Bonferroni	Benjamini	FDR
GOTERM_BP_FAT	GO:0010605~negative regulation of macromolecule metabolic process	7	1.54525	0.527738	ENSBTAG00000001061, ENSBTAG00000019612, ENSBTAG00000003901, ENSBTAG00000002333, ENSBTAG00000003835, ENSBTAG00000012036, ENSBTAG00000002006	162	180	4989	1.19763	1	0.999931	99.9995
GOTERM_BP_FAT	GO:0031327~negative regulation of cellular biosynthetic process	5	1.10375	0.673985	ENSBTAG00000014541, ENSBTAG00000019612, ENSBTAG00000003901, ENSBTAG00000002333, ENSBTAG00000012036	162	141	4989	1.09207	1	0.999998	100
GOTERM_BP_FAT	GO:0009890~negative regulation of biosynthetic process	5	1.10375	0.695314	ENSBTAG00000014541, ENSBTAG00000019612, ENSBTAG00000003901, ENSBTAG00000002333, ENSBTAG00000012036	162	145	4989	1.06194	1	0.999999	100
GOTERM_BP_FAT	GO:0010558~negative regulation of macromolecule biosynthetic process	4	0.883002	0.833321	ENSBTAG00000019612, ENSBTAG00000003901, ENSBTAG00000002333, ENSBTAG00000012036	162	139	4989	0.886224	1	1	100
Annotation Cluster 30, Enrichment Score: 0.03
Category	Term	Count	%	PValue	Genes	List Total	Pop Hits	Pop Total	Fold Enrichment	Bonferroni	Benjamini	FDR
GOTERM_MF_FAT	GO:0030528~transcription regulator activity	13	2.86976	0.610718	ENSBTAG00000011182, ENSBTAG00000003901, ENSBTAG00000002333, ENSBTAG00000012036, ENSBTAG00000008545, ENSBTAG00000020713, ENSBTAG00000032132, ENSBTAG00000007917, ENSBTAG00000002835, ENSBTAG00000017661, ENSBTAG00000004322, ENSBTAG00000008313, ENSBTAG00000008943	161	404	5145	1.0283	1	0.999872	99.9998
GOTERM_CC_FAT	GO:0044451~nucleoplasm part	5	1.10375	0.954778	ENSBTAG00000032132, ENSBTAG00000002835, ENSBTAG00000004322, ENSBTAG00000011182, ENSBTAG00000012036	149	199	3834	0.646521	1	1	100
GOTERM_CC_FAT	GO:0005654~nucleoplasm	6	1.3245	0.95657	ENSBTAG00000013245, ENSBTAG00000032132, ENSBTAG00000002835, ENSBTAG00000004322, ENSBTAG00000011182, ENSBTAG00000012036	149	236	3834	0.654192	1	0.999999	100
GOTERM_BP_FAT	GO:0006350~transcription	8	1.766	0.97146	ENSBTAG00000032132, ENSBTAG00000002835, ENSBTAG00000017661, ENSBTAG00000006035, ENSBTAG00000019612, ENSBTAG00000002333, ENSBTAG00000008943, ENSBTAG00000008545	162	386	4989	0.638265	1	1	100
GOTERM_BP_FAT	GO:0045449~regulation of transcription	16	3.53201	0.977707	ENSBTAG00000011182, ENSBTAG00000003901, ENSBTAG00000002333, ENSBTAG00000008545, ENSBTAG00000012036, ENSBTAG00000005017, ENSBTAG00000020713, ENSBTAG00000032132, ENSBTAG00000007917, ENSBTAG00000002835, ENSBTAG00000017661, ENSBTAG00000004322, ENSBTAG00000008313, ENSBTAG00000016496, ENSBTAG00000008943, ENSBTAG00000003835	162	709	4989	0.69498	1	1	100
GOTERM_CC_FAT	GO:0031981~nuclear lumen	9	1.98675	0.984333	ENSBTAG00000013245, ENSBTAG00000032132, ENSBTAG00000002835, ENSBTAG00000004322, ENSBTAG00000017574, ENSBTAG00000011182, ENSBTAG00000019612, ENSBTAG00000008545, ENSBTAG00000012036	149	380	3834	0.609431	1	1	100
GOTERM_CC_FAT	GO:0070013~intracellular organelle lumen	10	2.20751	0.998971	ENSBTAG00000013245, ENSBTAG00000032132, ENSBTAG00000002835, ENSBTAG00000004322, ENSBTAG00000017574, ENSBTAG00000011182, ENSBTAG00000019612, ENSBTAG00000011927, ENSBTAG00000008545, ENSBTAG00000012036	149	517	3834	0.497709	1	1	100
GOTERM_CC_FAT	GO:0043233~organelle lumen	10	2.20751	0.998971	ENSBTAG00000013245, ENSBTAG00000032132, ENSBTAG00000002835, ENSBTAG00000004322, ENSBTAG00000017574, ENSBTAG00000011182, ENSBTAG00000019612, ENSBTAG00000011927, ENSBTAG00000008545, ENSBTAG00000012036	149	517	3834	0.497709	1	1	100
GOTERM_CC_FAT	GO:0031974~membrane-enclosed lumen	10	2.20751	0.999388	ENSBTAG00000013245, ENSBTAG00000032132, ENSBTAG00000002835, ENSBTAG00000004322, ENSBTAG00000017574, ENSBTAG00000011182, ENSBTAG00000019612, ENSBTAG00000011927, ENSBTAG00000008545, ENSBTAG00000012036	149	535	3834	0.480963	1	1	100
Annotation Cluster 31; Enrichment Score: 0.008
Category	Term	Count	%	PValue	Genes	List Total	Pop Hits	Pop Total	Fold Enrichment	Bonferroni	Benjamini	FDR
GOTERM_MF_FAT	GO:0005525~GTP binding	5	1.10375	0.892489	ENSBTAG00000030973, ENSBTAG00000031186, ENSBTAG00000001497, ENSBTAG00000014529, ENSBTAG00000022461	161	207	5145	0.771897	1	1	100
GOTERM_MF_FAT	GO:0032561~guanyl ribonucleotide binding	5	1.10375	0.896749	ENSBTAG00000030973, ENSBTAG00000031186, ENSBTAG00000001497, ENSBTAG00000014529, ENSBTAG00000022461	161	209	5145	0.76451	1	1	100
GOTERM_MF_FAT	GO:0019001~guanyl nucleotide binding	5	1.10375	0.898823	ENSBTAG00000030973, ENSBTAG00000031186, ENSBTAG00000001497, ENSBTAG00000014529, ENSBTAG00000022461	161	210	5145	0.76087	1	1	100
GOTERM_BP_FAT	GO:0006468~protein amino acid phosphorylation	5	1.10375	0.991818	ENSBTAG00000001061, ENSBTAG00000002699, ENSBTAG00000007173, ENSBTAG00000013294, ENSBTAG00000002006	162	309	4989	0.498322	1	1	100
GOTERM_MF_FAT	GO:0004672~protein kinase activity	4	0.883002	0.995134	ENSBTAG00000001061, ENSBTAG00000002699, ENSBTAG00000007173, ENSBTAG00000013294	161	289	5145	0.442305	1	1	100
GOTERM_BP_FAT	GO:0016310~phosphorylation	5	1.10375	0.998379	ENSBTAG00000001061, ENSBTAG00000002699, ENSBTAG00000007173, ENSBTAG00000013294, ENSBTAG00000002006	162	370	4989	0.416166	1	1	100
GOTERM_MF_FAT	GO:0017076~purine nucleotide binding	18	3.97351	0.998859	ENSBTAG00000013078, ENSBTAG00000030973, ENSBTAG00000000795, ENSBTAG00000031186, ENSBTAG00000003196, ENSBTAG00000001061, ENSBTAG00000039206, ENSBTAG00000006921, ENSBTAG00000016761, ENSBTAG00000014529, ENSBTAG00000000945, ENSBTAG00000003763, ENSBTAG00000001497, ENSBTAG00000002699, ENSBTAG00000007173, ENSBTAG00000013294, ENSBTAG00000003506, ENSBTAG00000022461	161	981	5145	0.586358	1	1	100
GOTERM_MF_FAT	GO:0030554~adenyl nucleotide binding	13	2.86976	0.999038	ENSBTAG00000013078, ENSBTAG00000000795, ENSBTAG00000003196, ENSBTAG00000039206, ENSBTAG00000001061, ENSBTAG00000006921, ENSBTAG00000016761, ENSBTAG00000000945, ENSBTAG00000003763, ENSBTAG00000002699, ENSBTAG00000007173, ENSBTAG00000013294, ENSBTAG00000003506	161	781	5145	0.531927	1	1	100
GOTERM_MF_FAT	GO:0001883~purine nucleoside binding	13	2.86976	0.999136	ENSBTAG00000013078, ENSBTAG00000000795, ENSBTAG00000003196, ENSBTAG00000039206, ENSBTAG00000001061, ENSBTAG00000006921, ENSBTAG00000016761, ENSBTAG00000000945, ENSBTAG00000003763, ENSBTAG00000002699, ENSBTAG00000007173, ENSBTAG00000013294, ENSBTAG00000003506	161	786	5145	0.528543	1	1	100
GOTERM_MF_FAT	GO:0001882~nucleoside binding	13	2.86976	0.999225	ENSBTAG00000013078, ENSBTAG00000000795, ENSBTAG00000003196, ENSBTAG00000039206, ENSBTAG00000001061, ENSBTAG00000006921, ENSBTAG00000016761, ENSBTAG00000000945, ENSBTAG00000003763, ENSBTAG00000002699, ENSBTAG00000007173, ENSBTAG00000013294, ENSBTAG00000003506	161	791	5145	0.525202	1	1	100
GOTERM_BP_FAT	GO:0006793~phosphorus metabolic process	6	1.3245	0.999364	ENSBTAG00000040559, ENSBTAG00000001061, ENSBTAG00000002699, ENSBTAG00000007173, ENSBTAG00000013294, ENSBTAG00000002006	162	455	4989	0.406105	1	1	100
GOTERM_BP_FAT	GO:0006796~phosphate metabolic process	6	1.3245	0.999364	ENSBTAG00000040559, ENSBTAG00000001061, ENSBTAG00000002699, ENSBTAG00000007173, ENSBTAG00000013294, ENSBTAG00000002006	162	455	4989	0.406105	1	1	100
GOTERM_MF_FAT	GO:0032553~ribonucleotide binding	16	3.53201	0.999487	ENSBTAG00000013078, ENSBTAG00000030973, ENSBTAG00000000795, ENSBTAG00000031186, ENSBTAG00000003196, ENSBTAG00000001061, ENSBTAG00000039206, ENSBTAG00000006921, ENSBTAG00000014529, ENSBTAG00000000945, ENSBTAG00000003763, ENSBTAG00000001497, ENSBTAG00000002699, ENSBTAG00000007173, ENSBTAG00000013294, ENSBTAG00000022461	161	938	5145	0.545101	1	1	100
GOTERM_MF_FAT	GO:0032555~purine ribonucleotide binding	16	3.53201	0.999487	ENSBTAG00000013078, ENSBTAG00000030973, ENSBTAG00000000795, ENSBTAG00000031186, ENSBTAG00000003196, ENSBTAG00000001061, ENSBTAG00000039206, ENSBTAG00000006921, ENSBTAG00000014529, ENSBTAG00000000945, ENSBTAG00000003763, ENSBTAG00000001497, ENSBTAG00000002699, ENSBTAG00000007173, ENSBTAG00000013294, ENSBTAG00000022461	161	938	5145	0.545101	1	1	100
GOTERM_MF_FAT	GO:0005524~ATP binding	11	2.42826	0.9996	ENSBTAG00000003763, ENSBTAG00000013078, ENSBTAG00000000795, ENSBTAG00000003196, ENSBTAG00000001061, ENSBTAG00000039206, ENSBTAG00000002699, ENSBTAG00000006921, ENSBTAG00000007173, ENSBTAG00000013294, ENSBTAG00000000945	161	732	5145	0.480221	1	1	100
SP_PIR_KEYWORDS	atp-binding	5	1.10375	0.999654	ENSBTAG00000013078, ENSBTAG00000000795, ENSBTAG00000001061, ENSBTAG00000002699, ENSBTAG00000013294	155	450	5056	0.362437	1	1	100
GOTERM_MF_FAT	GO:0032559~adenyl ribonucleotide binding	11	2.42826	0.999661	ENSBTAG00000003763, ENSBTAG00000013078, ENSBTAG00000000795, ENSBTAG00000003196, ENSBTAG00000001061, ENSBTAG00000039206, ENSBTAG00000002699, ENSBTAG00000006921, ENSBTAG00000007173, ENSBTAG00000013294, ENSBTAG00000000945	161	739	5145	0.475672	1	1	100
SP_PIR_KEYWORDS	nucleotide-binding	8	1.766	0.999674	ENSBTAG00000013078, ENSBTAG00000030973, ENSBTAG00000000795, ENSBTAG00000001497, ENSBTAG00000001061, ENSBTAG00000002699, ENSBTAG00000013294, ENSBTAG00000022461	155	611	5056	0.427095	1	1	100
GOTERM_MF_FAT	GO:0000166~nucleotide binding	20	4.41501	0.999843	ENSBTAG00000011037, ENSBTAG00000013078, ENSBTAG00000033727, ENSBTAG00000030973, ENSBTAG00000000795, ENSBTAG00000031186, ENSBTAG00000003196, ENSBTAG00000001061, ENSBTAG00000039206, ENSBTAG00000006921, ENSBTAG00000016761, ENSBTAG00000014529, ENSBTAG00000000945, ENSBTAG00000003763, ENSBTAG00000001497, ENSBTAG00000002699, ENSBTAG00000007173, ENSBTAG00000013294, ENSBTAG00000003506, ENSBTAG00000022461	161	1159	5145	0.55145	1	1	100
