# Supplementary material for: Characterisation of the Whole Blood mRNA Transcriptome in Holstein-Friesian and Jersey Calves in Response to Gradual Weaning
Source: PLoS One. 2016 Aug 1;11(8):e0159707. doi: 10.1371/journal.pone.0159707 (PMC4968839; doi:10.1371/journal.pone.0159707)
Supplement: S7 Table — Enriched functional annotation clusters (group enrichment score > 1.3) are highlighted in yellow. Functional annotations within the clusters which had a benjamini hochberg false discovery rate < 0.1 are highlighted in blue. (XLSX) [file pone.0159707.s007.xlsx]

## Sheet: Supplementary Table 5.7
S7 Table. Functional annotation clusters identified among the DEG between Holstein-Friesian and Jersey calves at day 8, relative to weaning
Annotation Cluster 1; Enrichment Score: 4.6
Category	Term	Count	%	PValue	Genes	List Total	Pop Hits	Pop Total	Fold Enrichment	Bonferroni	Benjamini	FDR
UP_SEQ_FEATURE	signal peptide	39	10.2362	2.13716e-11	ENSBTAG00000001388, ENSBTAG00000017846, ENSBTAG00000002006, ENSBTAG00000000585, ENSBTAG00000021565, ENSBTAG00000017328, ENSBTAG00000004950, ENSBTAG00000007421, ENSBTAG00000015094, ENSBTAG00000008792, ENSBTAG00000025250, ENSBTAG00000021176, ENSBTAG00000003826, ENSBTAG00000021807, ENSBTAG00000002069, ENSBTAG00000001580, ENSBTAG00000020116, ENSBTAG00000009812, ENSBTAG00000007740, ENSBTAG00000019386,…	112	436	4012	3.20421	7.45868e-09	7.45868e-09	2.9217e-08
SP_PIR_KEYWORDS	signal	39	10.2362	4.02909e-10	ENSBTAG00000001388, ENSBTAG00000017846, ENSBTAG00000002006, ENSBTAG00000000585, ENSBTAG00000021565, ENSBTAG00000017328, ENSBTAG00000004950, ENSBTAG00000007421, ENSBTAG00000015094, ENSBTAG00000008792, ENSBTAG00000025250, ENSBTAG00000021176, ENSBTAG00000003826, ENSBTAG00000021807, ENSBTAG00000002069, ENSBTAG00000001580, ENSBTAG00000020116, ENSBTAG00000009812, ENSBTAG00000007740, ENSBTAG00000019386,…	150	436	5056	3.01505	8.8237e-08	8.8237e-08	5.12502e-07
UP_SEQ_FEATURE	disulfide bond	30	7.87402	2.93884e-08	ENSBTAG00000001242, ENSBTAG00000000616, ENSBTAG00000017846, ENSBTAG00000002006, ENSBTAG00000000585, ENSBTAG00000017328, ENSBTAG00000021565, ENSBTAG00000004950, ENSBTAG00000020990, ENSBTAG00000002885, ENSBTAG00000008792, ENSBTAG00000025250, ENSBTAG00000021176, ENSBTAG00000003826, ENSBTAG00000001580, ENSBTAG00000011961, ENSBTAG00000009812, ENSBTAG00000010155, ENSBTAG00000014546, ENSBTAG00000007191,…	112	348	4012	3.08805	1.02565e-05	5.12827e-06	4.01768e-05
GOTERM_BP_FAT	GO:0006935~chemotaxis	11	2.88714	1.43329e-07	ENSBTAG00000007191, ENSBTAG00000014541, ENSBTAG00000001321, ENSBTAG00000038042, ENSBTAG00000001061, ENSBTAG00000020872, ENSBTAG00000011961, ENSBTAG00000009812, ENSBTAG00000037735, ENSBTAG00000025250, ENSBTAG00000010155	152	39	4989	9.25759	0.000168111	8.4059e-05	0.000231059
GOTERM_BP_FAT	GO:0042330~taxis	11	2.88714	1.43329e-07	ENSBTAG00000007191, ENSBTAG00000014541, ENSBTAG00000001321, ENSBTAG00000038042, ENSBTAG00000001061, ENSBTAG00000020872, ENSBTAG00000011961, ENSBTAG00000009812, ENSBTAG00000037735, ENSBTAG00000025250, ENSBTAG00000010155	152	39	4989	9.25759	0.000168111	8.4059e-05	0.000231059
GOTERM_MF_FAT	GO:0030247~polysaccharide binding	10	2.62467	1.89405e-07	ENSBTAG00000012855, ENSBTAG00000011961, ENSBTAG00000009812, ENSBTAG00000019612, ENSBTAG00000014546, ENSBTAG00000010155, ENSBTAG00000021176, ENSBTAG00000009012, ENSBTAG00000003835, ENSBTAG00000002006	151	32	5145	10.6478	6.55321e-05	6.55321e-05	0.000258603
GOTERM_MF_FAT	GO:0001871~pattern binding	10	2.62467	1.89405e-07	ENSBTAG00000012855, ENSBTAG00000011961, ENSBTAG00000009812, ENSBTAG00000019612, ENSBTAG00000014546, ENSBTAG00000010155, ENSBTAG00000021176, ENSBTAG00000009012, ENSBTAG00000003835, ENSBTAG00000002006	151	32	5145	10.6478	6.55321e-05	6.55321e-05	0.000258603
GOTERM_CC_FAT	GO:0005576~extracellular region	29	7.61155	2.11049e-07	ENSBTAG00000038652, ENSBTAG00000001388, ENSBTAG00000002006, ENSBTAG00000008817, ENSBTAG00000006662, ENSBTAG00000017328, ENSBTAG00000021565, ENSBTAG00000004950, ENSBTAG00000001321, ENSBTAG00000002885, ENSBTAG00000000793, ENSBTAG00000025250, ENSBTAG00000003806, ENSBTAG00000021176, ENSBTAG00000021807, ENSBTAG00000011961, ENSBTAG00000009812, ENSBTAG00000020178, ENSBTAG00000010155, ENSBTAG00000007191,…	130	292	3834	2.92903	3.35562e-05	3.35562e-05	0.000254566
SP_PIR_KEYWORDS	disulfide bond	31	8.13648	2.29128e-07	ENSBTAG00000001242, ENSBTAG00000017846, ENSBTAG00000000616, ENSBTAG00000002006, ENSBTAG00000000585, ENSBTAG00000017328, ENSBTAG00000021565, ENSBTAG00000004950, ENSBTAG00000020990, ENSBTAG00000002885, ENSBTAG00000008792, ENSBTAG00000025250, ENSBTAG00000021176, ENSBTAG00000003826, ENSBTAG00000001580, ENSBTAG00000011961, ENSBTAG00000009812, ENSBTAG00000010155, ENSBTAG00000014546, ENSBTAG00000006161,…	150	371	5056	2.81646	5.01779e-05	2.50892e-05	0.000291452
SP_PIR_KEYWORDS	glycoprotein	38	9.97375	4.05977e-07	ENSBTAG00000001242, ENSBTAG00000017846, ENSBTAG00000000616, ENSBTAG00000002006, ENSBTAG00000000585, ENSBTAG00000003454, ENSBTAG00000002348, ENSBTAG00000004950, ENSBTAG00000020990, ENSBTAG00000007421, ENSBTAG00000002885, ENSBTAG00000015094, ENSBTAG00000008792, ENSBTAG00000021176, ENSBTAG00000003826, ENSBTAG00000010238, ENSBTAG00000011961, ENSBTAG00000001154, ENSBTAG00000018164, ENSBTAG00000020178,…	150	536	5056	2.38965	8.89049e-05	2.96359e-05	0.000516403
GOTERM_MF_FAT	GO:0008201~heparin binding	8	2.09974	5.84818e-07	ENSBTAG00000012855, ENSBTAG00000011961, ENSBTAG00000009812, ENSBTAG00000019612, ENSBTAG00000010155, ENSBTAG00000021176, ENSBTAG00000003835, ENSBTAG00000002006	151	19	5145	14.3465	0.000202327	0.000101168	0.000798474
GOTERM_BP_FAT	GO:0006955~immune response	21	5.51181	6.21964e-07	ENSBTAG00000002069, ENSBTAG00000031725, ENSBTAG00000020116, ENSBTAG00000011961, ENSBTAG00000009812, ENSBTAG00000033748, ENSBTAG00000019386, ENSBTAG00000014529, ENSBTAG00000014546, ENSBTAG00000010155, ENSBTAG00000012208, ENSBTAG00000020285, ENSBTAG00000002006, ENSBTAG00000007191, ENSBTAG00000015565, ENSBTAG00000009836, ENSBTAG00000001321, ENSBTAG00000003289, ENSBTAG00000015094, ENSBTAG00000025250,…	152	187	4989	3.68593	0.000729298	0.000182374	0.00100266
GOTERM_BP_FAT	GO:0007626~locomotory behavior	12	3.14961	2.53385e-06	ENSBTAG00000007191, ENSBTAG00000014541, ENSBTAG00000001321, ENSBTAG00000038042, ENSBTAG00000001061, ENSBTAG00000005078, ENSBTAG00000020872, ENSBTAG00000011961, ENSBTAG00000009812, ENSBTAG00000037735, ENSBTAG00000025250, ENSBTAG00000010155	152	64	4989	6.15419	0.00296779	0.000594264	0.00408471
SP_PIR_KEYWORDS	Secreted	20	5.24934	3.36976e-06	ENSBTAG00000021807, ENSBTAG00000001388, ENSBTAG00000011961, ENSBTAG00000009812, ENSBTAG00000020178, ENSBTAG00000010155, ENSBTAG00000007191, ENSBTAG00000021565, ENSBTAG00000017328, ENSBTAG00000004950, ENSBTAG00000009836, ENSBTAG00000014541, ENSBTAG00000001321, ENSBTAG00000004982, ENSBTAG00000027126, ENSBTAG00000019612, ENSBTAG00000025250, ENSBTAG00000021176, ENSBTAG00000009012, ENSBTAG00000003835	150	195	5056	3.45709	0.000737707	0.000184478	0.00428627
GOTERM_MF_FAT	GO:0030246~carbohydrate binding	12	3.14961	5.86336e-06	ENSBTAG00000012855, ENSBTAG00000030424, ENSBTAG00000011961, ENSBTAG00000009812, ENSBTAG00000019612, ENSBTAG00000007312, ENSBTAG00000014546, ENSBTAG00000010155, ENSBTAG00000021176, ENSBTAG00000009012, ENSBTAG00000003835, ENSBTAG00000002006	151	72	5145	5.67881	0.00202667	0.000676015	0.0080052
GOTERM_CC_FAT	GO:0005615~extracellular space	15	3.93701	6.32324e-06	ENSBTAG00000011961, ENSBTAG00000009812, ENSBTAG00000010155, ENSBTAG00000002006, ENSBTAG00000007191, ENSBTAG00000021565, ENSBTAG00000014541, ENSBTAG00000012855, ENSBTAG00000001321, ENSBTAG00000004982, ENSBTAG00000002885, ENSBTAG00000019612, ENSBTAG00000025250, ENSBTAG00000003806, ENSBTAG00000003835	130	103	3834	4.295	0.00100489	0.000502573	0.00762679
GOTERM_CC_FAT	GO:0044421~extracellular region part	19	4.98688	6.45857e-06	ENSBTAG00000011961, ENSBTAG00000009812, ENSBTAG00000010155, ENSBTAG00000008817, ENSBTAG00000002006, ENSBTAG00000007191, ENSBTAG00000006662, ENSBTAG00000021565, ENSBTAG00000012855, ENSBTAG00000014541, ENSBTAG00000001321, ENSBTAG00000004982, ENSBTAG00000002885, ENSBTAG00000000793, ENSBTAG00000019612, ENSBTAG00000025250, ENSBTAG00000003806, ENSBTAG00000021176, ENSBTAG00000003835	130	164	3834	3.41679	0.00102639	0.000342247	0.00779002
GOTERM_BP_FAT	GO:0007610~behavior	14	3.67454	7.81831e-06	ENSBTAG00000001061, ENSBTAG00000020872, ENSBTAG00000037735, ENSBTAG00000009812, ENSBTAG00000011961, ENSBTAG00000006035, ENSBTAG00000010155, ENSBTAG00000006161, ENSBTAG00000007191, ENSBTAG00000014541, ENSBTAG00000038042, ENSBTAG00000001321, ENSBTAG00000005078, ENSBTAG00000025250	152	100	4989	4.59513	0.00912898	0.00152732	0.0126031
GOTERM_MF_FAT	GO:0005539~glycosaminoglycan binding	8	2.09974	8.46808e-06	ENSBTAG00000012855, ENSBTAG00000011961, ENSBTAG00000009812, ENSBTAG00000019612, ENSBTAG00000010155, ENSBTAG00000021176, ENSBTAG00000003835, ENSBTAG00000002006	151	27	5145	10.0957	0.00292568	0.000732224	0.0115612
GOTERM_MF_FAT	GO:0042379~chemokine receptor binding	6	1.5748	1.32327e-05	ENSBTAG00000007191, ENSBTAG00000003289, ENSBTAG00000011961, ENSBTAG00000009812, ENSBTAG00000025250, ENSBTAG00000010155	151	12	5145	17.0364	0.00456807	0.000915288	0.0180656
GOTERM_MF_FAT	GO:0008009~chemokine activity	6	1.5748	1.32327e-05	ENSBTAG00000007191, ENSBTAG00000003289, ENSBTAG00000011961, ENSBTAG00000009812, ENSBTAG00000025250, ENSBTAG00000010155	151	12	5145	17.0364	0.00456807	0.000915288	0.0180656
GOTERM_MF_FAT	GO:0005125~cytokine activity	8	2.09974	5.27066e-05	ENSBTAG00000007191, ENSBTAG00000001321, ENSBTAG00000003289, ENSBTAG00000011961, ENSBTAG00000009812, ENSBTAG00000025250, ENSBTAG00000010155, ENSBTAG00000003835	151	35	5145	7.78808	0.0180717	0.00303488	0.0719386
INTERPRO	IPR001811:Small chemokine, interleukin-8-like	5	1.31234	0.00011643	ENSBTAG00000007191, ENSBTAG00000011961, ENSBTAG00000009812, ENSBTAG00000025250, ENSBTAG00000010155	181	10	6326	17.4751	0.0423899	0.0107702	0.160562
SP_PIR_KEYWORDS	heparin-binding	5	1.31234	0.000132502	ENSBTAG00000012855, ENSBTAG00000011961, ENSBTAG00000009812, ENSBTAG00000010155, ENSBTAG00000002006	150	10	5056	16.8533	0.0286028	0.00578715	0.168412
KEGG_PATHWAY	bta04060:Cytokine-cytokine receptor interaction	13	3.41207	0.000146872	ENSBTAG00000031725, ENSBTAG00000011961, ENSBTAG00000033748, ENSBTAG00000006161, ENSBTAG00000007191, ENSBTAG00000038042, ENSBTAG00000001321, ENSBTAG00000003289, ENSBTAG00000003781, ENSBTAG00000007173, ENSBTAG00000018572, ENSBTAG00000025250, ENSBTAG00000006343	96	109	2949	3.6637	0.013857	0.013857	0.161324
SMART	SM00199:SCY	5	1.31234	0.000159814	ENSBTAG00000007191, ENSBTAG00000011961, ENSBTAG00000009812, ENSBTAG00000025250, ENSBTAG00000010155	92	10	2924	15.8913	0.0134934	0.0067696	0.171805
SP_PIR_KEYWORDS	cytokine	7	1.83727	0.000160536	ENSBTAG00000007191, ENSBTAG00000001321, ENSBTAG00000011961, ENSBTAG00000009812, ENSBTAG00000025250, ENSBTAG00000010155, ENSBTAG00000003835	150	29	5056	8.13609	0.0345493	0.0058429	0.204011
GOTERM_BP_FAT	GO:0006954~inflammatory response	9	2.3622	0.000551849	ENSBTAG00000007191, ENSBTAG00000011374, ENSBTAG00000001321, ENSBTAG00000002835, ENSBTAG00000015094, ENSBTAG00000025250, ENSBTAG00000014546, ENSBTAG00000010155, ENSBTAG00000002006	152	63	4989	4.68891	0.476646	0.0777484	0.885928
GOTERM_BP_FAT	GO:0006952~defense response	12	3.14961	0.000857791	ENSBTAG00000007191, ENSBTAG00000011374, ENSBTAG00000009836, ENSBTAG00000001321, ENSBTAG00000002835, ENSBTAG00000015094, ENSBTAG00000033748, ENSBTAG00000025250, ENSBTAG00000014546, ENSBTAG00000010155, ENSBTAG00000015727, ENSBTAG00000002006	152	119	4989	3.30982	0.634548	0.0957614	1.3739
GOTERM_BP_FAT	GO:0009611~response to wounding	11	2.88714	0.00126122	ENSBTAG00000007191, ENSBTAG00000011374, ENSBTAG00000001321, ENSBTAG00000002835, ENSBTAG00000015094, ENSBTAG00000011961, ENSBTAG00000007740, ENSBTAG00000025250, ENSBTAG00000014546, ENSBTAG00000010155, ENSBTAG00000002006	152	106	4989	3.40609	0.772441	0.125914	2.01393
SP_PIR_KEYWORDS	chemotaxis	5	1.31234	0.00160572	ENSBTAG00000007191, ENSBTAG00000011961, ENSBTAG00000009812, ENSBTAG00000025250, ENSBTAG00000010155	150	18	5056	9.36296	0.296675	0.0267088	2.02338
SP_PIR_KEYWORDS	inflammatory response	5	1.31234	0.00486026	ENSBTAG00000007191, ENSBTAG00000001321, ENSBTAG00000025250, ENSBTAG00000014546, ENSBTAG00000010155	150	24	5056	7.02222	0.655958	0.0608351	6.00922
GOTERM_CC_FAT	GO:0031012~extracellular matrix	7	1.83727	0.0309865	ENSBTAG00000006662, ENSBTAG00000004982, ENSBTAG00000000793, ENSBTAG00000019612, ENSBTAG00000021176, ENSBTAG00000008817, ENSBTAG00000003835	130	71	3834	2.90769	0.993294	0.426552	31.5913
GOTERM_BP_FAT	GO:0001817~regulation of cytokine production	6	1.5748	0.086334	ENSBTAG00000011374, ENSBTAG00000001321, ENSBTAG00000025161, ENSBTAG00000001333, ENSBTAG00000014546, ENSBTAG00000002006	152	78	4989	2.5248	1	0.899981	76.673
GOTERM_CC_FAT	GO:0005578~proteinaceous extracellular matrix	5	1.31234	0.141712	ENSBTAG00000006662, ENSBTAG00000004982, ENSBTAG00000019612, ENSBTAG00000008817, ENSBTAG00000003835	130	60	3834	2.45769	1	0.890176	84.1698
KEGG_PATHWAY	bta04062:Chemokine signaling pathway	7	1.83727	0.173112	ENSBTAG00000007191, ENSBTAG00000038042, ENSBTAG00000003289, ENSBTAG00000011961, ENSBTAG00000009812, ENSBTAG00000000820, ENSBTAG00000025250	96	117	2949	1.83787	1	0.724692	87.6242
GOTERM_BP_FAT	GO:0051050~positive regulation of transport	4	1.04987	0.199703	ENSBTAG00000019612, ENSBTAG00000014546, ENSBTAG00000009012, ENSBTAG00000003835	152	51	4989	2.5743	1	0.97608	97.2437
GOTERM_BP_FAT	GO:0010033~response to organic substance	6	1.5748	0.400502	ENSBTAG00000007191, ENSBTAG00000001321, ENSBTAG00000001333, ENSBTAG00000003506, ENSBTAG00000014546, ENSBTAG00000002006	152	137	4989	1.43748	1	0.998633	99.9738
Annotation Cluster 2; Enrichment Score: 4.4
Category	Term	Count	%	PValue	Genes	List Total	Pop Hits	Pop Total	Fold Enrichment	Bonferroni	Benjamini	FDR
INTERPRO	IPR001304:C-type lectin	8	2.09974	1.59708e-06	ENSBTAG00000038843, ENSBTAG00000007720, ENSBTAG00000030424, ENSBTAG00000012815, ENSBTAG00000007312, ENSBTAG00000014546, ENSBTAG00000012029, ENSBTAG00000020285	181	22	6326	12.7092	0.000593936	0.000593936	0.00220405
SMART	SM00034:CLECT	8	2.09974	2.61577e-06	ENSBTAG00000038843, ENSBTAG00000007720, ENSBTAG00000030424, ENSBTAG00000012815, ENSBTAG00000007312, ENSBTAG00000014546, ENSBTAG00000012029, ENSBTAG00000020285	92	22	2924	11.5573	0.000222316	0.000222316	0.0028142
INTERPRO	IPR016186:C-type lectin-like	8	2.09974	3.08832e-06	ENSBTAG00000038843, ENSBTAG00000007720, ENSBTAG00000030424, ENSBTAG00000012815, ENSBTAG00000007312, ENSBTAG00000014546, ENSBTAG00000012029, ENSBTAG00000020285	181	24	6326	11.6501	0.0011482	0.000574263	0.00426201
INTERPRO	IPR018378:C-type lectin, conserved site	5	1.31234	0.000262419	ENSBTAG00000030424, ENSBTAG00000013366, ENSBTAG00000007312, ENSBTAG00000014546, ENSBTAG00000020285	181	12	6326	14.5626	0.093018	0.0193371	0.361549
SP_PIR_KEYWORDS	Lectin	4	1.04987	0.0397273	ENSBTAG00000030424, ENSBTAG00000007312, ENSBTAG00000014546, ENSBTAG00000020285	150	26	5056	5.18564	0.999861	0.358464	40.2885
Annotation Cluster 3; Enrichment Score: 3.8
Category	Term	Count	%	PValue	Genes	List Total	Pop Hits	Pop Total	Fold Enrichment	Bonferroni	Benjamini	FDR
GOTERM_BP_FAT	GO:0007186~G-protein coupled receptor protein signaling pathway	20	5.24934	2.98349e-08	ENSBTAG00000021807, ENSBTAG00000038141, ENSBTAG00000001242, ENSBTAG00000001388, ENSBTAG00000010238, ENSBTAG00000020872, ENSBTAG00000037735, ENSBTAG00000000616, ENSBTAG00000014497, ENSBTAG00000011374, ENSBTAG00000004076, ENSBTAG00000020990, ENSBTAG00000003544, ENSBTAG00000038042, ENSBTAG00000008483, ENSBTAG00000013791, ENSBTAG00000038981, ENSBTAG00000003528, ENSBTAG00000000820, ENSBTAG00000007996	152	141	4989	4.65566	3.49957e-05	3.49957e-05	4.80965e-05
GOTERM_BP_FAT	GO:0007166~cell surface receptor linked signal transduction	29	7.61155	4.56975e-07	ENSBTAG00000001242, ENSBTAG00000001388, ENSBTAG00000020872, ENSBTAG00000000616, ENSBTAG00000011374, ENSBTAG00000020990, ENSBTAG00000038981, ENSBTAG00000000820, ENSBTAG00000007996, ENSBTAG00000021807, ENSBTAG00000038141, ENSBTAG00000010238, ENSBTAG00000037735, ENSBTAG00000014546, ENSBTAG00000006161, ENSBTAG00000014497, ENSBTAG00000004076, ENSBTAG00000003544, ENSBTAG00000014541, ENSBTAG00000008483,…	152	332	4989	2.86701	0.000535888	0.000178661	0.000736682
SP_PIR_KEYWORDS	receptor	20	5.24934	0.000213508	ENSBTAG00000001242, ENSBTAG00000001333, ENSBTAG00000010238, ENSBTAG00000020872, ENSBTAG00000037735, ENSBTAG00000033748, ENSBTAG00000012029, ENSBTAG00000000616, ENSBTAG00000006161, ENSBTAG00000011374, ENSBTAG00000020990, ENSBTAG00000038042, ENSBTAG00000008483, ENSBTAG00000013791, ENSBTAG00000013755, ENSBTAG00000002885, ENSBTAG00000007173, ENSBTAG00000004043, ENSBTAG00000015311, ENSBTAG00000006343	150	262	5056	2.57303	0.0456867	0.0066582	0.271244
KEGG_PATHWAY	bta04080:Neuroactive ligand-receptor interaction	10	2.62467	0.000232745	ENSBTAG00000011374, ENSBTAG00000021565, ENSBTAG00000020990, ENSBTAG00000003544, ENSBTAG00000008483, ENSBTAG00000001242, ENSBTAG00000010238, ENSBTAG00000020872, ENSBTAG00000021958, ENSBTAG00000007996	96	67	2949	4.58489	0.0218706	0.0109958	0.255537
INTERPRO	IPR017452:GPCR, rhodopsin-like superfamily	9	2.3622	0.000769109	ENSBTAG00000011374, ENSBTAG00000020990, ENSBTAG00000038042, ENSBTAG00000013791, ENSBTAG00000001242, ENSBTAG00000010238, ENSBTAG00000020872, ENSBTAG00000037735, ENSBTAG00000000616	181	70	6326	4.49361	0.248901	0.0400637	1.05621
INTERPRO	IPR000276:7TM GPCR, rhodopsin-like	9	2.3622	0.000769109	ENSBTAG00000011374, ENSBTAG00000020990, ENSBTAG00000038042, ENSBTAG00000013791, ENSBTAG00000001242, ENSBTAG00000010238, ENSBTAG00000020872, ENSBTAG00000037735, ENSBTAG00000000616	181	70	6326	4.49361	0.248901	0.0400637	1.05621
SP_PIR_KEYWORDS	g-protein coupled receptor	9	2.3622	0.00136807	ENSBTAG00000011374, ENSBTAG00000020990, ENSBTAG00000038042, ENSBTAG00000008483, ENSBTAG00000013791, ENSBTAG00000001242, ENSBTAG00000010238, ENSBTAG00000020872, ENSBTAG00000000616	150	74	5056	4.09946	0.259043	0.0246749	1.72631
SP_PIR_KEYWORDS	transducer	10	2.62467	0.00178233	ENSBTAG00000011374, ENSBTAG00000020990, ENSBTAG00000038042, ENSBTAG00000008483, ENSBTAG00000013791, ENSBTAG00000001242, ENSBTAG00000010238, ENSBTAG00000020872, ENSBTAG00000000820, ENSBTAG00000000616	150	95	5056	3.54807	0.323403	0.0275199	2.24361
PIR_SUPERFAMILY	PIRSF800006:rhodopsin-like G protein-coupled receptors	5	1.31234	0.0898676	ENSBTAG00000011374, ENSBTAG00000020990, ENSBTAG00000001242, ENSBTAG00000010238, ENSBTAG00000000616	96	48	2661	2.88737	0.999949	0.999949	65.1727
Annotation Cluster 4; Enrichment Score: 3.7
Category	Term	Count	%	PValue	Genes	List Total	Pop Hits	Pop Total	Fold Enrichment	Bonferroni	Benjamini	FDR
UP_SEQ_FEATURE	disulfide bond	30	7.87402	2.93884e-08	ENSBTAG00000001242, ENSBTAG00000000616, ENSBTAG00000017846, ENSBTAG00000002006, ENSBTAG00000000585, ENSBTAG00000017328, ENSBTAG00000021565, ENSBTAG00000004950, ENSBTAG00000020990, ENSBTAG00000002885, ENSBTAG00000008792, ENSBTAG00000025250, ENSBTAG00000021176, ENSBTAG00000003826, ENSBTAG00000001580, ENSBTAG00000011961, ENSBTAG00000009812, ENSBTAG00000010155, ENSBTAG00000014546, ENSBTAG00000007191,…	112	348	4012	3.08805	1.02565e-05	5.12827e-06	4.01768e-05
SP_PIR_KEYWORDS	disulfide bond	31	8.13648	2.29128e-07	ENSBTAG00000001242, ENSBTAG00000017846, ENSBTAG00000000616, ENSBTAG00000002006, ENSBTAG00000000585, ENSBTAG00000017328, ENSBTAG00000021565, ENSBTAG00000004950, ENSBTAG00000020990, ENSBTAG00000002885, ENSBTAG00000008792, ENSBTAG00000025250, ENSBTAG00000021176, ENSBTAG00000003826, ENSBTAG00000001580, ENSBTAG00000011961, ENSBTAG00000009812, ENSBTAG00000010155, ENSBTAG00000014546, ENSBTAG00000006161,…	150	371	5056	2.81646	5.01779e-05	2.50892e-05	0.000291452
SP_PIR_KEYWORDS	glycoprotein	38	9.97375	4.05977e-07	ENSBTAG00000001242, ENSBTAG00000017846, ENSBTAG00000000616, ENSBTAG00000002006, ENSBTAG00000000585, ENSBTAG00000003454, ENSBTAG00000002348, ENSBTAG00000004950, ENSBTAG00000020990, ENSBTAG00000007421, ENSBTAG00000002885, ENSBTAG00000015094, ENSBTAG00000008792, ENSBTAG00000021176, ENSBTAG00000003826, ENSBTAG00000010238, ENSBTAG00000011961, ENSBTAG00000001154, ENSBTAG00000018164, ENSBTAG00000020178,…	150	536	5056	2.38965	8.89049e-05	2.96359e-05	0.000516403
UP_SEQ_FEATURE	glycosylation site:N-linked (GlcNAc...)	33	8.66142	1.82257e-06	ENSBTAG00000001242, ENSBTAG00000017846, ENSBTAG00000000616, ENSBTAG00000002006, ENSBTAG00000000585, ENSBTAG00000002348, ENSBTAG00000004950, ENSBTAG00000020990, ENSBTAG00000007421, ENSBTAG00000002885, ENSBTAG00000015094, ENSBTAG00000008792, ENSBTAG00000021176, ENSBTAG00000003826, ENSBTAG00000010238, ENSBTAG00000001154, ENSBTAG00000018164, ENSBTAG00000020178, ENSBTAG00000014546, ENSBTAG00000006161,…	112	494	4012	2.39293	0.000635874	0.000212003	0.0024916
GOTERM_CC_FAT	GO:0031224~intrinsic to membrane	67	17.5853	9.77871e-05	ENSBTAG00000001242, ENSBTAG00000020872, ENSBTAG00000019521, ENSBTAG00000017846, ENSBTAG00000000616, ENSBTAG00000008294, ENSBTAG00000000585, ENSBTAG00000011374, ENSBTAG00000002348, ENSBTAG00000011882, ENSBTAG00000038981, ENSBTAG00000031265, ENSBTAG00000003826, ENSBTAG00000009737, ENSBTAG00000010238, ENSBTAG00000001154, ENSBTAG00000037735, ENSBTAG00000019386, ENSBTAG00000010532, ENSBTAG00000006161,…	130	1344	3834	1.47023	0.0154286	0.00387968	0.117886
UP_SEQ_FEATURE	topological domain:Extracellular	19	4.98688	0.000583119	ENSBTAG00000001242, ENSBTAG00000010238, ENSBTAG00000018164, ENSBTAG00000014546, ENSBTAG00000008294, ENSBTAG00000000616, ENSBTAG00000017846, ENSBTAG00000006161, ENSBTAG00000012228, ENSBTAG00000002348, ENSBTAG00000020990, ENSBTAG00000008483, ENSBTAG00000007421, ENSBTAG00000030424, ENSBTAG00000013755, ENSBTAG00000002885, ENSBTAG00000027126, ENSBTAG00000018432, ENSBTAG00000003826	112	281	4012	2.42209	0.184185	0.0496187	0.794243
SP_PIR_KEYWORDS	transmembrane	47	12.336	0.00111808	ENSBTAG00000010068, ENSBTAG00000001242, ENSBTAG00000020872, ENSBTAG00000018808, ENSBTAG00000019521, ENSBTAG00000017846, ENSBTAG00000000616, ENSBTAG00000008294, ENSBTAG00000002555, ENSBTAG00000011374, ENSBTAG00000015565, ENSBTAG00000002348, ENSBTAG00000020990, ENSBTAG00000007421, ENSBTAG00000031265, ENSBTAG00000002885, ENSBTAG00000003826, ENSBTAG00000002069, ENSBTAG00000001580, ENSBTAG00000038141,…	150	1020	5056	1.55315	0.217293	0.0220262	1.41293
GOTERM_CC_FAT	GO:0016021~integral to membrane	61	16.0105	0.00133613	ENSBTAG00000001242, ENSBTAG00000020872, ENSBTAG00000019521, ENSBTAG00000017846, ENSBTAG00000000616, ENSBTAG00000008294, ENSBTAG00000011374, ENSBTAG00000002348, ENSBTAG00000011882, ENSBTAG00000038981, ENSBTAG00000031265, ENSBTAG00000003826, ENSBTAG00000009737, ENSBTAG00000010238, ENSBTAG00000001154, ENSBTAG00000037735, ENSBTAG00000019386, ENSBTAG00000010532, ENSBTAG00000006161, ENSBTAG00000014497,…	130	1288	3834	1.39676	0.19151	0.0416261	1.59977
SP_PIR_KEYWORDS	cell membrane	17	4.46194	0.00304123	ENSBTAG00000038141, ENSBTAG00000001242, ENSBTAG00000001061, ENSBTAG00000010238, ENSBTAG00000000616, ENSBTAG00000017846, ENSBTAG00000000585, ENSBTAG00000009873, ENSBTAG00000002348, ENSBTAG00000039682, ENSBTAG00000020990, ENSBTAG00000012855, ENSBTAG00000008483, ENSBTAG00000007421, ENSBTAG00000015094, ENSBTAG00000027126, ENSBTAG00000000820	150	254	5056	2.25596	0.486777	0.0408332	3.80026
GOTERM_CC_FAT	GO:0005886~plasma membrane	34	8.92388	0.0059452	ENSBTAG00000013525, ENSBTAG00000001242, ENSBTAG00000001061, ENSBTAG00000017846, ENSBTAG00000000616, ENSBTAG00000002006, ENSBTAG00000000585, ENSBTAG00000015565, ENSBTAG00000039682, ENSBTAG00000002348, ENSBTAG00000020990, ENSBTAG00000007421, ENSBTAG00000017574, ENSBTAG00000015094, ENSBTAG00000000820, ENSBTAG00000002069, ENSBTAG00000038141, ENSBTAG00000020116, ENSBTAG00000010238, ENSBTAG00000018181,…	130	640	3834	1.56678	0.612527	0.146166	6.9399
UP_SEQ_FEATURE	topological domain:Cytoplasmic	21	5.51181	0.0191334	ENSBTAG00000001580, ENSBTAG00000009737, ENSBTAG00000001242, ENSBTAG00000010238, ENSBTAG00000018164, ENSBTAG00000014546, ENSBTAG00000008294, ENSBTAG00000000616, ENSBTAG00000017846, ENSBTAG00000006161, ENSBTAG00000012228, ENSBTAG00000002348, ENSBTAG00000020990, ENSBTAG00000008483, ENSBTAG00000007421, ENSBTAG00000030424, ENSBTAG00000013755, ENSBTAG00000002885, ENSBTAG00000027126, ENSBTAG00000018432,…	112	447	4012	1.68289	0.99882	0.67493	23.2109
UP_SEQ_FEATURE	transmembrane region	31	8.13648	0.0560841	ENSBTAG00000010068, ENSBTAG00000001242, ENSBTAG00000018808, ENSBTAG00000019521, ENSBTAG00000000616, ENSBTAG00000008294, ENSBTAG00000017846, ENSBTAG00000002555, ENSBTAG00000002348, ENSBTAG00000020990, ENSBTAG00000007421, ENSBTAG00000002885, ENSBTAG00000003826, ENSBTAG00000001580, ENSBTAG00000009737, ENSBTAG00000021036, ENSBTAG00000010238, ENSBTAG00000001154, ENSBTAG00000018164, ENSBTAG00000014546,…	112	821	4012	1.35258	1	0.893348	54.573
SP_PIR_KEYWORDS	membrane	48	12.5984	0.0653498	ENSBTAG00000010068, ENSBTAG00000001242, ENSBTAG00000001061, ENSBTAG00000018808, ENSBTAG00000019521, ENSBTAG00000017846, ENSBTAG00000000616, ENSBTAG00000008294, ENSBTAG00000002555, ENSBTAG00000000585, ENSBTAG00000003454, ENSBTAG00000002348, ENSBTAG00000039682, ENSBTAG00000020990, ENSBTAG00000007421, ENSBTAG00000002885, ENSBTAG00000015094, ENSBTAG00000000820, ENSBTAG00000003826, ENSBTAG00000002069,…	150	1305	5056	1.23979	1	0.505789	57.6693
Annotation Cluster 5; Enrichment Score: 2.4
Category	Term	Count	%	PValue	Genes	List Total	Pop Hits	Pop Total	Fold Enrichment	Bonferroni	Benjamini	FDR
INTERPRO	IPR013783:Immunoglobulin-like fold	14	3.67454	8.03675e-05	ENSBTAG00000002069, ENSBTAG00000016208, ENSBTAG00000024947, ENSBTAG00000020116, ENSBTAG00000000603, ENSBTAG00000038288, ENSBTAG00000019386, ENSBTAG00000017846, ENSBTAG00000012208, ENSBTAG00000015565, ENSBTAG00000004043, ENSBTAG00000006343, ENSBTAG00000039932, ENSBTAG00000003826	181	131	6326	3.73514	0.0294554	0.00991648	0.110856
INTERPRO	IPR007110:Immunoglobulin-like	10	2.62467	0.0049824	ENSBTAG00000002069, ENSBTAG00000015565, ENSBTAG00000024947, ENSBTAG00000000603, ENSBTAG00000020116, ENSBTAG00000004043, ENSBTAG00000019386, ENSBTAG00000017846, ENSBTAG00000006343, ENSBTAG00000012208	181	114	6326	3.06581	0.844029	0.186536	6.66102
INTERPRO	IPR013151:Immunoglobulin	6	1.5748	0.0057625	ENSBTAG00000000603, ENSBTAG00000038288, ENSBTAG00000004043, ENSBTAG00000017846, ENSBTAG00000006343, ENSBTAG00000003826	181	41	6326	5.11467	0.883498	0.164023	7.66588
INTERPRO	IPR003599:Immunoglobulin subtype	7	1.83727	0.0206004	ENSBTAG00000024947, ENSBTAG00000000603, ENSBTAG00000038288, ENSBTAG00000004043, ENSBTAG00000017846, ENSBTAG00000006343, ENSBTAG00000039932	181	76	6326	3.2191	0.999566	0.424835	24.969
SMART	SM00409:IG	7	1.83727	0.0293094	ENSBTAG00000024947, ENSBTAG00000000603, ENSBTAG00000038288, ENSBTAG00000004043, ENSBTAG00000017846, ENSBTAG00000006343, ENSBTAG00000039932	92	76	2924	2.92735	0.920225	0.468544	27.3884
Annotation Cluster 6; Enrichment Score: 2.1
Category	Term	Count	%	PValue	Genes	List Total	Pop Hits	Pop Total	Fold Enrichment	Bonferroni	Benjamini	FDR
INTERPRO	IPR013783:Immunoglobulin-like fold	14	3.67454	8.03675e-05	ENSBTAG00000002069, ENSBTAG00000016208, ENSBTAG00000024947, ENSBTAG00000020116, ENSBTAG00000000603, ENSBTAG00000038288, ENSBTAG00000019386, ENSBTAG00000017846, ENSBTAG00000012208, ENSBTAG00000015565, ENSBTAG00000004043, ENSBTAG00000006343, ENSBTAG00000039932, ENSBTAG00000003826	181	131	6326	3.73514	0.0294554	0.00991648	0.110856
INTERPRO	IPR010579:MHC class I, alpha chain, C-terminal	4	1.04987	0.000425388	ENSBTAG00000002069, ENSBTAG00000020116, ENSBTAG00000019386, ENSBTAG00000012208	181	6	6326	23.3002	0.146388	0.0260348	0.585469
SP_PIR_KEYWORDS	mhc i	4	1.04987	0.000804799	ENSBTAG00000002069, ENSBTAG00000020116, ENSBTAG00000019386, ENSBTAG00000012208	150	7	5056	19.261	0.161652	0.0194007	1.01889
INTERPRO	IPR003006:Immunoglobulin/major histocompatibility complex, conserved site	5	1.31234	0.00367439	ENSBTAG00000002069, ENSBTAG00000015565, ENSBTAG00000020116, ENSBTAG00000019386, ENSBTAG00000012208	181	23	6326	7.59789	0.745738	0.157325	4.95336
GOTERM_BP_FAT	GO:0002474~antigen processing and presentation of peptide antigen via MHC class I	4	1.04987	0.00375076	ENSBTAG00000002069, ENSBTAG00000020116, ENSBTAG00000019386, ENSBTAG00000012208	152	11	4989	11.9354	0.987819	0.240803	5.87808
INTERPRO	IPR007110:Immunoglobulin-like	10	2.62467	0.0049824	ENSBTAG00000002069, ENSBTAG00000015565, ENSBTAG00000024947, ENSBTAG00000000603, ENSBTAG00000020116, ENSBTAG00000004043, ENSBTAG00000019386, ENSBTAG00000017846, ENSBTAG00000006343, ENSBTAG00000012208	181	114	6326	3.06581	0.844029	0.186536	6.66102
INTERPRO	IPR003597:Immunoglobulin C1-set	5	1.31234	0.00502178	ENSBTAG00000002069, ENSBTAG00000015565, ENSBTAG00000020116, ENSBTAG00000019386, ENSBTAG00000012208	181	25	6326	6.99006	0.846309	0.170789	6.71199
INTERPRO	IPR001039:MHC class I, alpha chain, alpha1 and alpha2	4	1.04987	0.00524971	ENSBTAG00000002069, ENSBTAG00000020116, ENSBTAG00000019386, ENSBTAG00000012208	181	13	6326	10.7539	0.858865	0.16306	7.00648
SMART	SM00407:IGc1	5	1.31234	0.00672884	ENSBTAG00000002069, ENSBTAG00000015565, ENSBTAG00000020116, ENSBTAG00000019386, ENSBTAG00000012208	92	25	2924	6.35652	0.436667	0.174111	7.0063
INTERPRO	IPR011161:MHC class I-like antigen recognition	4	1.04987	0.00965438	ENSBTAG00000002069, ENSBTAG00000020116, ENSBTAG00000019386, ENSBTAG00000012208	181	16	6326	8.73757	0.972918	0.242405	12.5309
GOTERM_CC_FAT	GO:0042611~MHC protein complex	5	1.31234	0.013384	ENSBTAG00000002069, ENSBTAG00000015565, ENSBTAG00000020116, ENSBTAG00000019386, ENSBTAG00000012208	130	28	3834	5.26648	0.882631	0.263658	15.0007
GOTERM_BP_FAT	GO:0048002~antigen processing and presentation of peptide antigen	4	1.04987	0.0135317	ENSBTAG00000002069, ENSBTAG00000020116, ENSBTAG00000019386, ENSBTAG00000012208	152	17	4989	7.72291	1	0.472307	19.7186
GOTERM_CC_FAT	GO:0042612~MHC class I protein complex	4	1.04987	0.0243093	ENSBTAG00000002069, ENSBTAG00000020116, ENSBTAG00000019386, ENSBTAG00000012208	130	19	3834	6.20891	0.980018	0.386833	25.6838
GOTERM_BP_FAT	GO:0019882~antigen processing and presentation	5	1.31234	0.0492653	ENSBTAG00000002069, ENSBTAG00000015565, ENSBTAG00000020116, ENSBTAG00000019386, ENSBTAG00000012208	152	46	4989	3.56765	1	0.807203	55.7109
SP_PIR_KEYWORDS	immune response	5	1.31234	0.0818825	ENSBTAG00000002069, ENSBTAG00000020116, ENSBTAG00000019386, ENSBTAG00000014546, ENSBTAG00000012208	150	56	5056	3.00952	1	0.572763	66.2663
KEGG_PATHWAY	bta04514:Cell adhesion molecules (CAMs)	5	1.31234	0.187178	ENSBTAG00000002069, ENSBTAG00000000603, ENSBTAG00000020116, ENSBTAG00000007421, ENSBTAG00000017846	96	70	2949	2.1942	1	0.730864	89.7513
GOTERM_CC_FAT	GO:0044459~plasma membrane part	16	4.19948	0.341578	ENSBTAG00000002069, ENSBTAG00000020116, ENSBTAG00000019386, ENSBTAG00000010532, ENSBTAG00000014546, ENSBTAG00000017846, ENSBTAG00000002006, ENSBTAG00000012208, ENSBTAG00000020554, ENSBTAG00000015565, ENSBTAG00000004247, ENSBTAG00000007421, ENSBTAG00000013755, ENSBTAG00000000820, ENSBTAG00000017564, ENSBTAG00000018432	130	393	3834	1.2007	1	0.988084	99.3531
Annotation Cluster 7; Enrichment Score: 1.9
Category	Term	Count	%	PValue	Genes	List Total	Pop Hits	Pop Total	Fold Enrichment	Bonferroni	Benjamini	FDR
GOTERM_BP_FAT	GO:0006897~endocytosis	8	2.09974	0.00224241	ENSBTAG00000021036, ENSBTAG00000002885, ENSBTAG00000001286, ENSBTAG00000003506, ENSBTAG00000014546, ENSBTAG00000016152, ENSBTAG00000009012, ENSBTAG00000002006	152	61	4989	4.30457	0.928159	0.171462	3.55432
GOTERM_BP_FAT	GO:0010324~membrane invagination	8	2.09974	0.00224241	ENSBTAG00000021036, ENSBTAG00000002885, ENSBTAG00000001286, ENSBTAG00000003506, ENSBTAG00000014546, ENSBTAG00000016152, ENSBTAG00000009012, ENSBTAG00000002006	152	61	4989	4.30457	0.928159	0.171462	3.55432
GOTERM_BP_FAT	GO:0016044~membrane organization	9	2.3622	0.00976143	ENSBTAG00000021036, ENSBTAG00000002885, ENSBTAG00000001286, ENSBTAG00000017574, ENSBTAG00000003506, ENSBTAG00000014546, ENSBTAG00000016152, ENSBTAG00000009012, ENSBTAG00000002006	152	99	4989	2.98385	0.99999	0.421851	14.6266
GOTERM_BP_FAT	GO:0006909~phagocytosis	4	1.04987	0.0184509	ENSBTAG00000001286, ENSBTAG00000014546, ENSBTAG00000009012, ENSBTAG00000002006	152	19	4989	6.90997	1	0.541676	25.9347
GOTERM_BP_FAT	GO:0016192~vesicle-mediated transport	9	2.3622	0.267173	ENSBTAG00000012820, ENSBTAG00000021036, ENSBTAG00000002885, ENSBTAG00000001286, ENSBTAG00000003506, ENSBTAG00000014546, ENSBTAG00000016152, ENSBTAG00000009012, ENSBTAG00000002006	152	202	4989	1.46238	1	0.988282	99.3336
Annotation Cluster 8; Enrichment Score: 1.8
Category	Term	Count	%	PValue	Genes	List Total	Pop Hits	Pop Total	Fold Enrichment	Bonferroni	Benjamini	FDR
GOTERM_CC_FAT	GO:0005615~extracellular space	15	3.93701	6.32324e-06	ENSBTAG00000011961, ENSBTAG00000009812, ENSBTAG00000010155, ENSBTAG00000002006, ENSBTAG00000007191, ENSBTAG00000021565, ENSBTAG00000014541, ENSBTAG00000012855, ENSBTAG00000001321, ENSBTAG00000004982, ENSBTAG00000002885, ENSBTAG00000019612, ENSBTAG00000025250, ENSBTAG00000003806, ENSBTAG00000003835	130	103	3834	4.295	0.00100489	0.000502573	0.00762679
GOTERM_BP_FAT	GO:0042127~regulation of cell proliferation	14	3.67454	0.00227483	ENSBTAG00000031184, ENSBTAG00000001061, ENSBTAG00000001333, ENSBTAG00000010532, ENSBTAG00000002006, ENSBTAG00000014541, ENSBTAG00000002835, ENSBTAG00000008483, ENSBTAG00000001321, ENSBTAG00000007421, ENSBTAG00000019612, ENSBTAG00000008353, ENSBTAG00000013569, ENSBTAG00000003835	152	175	4989	2.62579	0.930846	0.163136	3.60483
GOTERM_BP_FAT	GO:0001568~blood vessel development	6	1.5748	0.0511731	ENSBTAG00000014541, ENSBTAG00000007421, ENSBTAG00000019612, ENSBTAG00000008817, ENSBTAG00000003835, ENSBTAG00000002006	152	67	4989	2.93932	1	0.810868	57.1221
GOTERM_BP_FAT	GO:0001944~vasculature development	6	1.5748	0.0539432	ENSBTAG00000014541, ENSBTAG00000007421, ENSBTAG00000019612, ENSBTAG00000008817, ENSBTAG00000003835, ENSBTAG00000002006	152	68	4989	2.89609	1	0.819448	59.0962
GOTERM_BP_FAT	GO:0001525~angiogenesis	4	1.04987	0.106403	ENSBTAG00000014541, ENSBTAG00000019612, ENSBTAG00000003835, ENSBTAG00000002006	152	38	4989	3.45499	1	0.920956	83.6936
GOTERM_BP_FAT	GO:0032268~regulation of cellular protein metabolic process	7	1.83727	0.167948	ENSBTAG00000014541, ENSBTAG00000001321, ENSBTAG00000001061, ENSBTAG00000019612, ENSBTAG00000003901, ENSBTAG00000003835, ENSBTAG00000002006	152	123	4989	1.86794	1	0.965604	94.8388
GOTERM_BP_FAT	GO:0048514~blood vessel morphogenesis	4	1.04987	0.239659	ENSBTAG00000014541, ENSBTAG00000019612, ENSBTAG00000003835, ENSBTAG00000002006	152	56	4989	2.34445	1	0.984607	98.7929
Annotation Cluster 9; Enrichment Score: 1.7
Category	Term	Count	%	PValue	Genes	List Total	Pop Hits	Pop Total	Fold Enrichment	Bonferroni	Benjamini	FDR
SP_PIR_KEYWORDS	cell membrane	17	4.46194	0.00304123	ENSBTAG00000038141, ENSBTAG00000001242, ENSBTAG00000001061, ENSBTAG00000010238, ENSBTAG00000000616, ENSBTAG00000017846, ENSBTAG00000000585, ENSBTAG00000009873, ENSBTAG00000002348, ENSBTAG00000039682, ENSBTAG00000020990, ENSBTAG00000012855, ENSBTAG00000008483, ENSBTAG00000007421, ENSBTAG00000015094, ENSBTAG00000027126, ENSBTAG00000000820	150	254	5056	2.25596	0.486777	0.0408332	3.80026
SP_PIR_KEYWORDS	gpi-anchor	4	1.04987	0.00879613	ENSBTAG00000000585, ENSBTAG00000009873, ENSBTAG00000012855, ENSBTAG00000015094	150	15	5056	8.98844	0.855557	0.101917	10.6297
GOTERM_CC_FAT	GO:0031225~anchored to membrane	5	1.31234	0.0589208	ENSBTAG00000000585, ENSBTAG00000009873, ENSBTAG00000003454, ENSBTAG00000012855, ENSBTAG00000015094	130	44	3834	3.3514	0.999936	0.619236	51.9293
SP_PIR_KEYWORDS	lipoprotein	7	1.83727	0.1499	ENSBTAG00000000585, ENSBTAG00000009873, ENSBTAG00000003454, ENSBTAG00000012855, ENSBTAG00000001242, ENSBTAG00000015094, ENSBTAG00000000820	150	122	5056	1.93399	1	0.772798	87.3278
Annotation Cluster 10; Enrichment Score: 1.2
Category	Term	Count	%	PValue	Genes	List Total	Pop Hits	Pop Total	Fold Enrichment	Bonferroni	Benjamini	FDR
GOTERM_BP_FAT	GO:0016337~cell-cell adhesion	5	1.31234	0.0267884	ENSBTAG00000024947, ENSBTAG00000007421, ENSBTAG00000015094, ENSBTAG00000021964, ENSBTAG00000014546	152	38	4989	4.31873	1	0.654136	35.4508
GOTERM_BP_FAT	GO:0007155~cell adhesion	9	2.3622	0.0334459	ENSBTAG00000024947, ENSBTAG00000007421, ENSBTAG00000013755, ENSBTAG00000015094, ENSBTAG00000000793, ENSBTAG00000021964, ENSBTAG00000014546, ENSBTAG00000017846, ENSBTAG00000002006	152	124	4989	2.38227	1	0.712627	42.2127
GOTERM_BP_FAT	GO:0022610~biological adhesion	9	2.3622	0.0334459	ENSBTAG00000024947, ENSBTAG00000007421, ENSBTAG00000013755, ENSBTAG00000015094, ENSBTAG00000000793, ENSBTAG00000021964, ENSBTAG00000014546, ENSBTAG00000017846, ENSBTAG00000002006	152	124	4989	2.38227	1	0.712627	42.2127
GOTERM_CC_FAT	GO:0044459~plasma membrane part	16	4.19948	0.341578	ENSBTAG00000002069, ENSBTAG00000020116, ENSBTAG00000019386, ENSBTAG00000010532, ENSBTAG00000014546, ENSBTAG00000017846, ENSBTAG00000002006, ENSBTAG00000012208, ENSBTAG00000020554, ENSBTAG00000015565, ENSBTAG00000004247, ENSBTAG00000007421, ENSBTAG00000013755, ENSBTAG00000000820, ENSBTAG00000017564, ENSBTAG00000018432	130	393	3834	1.2007	1	0.988084	99.3531
Annotation Cluster 11; Enrichment Score: 1.2
Category	Term	Count	%	PValue	Genes	List Total	Pop Hits	Pop Total	Fold Enrichment	Bonferroni	Benjamini	FDR
GOTERM_BP_FAT	GO:0008285~negative regulation of cell proliferation	10	2.62467	0.000311447	ENSBTAG00000001321, ENSBTAG00000031184, ENSBTAG00000002835, ENSBTAG00000007421, ENSBTAG00000001061, ENSBTAG00000001333, ENSBTAG00000019612, ENSBTAG00000008353, ENSBTAG00000003835, ENSBTAG00000002006	152	73	4989	4.49621	0.30607	0.0508589	0.5009
GOTERM_BP_FAT	GO:0033673~negative regulation of kinase activity	6	1.5748	0.00183661	ENSBTAG00000004394, ENSBTAG00000001321, ENSBTAG00000031184, ENSBTAG00000003033, ENSBTAG00000001061, ENSBTAG00000008353	152	30	4989	6.56447	0.88425	0.152844	2.92002
GOTERM_BP_FAT	GO:0051348~negative regulation of transferase activity	6	1.5748	0.00183661	ENSBTAG00000004394, ENSBTAG00000001321, ENSBTAG00000031184, ENSBTAG00000003033, ENSBTAG00000001061, ENSBTAG00000008353	152	30	4989	6.56447	0.88425	0.152844	2.92002
GOTERM_BP_FAT	GO:0042127~regulation of cell proliferation	14	3.67454	0.00227483	ENSBTAG00000031184, ENSBTAG00000001061, ENSBTAG00000001333, ENSBTAG00000010532, ENSBTAG00000002006, ENSBTAG00000014541, ENSBTAG00000002835, ENSBTAG00000008483, ENSBTAG00000001321, ENSBTAG00000007421, ENSBTAG00000019612, ENSBTAG00000008353, ENSBTAG00000013569, ENSBTAG00000003835	152	175	4989	2.62579	0.930846	0.163136	3.60483
GOTERM_BP_FAT	GO:0043086~negative regulation of catalytic activity	7	1.83727	0.00407112	ENSBTAG00000011374, ENSBTAG00000004394, ENSBTAG00000001321, ENSBTAG00000031184, ENSBTAG00000003033, ENSBTAG00000001061, ENSBTAG00000008353	152	51	4989	4.50503	0.991647	0.245334	6.36482
GOTERM_BP_FAT	GO:0000165~MAPKKK cascade	6	1.5748	0.00532679	ENSBTAG00000001321, ENSBTAG00000002835, ENSBTAG00000003033, ENSBTAG00000001061, ENSBTAG00000006161, ENSBTAG00000002006	152	38	4989	5.18248	0.998098	0.293942	8.24996
GOTERM_BP_FAT	GO:0006469~negative regulation of protein kinase activity	5	1.31234	0.00822506	ENSBTAG00000004394, ENSBTAG00000001321, ENSBTAG00000003033, ENSBTAG00000001061, ENSBTAG00000008353	152	27	4989	6.07822	0.999938	0.399438	12.4661
GOTERM_BP_FAT	GO:0042325~regulation of phosphorylation	10	2.62467	0.0105783	ENSBTAG00000004394, ENSBTAG00000014541, ENSBTAG00000001321, ENSBTAG00000031184, ENSBTAG00000003033, ENSBTAG00000001061, ENSBTAG00000008353, ENSBTAG00000006161, ENSBTAG00000003835, ENSBTAG00000002006	152	121	4989	2.71259	0.999996	0.418628	15.7549
KEGG_PATHWAY	bta04510:Focal adhesion	10	2.62467	0.0112692	ENSBTAG00000014541, ENSBTAG00000013755, ENSBTAG00000011473, ENSBTAG00000001061, ENSBTAG00000000793, ENSBTAG00000007173, ENSBTAG00000017970, ENSBTAG00000006161, ENSBTAG00000008817, ENSBTAG00000002006	96	116	2949	2.64817	0.659264	0.301544	11.7127
GOTERM_BP_FAT	GO:0019220~regulation of phosphate metabolic process	10	2.62467	0.0129298	ENSBTAG00000004394, ENSBTAG00000014541, ENSBTAG00000001321, ENSBTAG00000031184, ENSBTAG00000003033, ENSBTAG00000001061, ENSBTAG00000008353, ENSBTAG00000006161, ENSBTAG00000003835, ENSBTAG00000002006	152	125	4989	2.62579	1	0.470629	18.9253
GOTERM_BP_FAT	GO:0051174~regulation of phosphorus metabolic process	10	2.62467	0.0129298	ENSBTAG00000004394, ENSBTAG00000014541, ENSBTAG00000001321, ENSBTAG00000031184, ENSBTAG00000003033, ENSBTAG00000001061, ENSBTAG00000008353, ENSBTAG00000006161, ENSBTAG00000003835, ENSBTAG00000002006	152	125	4989	2.62579	1	0.470629	18.9253
GOTERM_BP_FAT	GO:0043549~regulation of kinase activity	8	2.09974	0.0165837	ENSBTAG00000004394, ENSBTAG00000001321, ENSBTAG00000031184, ENSBTAG00000003033, ENSBTAG00000001061, ENSBTAG00000008353, ENSBTAG00000006161, ENSBTAG00000002006	152	88	4989	2.98385	1	0.529733	23.6304
GOTERM_BP_FAT	GO:0044092~negative regulation of molecular function	7	1.83727	0.0173879	ENSBTAG00000011374, ENSBTAG00000004394, ENSBTAG00000001321, ENSBTAG00000031184, ENSBTAG00000003033, ENSBTAG00000001061, ENSBTAG00000008353	152	69	4989	3.32981	1	0.533293	24.631
GOTERM_BP_FAT	GO:0051338~regulation of transferase activity	8	2.09974	0.0185689	ENSBTAG00000004394, ENSBTAG00000001321, ENSBTAG00000031184, ENSBTAG00000003033, ENSBTAG00000001061, ENSBTAG00000008353, ENSBTAG00000006161, ENSBTAG00000002006	152	90	4989	2.91754	1	0.531464	26.0782
GOTERM_BP_FAT	GO:0045859~regulation of protein kinase activity	7	1.83727	0.0369718	ENSBTAG00000004394, ENSBTAG00000001321, ENSBTAG00000003033, ENSBTAG00000001061, ENSBTAG00000008353, ENSBTAG00000006161, ENSBTAG00000002006	152	82	4989	2.80191	1	0.737916	45.5189
GOTERM_BP_FAT	GO:0032270~positive regulation of cellular protein metabolic process	5	1.31234	0.0561162	ENSBTAG00000001321, ENSBTAG00000001061, ENSBTAG00000003901, ENSBTAG00000003835, ENSBTAG00000002006	152	48	4989	3.419	1	0.816141	60.5848
KEGG_PATHWAY	bta05200:Pathways in cancer	12	3.14961	0.0607097	ENSBTAG00000014541, ENSBTAG00000001061, ENSBTAG00000001333, ENSBTAG00000000793, ENSBTAG00000007173, ENSBTAG00000018572, ENSBTAG00000002283, ENSBTAG00000008353, ENSBTAG00000006161, ENSBTAG00000034220, ENSBTAG00000008817, ENSBTAG00000003835	96	204	2949	1.80699	0.997394	0.57258	49.764
GOTERM_BP_FAT	GO:0051247~positive regulation of protein metabolic process	5	1.31234	0.0673035	ENSBTAG00000001321, ENSBTAG00000001061, ENSBTAG00000003901, ENSBTAG00000003835, ENSBTAG00000002006	152	51	4989	3.21788	1	0.857147	67.4773
GOTERM_BP_FAT	GO:0043405~regulation of MAP kinase activity	4	1.04987	0.0711502	ENSBTAG00000001321, ENSBTAG00000001061, ENSBTAG00000006161, ENSBTAG00000002006	152	32	4989	4.1028	1	0.866469	69.5735
GOTERM_BP_FAT	GO:0043085~positive regulation of catalytic activity	7	1.83727	0.0876976	ENSBTAG00000001321, ENSBTAG00000008483, ENSBTAG00000003033, ENSBTAG00000001242, ENSBTAG00000019612, ENSBTAG00000006161, ENSBTAG00000002006	152	102	4989	2.25252	1	0.898803	77.228
GOTERM_BP_FAT	GO:0007243~protein kinase cascade	6	1.5748	0.090034	ENSBTAG00000001321, ENSBTAG00000002835, ENSBTAG00000003033, ENSBTAG00000001061, ENSBTAG00000006161, ENSBTAG00000002006	152	79	4989	2.49284	1	0.900304	78.1501
GOTERM_BP_FAT	GO:0032269~negative regulation of cellular protein metabolic process	4	1.04987	0.119421	ENSBTAG00000001061, ENSBTAG00000019612, ENSBTAG00000003901, ENSBTAG00000002006	152	40	4989	3.28224	1	0.933616	87.1289
GOTERM_BP_FAT	GO:0051248~negative regulation of protein metabolic process	4	1.04987	0.126141	ENSBTAG00000001061, ENSBTAG00000019612, ENSBTAG00000003901, ENSBTAG00000002006	152	41	4989	3.20218	1	0.940653	88.6243
GOTERM_BP_FAT	GO:0044093~positive regulation of molecular function	7	1.83727	0.15924	ENSBTAG00000001321, ENSBTAG00000008483, ENSBTAG00000003033, ENSBTAG00000001242, ENSBTAG00000019612, ENSBTAG00000006161, ENSBTAG00000002006	152	121	4989	1.89881	1	0.962429	93.8955
KEGG_PATHWAY	bta04010:MAPK signaling pathway	9	2.3622	0.163012	ENSBTAG00000014541, ENSBTAG00000001321, ENSBTAG00000003033, ENSBTAG00000001497, ENSBTAG00000001061, ENSBTAG00000007173, ENSBTAG00000015311, ENSBTAG00000006343, ENSBTAG00000020350	96	166	2949	1.66547	1	0.72757	85.8575
GOTERM_BP_FAT	GO:0032268~regulation of cellular protein metabolic process	7	1.83727	0.167948	ENSBTAG00000014541, ENSBTAG00000001321, ENSBTAG00000001061, ENSBTAG00000019612, ENSBTAG00000003901, ENSBTAG00000003835, ENSBTAG00000002006	152	123	4989	1.86794	1	0.965604	94.8388
GOTERM_BP_FAT	GO:0010604~positive regulation of macromolecule metabolic process	10	2.62467	0.18098	ENSBTAG00000032132, ENSBTAG00000014541, ENSBTAG00000001321, ENSBTAG00000002835, ENSBTAG00000008313, ENSBTAG00000001061, ENSBTAG00000001333, ENSBTAG00000003901, ENSBTAG00000003835, ENSBTAG00000002006	152	209	4989	1.57045	1	0.969661	95.9985
GOTERM_BP_FAT	GO:0045860~positive regulation of protein kinase activity	4	1.04987	0.184207	ENSBTAG00000001321, ENSBTAG00000003033, ENSBTAG00000006161, ENSBTAG00000002006	152	49	4989	2.67938	1	0.970163	96.2452
GOTERM_BP_FAT	GO:0033674~positive regulation of kinase activity	4	1.04987	0.207566	ENSBTAG00000001321, ENSBTAG00000003033, ENSBTAG00000006161, ENSBTAG00000002006	152	52	4989	2.5248	1	0.978583	97.6493
GOTERM_BP_FAT	GO:0051347~positive regulation of transferase activity	4	1.04987	0.223495	ENSBTAG00000001321, ENSBTAG00000003033, ENSBTAG00000006161, ENSBTAG00000002006	152	54	4989	2.43129	1	0.98186	98.3056
GOTERM_BP_FAT	GO:0010605~negative regulation of macromolecule metabolic process	8	2.09974	0.302734	ENSBTAG00000031184, ENSBTAG00000001061, ENSBTAG00000001333, ENSBTAG00000019612, ENSBTAG00000003901, ENSBTAG00000002333, ENSBTAG00000003835, ENSBTAG00000002006	152	180	4989	1.45877	1	0.992688	99.7012
GOTERM_BP_FAT	GO:0007242~intracellular signaling cascade	12	3.14961	0.502273	ENSBTAG00000011374, ENSBTAG00000001321, ENSBTAG00000002835, ENSBTAG00000008483, ENSBTAG00000016739, ENSBTAG00000003033, ENSBTAG00000001242, ENSBTAG00000001497, ENSBTAG00000001061, ENSBTAG00000020520, ENSBTAG00000006161, ENSBTAG00000002006	152	352	4989	1.11894	1	0.999646	99.9987
GOTERM_BP_FAT	GO:0051726~regulation of cell cycle	4	1.04987	0.524008	ENSBTAG00000001321, ENSBTAG00000003033, ENSBTAG00000008353, ENSBTAG00000003835	152	91	4989	1.44274	1	0.99975	99.9994
GOTERM_BP_FAT	GO:0009967~positive regulation of signal transduction	4	1.04987	0.531447	ENSBTAG00000001321, ENSBTAG00000031184, ENSBTAG00000003835, ENSBTAG00000002006	152	92	4989	1.42706	1	0.999773	99.9995
GOTERM_BP_FAT	GO:0010647~positive regulation of cell communication	4	1.04987	0.546129	ENSBTAG00000001321, ENSBTAG00000031184, ENSBTAG00000003835, ENSBTAG00000002006	152	94	4989	1.3967	1	0.999827	99.9997
GOTERM_BP_FAT	GO:0010941~regulation of cell death	6	1.5748	0.819539	ENSBTAG00000001321, ENSBTAG00000001061, ENSBTAG00000015094, ENSBTAG00000008353, ENSBTAG00000008625, ENSBTAG00000003835	152	225	4989	0.875263	1	1	100
GOTERM_BP_FAT	GO:0006793~phosphorus metabolic process	12	3.14961	0.825346	ENSBTAG00000040559, ENSBTAG00000001321, ENSBTAG00000005828, ENSBTAG00000003033, ENSBTAG00000001061, ENSBTAG00000007173, ENSBTAG00000018572, ENSBTAG00000015311, ENSBTAG00000015296, ENSBTAG00000020350, ENSBTAG00000006161, ENSBTAG00000002006	152	455	4989	0.865645	1	1	100
GOTERM_BP_FAT	GO:0006796~phosphate metabolic process	12	3.14961	0.825346	ENSBTAG00000040559, ENSBTAG00000001321, ENSBTAG00000005828, ENSBTAG00000003033, ENSBTAG00000001061, ENSBTAG00000007173, ENSBTAG00000018572, ENSBTAG00000015311, ENSBTAG00000015296, ENSBTAG00000020350, ENSBTAG00000006161, ENSBTAG00000002006	152	455	4989	0.865645	1	1	100
GOTERM_BP_FAT	GO:0006468~protein amino acid phosphorylation	8	2.09974	0.836117	ENSBTAG00000001321, ENSBTAG00000005828, ENSBTAG00000003033, ENSBTAG00000001061, ENSBTAG00000007173, ENSBTAG00000018572, ENSBTAG00000006161, ENSBTAG00000002006	152	309	4989	0.84977	1	1	100
GOTERM_BP_FAT	GO:0016310~phosphorylation	8	2.09974	0.939267	ENSBTAG00000001321, ENSBTAG00000005828, ENSBTAG00000003033, ENSBTAG00000001061, ENSBTAG00000007173, ENSBTAG00000018572, ENSBTAG00000006161, ENSBTAG00000002006	152	370	4989	0.709673	1	1	100
Annotation Cluster 12; Enrichment Score: 1.2
Category	Term	Count	%	PValue	Genes	List Total	Pop Hits	Pop Total	Fold Enrichment	Bonferroni	Benjamini	FDR
GOTERM_BP_FAT	GO:0030323~respiratory tube development	4	1.04987	0.0467542	ENSBTAG00000014541, ENSBTAG00000007173, ENSBTAG00000002333, ENSBTAG00000003835	152	27	4989	4.86257	1	0.79906	53.787
GOTERM_BP_FAT	GO:0060541~respiratory system development	4	1.04987	0.0467542	ENSBTAG00000014541, ENSBTAG00000007173, ENSBTAG00000002333, ENSBTAG00000003835	152	27	4989	4.86257	1	0.79906	53.787
GOTERM_BP_FAT	GO:0030324~lung development	4	1.04987	0.0467542	ENSBTAG00000014541, ENSBTAG00000007173, ENSBTAG00000002333, ENSBTAG00000003835	152	27	4989	4.86257	1	0.79906	53.787
GOTERM_BP_FAT	GO:0035295~tube development	4	1.04987	0.215499	ENSBTAG00000014541, ENSBTAG00000007173, ENSBTAG00000002333, ENSBTAG00000003835	152	53	4989	2.47716	1	0.979757	98.0013
Annotation Cluster 13, Enrichment Score: 1.1
Category	Term	Count	%	PValue	Genes	List Total	Pop Hits	Pop Total	Fold Enrichment	Bonferroni	Benjamini	FDR
GOTERM_BP_FAT	GO:0042127~regulation of cell proliferation	14	3.67454	0.00227483	ENSBTAG00000031184, ENSBTAG00000001061, ENSBTAG00000001333, ENSBTAG00000010532, ENSBTAG00000002006, ENSBTAG00000014541, ENSBTAG00000002835, ENSBTAG00000008483, ENSBTAG00000001321, ENSBTAG00000007421, ENSBTAG00000019612, ENSBTAG00000008353, ENSBTAG00000013569, ENSBTAG00000003835	152	175	4989	2.62579	0.930846	0.163136	3.60483
GOTERM_BP_FAT	GO:0050865~regulation of cell activation	6	1.5748	0.0757295	ENSBTAG00000014541, ENSBTAG00000001321, ENSBTAG00000015094, ENSBTAG00000008353, ENSBTAG00000013569, ENSBTAG00000002006	152	75	4989	2.62579	1	0.87162	71.9036
GOTERM_BP_FAT	GO:0002696~positive regulation of leukocyte activation	5	1.31234	0.0928467	ENSBTAG00000001321, ENSBTAG00000015094, ENSBTAG00000008353, ENSBTAG00000013569, ENSBTAG00000002006	152	57	4989	2.87916	1	0.902965	79.2138
GOTERM_BP_FAT	GO:0050867~positive regulation of cell activation	5	1.31234	0.102255	ENSBTAG00000001321, ENSBTAG00000015094, ENSBTAG00000008353, ENSBTAG00000013569, ENSBTAG00000002006	152	59	4989	2.78156	1	0.920389	82.4294
GOTERM_BP_FAT	GO:0002684~positive regulation of immune system process	7	1.83727	0.104424	ENSBTAG00000001321, ENSBTAG00000020602, ENSBTAG00000015094, ENSBTAG00000008353, ENSBTAG00000014546, ENSBTAG00000013569, ENSBTAG00000002006	152	107	4989	2.14726	1	0.920868	83.1016
GOTERM_BP_FAT	GO:0002694~regulation of leukocyte activation	5	1.31234	0.172854	ENSBTAG00000001321, ENSBTAG00000015094, ENSBTAG00000008353, ENSBTAG00000013569, ENSBTAG00000002006	152	72	4989	2.27933	1	0.96744	95.308
GOTERM_BP_FAT	GO:0051251~positive regulation of lymphocyte activation	4	1.04987	0.199703	ENSBTAG00000001321, ENSBTAG00000015094, ENSBTAG00000008353, ENSBTAG00000013569	152	51	4989	2.5743	1	0.97608	97.2437
GOTERM_BP_FAT	GO:0051249~regulation of lymphocyte activation	4	1.04987	0.305839	ENSBTAG00000001321, ENSBTAG00000015094, ENSBTAG00000008353, ENSBTAG00000013569	152	64	4989	2.0514	1	0.992715	99.7219
Annotation Cluster 14; Enrichment Score: 0.9
Category	Term	Count	%	PValue	Genes	List Total	Pop Hits	Pop Total	Fold Enrichment	Bonferroni	Benjamini	FDR
GOTERM_MF_FAT	GO:0005261~cation channel activity	6	1.5748	0.0279006	ENSBTAG00000019355, ENSBTAG00000011873, ENSBTAG00000010532, ENSBTAG00000008294, ENSBTAG00000025642, ENSBTAG00000003826	151	59	5145	3.46504	0.999944	0.663067	32.047
GOTERM_MF_FAT	GO:0046873~metal ion transmembrane transporter activity	7	1.83727	0.0368223	ENSBTAG00000019355, ENSBTAG00000011873, ENSBTAG00000010532, ENSBTAG00000008294, ENSBTAG00000000945, ENSBTAG00000025642, ENSBTAG00000003826	151	85	5145	2.806	0.999998	0.72695	40.0848
GOTERM_MF_FAT	GO:0005267~potassium channel activity	4	1.04987	0.0753272	ENSBTAG00000019355, ENSBTAG00000011873, ENSBTAG00000010532, ENSBTAG00000008294	151	34	5145	4.00857	1	0.89545	65.6742
GOTERM_BP_FAT	GO:0030001~metal ion transport	8	2.09974	0.110473	ENSBTAG00000019355, ENSBTAG00000002348, ENSBTAG00000011873, ENSBTAG00000010532, ENSBTAG00000008294, ENSBTAG00000000945, ENSBTAG00000025642, ENSBTAG00000003826	152	134	4989	1.95954	1	0.925047	84.8504
GOTERM_MF_FAT	GO:0005216~ion channel activity	6	1.5748	0.117115	ENSBTAG00000019355, ENSBTAG00000011873, ENSBTAG00000010532, ENSBTAG00000008294, ENSBTAG00000025642, ENSBTAG00000003826	151	89	5145	2.29705	1	0.932364	81.7439
GOTERM_MF_FAT	GO:0022838~substrate specific channel activity	6	1.5748	0.117115	ENSBTAG00000019355, ENSBTAG00000011873, ENSBTAG00000010532, ENSBTAG00000008294, ENSBTAG00000025642, ENSBTAG00000003826	151	89	5145	2.29705	1	0.932364	81.7439
GOTERM_BP_FAT	GO:0006813~potassium ion transport	4	1.04987	0.119421	ENSBTAG00000019355, ENSBTAG00000011873, ENSBTAG00000010532, ENSBTAG00000008294	152	40	4989	3.28224	1	0.933616	87.1289
GOTERM_MF_FAT	GO:0022803~passive transmembrane transporter activity	6	1.5748	0.125475	ENSBTAG00000019355, ENSBTAG00000011873, ENSBTAG00000010532, ENSBTAG00000008294, ENSBTAG00000025642, ENSBTAG00000003826	151	91	5145	2.24656	1	0.934703	83.9678
GOTERM_MF_FAT	GO:0015267~channel activity	6	1.5748	0.125475	ENSBTAG00000019355, ENSBTAG00000011873, ENSBTAG00000010532, ENSBTAG00000008294, ENSBTAG00000025642, ENSBTAG00000003826	151	91	5145	2.24656	1	0.934703	83.9678
GOTERM_MF_FAT	GO:0022836~gated channel activity	5	1.31234	0.130554	ENSBTAG00000011873, ENSBTAG00000010532, ENSBTAG00000008294, ENSBTAG00000025642, ENSBTAG00000003826	151	67	5145	2.54275	1	0.932062	85.1934
GOTERM_MF_FAT	GO:0005244~voltage-gated ion channel activity	4	1.04987	0.149392	ENSBTAG00000011873, ENSBTAG00000010532, ENSBTAG00000008294, ENSBTAG00000003826	151	46	5145	2.96286	1	0.930464	89.0209
GOTERM_MF_FAT	GO:0022832~voltage-gated channel activity	4	1.04987	0.149392	ENSBTAG00000011873, ENSBTAG00000010532, ENSBTAG00000008294, ENSBTAG00000003826	151	46	5145	2.96286	1	0.930464	89.0209
GOTERM_BP_FAT	GO:0015672~monovalent inorganic cation transport	6	1.5748	0.195431	ENSBTAG00000019355, ENSBTAG00000002348, ENSBTAG00000011873, ENSBTAG00000010532, ENSBTAG00000008294, ENSBTAG00000003826	152	102	4989	1.93073	1	0.975193	96.9967
GOTERM_BP_FAT	GO:0006812~cation transport	8	2.09974	0.312515	ENSBTAG00000019355, ENSBTAG00000002348, ENSBTAG00000011873, ENSBTAG00000010532, ENSBTAG00000008294, ENSBTAG00000000945, ENSBTAG00000025642, ENSBTAG00000003826	152	182	4989	1.44274	1	0.993227	99.762
GOTERM_BP_FAT	GO:0006811~ion transport	8	2.09974	0.582494	ENSBTAG00000019355, ENSBTAG00000002348, ENSBTAG00000011873, ENSBTAG00000010532, ENSBTAG00000008294, ENSBTAG00000000945, ENSBTAG00000025642, ENSBTAG00000003826	152	237	4989	1.10793	1	0.999902	99.9999
Annotation Cluster 15; Enrichment Score: 0.9
Category	Term	Count	%	PValue	Genes	List Total	Pop Hits	Pop Total	Fold Enrichment	Bonferroni	Benjamini	FDR
SP_PIR_KEYWORDS	calcium	14	3.67454	0.000881313	ENSBTAG00000008868, ENSBTAG00000016208, ENSBTAG00000001580, ENSBTAG00000005163, ENSBTAG00000011473, ENSBTAG00000001061, ENSBTAG00000020178, ENSBTAG00000002006, ENSBTAG00000020554, ENSBTAG00000021565, ENSBTAG00000009836, ENSBTAG00000007421, ENSBTAG00000012338, ENSBTAG00000021964	150	162	5056	2.91292	0.175594	0.019124	1.11526
UP_SEQ_FEATURE	metal ion-binding site:Calcium	4	1.04987	0.00153333	ENSBTAG00000016208, ENSBTAG00000021565, ENSBTAG00000012338, ENSBTAG00000020178	112	9	4012	15.9206	0.414648	0.101572	2.07597
GOTERM_MF_FAT	GO:0005509~calcium ion binding	17	4.46194	0.00166751	ENSBTAG00000008868, ENSBTAG00000016208, ENSBTAG00000001580, ENSBTAG00000005163, ENSBTAG00000011473, ENSBTAG00000001061, ENSBTAG00000020178, ENSBTAG00000008248, ENSBTAG00000025642, ENSBTAG00000002006, ENSBTAG00000020554, ENSBTAG00000021565, ENSBTAG00000009836, ENSBTAG00000007421, ENSBTAG00000038981, ENSBTAG00000012338, ENSBTAG00000021964	151	242	5145	2.39355	0.438666	0.0791805	2.25285
INTERPRO	IPR011992:EF-Hand type	5	1.31234	0.216449	ENSBTAG00000008868, ENSBTAG00000020554, ENSBTAG00000005163, ENSBTAG00000011473, ENSBTAG00000008248	181	84	6326	2.08037	1	0.99764	96.5481
INTERPRO	IPR018247:EF-HAND 1	4	1.04987	0.368053	ENSBTAG00000008868, ENSBTAG00000020554, ENSBTAG00000005163, ENSBTAG00000011473	181	76	6326	1.83949	1	0.999977	99.8225
INTERPRO	IPR018249:EF-HAND 2	4	1.04987	0.375858	ENSBTAG00000008868, ENSBTAG00000020554, ENSBTAG00000005163, ENSBTAG00000011473	181	77	6326	1.8156	1	0.999967	99.8505
GOTERM_MF_FAT	GO:0046872~metal ion binding	44	11.5486	0.474088	ENSBTAG00000016208, ENSBTAG00000020602, ENSBTAG00000011473, ENSBTAG00000001061, ENSBTAG00000011182, ENSBTAG00000037644, ENSBTAG00000003901, ENSBTAG00000016761, ENSBTAG00000015743, ENSBTAG00000008294, ENSBTAG00000017970, ENSBTAG00000002006, ENSBTAG00000006662, ENSBTAG00000021565, ENSBTAG00000013496, ENSBTAG00000003763, ENSBTAG00000002348, ENSBTAG00000007421, ENSBTAG00000038981, ENSBTAG00000006683,…	151	1448	5145	1.03536	1	0.99904	99.9845
GOTERM_MF_FAT	GO:0043169~cation binding	44	11.5486	0.51692	ENSBTAG00000016208, ENSBTAG00000020602, ENSBTAG00000011473, ENSBTAG00000001061, ENSBTAG00000011182, ENSBTAG00000037644, ENSBTAG00000003901, ENSBTAG00000016761, ENSBTAG00000015743, ENSBTAG00000008294, ENSBTAG00000017970, ENSBTAG00000002006, ENSBTAG00000006662, ENSBTAG00000021565, ENSBTAG00000013496, ENSBTAG00000003763, ENSBTAG00000002348, ENSBTAG00000007421, ENSBTAG00000038981, ENSBTAG00000006683,…	151	1468	5145	1.02126	1	0.999391	99.9951
GOTERM_MF_FAT	GO:0043167~ion binding	44	11.5486	0.533959	ENSBTAG00000016208, ENSBTAG00000020602, ENSBTAG00000011473, ENSBTAG00000001061, ENSBTAG00000011182, ENSBTAG00000037644, ENSBTAG00000003901, ENSBTAG00000016761, ENSBTAG00000015743, ENSBTAG00000008294, ENSBTAG00000017970, ENSBTAG00000002006, ENSBTAG00000006662, ENSBTAG00000021565, ENSBTAG00000013496, ENSBTAG00000003763, ENSBTAG00000002348, ENSBTAG00000007421, ENSBTAG00000038981, ENSBTAG00000006683,…	151	1476	5145	1.01572	1	0.999207	99.997
GOTERM_MF_FAT	GO:0046914~transition metal ion binding	26	6.82415	0.93335	ENSBTAG00000020602, ENSBTAG00000001061, ENSBTAG00000011182, ENSBTAG00000037644, ENSBTAG00000016761, ENSBTAG00000003901, ENSBTAG00000017970, ENSBTAG00000006662, ENSBTAG00000013496, ENSBTAG00000003763, ENSBTAG00000006683, ENSBTAG00000005163, ENSBTAG00000021036, ENSBTAG00000044194, ENSBTAG00000001333, ENSBTAG00000018513, ENSBTAG00000008248, ENSBTAG00000008625, ENSBTAG00000005017, ENSBTAG00000007917,…	151	1090	5145	0.812747	1	1	100
SP_PIR_KEYWORDS	metal-binding	17	4.46194	0.946772	ENSBTAG00000016208, ENSBTAG00000005163, ENSBTAG00000021036, ENSBTAG00000001061, ENSBTAG00000001333, ENSBTAG00000011182, ENSBTAG00000037644, ENSBTAG00000020178, ENSBTAG00000018513, ENSBTAG00000017970, ENSBTAG00000015743, ENSBTAG00000008625, ENSBTAG00000021565, ENSBTAG00000004247, ENSBTAG00000012338, ENSBTAG00000008943, ENSBTAG00000004674	150	754	5056	0.759965	1	1	100
GOTERM_MF_FAT	GO:0008270~zinc ion binding	20	5.24934	0.954354	ENSBTAG00000005163, ENSBTAG00000021036, ENSBTAG00000044194, ENSBTAG00000001061, ENSBTAG00000001333, ENSBTAG00000011182, ENSBTAG00000018513, ENSBTAG00000003901, ENSBTAG00000008248, ENSBTAG00000017970, ENSBTAG00000008625, ENSBTAG00000005017, ENSBTAG00000006662, ENSBTAG00000013496, ENSBTAG00000003763, ENSBTAG00000007917, ENSBTAG00000004247, ENSBTAG00000008313, ENSBTAG00000006683, ENSBTAG00000008943	151	892	5145	0.763965	1	1	100
SP_PIR_KEYWORDS	zinc	10	2.62467	0.975271	ENSBTAG00000005163, ENSBTAG00000004247, ENSBTAG00000021036, ENSBTAG00000001061, ENSBTAG00000001333, ENSBTAG00000011182, ENSBTAG00000018513, ENSBTAG00000017970, ENSBTAG00000008943, ENSBTAG00000008625	150	518	5056	0.650708	1	1	100
Annotation Cluster 16; Enrichment Score: 0.6
Category	Term	Count	%	PValue	Genes	List Total	Pop Hits	Pop Total	Fold Enrichment	Bonferroni	Benjamini	FDR
GOTERM_BP_FAT	GO:0008285~negative regulation of cell proliferation	10	2.62467	0.000311447	ENSBTAG00000001321, ENSBTAG00000031184, ENSBTAG00000002835, ENSBTAG00000007421, ENSBTAG00000001061, ENSBTAG00000001333, ENSBTAG00000019612, ENSBTAG00000008353, ENSBTAG00000003835, ENSBTAG00000002006	152	73	4989	4.49621	0.30607	0.0508589	0.5009
GOTERM_BP_FAT	GO:0051094~positive regulation of developmental process	9	2.3622	0.00176957	ENSBTAG00000012855, ENSBTAG00000001321, ENSBTAG00000002835, ENSBTAG00000002885, ENSBTAG00000015094, ENSBTAG00000001333, ENSBTAG00000002333, ENSBTAG00000003835, ENSBTAG00000002006	152	75	4989	3.93868	0.874763	0.158971	2.81486
GOTERM_BP_FAT	GO:0042127~regulation of cell proliferation	14	3.67454	0.00227483	ENSBTAG00000031184, ENSBTAG00000001061, ENSBTAG00000001333, ENSBTAG00000010532, ENSBTAG00000002006, ENSBTAG00000014541, ENSBTAG00000002835, ENSBTAG00000008483, ENSBTAG00000001321, ENSBTAG00000007421, ENSBTAG00000019612, ENSBTAG00000008353, ENSBTAG00000013569, ENSBTAG00000003835	152	175	4989	2.62579	0.930846	0.163136	3.60483
GOTERM_BP_FAT	GO:0045597~positive regulation of cell differentiation	7	1.83727	0.0098041	ENSBTAG00000012855, ENSBTAG00000002835, ENSBTAG00000002885, ENSBTAG00000015094, ENSBTAG00000001333, ENSBTAG00000002333, ENSBTAG00000003835	152	61	4989	3.7665	0.99999	0.408632	14.6859
GOTERM_BP_FAT	GO:0031328~positive regulation of cellular biosynthetic process	9	2.3622	0.152417	ENSBTAG00000032132, ENSBTAG00000014541, ENSBTAG00000001321, ENSBTAG00000002835, ENSBTAG00000008313, ENSBTAG00000001333, ENSBTAG00000009012, ENSBTAG00000003835, ENSBTAG00000002006	152	173	4989	1.70752	1	0.960558	93.046
GOTERM_BP_FAT	GO:0009891~positive regulation of biosynthetic process	9	2.3622	0.159432	ENSBTAG00000032132, ENSBTAG00000014541, ENSBTAG00000001321, ENSBTAG00000002835, ENSBTAG00000008313, ENSBTAG00000001333, ENSBTAG00000009012, ENSBTAG00000003835, ENSBTAG00000002006	152	175	4989	1.68801	1	0.960589	93.918
GOTERM_BP_FAT	GO:0010604~positive regulation of macromolecule metabolic process	10	2.62467	0.18098	ENSBTAG00000032132, ENSBTAG00000014541, ENSBTAG00000001321, ENSBTAG00000002835, ENSBTAG00000008313, ENSBTAG00000001061, ENSBTAG00000001333, ENSBTAG00000003901, ENSBTAG00000003835, ENSBTAG00000002006	152	209	4989	1.57045	1	0.969661	95.9985
GOTERM_BP_FAT	GO:0051173~positive regulation of nitrogen compound metabolic process	8	2.09974	0.209862	ENSBTAG00000032132, ENSBTAG00000014541, ENSBTAG00000001321, ENSBTAG00000002835, ENSBTAG00000008313, ENSBTAG00000001333, ENSBTAG00000009012, ENSBTAG00000003835	152	160	4989	1.64112	1	0.978452	97.7567
GOTERM_BP_FAT	GO:0010557~positive regulation of macromolecule biosynthetic process	8	2.09974	0.245734	ENSBTAG00000032132, ENSBTAG00000014541, ENSBTAG00000001321, ENSBTAG00000002835, ENSBTAG00000008313, ENSBTAG00000001333, ENSBTAG00000003835, ENSBTAG00000002006	152	168	4989	1.56297	1	0.985607	98.9393
GOTERM_BP_FAT	GO:0045893~positive regulation of transcription, DNA-dependent	5	1.31234	0.434819	ENSBTAG00000032132, ENSBTAG00000002835, ENSBTAG00000008313, ENSBTAG00000001333, ENSBTAG00000003835	152	111	4989	1.47849	1	0.999192	99.9899
GOTERM_BP_FAT	GO:0051254~positive regulation of RNA metabolic process	5	1.31234	0.434819	ENSBTAG00000032132, ENSBTAG00000002835, ENSBTAG00000008313, ENSBTAG00000001333, ENSBTAG00000003835	152	111	4989	1.47849	1	0.999192	99.9899
GOTERM_BP_FAT	GO:0010628~positive regulation of gene expression	6	1.5748	0.436801	ENSBTAG00000032132, ENSBTAG00000002835, ENSBTAG00000008313, ENSBTAG00000001333, ENSBTAG00000003901, ENSBTAG00000003835	152	143	4989	1.37716	1	0.999166	99.9904
GOTERM_BP_FAT	GO:0042592~homeostatic process	8	2.09974	0.477528	ENSBTAG00000012855, ENSBTAG00000001321, ENSBTAG00000002835, ENSBTAG00000001242, ENSBTAG00000001061, ENSBTAG00000001333, ENSBTAG00000025642, ENSBTAG00000003835	152	215	4989	1.2213	1	0.999468	99.9971
GOTERM_BP_FAT	GO:0045935~positive regulation of nucleobase, nucleoside, nucleotide and nucleic acid metabolic process	6	1.5748	0.501927	ENSBTAG00000032132, ENSBTAG00000014541, ENSBTAG00000002835, ENSBTAG00000008313, ENSBTAG00000001333, ENSBTAG00000003835	152	154	4989	1.27879	1	0.99967	99.9987
GOTERM_BP_FAT	GO:0045944~positive regulation of transcription from RNA polymerase II promoter	4	1.04987	0.516507	ENSBTAG00000032132, ENSBTAG00000002835, ENSBTAG00000001333, ENSBTAG00000003835	152	90	4989	1.45877	1	0.999724	99.9992
GOTERM_MF_FAT	GO:0030528~transcription regulator activity	13	3.41207	0.517811	ENSBTAG00000031184, ENSBTAG00000001333, ENSBTAG00000011182, ENSBTAG00000003901, ENSBTAG00000002333, ENSBTAG00000020713, ENSBTAG00000032132, ENSBTAG00000007917, ENSBTAG00000002835, ENSBTAG00000017661, ENSBTAG00000008313, ENSBTAG00000026769, ENSBTAG00000008943	151	404	5145	1.0964	1	0.999261	99.9953
GOTERM_BP_FAT	GO:0006357~regulation of transcription from RNA polymerase II promoter	6	1.5748	0.564035	ENSBTAG00000032132, ENSBTAG00000031184, ENSBTAG00000002835, ENSBTAG00000001333, ENSBTAG00000002333, ENSBTAG00000003835	152	165	4989	1.19354	1	0.999879	99.9998
GOTERM_BP_FAT	GO:0045941~positive regulation of transcription	5	1.31234	0.606705	ENSBTAG00000032132, ENSBTAG00000002835, ENSBTAG00000008313, ENSBTAG00000001333, ENSBTAG00000003835	152	138	4989	1.18922	1	0.999943	100
GOTERM_MF_FAT	GO:0003700~transcription factor activity	7	1.83727	0.634843	ENSBTAG00000020713, ENSBTAG00000007917, ENSBTAG00000002835, ENSBTAG00000008313, ENSBTAG00000001333, ENSBTAG00000002333, ENSBTAG00000008943	151	222	5145	1.07437	1	0.999869	99.9999
GOTERM_BP_FAT	GO:0006355~regulation of transcription, DNA-dependent	13	3.41207	0.765141	ENSBTAG00000031184, ENSBTAG00000001333, ENSBTAG00000003901, ENSBTAG00000002333, ENSBTAG00000005017, ENSBTAG00000020713, ENSBTAG00000032132, ENSBTAG00000007917, ENSBTAG00000002835, ENSBTAG00000017661, ENSBTAG00000008313, ENSBTAG00000008943, ENSBTAG00000003835	152	466	4989	0.915645	1	0.999999	100
GOTERM_BP_FAT	GO:0051252~regulation of RNA metabolic process	13	3.41207	0.794633	ENSBTAG00000031184, ENSBTAG00000001333, ENSBTAG00000003901, ENSBTAG00000002333, ENSBTAG00000005017, ENSBTAG00000020713, ENSBTAG00000032132, ENSBTAG00000007917, ENSBTAG00000002835, ENSBTAG00000017661, ENSBTAG00000008313, ENSBTAG00000008943, ENSBTAG00000003835	152	478	4989	0.892659	1	1	100
GOTERM_MF_FAT	GO:0043565~sequence-specific DNA binding	4	1.04987	0.812899	ENSBTAG00000020713, ENSBTAG00000007917, ENSBTAG00000001333, ENSBTAG00000002333	151	148	5145	0.920888	1	0.999998	100
GOTERM_BP_FAT	GO:0006350~transcription	9	2.3622	0.90828	ENSBTAG00000032132, ENSBTAG00000002835, ENSBTAG00000017661, ENSBTAG00000001333, ENSBTAG00000015644, ENSBTAG00000006035, ENSBTAG00000019612, ENSBTAG00000002333, ENSBTAG00000008943	152	386	4989	0.765288	1	1	100
GOTERM_BP_FAT	GO:0045449~regulation of transcription	17	4.46194	0.92536	ENSBTAG00000031184, ENSBTAG00000001333, ENSBTAG00000011182, ENSBTAG00000003901, ENSBTAG00000002333, ENSBTAG00000005017, ENSBTAG00000020713, ENSBTAG00000032132, ENSBTAG00000007917, ENSBTAG00000001321, ENSBTAG00000002835, ENSBTAG00000017661, ENSBTAG00000008313, ENSBTAG00000015644, ENSBTAG00000026769, ENSBTAG00000008943, ENSBTAG00000003835	152	709	4989	0.786996	1	1	100
SP_PIR_KEYWORDS	transcription regulation	6	1.5748	0.962221	ENSBTAG00000002835, ENSBTAG00000017661, ENSBTAG00000001333, ENSBTAG00000015644, ENSBTAG00000002333, ENSBTAG00000008943	150	317	5056	0.637981	1	1	100
SP_PIR_KEYWORDS	Transcription	6	1.5748	0.988034	ENSBTAG00000002835, ENSBTAG00000017661, ENSBTAG00000001333, ENSBTAG00000015644, ENSBTAG00000002333, ENSBTAG00000008943	150	372	5056	0.543656	1	1	100
GOTERM_MF_FAT	GO:0003677~DNA binding	10	2.62467	0.996637	ENSBTAG00000020713, ENSBTAG00000007917, ENSBTAG00000002835, ENSBTAG00000017661, ENSBTAG00000008313, ENSBTAG00000001333, ENSBTAG00000003901, ENSBTAG00000002333, ENSBTAG00000026769, ENSBTAG00000008943	151	630	5145	0.540839	1	1	100
SP_PIR_KEYWORDS	nucleus	10	2.62467	1	ENSBTAG00000039682, ENSBTAG00000003454, ENSBTAG00000002835, ENSBTAG00000009737, ENSBTAG00000017661, ENSBTAG00000001333, ENSBTAG00000015644, ENSBTAG00000002333, ENSBTAG00000026769, ENSBTAG00000008943	150	1015	5056	0.332085	1	1	100
Annotation Cluster 17; Enrichment Score: 0.6
Category	Term	Count	%	PValue	Genes	List Total	Pop Hits	Pop Total	Fold Enrichment	Bonferroni	Benjamini	FDR
GOTERM_MF_FAT	GO:0004252~serine-type endopeptidase activity	4	1.04987	0.0862363	ENSBTAG00000021565, ENSBTAG00000021958, ENSBTAG00000021616, ENSBTAG00000002100	151	36	5145	3.78587	1	0.892344	70.809
GOTERM_MF_FAT	GO:0008236~serine-type peptidase activity	4	1.04987	0.142516	ENSBTAG00000021565, ENSBTAG00000021958, ENSBTAG00000021616, ENSBTAG00000002100	151	45	5145	3.0287	1	0.930046	87.7451
GOTERM_MF_FAT	GO:0017171~serine hydrolase activity	4	1.04987	0.149392	ENSBTAG00000021565, ENSBTAG00000021958, ENSBTAG00000021616, ENSBTAG00000002100	151	46	5145	2.96286	1	0.930464	89.0209
GOTERM_MF_FAT	GO:0004175~endopeptidase activity	7	1.83727	0.177954	ENSBTAG00000008868, ENSBTAG00000021565, ENSBTAG00000005078, ENSBTAG00000013366, ENSBTAG00000021958, ENSBTAG00000021616, ENSBTAG00000002100	151	130	5145	1.83469	1	0.954128	93.1128
GOTERM_MF_FAT	GO:0070011~peptidase activity, acting on L-amino acid peptides	9	2.3622	0.211814	ENSBTAG00000006662, ENSBTAG00000008868, ENSBTAG00000013496, ENSBTAG00000021565, ENSBTAG00000005078, ENSBTAG00000013366, ENSBTAG00000021958, ENSBTAG00000021616, ENSBTAG00000002100	151	196	5145	1.56457	1	0.967661	96.1218
GOTERM_MF_FAT	GO:0008233~peptidase activity	9	2.3622	0.247705	ENSBTAG00000006662, ENSBTAG00000008868, ENSBTAG00000013496, ENSBTAG00000021565, ENSBTAG00000005078, ENSBTAG00000013366, ENSBTAG00000021958, ENSBTAG00000021616, ENSBTAG00000002100	151	205	5145	1.49588	1	0.973942	97.9475
SP_PIR_KEYWORDS	Protease	4	1.04987	0.714538	ENSBTAG00000008868, ENSBTAG00000021565, ENSBTAG00000005078, ENSBTAG00000021958	150	124	5056	1.08731	1	0.999962	100
GOTERM_BP_FAT	GO:0006508~proteolysis	9	2.3622	0.867508	ENSBTAG00000008868, ENSBTAG00000013496, ENSBTAG00000021565, ENSBTAG00000021036, ENSBTAG00000005078, ENSBTAG00000013366, ENSBTAG00000021958, ENSBTAG00000021616, ENSBTAG00000002100	152	362	4989	0.816026	1	1	100
Annotation Cluster 18; Enrichment Score: 0.5
Category	Term	Count	%	PValue	Genes	List Total	Pop Hits	Pop Total	Fold Enrichment	Bonferroni	Benjamini	FDR
GOTERM_MF_FAT	GO:0004725~protein tyrosine phosphatase activity	5	1.31234	0.0753766	ENSBTAG00000040559, ENSBTAG00000015311, ENSBTAG00000030749, ENSBTAG00000015296, ENSBTAG00000020350	151	55	5145	3.09753	1	0.875794	65.6992
GOTERM_MF_FAT	GO:0004721~phosphoprotein phosphatase activity	5	1.31234	0.235091	ENSBTAG00000040559, ENSBTAG00000015311, ENSBTAG00000030749, ENSBTAG00000015296, ENSBTAG00000020350	151	85	5145	2.00429	1	0.9755	97.4244
GOTERM_BP_FAT	GO:0006470~protein amino acid dephosphorylation	4	1.04987	0.289142	ENSBTAG00000040559, ENSBTAG00000015311, ENSBTAG00000015296, ENSBTAG00000020350	152	62	4989	2.11757	1	0.990992	99.592
GOTERM_MF_FAT	GO:0016791~phosphatase activity	6	1.5748	0.340641	ENSBTAG00000040559, ENSBTAG00000015311, ENSBTAG00000021616, ENSBTAG00000030749, ENSBTAG00000015296, ENSBTAG00000020350	151	132	5145	1.54877	1	0.990424	99.6608
GOTERM_BP_FAT	GO:0016311~dephosphorylation	4	1.04987	0.42216	ENSBTAG00000040559, ENSBTAG00000015311, ENSBTAG00000015296, ENSBTAG00000020350	152	78	4989	1.6832	1	0.999082	99.9855
GOTERM_BP_FAT	GO:0006793~phosphorus metabolic process	12	3.14961	0.825346	ENSBTAG00000040559, ENSBTAG00000001321, ENSBTAG00000005828, ENSBTAG00000003033, ENSBTAG00000001061, ENSBTAG00000007173, ENSBTAG00000018572, ENSBTAG00000015311, ENSBTAG00000015296, ENSBTAG00000020350, ENSBTAG00000006161, ENSBTAG00000002006	152	455	4989	0.865645	1	1	100
GOTERM_BP_FAT	GO:0006796~phosphate metabolic process	12	3.14961	0.825346	ENSBTAG00000040559, ENSBTAG00000001321, ENSBTAG00000005828, ENSBTAG00000003033, ENSBTAG00000001061, ENSBTAG00000007173, ENSBTAG00000018572, ENSBTAG00000015311, ENSBTAG00000015296, ENSBTAG00000020350, ENSBTAG00000006161, ENSBTAG00000002006	152	455	4989	0.865645	1	1	100
Annotation Cluster 19; Enrichment Score: 0.4
Category	Term	Count	%	PValue	Genes	List Total	Pop Hits	Pop Total	Fold Enrichment	Bonferroni	Benjamini	FDR
SP_PIR_KEYWORDS	microtubule	5	1.31234	0.129042	ENSBTAG00000004472, ENSBTAG00000012030, ENSBTAG00000030973, ENSBTAG00000030974, ENSBTAG00000019822	150	66	5056	2.55354	1	0.731669	82.751
GOTERM_CC_FAT	GO:0044430~cytoskeletal part	12	3.14961	0.142623	ENSBTAG00000020554, ENSBTAG00000004472, ENSBTAG00000003763, ENSBTAG00000015434, ENSBTAG00000013078, ENSBTAG00000007904, ENSBTAG00000012030, ENSBTAG00000020824, ENSBTAG00000030973, ENSBTAG00000030974, ENSBTAG00000017574, ENSBTAG00000017564	130	228	3834	1.55223	1	0.869824	84.3712
GOTERM_MF_FAT	GO:0003774~motor activity	4	1.04987	0.200182	ENSBTAG00000004472, ENSBTAG00000003763, ENSBTAG00000013078, ENSBTAG00000017564	151	53	5145	2.57154	1	0.965274	95.2631
GOTERM_CC_FAT	GO:0005856~cytoskeleton	15	3.93701	0.275459	ENSBTAG00000004472, ENSBTAG00000013078, ENSBTAG00000030973, ENSBTAG00000030974, ENSBTAG00000011182, ENSBTAG00000003763, ENSBTAG00000020554, ENSBTAG00000015434, ENSBTAG00000007904, ENSBTAG00000012030, ENSBTAG00000020824, ENSBTAG00000001286, ENSBTAG00000017574, ENSBTAG00000017564, ENSBTAG00000017063	130	347	3834	1.27488	1	0.98057	97.9484
GOTERM_CC_FAT	GO:0015629~actin cytoskeleton	4	1.04987	0.337766	ENSBTAG00000020554, ENSBTAG00000003763, ENSBTAG00000015434, ENSBTAG00000017564	130	61	3834	1.93392	1	0.990727	99.3065
GOTERM_CC_FAT	GO:0005874~microtubule	4	1.04987	0.465735	ENSBTAG00000004472, ENSBTAG00000012030, ENSBTAG00000030973, ENSBTAG00000030974	130	75	3834	1.57292	1	0.997157	99.948
GOTERM_MF_FAT	GO:0005198~structural molecule activity	7	1.83727	0.511444	ENSBTAG00000007904, ENSBTAG00000020824, ENSBTAG00000030973, ENSBTAG00000030974, ENSBTAG00000040279, ENSBTAG00000017574, ENSBTAG00000002006	151	196	5145	1.21689	1	0.999453	99.9943
GOTERM_CC_FAT	GO:0015630~microtubule cytoskeleton	5	1.31234	0.839696	ENSBTAG00000004472, ENSBTAG00000013078, ENSBTAG00000012030, ENSBTAG00000030973, ENSBTAG00000030974	130	172	3834	0.857335	1	0.999979	100
GOTERM_CC_FAT	GO:0043228~non-membrane-bounded organelle	17	4.46194	0.99541	ENSBTAG00000004472, ENSBTAG00000013078, ENSBTAG00000030973, ENSBTAG00000030974, ENSBTAG00000011182, ENSBTAG00000003901, ENSBTAG00000003763, ENSBTAG00000020554, ENSBTAG00000015434, ENSBTAG00000007904, ENSBTAG00000012030, ENSBTAG00000020824, ENSBTAG00000017574, ENSBTAG00000001286, ENSBTAG00000019612, ENSBTAG00000017564, ENSBTAG00000017063	130	793	3834	0.632244	1	1	100
GOTERM_CC_FAT	GO:0043232~intracellular non-membrane-bounded organelle	17	4.46194	0.99541	ENSBTAG00000004472, ENSBTAG00000013078, ENSBTAG00000030973, ENSBTAG00000030974, ENSBTAG00000011182, ENSBTAG00000003901, ENSBTAG00000003763, ENSBTAG00000020554, ENSBTAG00000015434, ENSBTAG00000007904, ENSBTAG00000012030, ENSBTAG00000020824, ENSBTAG00000017574, ENSBTAG00000001286, ENSBTAG00000019612, ENSBTAG00000017564, ENSBTAG00000017063	130	793	3834	0.632244	1	1	100
Annotation Cluster 20; Enrichment Score: 0.3
Category	Term	Count	%	PValue	Genes	List Total	Pop Hits	Pop Total	Fold Enrichment	Bonferroni	Benjamini	FDR
GOTERM_BP_FAT	GO:0010604~positive regulation of macromolecule metabolic process	10	2.62467	0.18098	ENSBTAG00000032132, ENSBTAG00000014541, ENSBTAG00000001321, ENSBTAG00000002835, ENSBTAG00000008313, ENSBTAG00000001061, ENSBTAG00000001333, ENSBTAG00000003901, ENSBTAG00000003835, ENSBTAG00000002006	152	209	4989	1.57045	1	0.969661	95.9985
GOTERM_MF_FAT	GO:0016564~transcription repressor activity	4	1.04987	0.294261	ENSBTAG00000031184, ENSBTAG00000001333, ENSBTAG00000003901, ENSBTAG00000002333	151	65	5145	2.09679	1	0.984362	99.142
GOTERM_BP_FAT	GO:0010605~negative regulation of macromolecule metabolic process	8	2.09974	0.302734	ENSBTAG00000031184, ENSBTAG00000001061, ENSBTAG00000001333, ENSBTAG00000019612, ENSBTAG00000003901, ENSBTAG00000002333, ENSBTAG00000003835, ENSBTAG00000002006	152	180	4989	1.45877	1	0.992688	99.7012
GOTERM_BP_FAT	GO:0031327~negative regulation of cellular biosynthetic process	6	1.5748	0.424741	ENSBTAG00000014541, ENSBTAG00000031184, ENSBTAG00000001333, ENSBTAG00000019612, ENSBTAG00000003901, ENSBTAG00000002333	152	141	4989	1.3967	1	0.999064	99.9865
GOTERM_BP_FAT	GO:0009890~negative regulation of biosynthetic process	6	1.5748	0.448807	ENSBTAG00000014541, ENSBTAG00000031184, ENSBTAG00000001333, ENSBTAG00000019612, ENSBTAG00000003901, ENSBTAG00000002333	152	145	4989	1.35817	1	0.999256	99.9932
GOTERM_BP_FAT	GO:0045892~negative regulation of transcription, DNA-dependent	4	1.04987	0.516507	ENSBTAG00000031184, ENSBTAG00000001333, ENSBTAG00000003901, ENSBTAG00000002333	152	90	4989	1.45877	1	0.999724	99.9992
GOTERM_MF_FAT	GO:0030528~transcription regulator activity	13	3.41207	0.517811	ENSBTAG00000031184, ENSBTAG00000001333, ENSBTAG00000011182, ENSBTAG00000003901, ENSBTAG00000002333, ENSBTAG00000020713, ENSBTAG00000032132, ENSBTAG00000007917, ENSBTAG00000002835, ENSBTAG00000017661, ENSBTAG00000008313, ENSBTAG00000026769, ENSBTAG00000008943	151	404	5145	1.0964	1	0.999261	99.9953
GOTERM_BP_FAT	GO:0051253~negative regulation of RNA metabolic process	4	1.04987	0.524008	ENSBTAG00000031184, ENSBTAG00000001333, ENSBTAG00000003901, ENSBTAG00000002333	152	91	4989	1.44274	1	0.99975	99.9994
GOTERM_BP_FAT	GO:0010629~negative regulation of gene expression	5	1.31234	0.571158	ENSBTAG00000031184, ENSBTAG00000001333, ENSBTAG00000003901, ENSBTAG00000002333, ENSBTAG00000003835	152	132	4989	1.24327	1	0.99989	99.9999
GOTERM_BP_FAT	GO:0010558~negative regulation of macromolecule biosynthetic process	5	1.31234	0.612455	ENSBTAG00000031184, ENSBTAG00000001333, ENSBTAG00000019612, ENSBTAG00000003901, ENSBTAG00000002333	152	139	4989	1.18066	1	0.999942	100
GOTERM_BP_FAT	GO:0016481~negative regulation of transcription	4	1.04987	0.6943	ENSBTAG00000031184, ENSBTAG00000001333, ENSBTAG00000003901, ENSBTAG00000002333	152	117	4989	1.12213	1	0.999994	100
GOTERM_BP_FAT	GO:0045934~negative regulation of nucleobase, nucleoside, nucleotide and nucleic acid metabolic process	4	1.04987	0.746314	ENSBTAG00000031184, ENSBTAG00000001333, ENSBTAG00000003901, ENSBTAG00000002333	152	127	4989	1.03378	1	0.999999	100
GOTERM_BP_FAT	GO:0051172~negative regulation of nitrogen compound metabolic process	4	1.04987	0.751109	ENSBTAG00000031184, ENSBTAG00000001333, ENSBTAG00000003901, ENSBTAG00000002333	152	128	4989	1.0257	1	0.999999	100
GOTERM_BP_FAT	GO:0006355~regulation of transcription, DNA-dependent	13	3.41207	0.765141	ENSBTAG00000031184, ENSBTAG00000001333, ENSBTAG00000003901, ENSBTAG00000002333, ENSBTAG00000005017, ENSBTAG00000020713, ENSBTAG00000032132, ENSBTAG00000007917, ENSBTAG00000002835, ENSBTAG00000017661, ENSBTAG00000008313, ENSBTAG00000008943, ENSBTAG00000003835	152	466	4989	0.915645	1	0.999999	100
GOTERM_BP_FAT	GO:0051252~regulation of RNA metabolic process	13	3.41207	0.794633	ENSBTAG00000031184, ENSBTAG00000001333, ENSBTAG00000003901, ENSBTAG00000002333, ENSBTAG00000005017, ENSBTAG00000020713, ENSBTAG00000032132, ENSBTAG00000007917, ENSBTAG00000002835, ENSBTAG00000017661, ENSBTAG00000008313, ENSBTAG00000008943, ENSBTAG00000003835	152	478	4989	0.892659	1	1	100
GOTERM_BP_FAT	GO:0045449~regulation of transcription	17	4.46194	0.92536	ENSBTAG00000031184, ENSBTAG00000001333, ENSBTAG00000011182, ENSBTAG00000003901, ENSBTAG00000002333, ENSBTAG00000005017, ENSBTAG00000020713, ENSBTAG00000032132, ENSBTAG00000007917, ENSBTAG00000001321, ENSBTAG00000002835, ENSBTAG00000017661, ENSBTAG00000008313, ENSBTAG00000015644, ENSBTAG00000026769, ENSBTAG00000008943, ENSBTAG00000003835	152	709	4989	0.786996	1	1	100
Annotation Cluster 21; Enrichment Score: 0.2
Category	Term	Count	%	PValue	Genes	List Total	Pop Hits	Pop Total	Fold Enrichment	Bonferroni	Benjamini	FDR
GOTERM_CC_FAT	GO:0016023~cytoplasmic membrane-bounded vesicle	6	1.5748	0.58043	ENSBTAG00000009836, ENSBTAG00000001321, ENSBTAG00000004247, ENSBTAG00000005574, ENSBTAG00000003506, ENSBTAG00000021176	130	151	3834	1.17188	1	0.998997	99.9972
GOTERM_CC_FAT	GO:0031988~membrane-bounded vesicle	6	1.5748	0.609861	ENSBTAG00000009836, ENSBTAG00000001321, ENSBTAG00000004247, ENSBTAG00000005574, ENSBTAG00000003506, ENSBTAG00000021176	130	156	3834	1.13432	1	0.999197	99.9988
GOTERM_CC_FAT	GO:0031410~cytoplasmic vesicle	6	1.5748	0.755355	ENSBTAG00000009836, ENSBTAG00000001321, ENSBTAG00000004247, ENSBTAG00000005574, ENSBTAG00000003506, ENSBTAG00000021176	130	185	3834	0.956507	1	0.999871	100
GOTERM_CC_FAT	GO:0031982~vesicle	6	1.5748	0.78371	ENSBTAG00000009836, ENSBTAG00000001321, ENSBTAG00000004247, ENSBTAG00000005574, ENSBTAG00000003506, ENSBTAG00000021176	130	192	3834	0.921635	1	0.999914	100
Annotation Cluster 22; Enrichment Score: 0.2
Category	Term	Count	%	PValue	Genes	List Total	Pop Hits	Pop Total	Fold Enrichment	Bonferroni	Benjamini	FDR
GOTERM_MF_FAT	GO:0004714~transmembrane receptor protein tyrosine kinase activity	4	1.04987	0.0102907	ENSBTAG00000005828, ENSBTAG00000007173, ENSBTAG00000018572, ENSBTAG00000006161	151	16	5145	8.51821	0.972098	0.360699	13.1712
GOTERM_MF_FAT	GO:0004713~protein tyrosine kinase activity	4	1.04987	0.246487	ENSBTAG00000005828, ENSBTAG00000007173, ENSBTAG00000018572, ENSBTAG00000006161	151	59	5145	2.31002	1	0.97686	97.9017
GOTERM_MF_FAT	GO:0003924~GTPase activity	4	1.04987	0.278232	ENSBTAG00000030973, ENSBTAG00000030974, ENSBTAG00000014529, ENSBTAG00000020520	151	63	5145	2.16336	1	0.982209	98.8341
GOTERM_MF_FAT	GO:0005525~GTP binding	6	1.5748	0.729081	ENSBTAG00000030973, ENSBTAG00000030974, ENSBTAG00000001497, ENSBTAG00000014529, ENSBTAG00000020520, ENSBTAG00000015727	151	207	5145	0.987619	1	0.999988	100
GOTERM_MF_FAT	GO:0032561~guanyl ribonucleotide binding	6	1.5748	0.736851	ENSBTAG00000030973, ENSBTAG00000030974, ENSBTAG00000001497, ENSBTAG00000014529, ENSBTAG00000020520, ENSBTAG00000015727	151	209	5145	0.978168	1	0.999987	100
GOTERM_MF_FAT	GO:0019001~guanyl nucleotide binding	6	1.5748	0.740676	ENSBTAG00000030973, ENSBTAG00000030974, ENSBTAG00000001497, ENSBTAG00000014529, ENSBTAG00000020520, ENSBTAG00000015727	151	210	5145	0.97351	1	0.999985	100
GOTERM_BP_FAT	GO:0006793~phosphorus metabolic process	12	3.14961	0.825346	ENSBTAG00000040559, ENSBTAG00000001321, ENSBTAG00000005828, ENSBTAG00000003033, ENSBTAG00000001061, ENSBTAG00000007173, ENSBTAG00000018572, ENSBTAG00000015311, ENSBTAG00000015296, ENSBTAG00000020350, ENSBTAG00000006161, ENSBTAG00000002006	152	455	4989	0.865645	1	1	100
GOTERM_BP_FAT	GO:0006796~phosphate metabolic process	12	3.14961	0.825346	ENSBTAG00000040559, ENSBTAG00000001321, ENSBTAG00000005828, ENSBTAG00000003033, ENSBTAG00000001061, ENSBTAG00000007173, ENSBTAG00000018572, ENSBTAG00000015311, ENSBTAG00000015296, ENSBTAG00000020350, ENSBTAG00000006161, ENSBTAG00000002006	152	455	4989	0.865645	1	1	100
GOTERM_BP_FAT	GO:0006468~protein amino acid phosphorylation	8	2.09974	0.836117	ENSBTAG00000001321, ENSBTAG00000005828, ENSBTAG00000003033, ENSBTAG00000001061, ENSBTAG00000007173, ENSBTAG00000018572, ENSBTAG00000006161, ENSBTAG00000002006	152	309	4989	0.84977	1	1	100
SP_PIR_KEYWORDS	gtp-binding	4	1.04987	0.842307	ENSBTAG00000030973, ENSBTAG00000030974, ENSBTAG00000001497, ENSBTAG00000020520	150	155	5056	0.869849	1	0.999999	100
GOTERM_BP_FAT	GO:0016310~phosphorylation	8	2.09974	0.939267	ENSBTAG00000001321, ENSBTAG00000005828, ENSBTAG00000003033, ENSBTAG00000001061, ENSBTAG00000007173, ENSBTAG00000018572, ENSBTAG00000006161, ENSBTAG00000002006	152	370	4989	0.709673	1	1	100
SP_PIR_KEYWORDS	transferase	9	2.3622	0.956284	ENSBTAG00000016208, ENSBTAG00000011278, ENSBTAG00000000795, ENSBTAG00000025161, ENSBTAG00000001061, ENSBTAG00000001154, ENSBTAG00000016032, ENSBTAG00000003901, ENSBTAG00000006161	150	442	5056	0.686335	1	1	100
GOTERM_MF_FAT	GO:0004672~protein kinase activity	5	1.31234	0.973205	ENSBTAG00000005828, ENSBTAG00000001061, ENSBTAG00000007173, ENSBTAG00000018572, ENSBTAG00000006161	151	289	5145	0.589496	1	1	100
GOTERM_MF_FAT	GO:0017076~purine nucleotide binding	21	5.51181	0.976501	ENSBTAG00000013078, ENSBTAG00000005828, ENSBTAG00000030973, ENSBTAG00000000795, ENSBTAG00000030974, ENSBTAG00000001061, ENSBTAG00000039206, ENSBTAG00000006921, ENSBTAG00000016761, ENSBTAG00000014529, ENSBTAG00000000945, ENSBTAG00000006161, ENSBTAG00000015727, ENSBTAG00000003763, ENSBTAG00000011278, ENSBTAG00000019321, ENSBTAG00000001497, ENSBTAG00000007173, ENSBTAG00000018572, ENSBTAG00000003506,…	151	981	5145	0.729388	1	1	100
GOTERM_MF_FAT	GO:0030554~adenyl nucleotide binding	15	3.93701	0.987952	ENSBTAG00000013078, ENSBTAG00000005828, ENSBTAG00000000795, ENSBTAG00000001061, ENSBTAG00000039206, ENSBTAG00000006921, ENSBTAG00000016761, ENSBTAG00000000945, ENSBTAG00000006161, ENSBTAG00000003763, ENSBTAG00000011278, ENSBTAG00000019321, ENSBTAG00000007173, ENSBTAG00000018572, ENSBTAG00000003506	151	781	5145	0.654408	1	1	100
GOTERM_MF_FAT	GO:0001883~purine nucleoside binding	15	3.93701	0.988903	ENSBTAG00000013078, ENSBTAG00000005828, ENSBTAG00000000795, ENSBTAG00000001061, ENSBTAG00000039206, ENSBTAG00000006921, ENSBTAG00000016761, ENSBTAG00000000945, ENSBTAG00000006161, ENSBTAG00000003763, ENSBTAG00000011278, ENSBTAG00000019321, ENSBTAG00000007173, ENSBTAG00000018572, ENSBTAG00000003506	151	786	5145	0.650245	1	1	100
GOTERM_MF_FAT	GO:0001882~nucleoside binding	15	3.93701	0.989786	ENSBTAG00000013078, ENSBTAG00000005828, ENSBTAG00000000795, ENSBTAG00000001061, ENSBTAG00000039206, ENSBTAG00000006921, ENSBTAG00000016761, ENSBTAG00000000945, ENSBTAG00000006161, ENSBTAG00000003763, ENSBTAG00000011278, ENSBTAG00000019321, ENSBTAG00000007173, ENSBTAG00000018572, ENSBTAG00000003506	151	791	5145	0.646135	1	1	100
GOTERM_MF_FAT	GO:0032553~ribonucleotide binding	18	4.72441	0.992806	ENSBTAG00000013078, ENSBTAG00000005828, ENSBTAG00000030973, ENSBTAG00000000795, ENSBTAG00000030974, ENSBTAG00000001061, ENSBTAG00000039206, ENSBTAG00000006921, ENSBTAG00000014529, ENSBTAG00000000945, ENSBTAG00000006161, ENSBTAG00000015727, ENSBTAG00000003763, ENSBTAG00000011278, ENSBTAG00000001497, ENSBTAG00000007173, ENSBTAG00000018572, ENSBTAG00000020520	151	938	5145	0.65385	1	1	100
GOTERM_MF_FAT	GO:0032555~purine ribonucleotide binding	18	4.72441	0.992806	ENSBTAG00000013078, ENSBTAG00000005828, ENSBTAG00000030973, ENSBTAG00000000795, ENSBTAG00000030974, ENSBTAG00000001061, ENSBTAG00000039206, ENSBTAG00000006921, ENSBTAG00000014529, ENSBTAG00000000945, ENSBTAG00000006161, ENSBTAG00000015727, ENSBTAG00000003763, ENSBTAG00000011278, ENSBTAG00000001497, ENSBTAG00000007173, ENSBTAG00000018572, ENSBTAG00000020520	151	938	5145	0.65385	1	1	100
GOTERM_MF_FAT	GO:0000166~nucleotide binding	23	6.03675	0.994508	ENSBTAG00000011037, ENSBTAG00000013078, ENSBTAG00000033727, ENSBTAG00000005828, ENSBTAG00000030973, ENSBTAG00000000795, ENSBTAG00000030974, ENSBTAG00000001061, ENSBTAG00000039206, ENSBTAG00000006921, ENSBTAG00000016761, ENSBTAG00000014529, ENSBTAG00000000945, ENSBTAG00000006161, ENSBTAG00000015727, ENSBTAG00000003763, ENSBTAG00000011278, ENSBTAG00000019321, ENSBTAG00000001497, ENSBTAG00000007173,…	151	1159	5145	0.676165	1	1	100
GOTERM_MF_FAT	GO:0005524~ATP binding	12	3.14961	0.997229	ENSBTAG00000003763, ENSBTAG00000013078, ENSBTAG00000011278, ENSBTAG00000005828, ENSBTAG00000000795, ENSBTAG00000001061, ENSBTAG00000039206, ENSBTAG00000006921, ENSBTAG00000007173, ENSBTAG00000018572, ENSBTAG00000000945, ENSBTAG00000006161	151	732	5145	0.558571	1	1	100
GOTERM_MF_FAT	GO:0032559~adenyl ribonucleotide binding	12	3.14961	0.997583	ENSBTAG00000003763, ENSBTAG00000013078, ENSBTAG00000011278, ENSBTAG00000005828, ENSBTAG00000000795, ENSBTAG00000001061, ENSBTAG00000039206, ENSBTAG00000006921, ENSBTAG00000007173, ENSBTAG00000018572, ENSBTAG00000000945, ENSBTAG00000006161	151	739	5145	0.55328	1	1	100
SP_PIR_KEYWORDS	nucleotide-binding	9	2.3622	0.998399	ENSBTAG00000013078, ENSBTAG00000011278, ENSBTAG00000030973, ENSBTAG00000000795, ENSBTAG00000030974, ENSBTAG00000001497, ENSBTAG00000001061, ENSBTAG00000020520, ENSBTAG00000006161	150	611	5056	0.496498	1	1	100
SP_PIR_KEYWORDS	atp-binding	5	1.31234	0.999492	ENSBTAG00000013078, ENSBTAG00000011278, ENSBTAG00000000795, ENSBTAG00000001061, ENSBTAG00000006161	150	450	5056	0.374519	1	1	100
Annotation Cluster 23; Enrichment Score: 0.2
Category	Term	Count	%	PValue	Genes	List Total	Pop Hits	Pop Total	Fold Enrichment	Bonferroni	Benjamini	FDR
GOTERM_BP_FAT	GO:0043623~cellular protein complex assembly	4	1.04987	0.305839	ENSBTAG00000002835, ENSBTAG00000030973, ENSBTAG00000030974, ENSBTAG00000019612	152	64	4989	2.0514	1	0.992715	99.7219
GOTERM_BP_FAT	GO:0034622~cellular macromolecular complex assembly	4	1.04987	0.677228	ENSBTAG00000002835, ENSBTAG00000030973, ENSBTAG00000030974, ENSBTAG00000019612	152	114	4989	1.15166	1	0.99999	100
GOTERM_BP_FAT	GO:0034621~cellular macromolecular complex subunit organization	4	1.04987	0.73149	ENSBTAG00000002835, ENSBTAG00000030973, ENSBTAG00000030974, ENSBTAG00000019612	152	124	4989	1.05879	1	0.999998	100
GOTERM_BP_FAT	GO:0070271~protein complex biogenesis	4	1.04987	0.782683	ENSBTAG00000002835, ENSBTAG00000030973, ENSBTAG00000030974, ENSBTAG00000019612	152	135	4989	0.972515	1	1	100
GOTERM_BP_FAT	GO:0006461~protein complex assembly	4	1.04987	0.782683	ENSBTAG00000002835, ENSBTAG00000030973, ENSBTAG00000030974, ENSBTAG00000019612	152	135	4989	0.972515	1	1	100
GOTERM_BP_FAT	GO:0043933~macromolecular complex subunit organization	5	1.31234	0.86024	ENSBTAG00000012855, ENSBTAG00000002835, ENSBTAG00000030973, ENSBTAG00000030974, ENSBTAG00000019612	152	199	4989	0.824683	1	1	100
GOTERM_BP_FAT	GO:0065003~macromolecular complex assembly	4	1.04987	0.927877	ENSBTAG00000002835, ENSBTAG00000030973, ENSBTAG00000030974, ENSBTAG00000019612	152	187	4989	0.702083	1	1	100
Annotation Cluster 24; Enrichment Score: 0.004
Category	Term	Count	%	PValue	Genes	List Total	Pop Hits	Pop Total	Fold Enrichment	Bonferroni	Benjamini	FDR
GOTERM_CC_FAT	GO:0019866~organelle inner membrane	4	1.04987	0.973677	ENSBTAG00000039555, ENSBTAG00000017574, ENSBTAG00000018808, ENSBTAG00000019521	130	206	3834	0.572666	1	1	100
GOTERM_CC_FAT	GO:0031967~organelle envelope	5	1.31234	0.995586	ENSBTAG00000039555, ENSBTAG00000009737, ENSBTAG00000017574, ENSBTAG00000018808, ENSBTAG00000019521	130	317	3834	0.465178	1	1	100
GOTERM_CC_FAT	GO:0031975~envelope	5	1.31234	0.995586	ENSBTAG00000039555, ENSBTAG00000009737, ENSBTAG00000017574, ENSBTAG00000018808, ENSBTAG00000019521	130	317	3834	0.465178	1	1	100
GOTERM_CC_FAT	GO:0031090~organelle membrane	7	1.83727	0.998559	ENSBTAG00000039555, ENSBTAG00000006349, ENSBTAG00000017574, ENSBTAG00000018808, ENSBTAG00000019521, ENSBTAG00000003506, ENSBTAG00000007654	130	449	3834	0.459791	1	1	100
Annotation Cluster 25; Enrichment Score: 0.00008
Category	Term	Count	%	PValue	Genes	List Total	Pop Hits	Pop Total	Fold Enrichment	Bonferroni	Benjamini	FDR
GOTERM_CC_FAT	GO:0031981~nuclear lumen	5	1.31234	0.999287	ENSBTAG00000032132, ENSBTAG00000002835, ENSBTAG00000017574, ENSBTAG00000011182, ENSBTAG00000019612	130	380	3834	0.388057	1	1	100
GOTERM_CC_FAT	GO:0043233~organelle lumen	5	1.31234	0.999991	ENSBTAG00000032132, ENSBTAG00000002835, ENSBTAG00000017574, ENSBTAG00000011182, ENSBTAG00000019612	130	517	3834	0.285225	1	1	100
GOTERM_CC_FAT	GO:0070013~intracellular organelle lumen	5	1.31234	0.999991	ENSBTAG00000032132, ENSBTAG00000002835, ENSBTAG00000017574, ENSBTAG00000011182, ENSBTAG00000019612	130	517	3834	0.285225	1	1	100
GOTERM_CC_FAT	GO:0031974~membrane-enclosed lumen	5	1.31234	0.999995	ENSBTAG00000032132, ENSBTAG00000002835, ENSBTAG00000017574, ENSBTAG00000011182, ENSBTAG00000019612	130	535	3834	0.275629	1	1	100
