# Supplementary material for: Characterisation of the Whole Blood mRNA Transcriptome in Holstein-Friesian and Jersey Calves in Response to Gradual Weaning
Source: PLoS One. 2016 Aug 1;11(8):e0159707. doi: 10.1371/journal.pone.0159707 (PMC4968839; doi:10.1371/journal.pone.0159707)
Supplement: S8 Table — Enriched gene functional classification groups (group enrichment score > 1.3) are highlighted in yellow. (XLSX) [file pone.0159707.s008.xlsx]

## Sheet: Supplementary Table 5.13
S8 Table. Gene functional classification groups identified among the DEG between Holstein-Friesian and Jersey calves at day -14, relative to weaning
Gene Group 1; Enrichment Score: 5.5
ENSEMBL_GENE_ID	Gene Name
ENSBTAG00000005891	Fc receptor-like 1
ENSBTAG00000007275	triggering receptor expressed on myeloid cells 2
ENSBTAG00000024947	testicular cell adhesion molecule 1 homolog (mouse)
ENSBTAG00000000603	junctional adhesion molecule 2
ENSBTAG00000039520	signal-regulatory protein beta 1
ENSBTAG00000038288	killer cell immunoglobulin-like receptor, two domains, short cytoplasmic tail, 1
ENSBTAG00000006343	interleukin 1 receptor, type II
ENSBTAG00000004043	Fc gamma 2 receptor
Gene Group 2; Enrichment Score: 3.6
ENSEMBL_GENE_ID	Gene Name
ENSBTAG00000011961	platelet factor 4
ENSBTAG00000025250	chemokine (C-C motif) ligand 3
ENSBTAG00000031998	chemokine (C-X-C motif) ligand 16
ENSBTAG00000001725	chemokine (C-X-C motif) ligand 10
ENSBTAG00000007191	chemokine (C-C motif) ligand 5
Gene Group 3; Enrichment Score: 3.6
ENSEMBL_GENE_ID	Gene Name
ENSBTAG00000008483	calcitonin receptor-like
ENSBTAG00000004547	oxidized low density lipoprotein (lectin-like) receptor 1
ENSBTAG00000007650	solute carrier family 38, member 11
ENSBTAG00000000898	coagulation factor II (thrombin) receptor-like 2
ENSBTAG00000010238	leukotriene B4 receptor
ENSBTAG00000018432	solute carrier family 6 (neutral amino acid transporter), member 15
ENSBTAG00000040128	frizzled homolog 4 (Drosophila)
ENSBTAG00000019741	complement component 3a receptor 1
ENSBTAG00000020990	purinergic receptor P2Y, G-protein coupled, 14
ENSBTAG00000013791	free fatty acid receptor 3
ENSBTAG00000030424	C-type lectin domain family 1, member A
ENSBTAG00000002096	Fc fragment of IgG, low affinity IIIa, receptor (CD16a)
ENSBTAG00000014861	solute carrier family 20 (phosphate transporter), member 2
ENSBTAG00000039292	adrenergic, alpha-2A-, receptor
ENSBTAG00000000616	G protein-coupled receptor 161
Gene Group 4; Enrichment Score: 3.3
ENSEMBL_GENE_ID	Gene Name
ENSBTAG00000012208	MHC class I heavy chain
ENSBTAG00000015565	similar to MHC class II antigen
ENSBTAG00000002069	MHC class I heavy chain
ENSBTAG00000038263	CD1a molecule; hypothetical protein LOC781011; similar to CD1A antigen
ENSBTAG00000020116	MHC Class I JSP.1
ENSBTAG00000019386	non-classical MHC class I antigen
Gene Group 5; Enrichment Score: 2.7
ENSEMBL_GENE_ID	Gene Name
ENSBTAG00000014497	G protein-coupled receptor 31
ENSBTAG00000013791	free fatty acid receptor 3
ENSBTAG00000007996	similar to 5-hydroxytryptamine receptor 6 (5-HT-6) (Serotonin receptor 6); 5-hydroxytryptamine (serotonin) receptor 6
ENSBTAG00000003528	similar to EGF-like module-containing mucin-like hormone receptor-like 2 precursor (EGF-like module EMR2) (CD312 antigen)
ENSBTAG00000004076	similar to G-protein coupled receptor TG1019
Gene Group 6; Enrichment Score: 2.5
ENSEMBL_GENE_ID	Gene Name
ENSBTAG00000002348	solute carrier family 4, sodium bicarbonate cotransporter, member 4
ENSBTAG00000018432	solute carrier family 6 (neutral amino acid transporter), member 15
ENSBTAG00000013861	solute carrier family 8 (sodium/calcium exchanger), member 1
ENSBTAG00000007650	solute carrier family 38, member 11
ENSBTAG00000003826	sodium channel, voltage-gated, type I, beta
ENSBTAG00000008294	potassium inwardly-rectifying channel, subfamily J, member 2
ENSBTAG00000014861	solute carrier family 20 (phosphate transporter), member 2
Gene Group 7; Enrichment Score: 2.0
ENSEMBL_GENE_ID	Gene Name
ENSBTAG00000020203	transmembrane protein 151A
ENSBTAG00000033748	interleukin 18 receptor accessory protein
ENSBTAG00000011582	serine incorporator 2
ENSBTAG00000003155	family with sequence similarity 14, member A
ENSBTAG00000007312	CD209 molecule
ENSBTAG00000002786	similar to Myeloid-associated differentiation marker
ENSBTAG00000016429	transmembrane protein 205
Gene Group 8; Enrichment Score: 1.9
ENSEMBL_GENE_ID	Gene Name
ENSBTAG00000010532	potassium channel tetramerisation domain containing 11
ENSBTAG00000011873	potassium voltage-gated channel, Isk-related family, member 3
ENSBTAG00000003826	sodium channel, voltage-gated, type I, beta
ENSBTAG00000019355	potassium channel, subfamily K, member 10
ENSBTAG00000008294	potassium inwardly-rectifying channel, subfamily J, member 2
ENSBTAG00000008626	potassium intermediate/small conductance calcium-activated channel, subfamily N, member 1
Gene Group 9; Enrichment Score: 0.8
ENSEMBL_GENE_ID	Gene Name
ENSBTAG00000002100	granzyme M (lymphocyte met-ase 1)
ENSBTAG00000021958	granzyme A (granzyme 1, cytotoxic T-lymphocyte-associated serine esterase 3)
ENSBTAG00000016204	complement component 1, r subcomponent-like
ENSBTAG00000008389	HtrA serine peptidase 1
Gene Group 10; Enrichment Score: 0.4
ENSEMBL_GENE_ID	Gene Name
ENSBTAG00000008943	zinc finger and SCAN domain containing 12
ENSBTAG00000008313	Kruppel-like factor 15
ENSBTAG00000008182	FBJ murine osteosarcoma viral oncogene homolog B
ENSBTAG00000007917	teashirt zinc finger homeobox 2
ENSBTAG00000005017	zinc finger protein 169
ENSBTAG00000002129	Kruppel-like factor 5 (intestinal)
ENSBTAG00000043953	Spi-B transcription factor (Spi-1/PU.1 related)
ENSBTAG00000017661	regulatory factor X, 2 (influences HLA class II expression)
ENSBTAG00000040585	nuclear receptor subfamily 6, group A, member 1
ENSBTAG00000020713	BTB and CNC homology 1, basic leucine zipper transcription factor 2
Gene Group 11; Enrichment Score: 0.4
ENSEMBL_GENE_ID	Gene Name
ENSBTAG00000008943	zinc finger and SCAN domain containing 12
ENSBTAG00000011545	guanine deaminase
ENSBTAG00000038916	prickle homolog 4 (Drosophila)
ENSBTAG00000020890	similar to Tripartite motif-containing protein 66 (Transcriptional intermediary factor 1 delta)
ENSBTAG00000016137	zinc finger protein 608
ENSBTAG00000013496	carboxypeptidase M
ENSBTAG00000007917	teashirt zinc finger homeobox 2
ENSBTAG00000011616	myeloperoxidase
ENSBTAG00000039206	schlafen family member 14
ENSBTAG00000019321	dihydrouridine synthase 1-like (S. cerevisiae); similar to Coiled-coil domain containing 57
ENSBTAG00000008732	zinc finger CCCH-type containing 12C
ENSBTAG00000005017	zinc finger protein 169
ENSBTAG00000016761	NADPH oxidase 1
ENSBTAG00000037800	apolipoprotein B mRNA editing enzyme, catalytic polypeptide-like 3A
ENSBTAG00000040585	nuclear receptor subfamily 6, group A, member 1
ENSBTAG00000007111	STEAP family member 3
Gene Group 12; Enrichment Score: 0.3
ENSEMBL_GENE_ID	Gene Name
ENSBTAG00000024492	similar to protein tyrosine phosphatase, non-receptor type 11
ENSBTAG00000015311	protein tyrosine phosphatase, receptor type, R
ENSBTAG00000015296	protein tyrosine phosphatase, receptor type, B
ENSBTAG00000040559	protein tyrosine phosphatase, receptor type, H
Gene Group 13; Enrichment Score: 0.0009
ENSEMBL_GENE_ID	Gene Name
ENSBTAG00000015527	myosin ID
ENSBTAG00000003763	myosin VC
ENSBTAG00000014628	2'-5'-oligoadenylate synthetase 2, 69/71kDa; 2',5'-oligoadenylate synthetase 1, 40/46kDa
ENSBTAG00000039206	schlafen family member 14
ENSBTAG00000004885	discoidin domain receptor tyrosine kinase 2
ENSBTAG00000006921	ATP-binding cassette, sub-family A (ABC1), member 6
ENSBTAG00000011278	xylulokinase homolog (H. influenzae)
ENSBTAG00000005092	receptor tyrosine kinase-like orphan receptor 2
ENSBTAG00000037527	2',5'-oligoadenylate synthetase 1, 40/46kDa
ENSBTAG00000039861	2',5'-oligoadenylate synthetase 1, 40/46kDa
ENSBTAG00000003196	3'-phosphoadenosine 5'-phosphosulfate synthase 2
