# Supplementary material for: Characterisation of the Whole Blood mRNA Transcriptome in Holstein-Friesian and Jersey Calves in Response to Gradual Weaning
Source: PLoS One. 2016 Aug 1;11(8):e0159707. doi: 10.1371/journal.pone.0159707 (PMC4968839; doi:10.1371/journal.pone.0159707)
Supplement: S9 Table — Enriched gene functional classification groups (group enrichment score > 1.3) are highlighted in yellow. (XLSX) [file pone.0159707.s009.xlsx]

## Sheet: Supplementary Table 5.14
S9 Table. Gene functional classification groups identified among the DEG between Holstein-Friesian and Jersey calves at day 1, relative to weaning
Gene Group 1; Enrichment Score: 5.0
ENSEMBL_GENE_ID	Gene Name
ENSBTAG00000011961	platelet factor 4
ENSBTAG00000001725	chemokine (C-X-C motif) ligand 10
ENSBTAG00000025250	chemokine (C-C motif) ligand 3
ENSBTAG00000010155	regakine 1
ENSBTAG00000009812	chemokine (C-X-C motif) ligand 5
ENSBTAG00000007191	chemokine (C-C motif) ligand 5
Gene Group 2; Enrichment Score: 4.3
ENSEMBL_GENE_ID	Gene Name
ENSBTAG00000007275	triggering receptor expressed on myeloid cells 2
ENSBTAG00000024947	testicular cell adhesion molecule 1 homolog (mouse)
ENSBTAG00000000603	junctional adhesion molecule 2
ENSBTAG00000004043	Fc gamma 2 receptor
Gene Group 3; Enrichment Score: 3.5
ENSEMBL_GENE_ID	Gene Name
ENSBTAG00000012208	MHC class I heavy chain
ENSBTAG00000015565	similar to MHC class II antigen
ENSBTAG00000002069	MHC class I heavy chain
ENSBTAG00000020116	MHC Class I JSP.1
ENSBTAG00000019386	non-classical MHC class I antigen
Gene Group 4; Enrichment Score: 3.5
ENSEMBL_GENE_ID	Gene Name
ENSBTAG00000030424	C-type lectin domain family 1, member A
ENSBTAG00000020872	complement component 5a receptor 1
ENSBTAG00000015837	purinergic receptor P2Y, G-protein coupled, 12
ENSBTAG00000007996	similar to 5-hydroxytryptamine receptor 6 (5-HT-6) (Serotonin receptor 6); 5-hydroxytryptamine (serotonin) receptor 6
ENSBTAG00000004547	oxidized low density lipoprotein (lectin-like) receptor 1
ENSBTAG00000004869	coxsackie virus and adenovirus receptor
ENSBTAG00000017846	F11 receptor
ENSBTAG00000007421	cadherin 5, type 2 (vascular endothelium)
ENSBTAG00000018164	fibronectin type III domain containing 4
ENSBTAG00000008291	protein C receptor, endothelial (EPCR)
ENSBTAG00000013791	free fatty acid receptor 3
ENSBTAG00000019741	complement component 3a receptor 1
ENSBTAG00000019486	claudin 12
ENSBTAG00000000616	G protein-coupled receptor 161
ENSBTAG00000018432	solute carrier family 6 (neutral amino acid transporter), member 15
ENSBTAG00000020997	G protein-coupled receptor 15
ENSBTAG00000014497	G protein-coupled receptor 31
ENSBTAG00000010238	leukotriene B4 receptor
ENSBTAG00000008483	calcitonin receptor-like
ENSBTAG00000003528	similar to EGF-like module-containing mucin-like hormone receptor-like 2 precursor (EGF-like module EMR2) (CD312 antigen)
ENSBTAG00000038141	G protein-coupled receptor 56
ENSBTAG00000020990	purinergic receptor P2Y, G-protein coupled, 14
ENSBTAG00000014861	solute carrier family 20 (phosphate transporter), member 2
Gene Group 5; Enrichment Score: 2.8
ENSEMBL_GENE_ID	Gene Name
ENSBTAG00000013366	nuclear receptor interacting protein 3
ENSBTAG00000039813	granzyme B (granzyme 2, cytotoxic T-lymphocyte-associated serine esterase 1); similar to duodenase
ENSBTAG00000021565	protease, serine, 2 (trypsin 2)
ENSBTAG00000007450	complement factor B
ENSBTAG00000002100	granzyme M (lymphocyte met-ase 1)
ENSBTAG00000021958	granzyme A (granzyme 1, cytotoxic T-lymphocyte-associated serine esterase 3)
ENSBTAG00000019712	suppression of tumorigenicity 14 (colon carcinoma)
ENSBTAG00000021616	similar to protease, serine-like 1
Gene Group 6; Enrichment Score: 2.4
ENSEMBL_GENE_ID	Gene Name
ENSBTAG00000011582	serine incorporator 2
ENSBTAG00000007312	CD209 molecule
ENSBTAG00000021517	transmembrane protein 216
ENSBTAG00000018156	keratinocyte associated protein 3
ENSBTAG00000033748	interleukin 18 receptor accessory protein
ENSBTAG00000010068	receptor accessory protein 2
ENSBTAG00000002786	similar to Myeloid-associated differentiation marker
ENSBTAG00000018164	fibronectin type III domain containing 4
ENSBTAG00000005033	hypothetical protein LOC785988
ENSBTAG00000020203	transmembrane protein 151A
ENSBTAG00000038141	G protein-coupled receptor 56
Gene Group 7; Enrichment Score: 1.2
ENSEMBL_GENE_ID	Gene Name
ENSBTAG00000010532	potassium channel tetramerisation domain containing 11
ENSBTAG00000008870	potassium voltage-gated channel, delayed-rectifier, subfamily S, member 1
ENSBTAG00000019355	potassium channel, subfamily K, member 10
ENSBTAG00000008626	potassium intermediate/small conductance calcium-activated channel, subfamily N, member 1
Gene Group 8; Enrichment Score: 0.1
ENSEMBL_GENE_ID	Gene Name
ENSBTAG00000007917	teashirt zinc finger homeobox 2
ENSBTAG00000008313	Kruppel-like factor 15
ENSBTAG00000016496	zinc finger protein 641
ENSBTAG00000008943	zinc finger and SCAN domain containing 12
ENSBTAG00000020713	BTB and CNC homology 1, basic leucine zipper transcription factor 2
ENSBTAG00000005017	zinc finger protein 169
ENSBTAG00000013496	carboxypeptidase M
ENSBTAG00000017661	regulatory factor X, 2 (influences HLA class II expression)
Gene Group 9; Enrichment Score: 0.0002
ENSEMBL_GENE_ID	Gene Name
ENSBTAG00000039206	schlafen family member 14
ENSBTAG00000003763	myosin VC
ENSBTAG00000006921	ATP-binding cassette, sub-family A (ABC1), member 6
ENSBTAG00000014529	similar to guanylate binding protein 4; guanylate binding protein 4
ENSBTAG00000013294	ual-specificity tyrosine-(Y)-phosphorylation regulated kinase 3
ENSBTAG00000031186	guanylate binding protein family, member 6
