# Supplementary material for: Characterisation of the Whole Blood mRNA Transcriptome in Holstein-Friesian and Jersey Calves in Response to Gradual Weaning
Source: PLoS One. 2016 Aug 1;11(8):e0159707. doi: 10.1371/journal.pone.0159707 (PMC4968839; doi:10.1371/journal.pone.0159707)
Supplement: S10 Table — Enriched gene functional classification groups (group enrichment score > 1.3) are highlighted in yellow. (XLSX) [file pone.0159707.s010.xlsx]

## Sheet: Supplementary Table 5.15
S10 Table. Gene functional classification groups identified among the DEG between Holstein-Friesian and Jersey calves at day 8, relative to weaning
Gene Group 1; Enrichment Score: 5.2
ENSEMBL_GENE_ID	Gene Name
ENSBTAG00000007996	similar to 5-hydroxytryptamine receptor 6 (5-HT-6) (Serotonin receptor 6); 5-hydroxytryptamine (serotonin) receptor 6
ENSBTAG00000038042	interleukin 8 receptor, beta
ENSBTAG00000037735	G protein-coupled receptor 77
ENSBTAG00000003528	similar to EGF-like module-containing mucin-like hormone receptor-like 2 precursor (EGF-like module EMR2) (CD312 antigen)
ENSBTAG00000038981	similar to EMR4
ENSBTAG00000013791	free fatty acid receptor 3
ENSBTAG00000014497	G protein-coupled receptor 31
ENSBTAG00000004076	similar to G-protein coupled receptor TG1019
ENSBTAG00000003544	sphingosine-1-phosphate receptor 5
ENSBTAG00000038141	G protein-coupled receptor 56
ENSBTAG00000020872	complement component 5a receptor 1
Gene Group 2; Enrichment Score: 5.0
ENSEMBL_GENE_ID	Gene Name
ENSBTAG00000011961	platelet factor 4
ENSBTAG00000025250	chemokine (C-C motif) ligand 3
ENSBTAG00000010155	regakine 1
ENSBTAG00000009812	chemokine (C-X-C motif) ligand 5
ENSBTAG00000007191	chemokine (C-C motif) ligand 5
Gene Group 3; Enrichment Score: 3.8
ENSEMBL_GENE_ID	Gene Name
ENSBTAG00000008483	calcitonin receptor-like
ENSBTAG00000010238	leukotriene B4 receptor
ENSBTAG00000018432	solute carrier family 6 (neutral amino acid transporter), member 15
ENSBTAG00000027126	mucin 15, cell surface associated
ENSBTAG00000038042	interleukin 8 receptor, beta
ENSBTAG00000037735	G protein-coupled receptor 77
ENSBTAG00000020990	purinergic receptor P2Y, G-protein coupled, 14
ENSBTAG00000000585	lymphocyte antigen 6 complex, locus G6C
ENSBTAG00000013791	free fatty acid receptor 3
ENSBTAG00000017846	F11 receptor
ENSBTAG00000030424	C-type lectin domain family 1, member A
ENSBTAG00000018164	fibronectin type III domain containing 4
ENSBTAG00000012228	sema domain, immunoglobulin domain (Ig), transmembrane domain (TM) and short cytoplasmic domain, (semaphorin) 4A
ENSBTAG00000000616	G protein-coupled receptor 161
ENSBTAG00000020872	complement component 5a receptor 1
Gene Group 4; Enrichment Score: 3.0
ENSEMBL_GENE_ID	Gene Name
ENSBTAG00000012208	MHC class I heavy chain
ENSBTAG00000015565	similar to MHC class II antigen
ENSBTAG00000002069	MHC class I heavy chain
ENSBTAG00000020116	MHC Class I JSP.1
ENSBTAG00000019386	non-classical MHC class I antigen
Gene Group 5; Enrichment Score: 2.5
ENSEMBL_GENE_ID	Gene Name
ENSBTAG00000011582	serine incorporator 2
ENSBTAG00000007312	CD209 molecule
ENSBTAG00000027126	mucin 15, cell surface associated
ENSBTAG00000002555	PDZK1 interacting protein 1
ENSBTAG00000021517	transmembrane protein 216
ENSBTAG00000033748	interleukin 18 receptor accessory protein
ENSBTAG00000010068	receptor accessory protein 2
ENSBTAG00000002786	similar to Myeloid-associated differentiation marker
ENSBTAG00000018164	fibronectin type III domain containing 4
ENSBTAG00000020203	transmembrane protein 151A
ENSBTAG00000038141	G protein-coupled receptor 56
Gene Group 6, Enrichment Score: 1.2
ENSEMBL_GENE_ID	Gene Name
ENSBTAG00000010532	potassium channel tetramerisation domain containing 11
ENSBTAG00000011873	potassium voltage-gated channel, Isk-related family, member 3
ENSBTAG00000003826	sodium channel, voltage-gated, type I, beta
ENSBTAG00000008294	potassium inwardly-rectifying channel, subfamily J, member 2
ENSBTAG00000019355	potassium channel, subfamily K, member 10
Gene Group 7; Enrichment Score: 0.7
ENSEMBL_GENE_ID	Gene Name
ENSBTAG00000013366	nuclear receptor interacting protein 3
ENSBTAG00000002100	granzyme M (lymphocyte met-ase 1)
ENSBTAG00000021958	granzyme A (granzyme 1, cytotoxic T-lymphocyte-associated serine esterase 3)
ENSBTAG00000021616	similar to protease, serine-like 1
Gene Group 8; Enrichment Score: 0.5
ENSEMBL_GENE_ID	Gene Name
ENSBTAG00000015311	protein tyrosine phosphatase, receptor type, R
ENSBTAG00000015296	protein tyrosine phosphatase, receptor type, B
ENSBTAG00000020350	dual specificity phosphatase 2
ENSBTAG00000040559	protein tyrosine phosphatase, receptor type, H
Gene Group 9; Enrichment Score: 0.2
ENSEMBL_GENE_ID	Gene Name
ENSBTAG00000008943	zinc finger and SCAN domain containing 12
ENSBTAG00000008313	Kruppel-like factor 15
ENSBTAG00000013496	carboxypeptidase M
ENSBTAG00000018513	four and a half LIM domains 1
ENSBTAG00000017970	zyxin
ENSBTAG00000007917	teashirt zinc finger homeobox 2
ENSBTAG00000005017	zinc finger protein 169
ENSBTAG00000044194	zinc finger, DHHC-type containing 2
ENSBTAG00000008248	similar to dystrophin Dp260-1; dystrophin
ENSBTAG00000005163	S100 calcium binding protein A1
ENSBTAG00000017661	regulatory factor X, 2 (influences HLA class II expression)
ENSBTAG00000006662	ADAMTS-like 5
ENSBTAG00000006683	zinc finger, FYVE domain containing 28
ENSBTAG00000020713	BTB and CNC homology 1, basic leucine zipper transcription factor 2
Gene Group 10, Enrichment Score: 0.06
ENSEMBL_GENE_ID	Gene Name
ENSBTAG00000001497	muscle RAS oncogene homolog
ENSBTAG00000039206	schlafen family member 14
ENSBTAG00000015727	interferon gamma inducible protein 47
ENSBTAG00000006921	ATP-binding cassette, sub-family A (ABC1), member 6
ENSBTAG00000014529	similar to guanylate binding protein 4; guanylate binding protein 4
ENSBTAG00000020520	RAS, dexamethasone-induced 1
Gene Group 11; Enrichment Score: 0.004
ENSEMBL_GENE_ID	Gene Name
ENSBTAG00000039206	schlafen family member 14
ENSBTAG00000018572	fms-related tyrosine kinase 3
ENSBTAG00000005828	c-mer proto-oncogene tyrosine kinase
ENSBTAG00000003763	myosin VC
ENSBTAG00000011278	xylulokinase homolog (H. influenzae)
ENSBTAG00000006921	ATP-binding cassette, sub-family A (ABC1), member 6
