# Supplementary material for: Characterisation of the Whole Blood mRNA Transcriptome in Holstein-Friesian and Jersey Calves in Response to Gradual Weaning
Source: PLoS One. 2016 Aug 1;11(8):e0159707. doi: 10.1371/journal.pone.0159707 (PMC4968839; doi:10.1371/journal.pone.0159707)
Supplement: S11 Table — Genes coloured in red have increased expression in Jersey relative to Holstein-Friesian calves. Genes coloured in green have decreased expression in Jersey relative to Holstein-Friesian calves. (XLSX) [file pone.0159707.s011.xlsx]

## Sheet: Supplementary Table 5.20
S11 Table. Predicted activation states (increased or decreased) of biological functions identified by Ingenuity Pathway Analysis as enriched among the DEG between Holstein-Friesian and Jersey calves at day -14, relative to weaning
Categories	Diseases or Functions Annotation	Benjamini-Hochberg corrected p-Value	z-score	Predicted Activation State	Molecules (red=increased in Jersey relative to Holstein-Friesian, green=decreased in Jersey relative to Holstein-Friesian)	# Molecules
Cell-To-Cell Signaling and Interaction	binding of cells	0.000925	-2.116	Decreased	A2M,AXL,BTLA,CALCRL,CCL5,CD248,CDH5,CLEC10A,CLGN,CXADR,CXCL10,ERBB2,GP5,GP9,IL13RA1,IL18RAP,IL1R2,IL27,ITGB5,LPL,LRP6,MPO,MSR1,NRP1,OLR1,PF4,PRSS2,PTX3,SDC4,TGM2,VWF	31
Cell-To-Cell Signaling and Interaction	response of myeloid cells	0.0564	-2.078	Decreased	CXCL10,FCN1,GNAQ,ISG15,LCN2,PF4,PTX3,RASA4,SIGLEC1,SIRPB1,TGM2,TREM2	12
Cell-To-Cell Signaling and Interaction, Cellular Function and Maintenance, Inflammatory Response	phagocytosis of cells	0.00611	-2.403	Decreased	AXL,CD22,CXCL10,FCN1,FZD5,ISG15,ITGB5,LCN2,MPO,MSR1,PF4,PTX3,RASA4,SIGLEC1,SIRPB1,TGM2,TREM2,VWF	18
Cell-To-Cell Signaling and Interaction, Hematological System Development and Function, Immune Cell Trafficking, Tissue Development	adhesion of immune cells	0.0273	-3.099	Decreased	A2M,AXL,CCL3L3,CCL5,CLEC10A,CLU,CXCL10,LTB4R,MITF,MPO,MSR1,NRP1,OLR1,PF4,PILRA,PTGS2,TERT,TGM2,TNFSF12,VWF	20
Cell-To-Cell Signaling and Interaction, Inflammatory Response	response of phagocytes	0.0461	-2.258	Decreased	CCL5,CXCL10,FCN1,GNAQ,ISG15,LCN2,PF4,PTX3,RASA4,SIGLEC1,SIRPB1,TGM2,TREM2	13
Cell-To-Cell Signaling and Interaction, Inflammatory Response	immune response of leukocytes	0.0135	-2.065	Decreased	AXL,C3AR1,CD274,CXCL10,FCN1,IL23R,ISG15,KLRB1,LCN2,MSR1,NCR1,PF4,PTX3,RASA4,RET,SIGLEC1,SIRPB1,TGM2,TREM2	19
Cell-To-Cell Signaling and Interaction, Tissue Development	adhesion of blood cells	0.018	-2.768	Decreased	A2M,AXL,CCL3L3,CCL5,CLEC10A,CLU,CXCL10,GP5,LTB4R,MITF,MPO,MSR1,NRP1,OLR1,PF4,PILRA,PTGS2,PTX3,TERT,TGM2,TNFSF12,VWF	22
Cellular Movement	chemotaxis	0.0364	-3.438	Decreased	ADORA3,AIF1,AQP9,AXL,BMP4,C3AR1,CCL3L3,CCL5,CDKN1A,CLU,CXADR,CXCL10,CXCL16,ERBB2,KAL1,LCN2,LTB4R,MMP28,NLRP12,NRP1,PDGFRA,PF4,PROX1,PTGS2,PTPRO,SCN1B,XCL1	27
Cellular Movement	chemotaxis of cells	0.039	-3.432	Decreased	ADORA3,AIF1,AQP9,AXL,BMP4,C3AR1,CCL3L3,CCL5,CDKN1A,CLU,CXADR,CXCL10,CXCL16,ERBB2,LCN2,LTB4R,MMP28,NLRP12,NRP1,PDGFRA,PF4,PROX1,PTGS2,PTPRO,SCN1B,XCL1	26
Cellular Movement	homing	0.039	-2.952	Decreased	ADORA3,AIF1,AQP9,AXL,BMP4,C3AR1,CCL3L3,CCL5,CDKN1A,CLU,CXADR,CXCL10,CXCL16,CXCR5,ERBB2,KAL1,LCN2,LTB4R,MMP28,NLRP12,NRP1,PDGFRA,PF4,PROX1,PTGS2,PTPRO,SCN1B,XCL1	28
Cellular Movement	homing of cells	0.0442	-2.943	Decreased	ADORA3,AIF1,AQP9,AXL,BMP4,C3AR1,CCL3L3,CCL5,CDKN1A,CLU,CXADR,CXCL10,CXCL16,CXCR5,ERBB2,LCN2,LTB4R,MMP28,NLRP12,NRP1,PDGFRA,PF4,PROX1,PTGS2,PTPRO,SCN1B,XCL1	27
Cellular Movement	cell movement of blood cells	0.000198	-2.941	Decreased	ADORA3,AIF1,AQP9,BACH2,BMP4,BTLA,C2,C3AR1,CCL3L3,CCL5,CD19,CD22,CD274,CDKN1A,CFB,CIITA,CLU,CXADR,CXCL10,CXCL16,CXCR5,DDR2,EGR2,ERBB2,FOS,IDO1,IL15RA,JAM2,LCN2,LTB4R,MMP28,MPO,MSR1,NLRP12,OLR1,PDGFRA,PF4,PLXND1,PROX1,PTGS2,PTPRO,PTX3,SCN9A,SIGLEC8,TGM2,TNFSF12,TNFSF13B,TNFSF9,TREM2,VWF,XCL1	51
Cellular Movement	homing of blood cells	0.0475	-2.381	Decreased	ADORA3,AIF1,AQP9,BMP4,C3AR1,CCL3L3,CCL5,CDKN1A,CXADR,CXCL10,CXCL16,CXCR5,ERBB2,LCN2,LTB4R,MMP28,NLRP12,PF4,PTPRO,XCL1	20
Cellular Movement	cell movement	4.96e-07	-2.084	Decreased	A2M,ADORA3,AIF1,Ang4,AQP9,ARHGAP5,ATF3,AXL,BACH2,BMP4,BTLA,C2,C3AR1,CADPS2,CALCRL,CCL3L3,CCL5,CD19,CD22,CD274,CDH5,CDKN1A,CFB,CHGA,CIITA,CLU,CNTN2,CREB3L1,CSPG4,CXADR,CXCL10,CXCL16,CXCR5,DDR2,DRAM1,E2F2,EBF1,EFHC1,EGR2,ERBB2,FAT1,FBLN2,FOS,FZD4,FZD7,GPLD1,GRB7,HTR6,HTRA1,IDO1,IL15RA,ITGB5,JAM2,JUP,KAL1,KLF5,LAMC2,LCN2,LMNA,LRP6,LRRC16A,LTB4R,LY6D,MGLL,MITF,MMP28,MOV10L1,MPO,MSR1,MTBP,MTUS1,NLRP12…	105
Cellular Movement, Hematological System Development and Function, Immune Cell Trafficking	cell movement of leukocytes	0.00084	-3.353	Decreased	ADORA3,AIF1,AQP9,BACH2,C2,C3AR1,CCL3L3,CCL5,CD22,CD274,CDKN1A,CFB,CIITA,CXADR,CXCL10,CXCL16,CXCR5,DDR2,EGR2,ERBB2,FOS,IDO1,IL15RA,JAM2,LCN2,LTB4R,MMP28,MPO,MSR1,NLRP12,PF4,PLXND1,PTGS2,PTPRO,PTX3,SCN9A,SIGLEC8,TGM2,TNFSF12,TNFSF13B,TNFSF9,TREM2,VWF,XCL1	44
Cellular Movement, Hematological System Development and Function, Immune Cell Trafficking	cell movement of antigen presenting cells	0.0442	-3.317	Decreased	ADORA3,C3AR1,CCL3L3,CCL5,CDKN1A,CXCL10,ERBB2,IL15RA,MMP28,MPO,NLRP12,PF4,PLXND1,PTGS2,PTX3,SCN9A,TNFSF12,TNFSF9,TREM2	19
Cellular Movement, Hematological System Development and Function, Immune Cell Trafficking	homing of leukocytes	0.0707	-2.683	Decreased	ADORA3,AIF1,AQP9,C3AR1,CCL3L3,CCL5,CDKN1A,CXADR,CXCL10,CXCL16,CXCR5,ERBB2,LCN2,LTB4R,MMP28,NLRP12,PF4,PTPRO,XCL1	19
Cellular Movement, Hematological System Development and Function, Immune Cell Trafficking	cell movement of myeloid cells	0.0104	-2.67	Decreased	AIF1,AQP9,C2,C3AR1,CCL3L3,CCL5,CDKN1A,CFB,CXADR,CXCL10,CXCR5,DDR2,ERBB2,IL15RA,LCN2,LTB4R,MMP28,MSR1,NLRP12,PF4,PLXND1,PTGS2,PTPRO,PTX3,SIGLEC8,TGM2,TNFSF12,TREM2,VWF,XCL1	30
Cellular Movement, Hematological System Development and Function, Immune Cell Trafficking, Inflammatory Response	cell movement of phagocytes	0.0123	-3.555	Decreased	ADORA3,AIF1,AQP9,C2,C3AR1,CCL3L3,CCL5,CDKN1A,CFB,CXADR,CXCL10,DDR2,ERBB2,IL15RA,LCN2,LTB4R,MMP28,MPO,NLRP12,PF4,PLXND1,PTGS2,PTPRO,PTX3,SCN9A,TNFSF12,TNFSF9,TREM2,VWF,XCL1	30
Cellular Movement, Hematological System Development and Function, Immune Cell Trafficking, Inflammatory Response	chemotaxis of leukocytes	0.0707	-3.005	Decreased	ADORA3,AIF1,AQP9,C3AR1,CCL3L3,CCL5,CDKN1A,CXADR,CXCL10,CXCL16,ERBB2,LCN2,LTB4R,MMP28,NLRP12,PF4,PTPRO,XCL1	18
Cellular Movement, Hematological System Development and Function, Immune Cell Trafficking, Inflammatory Response	chemotaxis of phagocytes	0.039	-2.823	Decreased	ADORA3,AIF1,AQP9,C3AR1,CCL3L3,CCL5,CDKN1A,CXADR,CXCL10,ERBB2,LCN2,LTB4R,MMP28,NLRP12,PF4,PTPRO,XCL1	17
Cellular Movement, Hematological System Development and Function, Immune Cell Trafficking, Inflammatory Response	chemotaxis of myeloid cells	0.0579	-2.682	Decreased	AIF1,AQP9,C3AR1,CCL3L3,CCL5,CDKN1A,CXADR,CXCL10,ERBB2,LCN2,LTB4R,MMP28,NLRP12,PF4,PTPRO,XCL1	16
Cellular Movement, Hematological System Development and Function, Immune Cell Trafficking, Inflammatory Response	chemotaxis of neutrophils	0.0438	-2.377	Decreased	AQP9,C3AR1,CCL3L3,CCL5,CXADR,CXCL10,LCN2,LTB4R,NLRP12,PF4,XCL1	11
Cellular Movement, Hematological System Development and Function, Immune Cell Trafficking, Inflammatory Response	cell movement of neutrophils	0.0212	-2.366	Decreased	AQP9,C2,C3AR1,CCL3L3,CCL5,CFB,CXADR,CXCL10,DDR2,ERBB2,LCN2,LTB4R,NLRP12,PF4,PTGS2,PTX3,VWF,XCL1	18
Cellular Movement, Immune Cell Trafficking	leukocyte migration	0.000349	-3.12	Decreased	ADORA3,AIF1,AQP9,BACH2,BTLA,C2,C3AR1,CCL3L3,CCL5,CD19,CD22,CD274,CDKN1A,CFB,CIITA,CLU,CXADR,CXCL10,CXCL16,CXCR5,DDR2,EGR2,ERBB2,FOS,IDO1,IL15RA,JAM2,LCN2,LTB4R,MMP28,MPO,MSR1,NLRP12,OLR1,PDGFRA,PF4,PLXND1,PROX1,PTGS2,PTPRO,PTX3,SCN9A,SIGLEC8,TGM2,TNFSF12,TNFSF13B,TNFSF9,TREM2,VWF,XCL1	50
Cellular Function and Maintenance	engulfment of cells	0.013	-2.541	Decreased	AXL,CCL5,CD22,CXCL10,ERBB2,FCN1,FZD5,HIP1,ISG15,ITGB5,LCN2,MPO,MSR1,PF4,PTX3,RASA4,SCARB2,SIGLEC1,SIRPB1,STON2,TGM2,TREM2,VWF	23
Cellular Function and Maintenance	engulfment of leukocytes	0.00199	-2.187	Decreased	AXL,CCL5,CXCL10,FCN1,ISG15,LCN2,MSR1,PF4,PTX3,RASA4,SIGLEC1,SIRPB1,TGM2,TREM2	14
Cell Death and Survival	apoptosis	0.00084	-2.806	Decreased	A2M,ADORA3,AGPAT2,AIF1,Ang4,ATF3,AXL,BACH2,BMP4,CALCRL,CCDC8,CCL3L3,CCL5,CD19,CD22,CD274,CD33,CD79B,CDH5,CDKN1A,CIITA,CLU,COL5A3,CSHL1,CSPG4,CXADR,CXCL10,DHX58,DNMT3B,DRAM1,E2F2,EBF1,EFHC1,EGR2,EHD3,ERBB2,EVA1C,FAH,FFAR3,FOS,FOSB,GNAQ,GPLD1,GSTZ1,GZMA,GZMM,HFE,HIP1,HLA-B,HPCA,HSPB2,HSPB8,HTRA1,IDO1,IL15RA,IL23R,IL27,ISG15,ITGB5,JUP,KIFC3,KLF5,LCN2,LMNA,LRP6,MITF,MPL,MPO,MS4A1,MSR1,NOTCH3,NOX1,NRP…	113
Cell Death and Survival	cell death	0.000136	-2.418	Decreased	A2M,ADORA3,AGPAT2,AIF1,Ang4,AQP9,ATF3,AXL,BACH2,BMP4,BTLA,CADPS2,CALCRL,CCDC8,CCL3L3,CCL5,CD19,CD22,CD274,CD33,CD79B,CDH5,CDKN1A,CFB,CHGA,CIITA,CLEC10A,CLU,COL5A3,CREB3L1,CSHL1,CSPG4,CXADR,CXCL10,DHX58,DNMT3B,DRAM1,DYSF,E2F2,EBF1,EFHC1,EGR2,EHD3,EPHX2,ERBB2,EVA1C,FAH,FBXO2,FFAR3,FOS,FOSB,GDA,GNAQ,GPLD1,GRB7,GSTZ1,GZMA,GZMM,HFE,HIP1,HLA-B,HPCA,HSPB2,HSPB8,HTRA1,IDO1,IL15RA,IL23R,IL27,INIP,ISG15,IT…	142
Cell Death and Survival	necrosis	0.000709	-2.258	Decreased	A2M,ADORA3,AGPAT2,Ang4,ATF3,AXL,BACH2,BMP4,BTLA,CADPS2,CALCRL,CCDC8,CCL3L3,CCL5,CD19,CD22,CD274,CD33,CD79B,CDH5,CDKN1A,CIITA,CLEC10A,CLU,COL5A3,CREB3L1,CSHL1,CSPG4,CXADR,CXCL10,DHX58,DNMT3B,DRAM1,DYSF,E2F2,EBF1,EGR2,EPHX2,ERBB2,EVA1C,FAH,FOS,FOSB,GDA,GNAQ,GSTZ1,GZMA,GZMM,HFE,HIP1,HLA-B,HPCA,HSPB2,HSPB8,HTRA1,IDO1,IL15RA,IL27,INIP,ISG15,JUP,KIFC3,KLF5,LCN2,LMNA,LRP6,MITF,MPL,MPO,MS4A1,MSR1,NOTCH3,…	112
Cell Death and Survival	apoptosis of tumor cell lines	0.0707	-2.041	Decreased	AGPAT2,ATF3,BACH2,BMP4,CCDC8,CD274,CD79B,CDKN1A,CLU,CSPG4,E2F2,EBF1,EGR2,ERBB2,EVA1C,FOS,FOSB,GZMM,HPCA,HSPB2,HSPB8,HTRA1,IDO1,IL15RA,JUP,KIFC3,KLF5,LCN2,MITF,MS4A1,MSR1,NOTCH3,NRP1,NUMBL,PPP1R1B,PRDM5,PTGS2,PTPRO,RASD1,RET,RNASE1,SCIN,SMPD3,TERT,TGM1,TGM2,TNFSF12,TNFSF13B,TNFSF9	49
Protein Synthesis	quantity of protein in blood	0.0489	2.259	Increased	AGPAT2,AXL,C3AR1,CD19,CFB,CLEC10A,COL5A3,CSPG4,CXCL16,DHX58,DYSF,FABP2,FAH,FAM20C,FFAR3,HSPB8,IL13RA1,LMNA,LPL,OLR1,PHYH,PILRA,PTGS2,SIGLEC1,SMPD3,TGM2	26
Cellular Development	differentiation of cells	0.00695	-2.426	Decreased	A2M,ADORA3,ATF3,AXL,BACH2,BMP4,C3AR1,CADPS2,CALD1,CCL3L3,CCL5,CD274,CD79B,CDH5,CDKN1A,CIITA,CLU,CNTN2,CREB3L1,CSHL1,CXCL10,CXCR5,DNMT3B,DYNLT1,E2F2,EBF1,EGR2,ELL3,ENPP1,ERBB2,EXTL1,FABP2,FAM20C,FOS,FZD5,FZD7,GAS2L1,GAS7,GDA,GNAQ,HLA-DOA,HOPX,HTR6,HTRA1,IL15RA,IL23R,IL27,ILDR2,ITGB5,KCTD11,KLF15,KLF5,LCN2,LMNA,LRP6,LTBP4,MBNL3,MITF,MPL,NOTCH3,NRN1,NRP1,NUMBL,PAM,PAX5,PDGFRA,PF4,PLXNB3,PPP1R1B,PROX…	88
Cellular Development	maturation of cells	0.029	-2.17	Decreased	ATF3,BMP4,BTLA,CCL5,CD19,CDKN1A,CLU,CREB3L1,E2F2,FOS,FZD5,IL15RA,LCN2,MITF,NUMBL,PDGFA,PTGS2,RET,RNASE1,SCIN,SMAD1,TNFSF13B,TNFSF9,TREM2	24
Cell Morphology	sprouting	0.0551	-2.191	Decreased	A2M,BMP4,CALD1,CDKN1A,DYNLT1,FOS,GDA,HTR6,HTRA1,LCN2,NRN1,NRP1,NUMBL,OLR1,PROX1,RAPH1,RET,ROR2,SMAD1	19
Cell Morphology, Cellular Assembly and Organization, Cellular Function and Maintenance	formation of cellular protrusions	0.0425	-2.873	Decreased	A2M,Ang4,ARHGAP5,CALD1,CCL5,CDC42BPB,CDC42EP4,CDKN1A,CLU,CNTN2,CXCL10,DYNLT1,ERBB2,FOS,GAS7,GDA,HTR6,KCNJ2,KLF5,LCN2,LRRC16A,MTBP,NRN1,NRP1,NUMBL,P2RX1,PDGFA,PDGFRA,PSD,RAPH1,RET,ROR2,SDC4,SIRPB1,STMN3,VWF	36
Cell Morphology, Cellular Assembly and Organization, Cellular Function and Maintenance	formation of filopodia	0.038	-2.06	Decreased	Ang4,CCL5,CDC42BPB,CXCL10,ERBB2,MTBP,RET,ROR2,SDC4,SIRPB1,VWF	11
Cellular Assembly and Organization, Cellular Function and Maintenance	microtubule dynamics	0.0579	-2.796	Decreased	A2M,Ang4,ARHGAP5,ATF3,AXL,BMP4,CALD1,CCL5,CDC42BPB,CDC42EP4,CDKN1A,CLU,CNTN2,CXCL10,DYNLT1,ERBB2,FOS,GAS2L1,GAS7,GDA,HTR6,KCNJ2,KIFC3,KLF5,LCN2,LRRC16A,LTB4R,MTBP,MTUS1,NRN1,NRP1,NUMBL,P2RX1,PDGFA,PDGFRA,PLXND1,PSD,RAPH1,RET,ROR2,SCN1B,SDC4,SIRPB1,STMN3,VWF	45
Cellular Assembly and Organization, Cellular Function and Maintenance	organization of cytoskeleton	0.0481	-2.706	Decreased	A2M,Ang4,ARHGAP5,ARHGAP6,ATF3,AXL,BMP4,CALD1,CCL5,CDC42BPB,CDC42EP4,CDKN1A,CLU,CNTN2,CXADR,CXCL10,DYNLT1,ERBB2,FAT1,FOS,GAS2L1,GAS7,GDA,HTR6,JUP,KCNJ2,KIFC3,KLF5,LCN2,LRRC16A,LTB4R,MTBP,MTUS1,NRN1,NRP1,NUMBL,P2RX1,PAM,PDGFA,PDGFRA,PLXND1,PSD,RAPH1,RET,ROR2,SCN1B,SDC4,SIRPB1,STMN3,TGM2,TREM2,VWF	52
Cellular Compromise, Inflammatory Response	degranulation of cells	0.0579	-2.572	Decreased	ADORA3,ATF3,C3AR1,CCL3L3,CD274,FOS,KLRB1,LTB4R,MPO,NCR1,PF4,PILRA,VWF	13
Carbohydrate Metabolism	metabolism of carbohydrate	0.0722	-2.632	Decreased	ADORA3,AGPAT2,AKR7A2,ALDH5A1,CCL5,CD22,CHGA,CXCL10,DGAT2,ENPP1,ERBB2,F2RL2,GFPT2,GM2A,GNAQ,GPLD1,IL1R2,LARGE,LPL,LRP6,LTB4R,NOX1,PDGFA,PF4,PIK3C2B,PKLR,SERINC2,XYLB	28
