# Supplementary material for: Characterisation of the Whole Blood mRNA Transcriptome in Holstein-Friesian and Jersey Calves in Response to Gradual Weaning
Source: PLoS One. 2016 Aug 1;11(8):e0159707. doi: 10.1371/journal.pone.0159707 (PMC4968839; doi:10.1371/journal.pone.0159707)
Supplement: S12 Table — Genes coloured in red have increased expression in Jersey relative to Holstein-Friesian calves. Genes coloured in green have decreased expression in Jersey relative to Holstein-Friesian calves. (XLSX) [file pone.0159707.s012.xlsx]

## Sheet: Supplementary Table 5.21
S12 Table. Predicted activation states (increased or decreased) of biological functions identified by Ingenuity Pathway Analysis as enriched among the DEG between Holstein-Friesian and Jersey calves at day 1, relative to weaning
Categories	Diseases or Functions Annotation	Benjamini-Hochberg corrected p-Value	z-score	Predicted Activation State	Molecules (red=increased in Jersey relative to Holstein-Friesian, green=decreased in Jersey relative to Holstein-Friesian)	# Molecules
Cellular Movement	cell movement of blood cells	0.000407	-2.891	Decreased	AIF1,AQP9,BACH2,BMP4,BTLA,C2,C3AR1,CCL3,CCL3L3,CCL5,CD19,CDKN1A,CIITA,CLEC7A,CLU,CMA1,CXADR,CXCL10,CXCL5,EGR2,ERBB2,F11R,FOS,GPR34,ICAM1,IDO1,JAM2,KIT,LTB4R,LTC4S,MSR1,NLRP12,OLR1,PDGFRA,PF4,PLXND1,PRKCA,PROCR,PROX1,PTGS2,PTX3,SIGLEC8,TGM2,THBS1,TNFSF12,TREM2,VNN2	47
Cellular Movement	chemotaxis	0.0154	-3.115	Decreased	AIF1,AQP9,BMP4,C3AR1,CCL3,CCL3L3,CCL5,CDKN1A,CLU,CXADR,CXCL10,CXCL5,ERBB2,HRH4,ICAM1,KAL1,KIT,LTB4R,NLRP12,NPTX1,PDGFRA,PF4,PRKCA,PROX1,PTGS2,THBS1	26
Cellular Movement	chemotaxis of cells	0.0169	-3.115	Decreased	AIF1,AQP9,BMP4,C3AR1,CCL3,CCL3L3,CCL5,CDKN1A,CLU,CXADR,CXCL10,CXCL5,ERBB2,HRH4,ICAM1,KIT,LTB4R,NLRP12,NPTX1,PDGFRA,PF4,PRKCA,PROX1,PTGS2,THBS1	25
Cellular Movement	transmigration of cells	0.03	-2.029	Decreased	CCL3,CCL3L3,CCL5,CHGA,CXCL10,CXCL5,F11R,ICAM1,JAM2,TGM2	10
Cellular Movement	homing of blood cells	0.0454	-2.945	Decreased	AIF1,AQP9,BMP4,C3AR1,CCL3,CCL3L3,CCL5,CDKN1A,CXADR,CXCL10,CXCL5,ERBB2,ICAM1,LTB4R,NLRP12,PF4,PRKCA,THBS1	18
Cellular Movement, Hematological System Development and Function, Immune Cell Trafficking	cell movement of myeloid cells	0.00405	-3.238	Decreased	AIF1,AQP9,C2,C3AR1,CCL3,CCL3L3,CCL5,CDKN1A,CMA1,CXADR,CXCL10,CXCL5,ERBB2,F11R,ICAM1,LTB4R,LTC4S,MSR1,NLRP12,PF4,PLXND1,PRKCA,PTGS2,PTX3,SIGLEC8,TGM2,THBS1,TNFSF12,TREM2	29
Cellular Movement, Hematological System Development and Function, Immune Cell Trafficking	cell movement of granulocytes	0.00453	-2.566	Decreased	AQP9,C2,C3AR1,CCL3,CCL3L3,CCL5,CMA1,CXADR,CXCL10,CXCL5,ERBB2,ICAM1,LTB4R,LTC4S,MSR1,NLRP12,PF4,PRKCA,PTGS2,PTX3,SIGLEC8,TGM2	22
Cellular Movement, Hematological System Development and Function, Immune Cell Trafficking	cell movement of leukocytes	0.00543	-3.009	Decreased	AIF1,AQP9,BACH2,C2,C3AR1,CCL3,CCL3L3,CCL5,CDKN1A,CIITA,CMA1,CXADR,CXCL10,CXCL5,EGR2,ERBB2,F11R,FOS,ICAM1,IDO1,JAM2,KIT,LTB4R,LTC4S,MSR1,NLRP12,PF4,PLXND1,PRKCA,PROCR,PTGS2,PTX3,SIGLEC8,TGM2,THBS1,TNFSF12,TREM2	37
Cellular Movement, Hematological System Development and Function, Immune Cell Trafficking	cell movement of antigen presenting cells	0.0454	-2.947	Decreased	C3AR1,CCL3,CCL3L3,CCL5,CDKN1A,CXCL10,ERBB2,ICAM1,KIT,NLRP12,PF4,PLXND1,PTGS2,PTX3,THBS1,TNFSF12,TREM2	17
Cellular Movement, Hematological System Development and Function, Immune Cell Trafficking	transmigration of mononuclear leukocytes	0.0512	-2.406	Decreased	CCL3,CCL3L3,CCL5,F11R,ICAM1,TGM2	6
Cellular Movement, Hematological System Development and Function, Immune Cell Trafficking	migration of antigen presenting cells	0.053	-2.857	Decreased	CCL3,CCL3L3,CCL5,CXCL10,ICAM1,KIT,NLRP12,PLXND1,PTGS2,TREM2	10
Cellular Movement, Hematological System Development and Function, Immune Cell Trafficking, Inflammatory Response	chemotaxis of macrophages	0.00405	-2.159	Decreased	C3AR1,CCL3,CCL3L3,CCL5,CDKN1A,CXCL10,ERBB2,ICAM1,PF4,THBS1	10
Cellular Movement, Hematological System Development and Function, Immune Cell Trafficking, Inflammatory Response	chemotaxis of neutrophils	0.00436	-3.074	Decreased	AQP9,C3AR1,CCL3,CCL3L3,CCL5,CXADR,CXCL10,CXCL5,ICAM1,LTB4R,NLRP12,PF4,PRKCA	13
Cellular Movement, Hematological System Development and Function, Immune Cell Trafficking, Inflammatory Response	chemotaxis of myeloid cells	0.0139	-3.245	Decreased	AIF1,AQP9,C3AR1,CCL3,CCL3L3,CCL5,CDKN1A,CXADR,CXCL10,CXCL5,ERBB2,ICAM1,LTB4R,NLRP12,PF4,PRKCA,THBS1	17
Cellular Movement, Hematological System Development and Function, Immune Cell Trafficking, Inflammatory Response	chemotaxis of phagocytes	0.015	-3.245	Decreased	AIF1,AQP9,C3AR1,CCL3,CCL3L3,CCL5,CDKN1A,CXADR,CXCL10,CXCL5,ERBB2,ICAM1,LTB4R,NLRP12,PF4,PRKCA,THBS1	17
Cellular Movement, Hematological System Development and Function, Immune Cell Trafficking, Inflammatory Response	cell movement of neutrophils	0.0154	-2.68	Decreased	AQP9,C2,C3AR1,CCL3,CCL3L3,CCL5,CXADR,CXCL10,CXCL5,ERBB2,ICAM1,LTB4R,NLRP12,PF4,PRKCA,PTGS2,PTX3	17
Cellular Movement, Hematological System Development and Function, Immune Cell Trafficking, Inflammatory Response	cell movement of macrophages	0.0228	-2.653	Decreased	C3AR1,CCL3,CCL3L3,CCL5,CDKN1A,CXCL10,ERBB2,ICAM1,PF4,PLXND1,PTGS2,PTX3,THBS1,TNFSF12,TREM2	15
Cellular Movement, Hematological System Development and Function, Immune Cell Trafficking, Inflammatory Response	cell movement of phagocytes	0.0335	-3.378	Decreased	AIF1,AQP9,C2,C3AR1,CCL3,CCL3L3,CCL5,CDKN1A,CXADR,CXCL10,CXCL5,ERBB2,F11R,ICAM1,KIT,LTB4R,NLRP12,PF4,PLXND1,PRKCA,PTGS2,PTX3,THBS1,TNFSF12,TREM2	25
Cellular Movement, Immune Cell Trafficking	leukocyte migration	0.000477	-3.074	Decreased	AIF1,AQP9,BACH2,BTLA,C2,C3AR1,CCL3,CCL3L3,CCL5,CD19,CDKN1A,CIITA,CLEC7A,CLU,CMA1,CXADR,CXCL10,CXCL5,EGR2,ERBB2,F11R,FOS,GPR34,ICAM1,IDO1,JAM2,KIT,LTB4R,LTC4S,MSR1,NLRP12,OLR1,PDGFRA,PF4,PLXND1,PRKCA,PROCR,PROX1,PTGS2,PTX3,SIGLEC8,TGM2,THBS1,TNFSF12,TREM2,VNN2	46
Cell-To-Cell Signaling and Interaction	binding of cells	0.000943	-2.489	Decreased	BTLA,CALCRL,CCL3,CCL5,CD83,CDH5,CLEC10A,CLEC7A,CLGN,CXADR,CXCL10,ERBB2,GP5,GYLTL1B,HRH4,ICAM1,IL18RAP,IL1R2,KIT,LPL,MRAS,MSR1,OLR1,P2RY12,PF4,PRSS2,PTX3,TGM2,THBS1	29
Cell-To-Cell Signaling and Interaction, Cell-mediated Immune Response, Cellular Movement, Hematological System Development and Function, Immune Cell Trafficking	recruitment of T lymphocytes	0.044	-2.384	Decreased	CCL3,CCL5,CXCL10,FOS,ICAM1,TNFSF12	6
Cell-To-Cell Signaling and Interaction, Cellular Function and Maintenance, Inflammatory Response	phagocytosis of blood cells	0.0492	-2.38	Decreased	CHN1,CXCL10,FCN1,MSR1,PF4,PTX3,TGM2,THBS1,TREM2	9
Cell-To-Cell Signaling and Interaction, Cellular Function and Maintenance, Inflammatory Response	phagocytosis of leukocytes	0.0682	-2.764	Decreased	CXCL10,FCN1,MSR1,PF4,PTX3,TGM2,THBS1,TREM2	8
Cell-To-Cell Signaling and Interaction, Cellular Movement	recruitment of cells	0.0285	-2.598	Decreased	BTLA,C3AR1,CCL3,CCL3L3,CCL5,CD19,CLEC7A,CLU,CXCL10,CXCL5,FOS,ICAM1,LTB4R,OLR1,PTGS2,PTX3,THBS1,TNFSF12	18
Cell-To-Cell Signaling and Interaction, Cellular Movement, Hematological System Development and Function, Immune Cell Trafficking	recruitment of leukocytes	0.0227	-2.458	Decreased	BTLA,C3AR1,CCL3,CCL3L3,CCL5,CD19,CLEC7A,CLU,CXCL10,CXCL5,FOS,ICAM1,LTB4R,OLR1,PTX3,THBS1,TNFSF12	17
Cell-To-Cell Signaling and Interaction, Cellular Movement, Immune Cell Trafficking	attraction of granulocytes	0.0108	-2.183	Decreased	CCL3,CCL5,CXCL10,CXCL5,PF4	5
Cell-To-Cell Signaling and Interaction, Cellular Movement, Immune Cell Trafficking	attraction of phagocytes	0.0492	-2.201	Decreased	CCL3,CCL5,CXCL10,CXCL5,PF4	5
Cell-To-Cell Signaling and Interaction, Hematological System Development and Function, Immune Cell Trafficking, Tissue Development	adhesion of immune cells	0.0011	-3.092	Decreased	CCL3,CCL3L3,CCL5,CD83,CLEC10A,CLU,CXCL10,F11R,ICAM1,KIT,LTB4R,MRAS,MSR1,NPTX1,OCSTAMP,OLR1,PF4,PROCR,PTGS2,TERT,TGM2,THBS1,TNFSF12	23
Cell-To-Cell Signaling and Interaction, Inflammatory Response	response of phagocytes	0.0682	-2.934	Decreased	CCL3,CCL5,CLEC7A,CXCL10,FCN1,ICAM1,PF4,PTX3,TGM2,THBS1,TREM2	11
Cell-To-Cell Signaling and Interaction, Tissue Development	adhesion of blood cells	0.000407	-2.98	Decreased	CCL3,CCL3L3,CCL5,CD83,CLEC10A,CLU,CXCL10,F11R,GP5,ICAM1,KIT,LTB4R,MRAS,MSR1,NPTX1,OCSTAMP,OLR1,P2RY12,PF4,PROCR,PTGS2,PTX3,TERT,TGM2,THBS1,TNFSF12	26
Cardiovascular System Development and Function, Cellular Development, Cellular Growth and Proliferation	proliferation of endothelial cell lines	0.0196	2.178	Increased	BMP4,CDH5,CHGA,PF4,PROX1,PTX3,TERT,THBS1	8
Cardiovascular System Development and Function, Cellular Development, Cellular Growth and Proliferation, Skeletal and Muscular System Development and Function, Tissue Development	proliferation of cardiomyocytes	0.0608	2.2	Increased	CALCRL,CCL5,CXADR,CXCL10,KIT,PRKCA	6
Cellular Function and Maintenance	engulfment of blood cells	0.044	-2.579	Decreased	CCL5,CHN1,CXCL10,FCN1,MSR1,PF4,PTX3,TGM2,THBS1,TREM2	10
Cellular Function and Maintenance	engulfment of cells	0.0547	-2.699	Decreased	CCL3,CCL5,CHN1,CLEC7A,CXCL10,DAB2,ERBB2,FCN1,FZD5,ICAM1,MSR1,PF4,PLEKHF1,PRKCA,PTX3,TGM2,THBS1,TREM2	18
Cellular Function and Maintenance	engulfment of leukocytes	0.0585	-2.939	Decreased	CCL5,CXCL10,FCN1,MSR1,PF4,PTX3,TGM2,THBS1,TREM2	9
Cellular Function and Maintenance, Hematological System Development and Function	engulfment of myeloid cells	0.0682	-2.764	Decreased	CXCL10,FCN1,MSR1,PF4,PTX3,TGM2,THBS1,TREM2	8
Cell Signaling, Molecular Transport, Nucleic Acid Metabolism, Small Molecule Biochemistry	concentration of cyclic AMP	0.0434	2.038	Increased	CALCRL,CCL5,CHGA,CXCL10,GIPR,GPR161,HCAR3,HRH4,P2RY12,PTGS2,THBS1	11
Molecular Transport	transport of molecule	0.00661	-2.268	Decreased	AQP9,ATF3,ATP2C2,ATP8B1,BAIAP3,BMP4,CALCRL,CCL3,CCL5,CHGA,CLIC5,CLU,CPT1B,CREB3L1,CXCL10,DYNLT1,EGR2,ERBB2,FABP2,GM2A,GPLD1,HTR6,HVCN1,ITPR3,JUP,KCNK10,KCNN1,KCNS1,KIF13A,KLF15,LPL,LTBP4,MLC1,MSR1,NLRP12,NOX1,NPTX1,P2RY12,PRKCA,PTGS1,PTGS2,RET,RPH3A,RYR3,SCN4A,SERINC2,SLC20A2,SLC24A3,SLC25A42,SLC27A5,SLC29A4,SLC2A9,SLC4A3,SLC6A15,SLC9A5,STEAP2,SYT4,SYT7,TERT,THBS1,XK	61
