# Supplementary material for: Characterisation of the Whole Blood mRNA Transcriptome in Holstein-Friesian and Jersey Calves in Response to Gradual Weaning
Source: PLoS One. 2016 Aug 1;11(8):e0159707. doi: 10.1371/journal.pone.0159707 (PMC4968839; doi:10.1371/journal.pone.0159707)
Supplement: S13 Table — Genes coloured in red have increased expression in Jersey relative to Holstein-Friesian calves. Genes coloured in green have decreased expression in Jersey relative to Holstein-Friesian calves. (XLSX) [file pone.0159707.s013.xlsx]

## Sheet: Supplementary Table 5.22
		S13 Table. Predicted activation states (increased or decreased) of biological functions identified by Ingenuity Pathway Analysis as enriched among the DEG between Holstein-Friesian and Jersey calves at day 8, relative to weaning
Categories	Diseases or Functions Annotation	Benjamini-Hochberg corrected p-Value	z-score	Predicted Activation State	Molecules (red=increased in Jersey relative to Holstein-Friesian, green=decreased in Jersey relative to Holstein-Friesian)	# Molecules
Cell-To-Cell Signaling and Interaction	binding of cells	0.00279	-2.923	Decreased	BTLA,CALCRL,CCL3,CCL5,CDH5,CLEC10A,CLEC7A,CLGN,ERBB2,GP9,IL18RAP,IL1B,IL1R2,ITGB5,LAMA4,LPL,MRAS,MSR1,PF4,PPARG,PRSS2,PTX3,TGM2,THBS1,VWF	25
Cell-To-Cell Signaling and Interaction	response of leukemia cell lines	0.0461	-2	Decreased	FCN1,IL1B,PTX3,TGM2	4
Cell-To-Cell Signaling and Interaction	response of mononuclear leukocytes	0.047	-2.123	Decreased	CCL3,CLEC7A,IL1B,KLRB1,MERTK,MSR1,NCR1,PF4,PPARG,RET,SEMA4A	11
Cell-To-Cell Signaling and Interaction, Cellular Movement, Hematological System Development and Function, Immune Cell Trafficking	recruitment of granulocytes	0.0148	-2.568	Decreased	BTLA,CCL3,CCL3L3,CCL5,CXCL5,IL1B,LTB4R,MDK,PPARG,PTX3,THBS1,VWF	12
Cell-To-Cell Signaling and Interaction, Cellular Movement, Hematological System Development and Function, Immune Cell Trafficking	recruitment of leukocytes	0.0239	-2.919	Decreased	BTLA,CCL3,CCL3L3,CCL5,CLEC7A,CLU,CXCL5,IL1B,LTB4R,MDK,PPARG,PTX3,THBS1,TNFSF12,VWF	15
Cell-To-Cell Signaling and Interaction, Cellular Movement, Hematological System Development and Function, Immune Cell Trafficking, Inflammatory Response	recruitment of phagocytes	0.0298	-2.444	Decreased	CCL3,CCL3L3,CCL5,CLU,CXCL5,IL1B,LTB4R,MDK,PPARG,PTX3,THBS1,VWF	12
Cell-To-Cell Signaling and Interaction, Cellular Movement, Immune Cell Trafficking	attraction of myeloid cells	0.0166	-2.196	Decreased	CCL3,CCL5,CXCL5,IL1B,PF4	5
Cell-To-Cell Signaling and Interaction, Cellular Movement, Immune Cell Trafficking	attraction of phagocytes	0.0282	-2.198	Decreased	CCL3,CCL5,CXCL5,IL1B,PF4	5
Cell-To-Cell Signaling and Interaction, Hematological System Development and Function, Immune Cell Trafficking, Inflammatory Response	activation of neutrophils	0.0477	-2.184	Decreased	CCL3,CCL5,IL18RAP,IL1B,LTB4R,PF4	6
Cell-To-Cell Signaling and Interaction, Hematological System Development and Function, Immune Cell Trafficking, Tissue Development	adhesion of immune cells	0.00867	-3.522	Decreased	CCL3,CCL3L3,CCL5,CLEC10A,CLU,F11R,IL1B,LTB4R,MRAS,MSR1,NPTX1,OCSTAMP,PF4,PPARG,TGM2,THBS1,TNFSF12,VWF	18
Cell-To-Cell Signaling and Interaction, Inflammatory Response	immune response of leukocytes	0.0315	-2.789	Decreased	CCL3,FCN1,IL1B,KLRB1,MERTK,MSR1,NCR1,PF4,PPARG,PTX3,RET,SEMA4A,TGM2,THBS1	14
Cell-To-Cell Signaling and Interaction, Tissue Development	adhesion of blood cells	0.00867	-3.078	Decreased	CCL3,CCL3L3,CCL5,CLEC10A,CLU,F11R,IL1B,LTB4R,MRAS,MSR1,NPTX1,OCSTAMP,PF4,PPARG,PTX3,TGM2,THBS1,TNFSF12,VWF	19
Cardiovascular System Development and Function, Cellular Movement	migration of vascular endothelial cells	0.000443	2.065	Increased	BMP4,CDH5,CHGA,ERBB2,F11R,HTR6,IL1B,MDK,MET,PIK3C2B,PLXND1,PROX1,S1PR3,THBS1	14
Cellular Movement	cell movement of blood cells	0.0022	-2.737	Decreased	AIF1,BACH2,BMP4,BTLA,C5AR2,CCL3,CCL3L3,CCL5,CDKN1A,CLEC7A,CLU,CXCL5,EGR2,ERBB2,F11R,IDO1,IL1B,JAM2,LTB4R,LTC4S,MDK,MSR1,NLRP12,PDGFRA,PF4,PLXND1,PPARG,PRKCA,PROX1,PTX3,S1PR3,S1PR5,SEMA4A,SIGLEC8,TGM2,THBS1,TNFSF12,VNN2,VWF	39
Cellular Movement	chemotaxis of cells	0.0111	-2.14	Decreased	AIF1,BMP4,C5AR2,CCL3,CCL3L3,CCL5,CDKN1A,CLU,CXCL5,ERBB2,IL1B,LTB4R,MDK,NLRP12,NPTX1,PDGFRA,PF4,PPARG,PRKCA,PROX1,S1PR3,SCN1B,THBS1	23
Cellular Movement, Hematological System Development and Function	mobilization of blood cells	0.00877	-2.401	Decreased	CCL3,CCL3L3,F11R,FLT3,IL1B,PF4,S1PR5	7
Cellular Movement, Hematological System Development and Function	extravasation of leukocytes	0.0225	-2.19	Decreased	CCL3,CCL3L3,CCL5,IL1B,VWF	5
Cellular Movement, Hematological System Development and Function, Immune Cell Trafficking	cell movement of myeloid cells	0.00415	-2.548	Decreased	AIF1,C5AR2,CCL3,CCL3L3,CCL5,CDKN1A,CXCL5,ERBB2,F11R,IL1B,LTB4R,LTC4S,MDK,MSR1,NLRP12,PF4,PLXND1,PPARG,PRKCA,PTX3,SEMA4A,SIGLEC8,TGM2,THBS1,TNFSF12,VWF	26
Cellular Movement, Hematological System Development and Function, Immune Cell Trafficking	mobilization of leukocytes	0.008	-2.19	Decreased	CCL3,CCL3L3,F11R,IL1B,PF4,S1PR5	6
Cellular Movement, Hematological System Development and Function, Immune Cell Trafficking	cell movement of leukocytes	0.00834	-2.433	Decreased	AIF1,BACH2,C5AR2,CCL3,CCL3L3,CCL5,CDKN1A,CXCL5,EGR2,ERBB2,F11R,IDO1,IL1B,JAM2,LTB4R,LTC4S,MDK,MSR1,NLRP12,PF4,PLXND1,PPARG,PRKCA,PTX3,S1PR3,S1PR5,SEMA4A,SIGLEC8,TGM2,THBS1,TNFSF12,VWF	32
Cellular Movement, Hematological System Development and Function, Immune Cell Trafficking	cell movement of antigen presenting cells	0.0424	-2.107	Decreased	CCL3,CCL3L3,CCL5,CDKN1A,ERBB2,IL1B,MDK,NLRP12,PF4,PLXND1,PTX3,S1PR3,SEMA4A,THBS1,TNFSF12	15
Cellular Movement, Hematological System Development and Function, Immune Cell Trafficking, Inflammatory Response	chemotaxis of myeloid cells	0.00853	-2.453	Decreased	AIF1,C5AR2,CCL3,CCL3L3,CCL5,CDKN1A,CXCL5,ERBB2,IL1B,LTB4R,MDK,NLRP12,PF4,PPARG,PRKCA,THBS1	16
Cellular Movement, Hematological System Development and Function, Immune Cell Trafficking, Inflammatory Response	chemotaxis of neutrophils	0.00879	-2.43	Decreased	C5AR2,CCL3,CCL3L3,CCL5,CXCL5,IL1B,LTB4R,MDK,NLRP12,PF4,PRKCA	11
Cellular Movement, Hematological System Development and Function, Immune Cell Trafficking, Inflammatory Response	chemotaxis of granulocytes	0.00962	-2.179	Decreased	C5AR2,CCL3,CCL3L3,CCL5,CXCL5,IL1B,LTB4R,MDK,NLRP12,PF4,PPARG,PRKCA	12
Cellular Movement, Hematological System Development and Function, Immune Cell Trafficking, Inflammatory Response	chemotaxis of leukocytes	0.0151	-2.09	Decreased	AIF1,C5AR2,CCL3,CCL3L3,CCL5,CDKN1A,CXCL5,ERBB2,IL1B,LTB4R,MDK,NLRP12,PF4,PPARG,PRKCA,S1PR3,THBS1	17
Cellular Movement, Hematological System Development and Function, Immune Cell Trafficking, Inflammatory Response	chemotaxis of phagocytes	0.0154	-2.522	Decreased	AIF1,C5AR2,CCL3,CCL3L3,CCL5,CDKN1A,CXCL5,ERBB2,IL1B,LTB4R,MDK,NLRP12,PF4,PRKCA,THBS1	15
Cellular Movement, Hematological System Development and Function, Immune Cell Trafficking, Inflammatory Response	cell movement of phagocytes	0.0204	-2.311	Decreased	AIF1,C5AR2,CCL3,CCL3L3,CCL5,CDKN1A,CXCL5,ERBB2,F11R,IL1B,LTB4R,MDK,NLRP12,PF4,PLXND1,PPARG,PRKCA,PTX3,S1PR3,SEMA4A,THBS1,TNFSF12,VWF	23
Cellular Movement, Hematological System Development and Function, Immune Cell Trafficking, Inflammatory Response	cell movement of macrophages	0.0282	-2.517	Decreased	CCL3,CCL3L3,CCL5,CDKN1A,ERBB2,IL1B,MDK,PF4,PLXND1,PTX3,SEMA4A,THBS1,TNFSF12	13
Cellular Movement, Hematological System Development and Function, Immune Cell Trafficking, Inflammatory Response	cell movement of neutrophils	0.0292	-2.089	Decreased	C5AR2,CCL3,CCL3L3,CCL5,CXCL5,ERBB2,IL1B,LTB4R,MDK,NLRP12,PF4,PRKCA,PTX3,VWF	14
Cellular Movement, Hematological System Development and Function, Immune Cell Trafficking, Inflammatory Response	migration of macrophages	0.0459	-2.415	Decreased	CCL3,CCL3L3,CCL5,MDK,PLXND1,SEMA4A	6
Cellular Movement, Immune Cell Trafficking	leukocyte migration	0.00323	-2.925	Decreased	AIF1,BACH2,BTLA,C5AR2,CCL3,CCL3L3,CCL5,CDKN1A,CLEC7A,CLU,CXCL5,EGR2,ERBB2,F11R,IDO1,IL1B,JAM2,LTB4R,LTC4S,MDK,MSR1,NLRP12,PDGFRA,PF4,PLXND1,PPARG,PRKCA,PROX1,PTX3,S1PR3,S1PR5,SEMA4A,SIGLEC8,TGM2,THBS1,TNFSF12,VNN2,VWF	38
Cellular Development	differentiation of cells	0.0256	-3.308	Decreased	ADRB1,ASCL2,BACH2,BMP4,CCL3,CCL3L3,CCL5,CDH5,CDKN1A,Cdkn1c,CDKN2A,CLU,CREB3L1,DAB2,Dmd,DNMT3B,DYNLT1,EGR2,EID2,ELL3,ERBB2,EXTL1,F11R,FABP2,FAM20C,FBXO40,FLT3,FZD7,GADD45G,GAS2L1,HOPX,HTR6,IL1B,ITGB5,KCTD11,KLF15,LAMA4,LMNA,LTBP4,MBNL3,MDK,MERTK,MET,MPL,MRAS,NRN1,OCSTAMP,PDGFRA,PF4,PLXNB3,PPARG,PPP1R1B,PRKCA,PROX1,PTCH1,RET,S1PR3,S1PR5,SEMA4A,SIGLEC8,SMAD1,TGM2,THBS1,TNFSF12	64
Cellular Development, Cellular Growth and Proliferation	proliferation of prostate cancer cell lines	0.0452	2.064	Increased	CDKN1A,CDKN2A,CHGA,CLU,DAB2,ERBB2,GADD45G,IL1B,MET,PDGFRA,PPARG,STEAP2	12
Cellular Development, Cellular Growth and Proliferation, Skeletal and Muscular System Development and Function, Tissue Development	proliferation of smooth muscle cells	0.00568	-2.039	Decreased	AIF1,BMP4,CALCRL,CCL3,CCL5,CDKN1A,Cdkn1c,CDKN2A,CLU,FHL1,IL1B,NOX1,PRKCA,TGM2,THBS1,TNFSF12	16
Cell Cycle	entry into S phase	0.0216	2.576	Increased	CCL3,CDKN1A,Cdkn1c,CDKN2A,ERBB2,IL1B,LMNA,MET,PPARG	9
Cellular Function and Maintenance	engulfment of cells	0.0487	-2.275	Decreased	CCL3,CCL5,CLEC7A,DAB2,ERBB2,FCN1,ITGB5,MERTK,MSR1,PF4,PLEKHF1,PRKCA,PTX3,TGM2,THBS1,VWF	16
Cell Morphology	cell spreading	0.035	-2.211	Decreased	CCL5,CDKN2A,DAB2,ERBB2,GBP2,KLRC1,MET,MSR1,PDGFA,THBS1,UCHL1,VWF,ZYX	13
